# Supplementary material for: Synthesis of inositol phosphate-based competitive antagonists of inositol 1,4,5-trisphosphate receptors
Source: Royal Society of Chemistry journal article supplement (doi:10.1039/c5ob02623g), 2016-01-01

## ELECTRONIC SUPPLEMENTARY INFORMATION

### Synthesis of Inositol Phosphate-Based Competitive Antagonists of Inositol 1,4,5-Trisphosphate Receptors

Vera Konieczny,<sup>a</sup> John. G. Stefanakis,<sup>b</sup> Efstratios D. Sitsanidis,<sup>b</sup> Natalia-Anastasia T. Ioannidou,<sup>b</sup> Nikolaos V. Papadopoulos,<sup>b</sup> Konstantina C. Fylaktakidou,<sup>c</sup> Colin W. Taylor,<sup>a\*</sup> and Alexandros E. Koumbis<sup>b\*</sup>

<sup>a</sup>Department of Pharmacology, Tennis Court Road, Cambridge, CB2 1PD, United Kingdom. E-mail: [cwt1000@cam.ac.uk](mailto:cwt1000@cam.ac.uk)

<sup>b</sup>Laboratory of Organic Chemistry, Chemistry Department, Aristotle University of Thessaloniki, 54124 Thessaloniki, Greece. E-mail: [akoumbis@chem.auth.gr](mailto:akoumbis@chem.auth.gr)

<sup>c</sup>Laboratory of Organic, Bioorganic and Natural Product Chemistry, Molecular Biology and Genetics Department, Democritus University of Thrace, 68100 Alexandroupolis, Greece.

#### Table of contents

|                                                                                                                                                                  |         |
|------------------------------------------------------------------------------------------------------------------------------------------------------------------|---------|
| <b>Table S1.</b> Summary of dimerization reactions of <b>21</b> with malonic and succinic acid                                                                   | S3      |
| <b>Table S2.</b> Ca <sup>2+</sup> release evoked by inositol phosphates and their binding to IP <sub>3</sub> R1                                                  | S4      |
| <b>Table S3.</b> (1,2,3,4,6)IP <sub>5</sub> ( <b>4</b> ) and a dimer of (1,2,3,4,6)IP <sub>5</sub> ( <b>6</b> ) are competitive antagonists of IP <sub>3</sub> R | S4      |
| Synthetic procedures and spectral data for the synthesized compounds                                                                                             | S5-S16  |
| <sup>1</sup> H, <sup>13</sup> C and <sup>31</sup> P NMR spectra of <b>3</b>                                                                                      | S17-S18 |
| <sup>1</sup> H, <sup>13</sup> C and <sup>31</sup> P NMR spectra of <b>4</b>                                                                                      | S19-S20 |
| <sup>1</sup> H, <sup>13</sup> C and <sup>31</sup> P NMR spectra of <b>5</b>                                                                                      | S21-S22 |
| <sup>1</sup> H, <sup>13</sup> C and <sup>31</sup> P NMR spectra of <b>6</b>                                                                                      | S23-S24 |
| <sup>1</sup> H, <sup>13</sup> C and <sup>31</sup> P NMR spectra of <b>7</b>                                                                                      | S25-S26 |
| <sup>1</sup> H, <sup>13</sup> C and <sup>31</sup> P NMR spectra of <b>8</b>                                                                                      | S27-S28 |
| <sup>1</sup> H, <sup>13</sup> C and <sup>31</sup> P NMR spectra of <b>9</b>                                                                                      | S29-S30 |
| <sup>1</sup> H, <sup>13</sup> C and <sup>31</sup> P NMR spectra of <b>10</b>                                                                                     | S31-S32 |
| <sup>1</sup> H, <sup>13</sup> C and <sup>31</sup> P NMR spectra of <b>11</b>                                                                                     | S33-S34 |
| <sup>1</sup> H, <sup>13</sup> C and <sup>31</sup> P NMR spectra of <b>12</b>                                                                                     | S35-S36 |
| <sup>1</sup> H, <sup>13</sup> C and <sup>31</sup> P NMR spectra of <b>15b</b>                                                                                    | S37-S38 |
| <sup>1</sup> H and <sup>13</sup> C NMR spectra of <b>16a</b>                                                                                                     | S39     |
| <sup>1</sup> H and <sup>13</sup> C NMR spectra of <b>16b</b>                                                                                                     | S40     |
| <sup>1</sup> H and <sup>13</sup> C NMR spectra of <b>16c</b>                                                                                                     | S41     |
| <sup>1</sup> H and <sup>13</sup> C NMR spectra of <b>16d</b>                                                                                                     | S42     |
| <sup>1</sup> H and <sup>13</sup> C NMR spectra of <b>17a</b>                                                                                                     | S43     |
| <sup>1</sup> H, <sup>13</sup> C and <sup>31</sup> P NMR spectra of <b>17b</b>                                                                                    | S44-S45 |
| <sup>1</sup> H and <sup>13</sup> C NMR spectra of <b>22</b>                                                                                                      | S46     |
| <sup>1</sup> H and <sup>13</sup> C NMR spectra of <b>23a</b>                                                                                                     | S47     |
| <sup>1</sup> H and <sup>13</sup> C NMR spectra of <b>23b</b>                                                                                                     | S48     |
| <sup>1</sup> H and <sup>13</sup> C NMR spectra of <b>24a</b>                                                                                                     | S49     |

|                                                                              |         |
|------------------------------------------------------------------------------|---------|
| $^1\text{H}$ and $^{13}\text{C}$ NMR spectra of <b>24b</b>                   | S50     |
| $^1\text{H}$ and $^{13}\text{C}$ NMR spectra of <b>24c</b>                   | S51     |
| $^1\text{H}$ and $^{13}\text{C}$ NMR spectra of <b>25a</b>                   | S52     |
| $^1\text{H}$ and $^{13}\text{C}$ NMR spectra of <b>25b</b>                   | S53     |
| $^1\text{H}$ and $^{13}\text{C}$ NMR spectra of <b>28a</b>                   | S54     |
| $^1\text{H}$ and $^{13}\text{C}$ NMR spectra of <b>28b</b>                   | S55     |
| $^1\text{H}$ and $^{13}\text{C}$ NMR spectra of <b>28c</b>                   | S56     |
| $^1\text{H}$ and $^{13}\text{C}$ NMR spectra of <b>28d</b>                   | S57     |
| $^1\text{H}$ and $^{13}\text{C}$ NMR spectra of <b>29a</b>                   | S58     |
| $^1\text{H}$ and $^{13}\text{C}$ NMR spectra of <b>29b</b>                   | S59     |
| $^1\text{H}$ and $^{13}\text{C}$ NMR spectra of <b>29c</b>                   | S60     |
| $^1\text{H}$ and $^{13}\text{C}$ NMR spectra of <b>29d</b>                   | S61     |
| $^1\text{H}$ and $^{13}\text{C}$ NMR spectra of <b>30a</b>                   | S62     |
| $^1\text{H}$ and $^{13}\text{C}$ NMR spectra of <b>30b</b>                   | S63     |
| $^1\text{H}$ and $^{13}\text{C}$ NMR spectra of <b>30c</b>                   | S64     |
| $^1\text{H}$ and $^{13}\text{C}$ NMR spectra of <b>30d</b>                   | S65     |
| $^1\text{H}$ and $^{13}\text{C}$ NMR spectra of <b>30e</b>                   | S66     |
| $^1\text{H}$ and $^{13}\text{C}$ NMR spectra of <b>30f</b>                   | S67     |
| $^1\text{H}$ and $^{13}\text{C}$ NMR spectra of <b>30g</b>                   | S68     |
| $^1\text{H}$ and $^{13}\text{C}$ NMR spectra of <b>30h</b>                   | S69     |
| $^1\text{H}$ , $^{13}\text{C}$ and $^{31}\text{P}$ NMR spectra of <b>31a</b> | S70-S71 |
| $^1\text{H}$ , $^{13}\text{C}$ and $^{31}\text{P}$ NMR spectra of <b>31b</b> | S72-S73 |
| $^1\text{H}$ , $^{13}\text{C}$ and $^{31}\text{P}$ NMR spectra of <b>31c</b> | S74-S75 |
| $^1\text{H}$ , $^{13}\text{C}$ and $^{31}\text{P}$ NMR spectra of <b>31d</b> | S76-S77 |
| $^1\text{H}$ , $^{13}\text{C}$ and $^{31}\text{P}$ NMR spectra of <b>31e</b> | S78-S79 |
| $^1\text{H}$ , $^{13}\text{C}$ and $^{31}\text{P}$ NMR spectra of <b>31f</b> | S80-S81 |
| $^1\text{H}$ , $^{13}\text{C}$ and $^{31}\text{P}$ NMR spectra of <b>31g</b> | S82-S83 |
| $^1\text{H}$ , $^{13}\text{C}$ and $^{31}\text{P}$ NMR spectra of <b>31h</b> | S84-S85 |

**Table S1.** Summary of dimerization reactions of **21** with malonic (**M**) and succinic acid (**S**).

| Entry | Acid     | Reagents               | Solvent                         | Products (yields %) <sup>a</sup>              |
|-------|----------|------------------------|---------------------------------|-----------------------------------------------|
| 1     | <b>M</b> | DCC/DMAP <sup>b</sup>  | CH <sub>2</sub> Cl <sub>2</sub> | <b>22</b> (37)                                |
| 2     | <b>M</b> | DCC/DMAP <sup>b</sup>  | Et <sub>2</sub> O               | <b>22</b> (12)                                |
| 3     | <b>M</b> | DIC/DMAP <sup>b</sup>  | CH <sub>2</sub> Cl <sub>2</sub> | <b>22</b> (41)                                |
| 4     | <b>M</b> | DCC/DIPEA <sup>b</sup> | CH <sub>2</sub> Cl <sub>2</sub> | <b>24b</b> (6)                                |
| 5     | <b>M</b> | DCC <sup>c</sup>       | Et <sub>2</sub> O               | <b>23a</b> (62), <b>24b</b> (12) <sup>d</sup> |
| 6     | <b>M</b> | DIC <sup>c</sup>       | Et <sub>2</sub> O               | <b>23a</b> (37), <b>24a</b> (7)               |
| 7     | <b>M</b> | DIC <sup>c</sup>       | CH <sub>2</sub> Cl <sub>2</sub> | <b>23a</b> (39), <b>24a</b> (7)               |
| 8     | <b>S</b> | DCC <sup>c</sup>       | Et <sub>2</sub> O               | recovered <b>21</b> (100)                     |
| 9     | <b>S</b> | DCC/DMAP <sup>b</sup>  | CH <sub>2</sub> Cl <sub>2</sub> | <b>23b</b> (56), <b>24c</b> (28) <sup>d</sup> |
| 10    | <b>S</b> | EDC/DMAP <sup>b</sup>  | CH <sub>2</sub> Cl <sub>2</sub> | <b>23b</b> (55)                               |

<sup>a</sup> Yields refer to pure products obtained after chromatographic purification, unless otherwise stated.

<sup>b</sup> 4 equivalents of carbodiimide and 0.4 equivalents of base were used.

<sup>c</sup> 4 equivalents of carbodiimide were used.

<sup>d</sup> These compounds were obtained as an inseparable mixture and their ratio was determined from the <sup>1</sup>H NMR spectrum.

**Table S2.** Ca<sup>2+</sup> release evoked by inositol phosphates **1-4** and their binding to IP<sub>3</sub>R1.<sup>a</sup>

| Compound                                                      | Ca <sup>2+</sup> release |                        |                         | Binding               |                      | pEC <sub>50</sub> -pK <sub>d</sub>       |                                     |
|---------------------------------------------------------------|--------------------------|------------------------|-------------------------|-----------------------|----------------------|------------------------------------------|-------------------------------------|
|                                                               | pEC <sub>50</sub><br>/M  | EC <sub>50</sub><br>nM | Maximal<br>release<br>% | pK <sub>d</sub><br>/M | K <sub>d</sub><br>nM | pEC <sub>50</sub> -pK <sub>d</sub><br>/M | EC <sub>50</sub><br>/K <sub>d</sub> |
| (1,4,5)IP <sub>3</sub> ( <b>1</b> )                           | 6.97 ± 0.04              | 107                    | 68 ± 5                  | 6.90 ± 0.19           | 127                  | 0.07 ± 0.06                              | 0.85                                |
| (1,3,4,6)IP <sub>4</sub> ( <b>2</b> )                         | 5.64 ± 0.07*             | 2291                   | 68 ± 5                  | 5.35 ± 0.07*          | 4490                 | 0.29 ± 0.08                              | 0.51                                |
| 2- <i>O</i> -butyryl<br>(1,3,4,6)IP <sub>4</sub> ( <b>3</b> ) | 5.21 ± 0.01*             | 7934                   | 49 ± 6*                 | 5.32 ± 0.06*          | 4800                 | -                                        | -                                   |
| (1,2,3,4,6)IP <sub>5</sub> ( <b>4</b> )                       | -                        | -                      | 0                       | 4.46 ± 0.03*          | 22900                | -                                        | -                                   |

<sup>a</sup>Summary results from Fig. 2B, C show Ca<sup>2+</sup> release evoked by maximally effective concentrations of each analog and pEC<sub>50</sub> values as means ± s.e.m., and EC<sub>50</sub> values determined in Ca<sup>2+</sup> release experiments (n = 3). pK<sub>d</sub> (means ± s.e.m.) and K<sub>d</sub> values were derived from equilibrium-competition binding experiments (n = 3). pEC<sub>50</sub>-pK<sub>d</sub> values (means ± s.e.m.) were calculated as described in the Experimental Section. Statistical differences were determined by one-way ANOVA and Tukey's post hoc test and refer to (1,4,5)IP<sub>3</sub> (**1**), \*P < 0.05. Hill coefficients were not significantly different.

**Table S3.** (1,2,3,4,6)IP<sub>5</sub> (**4**) and a dimer of (1,2,3,4,6)IP<sub>5</sub> (**6**) are competitive antagonists of IP<sub>3</sub>R.<sup>a</sup>

| Compound                                       | pEC <sub>50</sub><br>/M | ΔpEC <sub>50</sub><br>/M | EC <sub>50</sub><br>nM | Maximal<br>release<br>% | n <sub>H</sub> | K <sub>d</sub><br>nM |
|------------------------------------------------|-------------------------|--------------------------|------------------------|-------------------------|----------------|----------------------|
| control                                        | 7.33 ± 0.21             | -                        | 47                     | 83 ± 1                  | 1.74 ± 0.38    | -                    |
| +(1,2,3,4,6)IP <sub>5</sub> ( <b>4</b> )       | 6.94 ± 0.22*            | 0.38 ± 0.04              | 115                    | 78 ± 2                  | 1.36 ± 0.13    | 69                   |
| +(1,2,3,4,6)IP <sub>5</sub> dimer ( <b>6</b> ) | 6.01 ± 0.22*            | 1.32 ± 0.01              | 977                    | 75 ± 3                  | 1.36 ± 0.21    | 5                    |

<sup>a</sup> Summary results from Figure 3B. Ca<sup>2+</sup> release evoked by maximally effective concentrations of (1,4,5)IP<sub>3</sub> alone (control) or the presence of 100 μM of the indicated analogs, pEC<sub>50</sub> and ΔpEC<sub>50</sub> (pEC<sub>50</sub><sup>control</sup> - pEC<sub>50</sub><sup>antagonist</sup>) values and Hill coefficients (n<sub>H</sub>) (means ± s.e.m.), and EC<sub>50</sub> values for (1,4,5)IP<sub>3</sub> (n = 3). K<sub>d</sub> is the equilibrium dissociation constant for the antagonist calculated from the Ca<sup>2+</sup> release experiments as described in the Experimental Section. Statistical differences were determined by one-way ANOVA and Tukey's post hoc test and refer to the control antagonist, \*P < 0.05.

**1,6:3,4-bis-[O-(2,3-dimethoxybutane-2,3-diyl)]-myo-inositol (14).** Diol **14** was prepared from *myo*-inositol (**13**) in 33% yield, following a known procedure.<sup>51</sup>

**Tetrasodium 1,3,4,6-*myo*-inositol tetrakisphosphate (2).** Phosphate **2** was prepared from diol **14**, following a known four-step reaction sequence.<sup>52</sup>

**2-*O*-benzyl-1,6:3,4-bis-[O-(2,3-dimethoxybutane-2,3-diyl)]-*myo*-inositol (15a).** Pentaol **15a** was prepared from *myo*-inositol (**13**), following a known three-step reaction sequence.<sup>53</sup>

**Decabenzyl 1,2,3,4,6-(5-*O*-benzyl-*myo*-inosityl) pentakisphosphate (15b).** Benzyl phosphate **15b** was prepared from pentaol **15a** according to General Procedure E. Yield: 73%. Colorless thick oil.  $R_f = 0.15$  (hexanes/EtOAc 1:1).  $^1\text{H}$  NMR (500 MHz,  $\text{CDCl}_3$ )  $\delta$  7.36 (d,  $J = 7.3$  Hz, 2H, 2 $\times$ ArH), 7.23–7.02 (m, 49H, 49 $\times$ ArH), 6.84 (d,  $J = 7.1$  Hz, 4H, 4 $\times$ ArH), 5.56 (br d,  $^3J_{\text{HP}} = 8.7$  Hz, 1H, H-2), 5.14–4.75 (m, 22H, 10 $\times$ CH<sub>2</sub>Ph & H-4 & H-6), 4.51 (dd,  $J = 11.7, 9.5$  Hz, 2H, CH<sub>2</sub>Ph), 4.32 (br t,  $^3J_{\text{HP}} = 9.3$  Hz, 2H, H-1 & H-3), 3.46 (t,  $J = 9.4$  Hz, 1H, H-5) ppm.  $^{13}\text{C}$  NMR (126 MHz,  $\text{CDCl}_3$ )  $\delta$  137.7 (C-*i*Ar), 135.8 (d,  $^3J_{\text{CP}} = 7.2$  Hz, 2 $\times$ C-*i*Ar), 135.6 (d,  $^3J_{\text{CP}} = 9.0$  Hz, 2 $\times$ C-*i*Ar), 135.54 (d,  $^3J_{\text{CP}} = 6.8$  Hz, 4 $\times$ C-*i*Ar), 135.49 (d,  $^3J_{\text{CP}} = 7.2$  Hz, 2 $\times$ C-*i*Ar), 128.4, 128.30, 128.28, 128.21, 128.16, 128.07, 128.06, 128.03, 127.96, 127.8, 127.7, 127.1 (C-*o*Ar, C-*m*Ar, C-*p*Ar), 78.8 (C-5), 76.7 (t,  $^3J_{\text{CP}} = 6.1$  Hz, C-4 & C-6), 76.0 (d,  $^3J_{\text{CP}} = 5.0$  Hz, C-2), 74.6 (CH<sub>2</sub>Ph), 73.7 (br s, C-1 & C-3), 70.02 (d,  $^2J_{\text{CP}} = 5.6$  Hz, 2 $\times$ CH<sub>2</sub>Ph), 69.74 (d,  $^2J_{\text{CP}} = 6.6$  Hz, 2 $\times$ CH<sub>2</sub>Ph), 69.69 (d,  $^2J_{\text{CP}} = 6.2$  Hz, 2 $\times$ CH<sub>2</sub>Ph), 69.46 (d,  $^2J_{\text{CP}} = 5.7$  Hz, 2 $\times$ CH<sub>2</sub>Ph), 69.25 (d,  $^2J_{\text{CP}} = 5.2$  Hz, 2 $\times$ CH<sub>2</sub>Ph) ppm.  $^{31}\text{P}$  NMR (202 MHz,  $\text{CDCl}_3$ ,  $^{31}\text{P}$ - $^1\text{H}$  decoupled): -0.77 (2P), -1.53 (2P), -2.81 (1P) ppm. HRMS (ESI) calcd. for  $\text{C}_{83}\text{H}_{83}\text{NaO}_{21}\text{P}_5$  [M+Na]<sup>+</sup> 1593.4007; found 1593.4019.

**Pentasodium 1,2,3,4,6-*myo*-inosityl pentakisphosphate (3).** Phosphate **3** was prepared from benzyl phosphate **15b**, according to General Procedure F. Reaction time: 48 h. Yield: 100%. White amorphous solid.  $^1\text{H}$  NMR (500 MHz, D<sub>2</sub>O)  $\delta$  4.72 (br d,  $^3J_{\text{HP}} = 8.8$  Hz, 1H, H-2), 4.24 (q,  $^3J_{\text{HP}} = ^3J_{\text{HH}} = 9.1$  Hz, 2H, H-4 & H-6), 4.04 (br t,  $^3J_{\text{HP}} = 8.9$  Hz, 2H, H-1 & H-3), 3.55 (t,  $J = 8.8$  Hz, 1H, H-5) ppm.  $^{13}\text{C}$  NMR (126 MHz, D<sub>2</sub>O)  $\delta$  76.5 (br t,  $^2J_{\text{CP}} = 5.9$  Hz, C-4 & C-6), 75.3 (br d,  $^2J_{\text{CP}} = 5.7$  Hz, C-2), 73.3 (br s, C-1 & C-3), 72.9 (br s, C-5) ppm.  $^{31}\text{P}$  NMR (202 MHz, D<sub>2</sub>O)  $^{31}\text{P}$ - $^1\text{H}$  decoupled): 0.77 (2P), 0.63 (2P), -0.11 (1P) ppm. HRMS (ESI) calcd. for  $\text{C}_6\text{H}_{12}\text{Na}_4\text{O}_{21}\text{P}_5$  [M-Na]<sup>-</sup> 666.8155; found 666.8147.

**2-*O*-*p*-Methoxybenzyl-1,6:3,4-bis-[O-(2,3-dimethoxybutane-2,3-diyl)]-*myo*-inositol (16a).** A solution of diol **14** (410 mg, 1 mmol) in dry DMF (10 mL) was cooled to 0 °C under an Ar atmosphere. 90% NaH (30 mg, 1.1 mmol) was added in one portion and the resulting slurry was stirred at the same temperature for 1 h. Then, PMBCl (150 mL, 1.1 mmol) was added dropwise and the mixture was stirred for 12 h, while it was left to warm up to room temperature. MeOH (0.2 mL) was added and the mixture was stirred at room temperature for 1 h. CH<sub>2</sub>Cl<sub>2</sub> (10 mL) was added and the resulting solution was washed with H<sub>2</sub>O (10 mL). The aqueous phase was back-extracted with CH<sub>2</sub>Cl<sub>2</sub> (10 mL) and the combined organic phases were washed with saturated brine (20 mL), dried over Na<sub>2</sub>SO<sub>4</sub>, and concentrated *in vacuo*. The residue was purified with flash column chromatography (hexanes/EtOAc 7:1 to 2:1) to give PMB-ether **16a** (355 mg, 67%) as a white amorphous solid.  $R_f = 0.18$  (hexanes/EtOAc 1:1).  $^1\text{H}$  NMR (500 MHz,  $\text{CDCl}_3$ )  $\delta$  7.44 (d,  $J = 8.4$  Hz, 2H, 2 $\times$ ArH), 6.85 (d,  $J = 8.4$  Hz, 2H, 2 $\times$ ArH), 4.78 (s, 2H, CH<sub>2</sub>Ar), 4.04 (t,  $J = 9.8$  Hz, 2H, H-4 & H-6), 3.80 (s, 3H, CH<sub>3</sub>OAr), 3.78 (t,  $J = 1.8$  Hz, 1H, H-2), 3.65 (t,  $J = 9.4$  Hz, 1H, H-5), 3.52 (dd,  $J = 10.3, 1.8$  Hz, 2H, H-1 & H-3), 3.27 (s, 6H, 2 $\times$ OCH<sub>3</sub>), 3.22 (s, 6H, 2 $\times$ OCH<sub>3</sub>), 2.66 (br s, 1H, OH), 1.31 (s, 12H, 4 $\times$ CH<sub>3</sub>) ppm.  $^{13}\text{C}$  NMR (126 MHz,  $\text{CDCl}_3$ )  $\delta$  158.8 (*i*-C<sub>Ar</sub>), 131.5 (*i*-C<sub>Ar</sub>), 129.3 (*o*-C<sub>Ar</sub>), 113.3 (*m*-C<sub>Ar</sub>), 99.6 (-OCO-), 99.1 (-OCO-), 75.7 (OCH<sub>2</sub>), 73.4 (C-2), 70.6 (C-5), 69.4 (C-4 & C-6), 69.1 (C-1 & C-3), 55.2 (OCH<sub>3</sub>(PMB)), 47.92 (2 $\times$ OCH<sub>3</sub>), 47.87 (2 $\times$ OCH<sub>3</sub>), 17.74 (2 $\times$ CH<sub>3</sub>), 17.67 (2 $\times$ CH<sub>3</sub>) ppm. HRMS (ESI) calcd. for  $\text{C}_{26}\text{H}_{40}\text{NaO}_{11}$  [M+Na]<sup>+</sup> 551.2463; found 551.2470.

**5-*O*-Benzyl-2-*O*-*p*-methoxybenzyl-1,6:3,4-bis-[O-(2,3-dimethoxybutane-2,3-diyl)]-*myo*-inositol (16b).** A solution of alcohol **16a** (265 mg, 0.5 mmol) in dry DMF (5 mL) was cooled to 0 °C under an Ar atmosphere. 90% NaH (20 mg, 0.7 mmol) was added in one portion and the resulting slurry was stirred at the same temperature for 1 h. Then, BnBr (95  $\mu\text{L}$ , 0.8 mmol)

was added dropwise and the mixture was stirred for 12 h, while it was left to warm up to room temperature. MeOH (0.1 mL) was added and the mixture was stirred at room temperature for 1 h. CH<sub>2</sub>Cl<sub>2</sub> (10 mL) was added and the resulting solution was washed with H<sub>2</sub>O (10 mL). The aqueous phase was back-extracted with CH<sub>2</sub>Cl<sub>2</sub> (10 mL) and the combined organic phases were washed with saturated brine (10 mL), dried over Na<sub>2</sub>SO<sub>4</sub>, and concentrated *in vacuo*. The residue was purified with flash column chromatography (hexanes/EtOAc 10:1 to 7:1) to give benzyl ether **16b** (278 mg, 90%) as a colorless thick oil. R<sub>f</sub> = 0.66 (hexanes/EtOAc 1:1). <sup>1</sup>H NMR (500 MHz, CDCl<sub>3</sub>) δ 7.45 (d, *J* = 8.4 Hz, 2H, 2×ArH<sub>PMB</sub>), 7.41 (d, *J* = 7.4 Hz, 2H, 2×ArH<sub>Bn</sub>), 7.31 (t, *J* = 7.4 Hz, 2H, 2×ArH<sub>Bn</sub>), 7.24 (t, *J* = 7.4 Hz, 1H, 1×ArH<sub>Bn</sub>), 6.86 (d, *J* = 8.4 Hz, 2H, 2×ArH<sub>PMB</sub>), 4.87 (s, 2H, CH<sub>2</sub>Ar<sub>Bn</sub>), 4.79 (s, 2H, CH<sub>2</sub>Ar<sub>PMB</sub>), 4.19 (t, *J* = 9.8 Hz, 2H, H-4 & H-6), 3.81 (s, 3H, CH<sub>3</sub>OAr), 3.80 (t, *J* = 1.7 Hz, 1H, H-2), 3.57 (dd, *J* = 10.5, 1.7 Hz, 2H, H-1 & H-3), 3.55 (t, *J* = 9.4 Hz, 1H, H-5), 3.27 (s, 6H, 2×OCH<sub>3</sub>), 3.25 (s, 6H, 2×OCH<sub>3</sub>), 1.34 (s, 6H, 2×CH<sub>3</sub>), 1.33 (s, 6H, 2×CH<sub>3</sub>) ppm. <sup>13</sup>C NMR (126 MHz, CDCl<sub>3</sub>) δ 156.7 (*i*-C<sub>Ar(PMB)</sub>), 139.6 (*i*-C<sub>Ar(Bn)</sub>), 131.5 (*i*-C<sub>Ar(PMB)</sub>), 129.4 (*o*-C<sub>Ar(PMB)</sub>), 128.0 (*m*-C<sub>Ar(Bn)</sub>), 127.4 (*o*-C<sub>Ar(Bn)</sub>), 127.1 (*p*-C<sub>Ar(Bn)</sub>), 113.2 (*m*-C<sub>Ar(PMB)</sub>), 99.6 (-OCO-), 99.0 (-OCO-), 78.8 (C-5), 75.6 (OCH<sub>2</sub>), 74.9 (OCH<sub>2</sub>), 73.4 (C-2), 70.0 (C-4 & C-6), 69.3 (C-1 & C-3), 55.2 (OCH<sub>3(PMB)</sub>), 47.9 (2×OCH<sub>3</sub>), 47.8 (2×OCH<sub>3</sub>), 17.9 (2×CH<sub>3</sub>), 17.7 (2×CH<sub>3</sub>) ppm. HRMS (ESI) calcd. for C<sub>33</sub>H<sub>46</sub>NaO<sub>11</sub> [M+Na]<sup>+</sup> 641.2932; found 641.2945.

**5-O-Benzyl-1,6:3,4-bis-[O-(2,3-dimethoxybutane-2,3-diyl)]-myo-inositol (16c).** DDQ (135 mg, 0.6 mmol) was added to a solution of PMP-ether **16b** (250 mg, 0.4 mmol) in CH<sub>2</sub>Cl<sub>2</sub> (10 mL) and H<sub>2</sub>O (1 mL). The mixture was stirred at 25 °C for 24 h. Then, CH<sub>2</sub>Cl<sub>2</sub> (40 mL) and a saturated aqueous NaHCO<sub>3</sub> solution (20 mL) were added and the resulting slurry was vigorously stirred at 25 °C for 30 min. The organic phase was further washed with a saturated aqueous NaHCO<sub>3</sub> solution (10 mL) and saturated brine (10 mL), dried over Na<sub>2</sub>SO<sub>4</sub>, and concentrated *in vacuo*. The residue was purified with flash column chromatography (hexanes/EtOAc 7:1 to 4:1) to give alcohol **16c** (140 mg, 71%) as a colorless thick oil. R<sub>f</sub> = 0.50 (hexanes/EtOAc 1:1). <sup>1</sup>H NMR (500 MHz, CDCl<sub>3</sub>) δ 7.41 (d, *J* = 7.4 Hz, 2H, 2×*o*-ArH), 7.31 (t, *J* = 7.4 Hz, 2H, 2×*m*-ArH), 7.24 (t, *J* = 7.4 Hz, 1H, *p*-ArH), 4.86 (s, 2H, CH<sub>2</sub>Ar), 4.12 (t, *J* = 9.9 Hz, 2H, H-4 & H-6), 4.02 (t, *J* = 2.4 Hz, 1H, H-2), 3.58 (dd, *J* = 10.4, 2.5 Hz, 2H, H-1 & H-3), 3.55 (t, *J* = 9.5 Hz, 1H, H-5), 3.27 (s, 6H, 2×OCH<sub>3</sub>), 3.26 (s, 6H, 2×OCH<sub>3</sub>), 2.43 (br s, 1H, OH), 1.34 (s, 6H, 2×CH<sub>3</sub>), 1.33 (s, 6H, 2×CH<sub>3</sub>) ppm. <sup>13</sup>C NMR (126 MHz, CDCl<sub>3</sub>) δ 139.5 (*i*-C<sub>Ar</sub>), 128.1 (*m*-C<sub>Ar</sub>), 127.4 (*o*-C<sub>Ar</sub>), 127.2 (*p*-C<sub>Ar</sub>), 100.0 (-OCO-), 99.2 (-OCO-), 78.2 (C-5), 74.9 (OCH<sub>2</sub>), 69.4 (C-4 & C-6), 68.9 (C-2), 68.7 (C-1 & C-3), 48.1 (2×OCH<sub>3</sub>), 47.9 (2×OCH<sub>3</sub>), 17.9 (2×CH<sub>3</sub>), 17.6 (2×CH<sub>3</sub>) ppm. HRMS (ESI) calcd. for C<sub>25</sub>H<sub>38</sub>NaO<sub>10</sub> [M+Na]<sup>+</sup> 521.2357; found 521.2361.

**5-O-Benzyl-2-O-butyryl-1,6:3,4-bis-[O-(2,3-dimethoxybutane-2,3-diyl)]-myo-inositol (16d).** Dry Et<sub>3</sub>N (85 μL, 0.6 mmol) and DMAP (12 mg, 0.1 mmol) were added to a solution of alcohol **16c** (150 mg, 0.3 mmol) in dry CH<sub>2</sub>Cl<sub>2</sub> (3 mL) under an Ar atmosphere at room temperature. Butyric anhydride (65 μL, 0.4 mmol) was added and the mixture was stirred at room temperature for 12 h. The reaction mixture was diluted with CH<sub>2</sub>Cl<sub>2</sub> (10 mL) and successively washed with saturated aqueous sodium bicarbonate solution (3×3 mL) and saturated brine (5 mL). The aqueous phase was back-extracted with CH<sub>2</sub>Cl<sub>2</sub> (10 mL) and the combined organic phases were dried over Na<sub>2</sub>SO<sub>4</sub> and concentrated *in vacuo*. The residue was purified with flash column chromatography (hexanes/EtOAc 10:1 to 7:1) to give butyrate **16d** (155 mg, 91%) as a white thick oil. R<sub>f</sub> = 0.69 (hexanes/EtOAc 1:1). <sup>1</sup>H NMR (500 MHz, CDCl<sub>3</sub>) δ 7.42 (d, *J* = 7.2 Hz, 2H, 2×*o*-ArH), 7.31 (t, *J* = 7.4 Hz, 2H, 2×*m*-ArH), 7.26 (t, *J* = 7.2 Hz, 1H, *p*-ArH), 5.41 (t, *J* = 2.5 Hz, 1H, H-2), 4.86 (s, 2H, CH<sub>2</sub>Ar), 4.03 (t, *J* = 9.9 Hz, 2H, H-4 & H-6), 3.66 (dd, *J* = 10.3, 2.6 Hz, 2H, H-1 & H-3), 3.58 (t, *J* = 9.4 Hz, 1H, H-5), 3.26 (s, 6H, 2×OCH<sub>3</sub>), 3.24 (s, 6H, 2×OCH<sub>3</sub>), 2.34 (t, *J* = 7.2 Hz, 2H, COCH<sub>2</sub>), 1.77–1.65 (m, 2H, CH<sub>2</sub>CH<sub>3</sub>), 1.32 (s, 6H, 2×CH<sub>3</sub>), 1.23 (s, 6H, 2×CH<sub>3</sub>), 0.98 (t, *J* = 7.4 Hz, 3H, CH<sub>2</sub>CH<sub>3</sub>) ppm. <sup>13</sup>C NMR (126 MHz, CDCl<sub>3</sub>) δ 172.9 (CO), 139.3 (*i*-C<sub>Ar</sub>), 128.1 (*m*-C<sub>Ar</sub>), 127.7 (*o*-C<sub>Ar</sub>), 127.4 (*p*-C<sub>Ar</sub>), 99.8 (-OCO-), 99.2 (-OCO-), 78.3 (C-5), 75.3 (OCH<sub>2</sub>), 70.0 (C-4 & C-6), 68.9 (C-2), 67.2 (C-1 & C-3), 48.1 (2×OCH<sub>3</sub>), 47.8 (2×OCH<sub>3</sub>), 36.8

(COCH<sub>2</sub>), 18.9 (CH<sub>2</sub>CH<sub>3</sub>), 17.8 (2×CH<sub>3</sub>), 17.4 (2×CH<sub>3</sub>), 13.5 (CH<sub>2</sub>CH<sub>3</sub>) ppm. HRMS (ESI) calcd. for C<sub>29</sub>H<sub>44</sub>NaO<sub>11</sub> [M+Na]<sup>+</sup> 591.2776; found 591.2789.

**5-O-Benzyl-2-O-butyryl-myo-inositol (17a).** Tetraol **17a** was prepared from bisacetal **16d**, according to General Procedure D. Yield: 100%. White amorphous solid. <sup>1</sup>H NMR (500 MHz, CD<sub>3</sub>OD) δ 7.44 (d, *J* = 7.3 Hz, 2H, 2×*o*-ArH), 7.31 (t, *J* = 7.4 Hz, 2H, 2×*m*-ArH), 7.24 (t, *J* = 7.3 Hz, 1H, *p*-ArH), 5.43 (t, *J* = 2.8 Hz, 1H, H-2), 4.88 (s, 2H, CH<sub>2</sub>Ar), 3.67 (t, *J* = 9.6 Hz, 2H, H-4 & H-6), 3.54 (dd, *J* = 9.9, 2.9 Hz, 2H, H-1 & H-3), 3.21 (t, *J* = 9.2 Hz, 1H, H-5), 2.36 (t, *J* = 7.4 Hz, 2H, COCH<sub>2</sub>), 1.83–1.53 (m, 2H, CH<sub>2</sub>CH<sub>3</sub>), 0.97 (t, *J* = 7.4 Hz, 3H, CH<sub>2</sub>CH<sub>3</sub>) ppm. <sup>13</sup>C NMR (126 MHz, CD<sub>3</sub>OD) δ 175.1 (CO), 140.5 (*i*-C<sub>Ar</sub>), 129.2 (*o*-C<sub>Ar</sub> & *m*-C<sub>Ar</sub>), 128.5 (*p*-C<sub>Ar</sub>), 85.1 (C-5), 76.2 (OCH<sub>2</sub>), 75.3 (C-2), 74.7 (C-4 & C-6), 71.8 (C-1 & C-2), 37.2 (COCH<sub>2</sub>), 19.5 (CH<sub>2</sub>CH<sub>3</sub>), 14.04 (CH<sub>2</sub>CH<sub>3</sub>) ppm. HRMS (ESI) calcd. for C<sub>17</sub>H<sub>24</sub>NaO<sub>7</sub> [M+Na]<sup>+</sup> 363.1414; found 363.1405.

**Octabenzyl 1,3,4,6-(5-O-benzyl-2-O-butyryl-myo-inositol) tetrakisphosphate (17b).** Benzyl phosphate **17b** was prepared from tetraol **17a**, according to General Procedure E. Yield: 63%. Colorless thick oil. R<sub>f</sub> = 0.57 (hexanes/EtOAc 1:2). <sup>1</sup>H NMR (500 MHz, CDCl<sub>3</sub>) δ 7.37 (d, *J* = 7.3 Hz, 2H, 2×ArH), 7.19–7.05 (m, 39H, 39×ArH), 6.88 (d, *J* = 7.2 Hz, 4H, 4×ArH), 6.07 (br s, 1H, H-2), 4.93–4.74 (m, 18H, 8×CH<sub>2</sub>Ph & H-4 & H-6), 4.53 (dd, *J* = 11.6, 9.4 Hz, 2H, CH<sub>2</sub>Ph), 4.34 (br t, *J* = 9.2 Hz, 2H, H-1 & H-3), 3.45 (t, *J* = 8.9 Hz, 1H, H-5), 2.23 (t, *J* = 7.4 Hz, 2H, COCH<sub>2</sub>), 1.62–1.42 (m, 2H, CH<sub>2</sub>CH<sub>3</sub>), 0.83 (t, *J* = 7.4 Hz, 3H, CH<sub>2</sub>CH<sub>3</sub>) ppm. <sup>13</sup>C NMR (126 MHz, CDCl<sub>3</sub>) δ 171.7 (CO), 137.9 (C-*i*Ar), 135.9 (d, <sup>3</sup>J<sub>CP</sub> = 7.1 Hz, 2×C-*i*Ar), 137.7–135.6 (m, 6×C-*i*Ar), 128.5, 128.4, 128.39, 128.32, 128.27, 128.20, 128.17, 128.13, 128.06, 128.00, 127.9, 127.8 (C-*o*Ar, C-*m*Ar, C-*p*Ar), 78.9 (C-5), 77.1 (br s, C-4 & C-6), 74.4 (CH<sub>2</sub>Ph), 73.6 (br s, C-1 & C-3), 67.0 (d, <sup>2</sup>J<sub>CP</sub> = 5.6 Hz, 2×CH<sub>2</sub>Ph), 69.6 (d, <sup>2</sup>J<sub>CP</sub> = 4.9 Hz, 2×CH<sub>2</sub>Ph), 69.5 (d, <sup>2</sup>J<sub>CP</sub> = 5.6 Hz, 2×CH<sub>2</sub>Ph), 69.3 (d, <sup>2</sup>J<sub>CP</sub> = 5.2 Hz, 2×CH<sub>2</sub>Ph), 69.2 (C-2), 35.8 (COCH<sub>2</sub>), 18.5 (CH<sub>2</sub>CH<sub>3</sub>), 13.5 (CH<sub>2</sub>CH<sub>3</sub>) ppm. <sup>31</sup>P NMR (202 MHz, CDCl<sub>3</sub>, <sup>31</sup>P-<sup>1</sup>H decoupled): -1.28 (2P), -1.83 (2P) ppm. HRMS (ESI) calcd. for C<sub>73</sub>H<sub>76</sub>NaO<sub>19</sub>P<sub>4</sub> [M+Na]<sup>+</sup> 1403.3823; found 1403.3819.

**Tetrasodium (2-O-butyryl-1,3,4,6-myo-inositol) tetrakisphosphate (4).** Phosphate **4** was prepared from benzyl phosphate **17b**, according to General Procedure F. Reaction time: 96 h. Yield: 100%. White amorphous solid. <sup>1</sup>H NMR (500 MHz, D<sub>2</sub>O) δ 5.53 (br s, 1H, H-2), 4.19 (q, <sup>3</sup>J<sub>HP</sub> = <sup>3</sup>J<sub>HH</sub> = 8.9 Hz, 2H, H-4 & H-6), 4.03 (br t, <sup>3</sup>J<sub>HP</sub> = <sup>3</sup>J<sub>HH</sub> = 8.9 Hz, 2H, H-1 & H-3), 3.54 (t, *J* = 8.8 Hz, 1H, H-5), 2.39 (t, *J* = 7.6 Hz, 2H, COCH<sub>2</sub>), 1.58–1.51 (m, 2H, CH<sub>2</sub>CH<sub>3</sub>), 0.83 (t, *J* = 7.4 Hz, 3H, CH<sub>2</sub>CH<sub>3</sub>) ppm. <sup>13</sup>C NMR (126 MHz, D<sub>2</sub>O) δ 176.0 (CO), 76.6 (C-4 & C-6), 74.0 (C-5), 73.5 (C-2), 71.9 (C-1 & C-3), 57.4 (COCH<sub>2</sub>), 17.8 (CH<sub>2</sub>CH<sub>3</sub>), 13.0 (CH<sub>2</sub>CH<sub>3</sub>) ppm. <sup>31</sup>P NMR (202 MHz, D<sub>2</sub>O, <sup>31</sup>P-<sup>1</sup>H decoupled): 0.05 (2P), 0.00 (2P) ppm. HRMS (ESI) calcd. for C<sub>10</sub>H<sub>18</sub>Na<sub>3</sub>O<sub>19</sub>P<sub>4</sub> [M-Na]<sup>-</sup> 634.9091; found 634.9101.

**2-O-benzyl-1,6:3,4-bis-[O-(2,3-dimethoxybutane-2,3-diyl)]-myo-inositol (21).** Benzyl ether **21** was prepared from diol **14** in 64% yield, following known procedures.<sup>54,55</sup>

**5-O-Acetyl-2-O-benzyl-1,6:3,4-bis-[O-(2,3-dimethoxybutane-2,3-diyl)]-myo-inositol (22).** This compound was isolated from the reaction of malonic acid with alcohol **21** in the presence of DIC/DMAP. Yield: 41%. Colorless thick oil. R<sub>f</sub> = 0.48 (hexanes/EtOAc 1:1). FTIR (KBr): 1765 cm<sup>-1</sup>. <sup>1</sup>H NMR (500 MHz, CDCl<sub>3</sub>) δ 7.53 (d, *J* = 7.1 Hz, 2H, 2×*o*-ArH), 7.33 (t, *J* = 7.4 Hz, 2H, 2×*m*-ArH), 7.26 (t, *J* = 7.3 Hz, 1H, *p*-ArH), 5.09 (t, *J* = 9.8 Hz, 1H, H-5), 4.86 (s, 2H, CH<sub>2</sub>Ph), 4.13 (t, *J* = 10.0 Hz, 2H, H-4 & H-6), 3.82 (t, *J* = 2.3 Hz, 1H, H-2), 3.61 (dd, *J* = 10.3, 2.4 Hz, 2H, H-1 & H-3), 3.21 (s, 6H, 2×OCH<sub>3</sub>), 3.20 (s, 6H, 2×OCH<sub>3</sub>), 2.06 (s, 3H, CH<sub>3</sub>CO), 1.30 (s, 6H, 2×CH<sub>3</sub>), 1.23 (s, 6H, 2×CH<sub>3</sub>) ppm. <sup>13</sup>C NMR (126 MHz, CDCl<sub>3</sub>) δ 169.7 (CO), 139.5 (*i*-C<sub>Ar</sub>), 127.8 (*m*-C<sub>Ar</sub>), 127.7 (*o*-C<sub>Ar</sub>), 127.0 (*p*-C<sub>Ar</sub>), 99.5 (-OCO-), 99.1 (-OCO-), 76.1 (C-2), 74.0 (CH<sub>2</sub>Ph), 70.9 (C-5), 69.1 (C-1 & C-3), 67.6 (C-4 & C-6), 47.8 (OCH<sub>3</sub>), 47.4 (OCH<sub>3</sub>), 20.8 (CH<sub>3</sub>CO), 17.7 (CH<sub>3</sub>), 17.6 (CH<sub>3</sub>) ppm. HRMS (ESI) calcd. for C<sub>27</sub>H<sub>40</sub>NaO<sub>11</sub> [M+Na]<sup>+</sup> 540.2571; found 540.2582.

**5,5'-Bis[2-O-benzyl-1,6:3,4-bis-O-(2,3-dimethoxybutane-2,3-diyl)-myo-inositol] malonate (23a).** Colorless thick oil. R<sub>f</sub> = 0.68 (hexanes/EtOAc 1:1). FTIR (KBr): 1765 cm<sup>-1</sup>. <sup>1</sup>H NMR (300 MHz, CDCl<sub>3</sub>) δ 7.51 (d, *J* = 7.0 Hz, 4H, 4×*o*-ArH), 7.34–7.22 (m, 6H, 4×*m*-ArH & 2×*p*-ArH), 5.08

(t,  $J = 9.8$  Hz, 2H, H-5), 4.83 (s, 4H,  $2 \times \text{CH}_2\text{Ph}$ ), 4.12 (t,  $J = 9.8$  Hz, 4H, H-4 & H-6), 3.79 (t,  $J = 2.3$  Hz, 2H, H-2), 3.59 (dd,  $J = 10.2, 2.3$  Hz, 4H, H-1 & H-3), 3.35 (s, 2H,  $\text{COCH}_2\text{CO}$ ), 3.20 (s, 12H,  $4 \times \text{OCH}_3$ ), 3.16 (s, 12H,  $4 \times \text{OCH}_3$ ), 1.27 (s, 12H,  $4 \times \text{CH}_3$ ), 1.19 (s, 12H,  $4 \times \text{CH}_3$ ) ppm.  $^{13}\text{C}$  NMR (75 MHz,  $\text{CDCl}_3$ )  $\delta$  164.8 (CO), 139.5 (*i*- $\text{C}_{\text{Ar}}$ ), 127.9 (*m*- $\text{C}_{\text{Ar}}$ ), 127.8 (*o*- $\text{C}_{\text{Ar}}$ ), 127.0 (*p*- $\text{C}_{\text{Ar}}$ ), 99.7 (-OCO-), 99.1 (-OCO-), 76.2 (C-2), 74.0 ( $\text{CH}_2\text{Ph}$ ), 72.1 (C-5), 69.1 (C-1 & C-3), 67.5 (C-4 & C-6), 47.8 ( $4 \times \text{OCH}_3$ ), 47.7 ( $4 \times \text{OCH}_3$ ), 41.3 ( $\text{COCH}_2\text{CO}$ ), 17.6 ( $4 \times \text{CH}_3$ ), 17.5 ( $4 \times \text{CH}_3$ ) ppm. HRMS (ESI) calcd. for  $\text{C}_{53}\text{H}_{76}\text{NaO}_{22}$   $[\text{M}+\text{Na}]^+$  1087.4720; found 1087.4738.

**5-[2-*O*-benzyl-1,6:3,4-bis-*O*-(2,3-dimethoxybutane-2,3-diyl)-*myo*-inositolyl]-3-(1,3-diisopropylureido)-3-oxopropanoate (24a).** Colorless thick oil.  $R_f = 0.40$  (hexanes/EtOAc 1:1).  $^1\text{H}$  NMR (300 MHz,  $\text{CDCl}_3$ )  $\delta$  7.51 (d,  $J = 7.1$  Hz, 2H,  $2 \times o\text{-ArH}$  & *p*-ArH), 7.35–7.23 (m, 3H,  $2 \times m\text{-ArH}$  & *p*-ArH), 5.13 (t,  $J = 9.8$  Hz, 1H, H-5), 4.85 (s, 2H,  $\text{CH}_2\text{Ph}$ ), 4.43–4.34 (m, 1H, CHN), 4.18 (t,  $J = 10.0$  Hz, 2H, H-4 & H-6), 3.94–3.89 (m, 1H, CHNH), 3.81 (t,  $J = 2.3$  Hz, 1H, H-2), 3.61 (dd,  $J = 10.3, 2.3$  Hz, 2H, H-1 & H-3), 3.51 (s, 2H,  $\text{COCH}_2$ ), 3.21 (s, 12H,  $4 \times \text{OCH}_3$ ), 1.64 (br s, 1H, NH), 1.35 (d,  $J = 6.8$  Hz, 6H,  $(\text{CH}_3)_2\text{CHN}$ ), 1.29 (s, 6H,  $2 \times \text{CH}_3$ ), 1.22 (s, 6H,  $2 \times \text{CH}_3$ ), 1.17 (d,  $J = 6.6$  Hz, 6H,  $(\text{CH}_3)_2\text{CHNH}$ ) ppm.  $^{13}\text{C}$  NMR (75 MHz,  $\text{CDCl}_3$ )  $\delta$  167.8 (OCO), 164.6 (NCO), 153.6 (NCONH), 139.5 (*i*- $\text{C}_{\text{Ar}}$ ), 127.9 (*m*- $\text{C}_{\text{Ar}}$ ), 127.7 (*o*- $\text{C}_{\text{Ar}}$ ), 127.1 (*p*- $\text{C}_{\text{Ar}}$ ), 99.7 (-OCO-), 99.2 (-OCO-), 76.1 (C-2), 74.1 ( $\text{CH}_2\text{Ph}$ ), 72.8 (C-5), 69.1 (C-1 & C-3), 67.4 (C-4 & C-6), 48.3 (CHNH), 47.9 ( $\text{OCH}_3$ ), 47.7 ( $\text{OCH}_3$ ), 43.6 (CHN), 43.1 ( $\text{COCH}_2$ ), 22.1 [ $(\text{CH}_3)_2\text{CHNH}$ ], 20.5 [ $(\text{CH}_3)_2\text{CHN}$ ], 17.7 ( $\text{CH}_3$ ), 17.6 ( $\text{CH}_3$ ) ppm. HRMS (ESI) calcd. for  $\text{C}_{35}\text{H}_{54}\text{N}_2\text{NaO}_{13}$   $[\text{M}+\text{Na}]^+$  733.3518; found 733.3521.

**5-[2-*O*-benzyl-1,6:3,4-bis-*O*-(2,3-dimethoxybutane-2,3-diyl)-*myo*-inositolyl]-3-(1,3-dicyclohexylureido)-3-oxopropanoate (24b).** This compound was isolated from the reaction of malonic acid with alcohol **21** in the presence of DCC (12% yield). Colorless thick oil.  $R_f = 0.68$  (hexanes/EtOAc 1:1).  $^1\text{H}$  NMR (300 MHz,  $\text{CDCl}_3$ )  $\delta$  7.51 (d,  $J = 7.2$  Hz, 2H,  $2 \times o\text{-ArH}$ ), 7.35–7.23 (m, 3H,  $2 \times m\text{-ArH}$  & *p*-ArH), 5.11 (t,  $J = 9.7$  Hz, 1H, H-5), 4.85 (s, 2H,  $\text{CH}_2\text{Ph}$ ), 4.18 (t,  $J = 10.0$  Hz, 2H, H-4 & H-6), 4.06–3.97 (m, 1H, CHN), 3.81 (t,  $J = 2.2$  Hz, 1H, H-2), 3.67–3.58 (m, 1H, CHN), 3.60 (dd,  $J = 10.2, 2.3$  Hz, 2H, H-1 & H-3), 3.48 (s, 2H,  $\text{COCH}_2$ ), 3.21 (s, 12H,  $4 \times \text{OCH}_3$ ), 2.05–1.53 (m, 21H,  $10 \times \text{CH}_{2\text{cyclohex}}$  & NH), 1.29 (s, 6H,  $2 \times \text{CH}_3$ ), 1.22 (s, 6H,  $2 \times \text{CH}_3$ ) ppm.  $^{13}\text{C}$  NMR (75 MHz,  $\text{CDCl}_3$ )  $\delta$  168.1 (OCO), 161.8 (NCO), 153.7 (NCONH), 139.5 (*i*- $\text{C}_{\text{Ar}}$ ), 127.9 (*m*- $\text{C}_{\text{Ar}}$ ), 127.7 (*o*- $\text{C}_{\text{Ar}}$ ), 127.1 (*p*- $\text{C}_{\text{Ar}}$ ), 99.7 (-OCO-), 99.2 (-OCO-), 76.1 (C-2), 74.0 ( $\text{CH}_2\text{Ph}$ ), 72.9 (C-5), 69.1 (C-1 & C-3), 67.5 (C-4 & C-6), 50.2 (CHN), 47.9 ( $\text{OCH}_3$ ), 47.8 (CHNH), 47.7 ( $\text{OCH}_3$ ), 43.2 ( $\text{COCH}_2$ ), 34.0, 32.8, 32.3, 30.6, 29.7, 26.5, 26.1, 25.4, 24.9, 24.7 ( $\text{C}_{\text{cyclohex}}$ ), 17.7 ( $\text{CH}_3$ ), 17.6 ( $\text{CH}_3$ ) ppm. HRMS (ESI) calcd. for  $\text{C}_{41}\text{H}_{62}\text{N}_2\text{NaO}_{13}$   $[\text{M}+\text{Na}]^+$  813.4144; found 813.4131.

**5,5'-Bis[2-*O*-benzyl-1,6:3,4-bis-*O*-(2,3-dimethoxybutane-2,3-diyl)-*myo*-inositolyl] succinate (23b).** Colorless thick oil.  $R_f = 0.47$  (hexanes/EtOAc 1:1). FTIR (KBr):  $1754\text{ cm}^{-1}$ .  $^1\text{H}$  NMR (300 MHz,  $\text{CDCl}_3$ )  $\delta$  7.52 (d,  $J = 7.0$  Hz, 4H,  $4 \times o\text{-ArH}$ ), 7.35–7.22 (m, 6H,  $4 \times m\text{-ArH}$  &  $2 \times p\text{-ArH}$ ), 5.08 (t,  $J = 9.8$  Hz, 2H, H-5), 4.84 (s, 4H,  $2 \times \text{CH}_2\text{Ph}$ ), 4.12 (t,  $J = 10.0$  Hz, 4H, H-4 & H-6), 3.80 (t,  $J = 2.3$  Hz, 2H, H-2), 3.59 (dd,  $J = 10.3, 2.3$  Hz, 4H, H-1 & H-3), 3.20 (s, 12H,  $4 \times \text{OCH}_3$ ), 3.17 (s, 12H,  $4 \times \text{OCH}_3$ ), 2.65 (s, 4H,  $\text{COCH}_2\text{CH}_2\text{CO}$ ), 1.28 (s, 12H,  $4 \times \text{CH}_3$ ), 1.21 (s, 12H,  $4 \times \text{CH}_3$ ) ppm.  $^{13}\text{C}$  NMR (75 MHz,  $\text{CDCl}_3$ )  $\delta$  170.8 (CO), 139.6 (*i*- $\text{C}_{\text{Ar}}$ ), 127.9 (*m*- $\text{C}_{\text{Ar}}$ ), 127.7 (*o*- $\text{C}_{\text{Ar}}$ ), 127.0 (*p*- $\text{C}_{\text{Ar}}$ ), 99.7 (-OCO-), 99.1 (-OCO-), 76.3 (C-2), 74.0 ( $\text{CH}_2\text{Ph}$ ), 71.4 (C-5), 69.2 (C-1 & C-3), 67.6 (C-4 & C-6), 47.8 ( $\text{OCH}_3$ ), 47.5 ( $\text{OCH}_3$ ), 29.4 ( $\text{COCH}_2$ ), 17.7 ( $\text{CH}_3$ ), 17.6 ( $\text{CH}_3$ ) ppm. HRMS (ESI) calcd. for  $\text{C}_{54}\text{H}_{78}\text{NaO}_{22}$   $[\text{M}+\text{Na}]^+$  1101.4877; found 1101.4888.

**5-[2-*O*-benzyl-1,6:3,4-bis-*O*-(2,3-dimethoxybutane-2,3-diyl)-*myo*-inositolyl]-3-(1,3-dicyclohexylureido)-4-oxobutanoate (24c).** This compound was isolated from the reaction of succinic acid with alcohol **21** in the presence of DCC/DMAP. Yield: 28%. Colorless thick oil.  $R_f = 0.47$  (hexanes/EtOAc 1:1).  $^1\text{H}$  NMR (300 MHz,  $\text{CDCl}_3$ )  $\delta$  7.51 (d,  $J = 7.2$  Hz, 2H,  $2 \times o\text{-ArH}$ ), 7.35–7.22 (m, 3H,  $2 \times m\text{-ArH}$  & *p*-ArH), 5.07 (t,  $J = 9.0$  Hz, 1H, H-5), 4.84 (s, 2H,  $\text{CH}_2\text{Ph}$ ), 4.15 (t,  $J = 9.0$  Hz, 2H, H-4 & H-6), 4.09–4.01 (m, 1H, CHN), 3.80 (t,  $J = 2.2$  Hz, 1H, H-2), 3.59 (dd,  $J = 9.0, 3.0$  Hz, 2H, H-1 & H-3), 3.52–3.45 (m, 1H, CHN), 3.22 (s, 6H,  $2 \times \text{OCH}_3$ ), 3.21 (s, 6H,  $2 \times \text{OCH}_3$ ), 2.74 (t,  $J = 6.0$  Hz, 2H,  $\text{COCH}_2$ ), 2.65 (t,  $J = 6.0$  Hz, 2H,  $\text{COCH}_2$ ), 1.96–1.92 (m, 4H,



4×CHH<sub>cyclohex</sub>), 1.80-1.59 (m, 17H, 16×CHH<sub>cyclohex</sub> & NH), 1.29 (s, 6H, 2×CH<sub>3</sub>), 1.23 (s, 6H, 2×CH<sub>3</sub>) ppm. <sup>13</sup>C NMR (75 MHz, CDCl<sub>3</sub>) δ 172.5 (OCO), 154.2 (NCO), 149.1 (NCONH), 139.6 (*i*-C<sub>Ar</sub>), 127.9 (*m*-C<sub>Ar</sub>), 127.7 (*o*-C<sub>Ar</sub>), 127.0 (*p*-C<sub>Ar</sub>), 99.7 (-OCO-), 99.2 (-OCO-), 76.2 (C-2), 74.0 (CH<sub>2</sub>Ph), 71.6 (C-5), 69.2 (C-1 & C-3), 67.6 (C-4 & C-6), 50.1 (CHN), 47.9 (OCH<sub>3</sub>), 47.7 (OCH<sub>3</sub>), 47.5 (CHNH), (COCH<sub>2</sub>), 34.0, 32.5, 30.7, 29.6, 26.2, 25.7, 25.5, 25.4, 24.9, 24.8 (C<sub>cyclohex</sub> & 2×COCH<sub>2</sub>), 17.7 (CH<sub>3</sub>), 17.6 (CH<sub>3</sub>) ppm. HRMS (ESI) calcd. for C<sub>42</sub>H<sub>64</sub>N<sub>2</sub>NaO<sub>13</sub> [M+Na]<sup>+</sup> 827.4301; found 827.4309.

**5O,5'O-(Butane-1,4-diyl)bis[2-O-benzyl-1,6:3,4-bis-O-(2,3-dimethoxybutane-2,3-diyl)-myo-inositol] (25a).** Prepared from alcohol **21** and **26**<sup>56</sup> according to General Procedure A. Yield: 45%. White thick oil. R<sub>f</sub> = 0.24 (hexanes/EtOAc 1:1). <sup>1</sup>H NMR (300 MHz, CDCl<sub>3</sub>) δ 7.49 (d, *J* = 7.0 Hz, 4H, 4×*o*-ArH), 7.32–7.20 (m, 6H, 4×*m*-ArH & 2×*p*-ArH), 4.82 (s, 4H, 2×CH<sub>2</sub>Ph), 4.05 (t, *J* = 9.8 Hz, 4H, H-4 & H-6), 3.78–3.75 (m, 6H, H-2 & 2×OCH<sub>2</sub>CH<sub>2</sub>), 3.51 (dd, *J* = 10.3, 2.3 Hz, 4H, H-1 & H-3), 3.28 (t, *J* = 9.3 Hz, 2H, H-5), 3.23 (s, 12H, 4×OCH<sub>3</sub>), 3.21 (s, 12H, 4×OCH<sub>3</sub>), 1.63 (m, 4H, 2×OCH<sub>2</sub>CH<sub>2</sub>), 1.29 (s, 12H, 4×CH<sub>3</sub>), 1.26 (s, 12H, 4×CH<sub>3</sub>) ppm. <sup>13</sup>C NMR (75 MHz, CDCl<sub>3</sub>) δ 139.7 (*i*-C<sub>Ar</sub>), 127.8 (*m*-C<sub>Ar</sub>), 127.7 (*o*-C<sub>Ar</sub>), 126.8 (*p*-C<sub>Ar</sub>), 99.6 (-OCO-), 98.9 (-OCO-), 78.4 (C-5), 76.3 (C-2), 73.7 (CH<sub>2</sub>Ph), 72.6 (OCH<sub>2</sub>CH<sub>2</sub>), 69.9 (C-4 & C-6), 69.4 (C-1 & C-3), 47.8 (OCH<sub>3</sub>), 47.7 (OCH<sub>3</sub>), 26.8 (OCH<sub>2</sub>CH<sub>2</sub>), 17.8 (CH<sub>3</sub>), 17.6 (CH<sub>3</sub>) ppm. HRMS (ESI) calcd. for C<sub>54</sub>H<sub>82</sub>NaO<sub>20</sub> [M+Na]<sup>+</sup> 1073.5292; found 1073.5294.

**5O,5'O-(Pentane-1,5-diyl)bis[2-O-benzyl-1,6:3,4-bis-O-(2,3-dimethoxybutane-2,3-diyl)-myo-inositol] (25b).** Prepared from alcohol **21** and **27**<sup>57</sup> according to General Procedure A. Yield: 62%. White thick oil. R<sub>f</sub> = 0.21 (hexanes/EtOAc 1:1). <sup>1</sup>H NMR (300 MHz, CDCl<sub>3</sub>) δ 7.49 (d, *J* = 7.0 Hz, 4H, 4×*o*-ArH), 7.32–7.22 (m, 6H, 4×*m*-ArH & 2×*p*-ArH), 4.83 (s, 4H, 2×CH<sub>2</sub>Ph), 4.05 (t, *J* = 9.9 Hz, 4H, H-4 & H-6), 3.75 (t, *J* = 2.2 Hz, 2H, H-2), 3.73 (t, *J* = 6.3 Hz, 4H, 2×OCH<sub>2</sub>CH<sub>2</sub>), 3.51 (dd, *J* = 10.4, 2.3 Hz, 4H, H-1 & H-3), 3.28 (t, *J* = 9.3 Hz, 2H, H-5), 3.24 (s, 12H, 4×OCH<sub>3</sub>), 3.21 (s, 12H, 4×OCH<sub>3</sub>), 1.61–1.51 (m, 4H, 2×OCH<sub>2</sub>CH<sub>2</sub>), 1.47–1.40 (m, 2H, OCH<sub>2</sub>CH<sub>2</sub>CH<sub>2</sub>), 1.29 (s, 12H, 4×CH<sub>3</sub>), 1.26 (s, 12H, 4×CH<sub>3</sub>) ppm. <sup>13</sup>C NMR (75 MHz, CDCl<sub>3</sub>) δ 139.5 (*i*-C<sub>Ar</sub>), 127.8 (*m*-C<sub>Ar</sub>), 127.7 (*o*-C<sub>Ar</sub>), 126.8 (*p*-C<sub>Ar</sub>), 99.5 (-OCO-), 98.9 (-OCO-), 78.3 (C-5), 76.1 (C-2), 73.7 (CH<sub>2</sub>Ph), 72.8 (OCH<sub>2</sub>CH<sub>2</sub>), 69.8 (C-4 & C-6), 69.3 (C-1 & C-3), 47.8 (OCH<sub>3</sub>), 47.7 (OCH<sub>3</sub>), 29.9 (OCH<sub>2</sub>CH<sub>2</sub>), 22.2 (OCH<sub>2</sub>CH<sub>2</sub>CH<sub>2</sub>), 17.8 (CH<sub>3</sub>), 17.6 (CH<sub>3</sub>) ppm. HRMS (ESI) calcd. for C<sub>55</sub>H<sub>84</sub>NaO<sub>20</sub> [M+Na]<sup>+</sup> 1087.5448; found 1087.5459.

**5,5'-Bis[1,6:3,4-bis-O-(2,3-dimethoxybutane-2,3-diyl)-myo-inositolyl] malonate (28a).** Prepared from dibenzyl ether **23a** according to General Procedure B. Yield: 100%. White amorphous solid. R<sub>f</sub> = 0.15 (hexanes/EtOAc 1:2). FTIR (KBr): 3441, 1800 cm<sup>-1</sup>. <sup>1</sup>H NMR (300 MHz, CDCl<sub>3</sub>) δ 5.11 (t, *J* = 9.9 Hz, 2H, H-5), 4.10 (t, *J* = 10.0 Hz, 4H, H-4 & H-6), 4.03 (t, *J* = 2.5 Hz, 2H, H-2), 3.62 (dd, *J* = 10.2, 2.5 Hz, 4H, H-1 & H-3), 3.39 (s, 2H, CH<sub>2</sub>), 3.23 (s, 12H, 4×OCH<sub>3</sub>), 3.20 (s, 12H, 4×OCH<sub>3</sub>), 2.33 (br s, 2H, 2×OH), 1.31 (s, 12H, 4×CH<sub>3</sub>), 1.23 (s, 12H, 4×CH<sub>3</sub>) ppm. <sup>13</sup>C NMR (75 MHz, CDCl<sub>3</sub>) δ 164.8 (CO), 100.1 (-OCO-), 99.3 (-OCO-), 71.6 (C-5), 68.9 (C-2), 68.5 (C-1 & C-3), 66.9 (C-4 & C-6), 47.9 (4×OCH<sub>3</sub>), 47.7 (4×OCH<sub>3</sub>), 41.2 (COCH<sub>2</sub>CO), 17.63 (4×CH<sub>3</sub>), 17.56 (4×CH<sub>3</sub>) ppm. HRMS (ESI) calcd. for C<sub>39</sub>H<sub>64</sub>NaO<sub>22</sub> [M+Na]<sup>+</sup> 907.3781; found 907.3788.

**5,5'-Bis[1,6:3,4-bis-O-(2,3-dimethoxybutane-2,3-diyl)-myo-inositolyl] succinate (28b).** Prepared from dibenzyl ether **23b** according to General Procedure B. Yield: 100%. White amorphous solid. R<sub>f</sub> = 0.09 (hexanes/EtOAc 1:1). FTIR (KBr): 3483, 1754 cm<sup>-1</sup>. <sup>1</sup>H NMR (300 MHz, CDCl<sub>3</sub>) δ 5.10 (t, *J* = 9.9 Hz, 2H, H-5), 4.09 (t, *J* = 10.0 Hz, 4H, H-4 & H-6), 4.03 (t, *J* = 2.5 Hz, 2H, H-2), 3.62 (dd, *J* = 10.2, 2.6 Hz, 4H, H-1 & H-3), 3.23 (s, 12H, 4×OCH<sub>3</sub>), 3.20 (s, 12H, 4×OCH<sub>3</sub>), 2.68 (s, 4H, 2×CH<sub>2</sub>), 2.38 (s, 2H, 2×OH), 1.31 (s, 12H, 4×CH<sub>3</sub>), 1.23 (s, 12H, 4×CH<sub>3</sub>) ppm. <sup>13</sup>C NMR (75 MHz, CDCl<sub>3</sub>) δ 170.8 (CO), 100.1 (-OCO-), 99.3 (-OCO-), 70.8 (C-5), 68.9 (C-2), 68.6 (C-1 & C-3), 67.0 (C-4 & C-6), 47.9 (4×OCH<sub>3</sub>), 47.6 (4×OCH<sub>3</sub>), 29.2 (COCH<sub>2</sub>), 17.63 (4×CH<sub>3</sub>), 17.56 (4×CH<sub>3</sub>) ppm. HRMS (ESI) calcd. for C<sub>40</sub>H<sub>66</sub>NaO<sub>22</sub> [M+Na]<sup>+</sup> 921.3938; found 921.3928.

**5O,5'O-(Butane-1,4-diyl)bis[1,6:3,4-bis-O-(2,3-dimethoxybutane-2,3-diyl)-myo-inositol]**

**(28c).** Prepared from dibenzyl ether **25a** according to General Procedure B. Yield: 93%. White amorphous solid.  $R_f = 0.08$  (hexanes/EtOAc 1:1). FTIR (KBr): 3448, 1038  $\text{cm}^{-1}$ .  $^1\text{H}$  NMR (500 MHz,  $\text{CDCl}_3$ )  $\delta$  3.98 (t, 4H, H-4 & H-6), 3.98 (2H, H-2, obscured), 3.77 (br s, 4H,  $2\times\text{OCH}_2$ ), 3.53 (dd,  $J = 10.3, 2.5$  Hz, 4H, H-1 & H-3), 3.31 (t,  $J = 9.4$  Hz, 2H, H-5), 3.25 (s, 24H,  $8\times\text{OCH}_3$ ), 2.32 (br s, 2H,  $2\times\text{OH}$ ), 1.64 (br s, 4H,  $2\times\text{OCH}_2\text{CH}_2$ ), 1.32 (s, 12H,  $4\times\text{CH}_3$ ), 1.28 (s, 12H,  $4\times\text{CH}_3$ ) ppm.  $^{13}\text{C}$  NMR (126 MHz,  $\text{CDCl}_3$ )  $\delta$  100.0 (-OCO-), 99.1 (-OCO-), 77.7 (C-5), 72.5 ( $\text{OCH}_2$ ), 69.4 (C-4 & C-6), 69.0 (C-2), 68.7 (C-1 & C-3), 48.0 ( $4\times\text{OCH}_3$ ), 47.7 ( $4\times\text{OCH}_3$ ), 26.7 ( $\text{OCH}_2\text{CH}_2$ ), 17.8 ( $4\times\text{CH}_3$ ), 17.6 ( $4\times\text{CH}_3$ ) ppm. HRMS (ESI) calcd. for  $\text{C}_{40}\text{H}_{70}\text{NaO}_{20}$   $[\text{M}+\text{Na}]^+$  893.4353; found 893.4348.

**5O,5'O-(Pentane-1,5-diyl)bis[1,6:3,4-bis-O-(2,3-dimethoxybutane-2,3-diyl)-myo-inositol]**

**(28d).** Prepared from dibenzyl ether **25b** according to General Procedure B. Yield: 96%. White amorphous solid.  $R_f = 0.08$  (hexanes/EtOAc 1:1). FTIR (KBr): 3450, 1037  $\text{cm}^{-1}$ .  $^1\text{H}$  NMR (500 MHz,  $\text{CDCl}_3$ )  $\delta$  3.99 (t,  $J = 9.9$  Hz, 4H, H-4 & H-6), 3.99 (2H, H-2, obscured), 3.72 (t,  $J = 6.3$  Hz, 4H,  $2\times\text{OCH}_2$ ), 3.52 (dd,  $J = 10.3, 2.5$  Hz, 4H, H-1 & H-3), 3.30 (t,  $J = 9.5$  Hz, 2H, H-5), 3.25 (s, 12H,  $4\times\text{OCH}_3$ ), 3.24 (s, 12H,  $4\times\text{OCH}_3$ ), 1.80 (br s, 2H,  $2\times\text{OH}$ ), 1.57–1.52 (m, 4H,  $2\times\text{OCH}_2\text{CH}_2$ ), 1.46–1.41 (m, 2H,  $\text{OCH}_2\text{CH}_2\text{CH}_2$ ), 1.31 (s, 12H,  $4\times\text{CH}_3$ ), 1.27 (s, 12H,  $4\times\text{CH}_3$ ) ppm.  $^{13}\text{C}$  NMR (126 MHz,  $\text{CDCl}_3$ )  $\delta$  99.9 (-OCO-), 99.1 (-OCO-), 77.7 (C-5), 72.8 ( $\text{OCH}_2$ ), 69.3 (C-4 & C-6), 68.9 (C-2), 68.7 (C-1 & C-3), 48.0 ( $4\times\text{OCH}_3$ ), 47.7 ( $4\times\text{OCH}_3$ ), 29.9 ( $\text{OCH}_2\text{CH}_2$ ), 22.2 ( $\text{OCH}_2\text{CH}_2\text{CH}_2$ ), 17.8 ( $4\times\text{CH}_3$ ), 17.6 ( $4\times\text{CH}_3$ ) ppm. HRMS (ESI) calcd. for  $\text{C}_{41}\text{H}_{72}\text{NaO}_{20}$   $[\text{M}+\text{Na}]^+$  907.4509; found 907.4500.

**5,5'-Bis[2-O-buteryl-1,6:3,4-bis-O-(2,3-dimethoxybutane-2,3-diyl)-myo-inositol] malonate**

**(29a).** Prepared from diol **28a** according to General Procedure C. Yield: 79%. White solid. m.p. 170.2–172.2  $^\circ\text{C}$ .  $R_f = 0.39$  (hexanes/EtOAc 1:1). FTIR (KBr): 1752  $\text{cm}^{-1}$ .  $^1\text{H}$  NMR (300 MHz,  $\text{CDCl}_3$ )  $\delta$  5.43 (t,  $J = 2.6$  Hz, 2H, H-2), 5.12 (t,  $J = 9.9$  Hz, 2H, H-5), 3.99 (t,  $J = 10.1$  Hz, 4H, H-4 & H-6), 3.70 (dd,  $J = 10.2, 2.7$  Hz, 4H, H-1 & H-3), 3.42 (s, 2H,  $\text{COCH}_2\text{CO}$ ), 3.21 (s, 12H,  $4\times\text{OCH}_3$ ), 3.20 (s, 12H,  $4\times\text{OCH}_3$ ), 2.37 (t,  $J = 7.2$  Hz, 4H,  $2\times\text{COCH}_2$ ), 1.77–1.64 (m, 4H,  $2\times\text{COCH}_2\text{CH}_2$ ), 1.22 (s, 12H,  $4\times\text{CH}_3$ ), 1.20 (s, 12H,  $4\times\text{CH}_3$ ), 1.00 (t,  $J = 7.4$  Hz, 6H,  $2\times\text{CH}_2\text{CH}_3$ ) ppm.  $^{13}\text{C}$  NMR (75 MHz,  $\text{CDCl}_3$ )  $\delta$  172.6 ( $\text{CO}_{\text{but}}$ ), 164.7 ( $\text{CO}_{\text{mal}}$ ), 99.9 (-OCO-), 99.3 (-OCO-), 71.6 (C-5), 68.6 (C-2), 67.5 (C-4 & C-6), 67.0 (C-1 & C-3), 48.0 ( $4\times\text{OCH}_3$ ), 47.6 ( $4\times\text{OCH}_3$ ), 41.1 ( $\text{COCH}_2\text{CO}$ ), 36.7 ( $\text{COCH}_2$ ), 18.8 ( $\text{COCH}_2\text{CH}_2$ ), 17.6 ( $4\times\text{CH}_3$ ), 17.4 ( $4\times\text{CH}_3$ ), 13.5 ( $\text{CH}_2\text{CH}_3$ ) ppm. HRMS (ESI) calcd. for  $\text{C}_{47}\text{H}_{76}\text{NaO}_{24}$   $[\text{M}+\text{Na}]^+$  1047.4619; found 1047.4601.

**5,5'-Bis[2-O-buteryl-1,6:3,4-bis-O-(2,3-dimethoxybutane-2,3-diyl)-myo-inositol] succinate**

**(29b).** Prepared from diol **28b** according to General Procedure C. Yield: 97%. White solid. m.p. 242.4–243.5  $^\circ\text{C}$ .  $R_f = 0.64$  (hexanes/EtOAc 1:1). FTIR (KBr): 1753, 1742  $\text{cm}^{-1}$ .  $^1\text{H}$  NMR (300 MHz,  $\text{CDCl}_3$ )  $\delta$  5.43 (t,  $J = 2.7$  Hz, 2H, H-2), 5.11 (t,  $J = 9.9$  Hz, 2H, H-5), 3.97 (t,  $J = 10.1$  Hz, 4H, H-4 & H-6), 3.69 (dd,  $J = 10.2, 2.7$  Hz, 4H, H-1 & H-3), 3.21 (s, 12H,  $4\times\text{OCH}_3$ ), 3.20 (s, 12H,  $4\times\text{OCH}_3$ ), 2.69 (s, 4H,  $\text{COCH}_2\text{CH}_2\text{CO}$ ), 2.38 (t,  $J = 7.2$  Hz, 4H,  $2\times\text{COCH}_2$ ), 1.78–1.66 (m, 4H,  $2\times\text{COCH}_2\text{CH}_2$ ), 1.20 (s, 12H,  $4\times\text{CH}_3$ ), 1.20 (s, 12H,  $4\times\text{CH}_3$ ), 1.01 (t,  $J = 7.4$  Hz, 6H,  $2\times\text{CH}_2\text{CH}_3$ ) ppm.  $^{13}\text{C}$  NMR (75 MHz,  $\text{CDCl}_3$ )  $\delta$  172.6 ( $\text{CO}_{\text{but}}$ ), 170.8 ( $\text{CO}_{\text{suc}}$ ), 99.8 (-OCO-), 99.3 (-OCO-), 70.8 (C-5), 68.6 (C-2), 67.6 (C-4 & C-6), 67.1 (C-1 & C-3), 47.9 ( $4\times\text{OCH}_3$ ), 47.5 ( $4\times\text{OCH}_3$ ), 36.7 ( $\text{COCH}_2$ ), 29.1 ( $\text{COCH}_2\text{CH}_2\text{CO}$ ), 18.8 ( $\text{COCH}_2\text{CH}_2$ ), 17.6 ( $4\times\text{CH}_3$ ), 17.4 ( $4\times\text{CH}_3$ ), 13.5 ( $\text{CH}_2\text{CH}_3$ ) ppm. HRMS (ESI) calcd. for  $\text{C}_{48}\text{H}_{78}\text{NaO}_{24}$   $[\text{M}+\text{Na}]^+$  1061.4775; found 1061.4786.

**5O,5'O-(Butane-1,4-diyl)bis[2-O-buteryl-1,6:3,4-bis-O-(2,3-dimethoxybutane-2,3-diyl)-myo-inositol]**

**(29c).** Prepared from diol **28c** according to General Procedure C. Yield: 87%. White solid. m.p. 195.3  $^\circ\text{C}$ .  $R_f = 0.66$  (hexanes/EtOAc 1:1). FTIR (KBr): 1740, 1039  $\text{cm}^{-1}$ .  $^1\text{H}$  NMR (500 MHz,  $\text{CDCl}_3$ )  $\delta$  5.38 (t,  $J = 2.7$  Hz, 2H, H-2), 3.88 (t,  $J = 9.9$  Hz, 4H, H-4 & H-6), 3.79 (br s, 4H,  $2\times\text{OCH}_2$ ), 3.60 (dd,  $J = 10.3, 2.7$  Hz, 4H, H-1 & H-3), 3.33 (t,  $J = 9.4$  Hz, 2H, H-5), 3.23 (s, 12H,  $4\times\text{OCH}_3$ ), 3.22 (s, 12H,  $4\times\text{OCH}_3$ ), 2.34 (t,  $J = 7.2$  Hz, 4H,  $2\times\text{COCH}_2$ ), 1.73–1.67 (m, 4H,  $2\times\text{COCH}_2\text{CH}_2$ ), 1.66 (br s, 4H,  $2\times\text{OCH}_2\text{CH}_2$ ), 1.25 (s, 12H,  $4\times\text{CH}_3$ ), 1.20 (s, 12H,  $4\times\text{CH}_3$ ), 0.98 (t,  $J = 7.4$  Hz, 6H,  $2\times\text{CH}_2\text{CH}_3$ ) ppm.  $^{13}\text{C}$  NMR (126 MHz,  $\text{CDCl}_3$ )  $\delta$  172.9 (CO), 99.7 (-OCO-), 99.1 (-

OCO-), 77.6 (C-5), 72.6 (OCH<sub>2</sub>), 69.9 (C-4 & C-6), 68.9 (C-2), 67.2 (C-1 & C-3), 48.0 (4×OCH<sub>3</sub>), 47.7 (4×OCH<sub>3</sub>), 36.8 (COCH<sub>2</sub>), 26.6 (OCH<sub>2</sub>CH<sub>2</sub>), 18.9 (COCH<sub>2</sub>CH<sub>2</sub>), 17.8 (4×CH<sub>3</sub>), 17.4 (4×CH<sub>3</sub>), 13.5 (CH<sub>2</sub>CH<sub>3</sub>) ppm. HRMS (ESI) calcd. for C<sub>48</sub>H<sub>82</sub>NaO<sub>22</sub> [M+Na]<sup>+</sup> 1033.5190; found 1033.5203.

**5O,5'O-(Pentane-1,5-diyl)bis[2-O-butyryl-1,6:3,4-bis-O-(2,3-dimethoxybutane-2,3-diyl)-myo-inositol] (29d)**. Prepared from diol **28d** according to General Procedure C. Yield: 79%. White solid. m.p. 213-214 °C. R<sub>f</sub> = 0.59 (hexanes/EtOAc 1:1). FTIR (KBr): 1754, 1039 cm<sup>-1</sup>. <sup>1</sup>H NMR (500 MHz, CDCl<sub>3</sub>) δ 5.39 (t, *J* = 2.7 Hz, 2H, H-2), 3.90 (t, *J* = 9.9 Hz, 4H, H-4 & H-6), 3.76 (t, *J* = 6.4 Hz, 4H, 2×OCH<sub>2</sub>), 3.62 (dd, *J* = 10.3, 2.7 Hz, 4H, H-1 & H-3), 3.34 (t, *J* = 9.4 Hz, 2H, H-5), 3.25 (s, 12H, 4×OCH<sub>3</sub>), 3.23 (s, 12H, 4×OCH<sub>3</sub>), 2.35 (t, *J* = 7.2 Hz, 4H, 2×COCH<sub>2</sub>), 1.74–1.66 (m, 4H, 2×COCH<sub>2</sub>CH<sub>2</sub>), 1.61–1.55 (m, 4H, 2×OCH<sub>2</sub>CH<sub>2</sub>), 1.50–1.44 (m, 2H, OCH<sub>2</sub>CH<sub>2</sub>CH<sub>2</sub>), 1.26 (s, 12H, 4×CH<sub>3</sub>), 1.21 (s, 12H, 4×CH<sub>3</sub>), 0.99 (t, *J* = 7.4 Hz, 6H, 2×CH<sub>2</sub>CH<sub>3</sub>) ppm. <sup>13</sup>C NMR (126 MHz, CDCl<sub>3</sub>) δ 172.9 (CO), 99.7 (-OCO-), 99.0 (-OCO-), 77.8 (C-5), 72.9 (OCH<sub>2</sub>), 69.9 (C-4 & C-6), 68.9 (C-2), 67.1 (C-1 & C-3), 48.0 (4×OCH<sub>3</sub>), 47.7 (4×OCH<sub>3</sub>), 36.8 (COCH<sub>2</sub>), 29.9 (OCH<sub>2</sub>CH<sub>2</sub>), 22.1 (OCH<sub>2</sub>CH<sub>2</sub>CH<sub>2</sub>), 18.9 (COCH<sub>2</sub>CH<sub>2</sub>), 17.8 (4×CH<sub>3</sub>), 17.4 (4×CH<sub>3</sub>), 13.5 (CH<sub>2</sub>CH<sub>3</sub>) ppm. HRMS (ESI) calcd. for C<sub>49</sub>H<sub>84</sub>NaO<sub>22</sub> [M+Na]<sup>+</sup> 1047.5346; found 1047.5333.

**5,5'-Bis(2-O-butyryl-myoinositol) malonate (30a)**. Prepared from tetrakisacetal **29a** according to General Procedure D. Yield: 100%. White solid. <sup>1</sup>H NMR (500 MHz, CD<sub>3</sub>OD) δ 5.46 (t, *J* = 2.6 Hz, 2H, H-2), 4.85 (t, *J* = 9.1 Hz, 2H, H-5), 3.67 (t, *J* = 9.9 Hz, 4H, H-4 & H-6), 3.63 (dd, *J* = 9.9, 2.8 Hz, 4H, H-1 & H-3), 3.61 (s, 2H, COCH<sub>2</sub>CO), 2.38 (t, *J* = 7.4 Hz, 4H, 2×COCH<sub>2</sub>), 1.70–1.62 (m, 4H, 2×COCH<sub>2</sub>CH<sub>2</sub>), 0.98 (t, *J* = 7.4 Hz, 6H, 2×CH<sub>3</sub>) ppm. <sup>13</sup>C NMR (126 MHz, CD<sub>3</sub>OD) δ 174.8 (CO<sub>but</sub>), 168.0 (CO<sub>mal</sub>), 78.9 (C-5), 75.0 (C-2), 72.5 (C-4 & C-6), 71.3 (C-1 & C-3), 42.9 (COCH<sub>2</sub>CO), 37.1 (COCH<sub>2</sub>), 19.4 (COCH<sub>2</sub>CH<sub>2</sub>), 14.0 (CH<sub>3</sub>) ppm. HRMS (ESI) calcd. for C<sub>23</sub>H<sub>36</sub>NaO<sub>16</sub> [M+Na]<sup>+</sup> 591.1896; found 591.1891.

**5,5'-Bis(myoinositol) malonate (30b)**. Prepared from tetrakisacetal **28a** according to General Procedure D. Yield: 100%. White solid. <sup>1</sup>H NMR (500 MHz, D<sub>2</sub>O) δ 4.85 (t, *J* = 9.6 Hz, 2H, H-5), 4.09 (br s, 2H, H-2), 3.80 (t, *J* = 9.9 Hz, 4H, H-4 & H-6), 3.76 (s, 2H, CH<sub>2</sub>), 3.64 (dd, *J* = 10.1, 2.9 Hz, 4H, H-1 & H-3) ppm. <sup>13</sup>C NMR (126 MHz, D<sub>2</sub>O) δ 168.0 (CO), 77.3 (C-5), 71.8 (C-2), 70.8 (C-4 & C-6), 70.3 (C-1 & C-3), 41.2 (CH<sub>2</sub>) ppm. HRMS (ESI) calcd. for C<sub>15</sub>H<sub>24</sub>NaO<sub>14</sub> [M+Na]<sup>+</sup> 451.1058; found 451.1060.

**5,5'-Bis(2-O-butyryl-myoinositol) succinate (30c)**. Prepared from tetrakisacetal **29b** according to General Procedure D. Yield: 100%. White solid. <sup>1</sup>H NMR (500 MHz, CD<sub>3</sub>OD) δ 5.46 (t, *J* = 2.8 Hz, 2H, H-2), 4.82 (t, *J* = 9.3 Hz, 2H, H-5), 3.66 (t, *J* = 9.8 Hz, 4H, H-4 & H-6), 3.61 (dd, *J* = 9.9, 2.8 Hz, 4H, H-1 & H-3), 2.78 (s, 4H, COCH<sub>2</sub>CH<sub>2</sub>CO), 2.39 (t, *J* = 7.4 Hz, 4H, 2×COCH<sub>2</sub>), 1.70–1.63 (m, 4H, 2×COCH<sub>2</sub>CH<sub>2</sub>), 0.99 (t, *J* = 7.4 Hz, 6H, 2×CH<sub>3</sub>) ppm. <sup>13</sup>C NMR (126 MHz, CD<sub>3</sub>OD) δ 174.9 (CO<sub>but</sub>), 174.0 (CO<sub>suc</sub>), 78.1 (C-5), 75.1 (C-2), 72.7 (C-4 & C-6), 71.5 (C-1 & C-3), 37.1 (COCH<sub>2</sub>), 30.5 (COCH<sub>2</sub>CH<sub>2</sub>CO), 19.4 (COCH<sub>2</sub>CH<sub>2</sub>), 14.0 (CH<sub>3</sub>) ppm. HRMS (ESI) calcd. for C<sub>24</sub>H<sub>38</sub>NaO<sub>16</sub> [M+Na]<sup>+</sup> 605.2052; found 605.2041.

**5,5'-Bis(myoinositol) succinate (30d)**. Prepared from tetrakisacetal **28b** according to General Procedure D. Yield: 98%. White solid. <sup>1</sup>H NMR (500 MHz, D<sub>2</sub>O) δ 4.78 (2H, H-5, obscured), 4.05 (t, *J* = 2.7 Hz, 2H, H-2), 3.75 (t, *J* = 9.9 Hz, 4H, H-4 & H-6), 3.59 (dd, *J* = 10.1, 2.8 Hz, 4H, H-1 & H-3), 2.81 (s, 4H, COCH<sub>2</sub>CH<sub>2</sub>CO) ppm. <sup>13</sup>C NMR (126 MHz, D<sub>2</sub>O) δ 174.4 (CO), 76.5 (C-5), 71.9 (C-2), 70.9 (C-1 & C-3), 70.5 (C-4 & C-6), 28.9 (COCH<sub>2</sub>) ppm. HRMS (ESI) calcd. for C<sub>16</sub>H<sub>26</sub>NaO<sub>14</sub> [M+Na]<sup>+</sup> 465.1215; found 465.1227.

**5O,5'O-(Butane-1,4-diyl)bis(2-O-butyryl-myoinositol) (30e)**. Prepared from tetrakisacetal **29c** according to General Procedure D. Yield: 99%. White solid. <sup>1</sup>H NMR (500 MHz, D<sub>2</sub>O) δ 5.38 (t, *J* = 2.6 Hz, 2H, H-2), 3.79 (br s, 4H, 2×OCH<sub>2</sub>), 3.66 (dd, *J* = 10.0, 2.7 Hz, 4H, H-1 & H-3), 3.62 (t, *J* = 10.0 Hz, 4H, H-4 & H-6), 3.14 (t, *J* = 9.0 Hz, 2H, H-5), 2.40 (t, *J* = 7.4 Hz, 4H, 2×COCH<sub>2</sub>), 1.66 (br s, 4H, 2×OCH<sub>2</sub>CH<sub>2</sub>), 1.62–1.55 (m, 4H, 2×COCH<sub>2</sub>CH<sub>2</sub>), 0.88 (t, *J* = 7.4 Hz, 6H, 2×CH<sub>3</sub>) ppm. <sup>13</sup>C NMR (75 MHz, D<sub>2</sub>O) δ 176.3 (CO), 82.9 (C-5), 73.9 (C-2), 72.8 (OCH<sub>2</sub>), 72.3 (C-1 & C-3), 69.7 (C-4 & C-6), 35.8 (COCH<sub>2</sub>), 25.9 (OCH<sub>2</sub>CH<sub>2</sub>), 17.9 (COCH<sub>2</sub>CH<sub>2</sub>), 12.8 (CH<sub>3</sub>) ppm. HRMS (ESI) calcd. for C<sub>24</sub>H<sub>42</sub>NaO<sub>14</sub> [M+Na]<sup>+</sup> 577.2467; found 577.2477.

**5O,5'O-(Butane-1,4-diyl)bis(myo-inositol) (30f).** Prepared from tetrakisacetal **28c** according to General Procedure D. Yield: 98%. White solid.  $^1\text{H}$  NMR (500 MHz,  $\text{D}_2\text{O}$ )  $\delta$  3.99 (t,  $J$  = 2.8 Hz, 2H, H-2), 3.78 (br t,  $J$  = 6.1 Hz, 4H,  $2\times\text{OCH}_2$ ), 3.63 (t,  $J$  = 9.8 Hz, 4H, H-4 & H-6), 3.48 (dd,  $J$  = 10.0, 2.9 Hz, 4H, H-1 & H-3), 3.09 (t,  $J$  = 9.5 Hz, 2H, H-5), 1.65 (br t,  $J$  = 6.2 Hz, 4H,  $2\times\text{OCH}_2\text{CH}_2$ ) ppm.  $^{13}\text{C}$  NMR (126 MHz,  $\text{D}_2\text{O}$ )  $\delta$  82.9 (C-5), 72.6 ( $\text{OCH}_2$ ), 71.8 (C-4 & C-6), 71.7 (C-2), 71.0 (C-1 & C-3), 25.7 ( $\text{OCH}_2\text{CH}_2$ ) ppm. HRMS (ESI) calcd. for  $\text{C}_{16}\text{H}_{30}\text{NaO}_{12}$   $[\text{M}+\text{Na}]^+$  437.1629; found 437.1641.

**5O,5'O-(Pentane-1,5-diyl)bis(2-O-butyryl-myo-inositol) (30g).** Prepared from tetrakisacetal **29d** according to General Procedure D. Yield: 99%. White solid.  $^1\text{H}$  NMR (500 MHz,  $\text{D}_2\text{O}$ )  $\delta$  5.45 (t,  $J$  = 2.6 Hz, 2H, H-2), 3.84 (t,  $J$  = 6.6 Hz, 4H,  $2\times\text{OCH}_2$ ), 3.73 (dd,  $J$  = 10.0, 2.5 Hz, 4H, H-1 & H-3), 3.68 (t,  $J$  = 10.0 Hz, 4H, H-4 & H-6), 2.47 (t,  $J$  = 7.4 Hz, 4H,  $2\times\text{COCH}_2$ ), 1.70–1.62 (m, 8H,  $2\times\text{COCH}_2\text{CH}_2$  &  $2\times\text{OCH}_2\text{CH}_2$ ), 1.50–1.43 (m, 2H,  $\text{OCH}_2\text{CH}_2\text{CH}_2$ ), 1.19 (t,  $J$  = 7.1 Hz, 6H,  $2\times\text{CH}_3$ ) ppm.  $^{13}\text{C}$  NMR (75 MHz,  $\text{D}_2\text{O}$ )  $\delta$  176.3 (CO), 82.8 (C-5), 73.9 (C-2), 73.0 ( $\text{OCH}_2$ ), 72.3 (C-1 & C-3), 69.7 (C-4 & C-6), 35.8 ( $\text{COCH}_2$ ), 29.0 ( $\text{OCH}_2\text{CH}_2$ ), 21.6 ( $\text{OCH}_2\text{CH}_2\text{CH}_2$ ), 17.9 ( $\text{COCH}_2\text{CH}_2$ ), 12.8 ( $\text{CH}_3$ ) ppm. HRMS (ESI) calcd. for  $\text{C}_{25}\text{H}_{44}\text{NaO}_{14}$   $[\text{M}+\text{Na}]^+$  591.2623; found 591.2626.

**5O,5'O-(Pentane-1,5-diyl)bis(myo-inositol) (30h).** Prepared from tetrakisacetal **28d** according to General Procedure D. Yield: 99%. White solid.  $^1\text{H}$  NMR (500 MHz,  $\text{D}_2\text{O}$ )  $\delta$  4.02 (t,  $J$  = 2.9 Hz, 2H, H-2), 3.78 (t,  $J$  = 6.8 Hz, 4H,  $2\times\text{OCH}_2$ ), 3.65 (t,  $J$  = 9.7 Hz, 4H, H-4 & H-6), 3.51 (dd,  $J$  = 10.0, 2.9 Hz, 4H, H-1 & H-3), 3.11 (t,  $J$  = 9.5 Hz, 2H, H-5), 1.66–1.60 (m, 4H,  $2\times\text{OCH}_2\text{CH}_2$ ), 1.45–1.39 (m, 2H,  $\text{OCH}_2\text{CH}_2\text{CH}_2$ ) ppm.  $^{13}\text{C}$  NMR (126 MHz,  $\text{D}_2\text{O}$ )  $\delta$  82.9 (C-5), 72.9 ( $\text{OCH}_2$ ), 71.9 (C-4 & C-6), 71.8 (C-2), 71.0 (C-1 & C-3), 28.9 ( $\text{OCH}_2\text{CH}_2$ ), 21.6 ( $\text{OCH}_2\text{CH}_2\text{CH}_2$ ) ppm. HRMS (ESI) calcd. for  $\text{C}_{17}\text{H}_{32}\text{NaO}_{12}$   $[\text{M}+\text{Na}]^+$  451.1786; found 451.1799.

**5,5'-Bis[2-O-butyryl-1,3,4,6-O-tetrakis(bis(benzyloxy)phosphoryl)-myo-inositolyl] malonate (31a).** Prepared from decaol **30a** according to General Procedure E. Yield: 61%. Colorless thick oil.  $R_f$  = 0.18 (hexanes/EtOAc 1:1).  $^1\text{H}$  NMR (300 MHz,  $\text{CDCl}_3$ )  $\delta$  7.25–7.13 (m, 80H,  $16\times\text{CH}_2\text{Ph}$ ), 6.12 (br s, 2H, H-2), 5.23 (t,  $J$  = 9.5 Hz, 2H, H-5), 5.11–4.88 (m, 32H,  $16\times\text{CH}_2\text{Ph}$ ), 4.78 (q,  $^3J_{\text{HP}} = ^3J_{\text{HH}} = 9.6$  Hz, 4H, H-4 & H-6), 4.33 (br td,  $^3J_{\text{HH}} = ^3J_{\text{HP}} = 9.7$  Hz,  $^3J_{\text{HH}} = 2.2$  Hz, 4H, H-1 & H-3), 4.10 (s, 2H,  $\text{COCH}_2\text{CO}$ ), 2.24 (t,  $J$  = 7.4 Hz, 4H,  $2\times\text{COCH}_2$ ), 1.63–1.50 (m, 4H,  $2\times\text{COCH}_2\text{CH}_2$ ), 0.88 (t,  $J$  = 7.4 Hz, 6H,  $2\times\text{CH}_3$ ) ppm.  $^{13}\text{C}$  NMR (126 MHz,  $\text{CDCl}_3$ )  $\delta$  171.4 ( $\text{CO}_{\text{but}}$ ), 166.0 ( $\text{CO}_{\text{mal}}$ ), 135.9 (d,  $^3J_{\text{CP}} = 6.0$  Hz,  $4\times\text{C-}i\text{Ar}$ ), 135.7 (d,  $^3J_{\text{CP}} = 7.5$  Hz,  $4\times\text{C-}i\text{Ar}$ ), 135.5 (d,  $^3J_{\text{CP}} = 7.3$  Hz,  $4\times\text{C-}i\text{Ar}$ ), 135.4 (d,  $^3J_{\text{CP}} = 6.9$  Hz,  $4\times\text{C-}i\text{Ar}$ ), 128.35, 128.29, 128.28, 128.22, 128.14, 128.12, 128.0, 127.9, 127.8, 127.7 (C-*oAr*, C-*mAr*, C-*pAr*), 75.0 (br t,  $^2J_{\text{CP}} = 6.3$  Hz, C-4 & C-6), 73.3 (t,  $^2J_{\text{CP}} = 4.6$  Hz, C-1 & C-3), 70.9 (br s, C-5), 69.8 (d,  $^2J_{\text{CP}} = 5.6$  Hz,  $4\times\text{CH}_2\text{Ph}$ ), 69.7 (d,  $^2J_{\text{CP}} = 5.6$  Hz,  $4\times\text{CH}_2\text{Ph}$ ), 69.4 (d,  $^2J_{\text{CP}} = 5.3$  Hz,  $4\times\text{CH}_2\text{Ph}$ ), 69.3 (d,  $^2J_{\text{CP}} = 5.5$  Hz,  $4\times\text{CH}_2\text{Ph}$ ), 69.1 (br s, C-2), 39.6 ( $\text{COCH}_2\text{CO}$ ), 35.6 ( $\text{COCH}_2$ ), 18.3 ( $\text{COCH}_2\text{CH}_2$ ), 13.4 ( $\text{CH}_3$ ) ppm.  $^{31}\text{P}$  NMR (121 MHz,  $\text{CDCl}_3$ ,  $^{31}\text{P-}^1\text{H}$  decoupled): -1.25 (4P), -1.78 (4P) ppm. HRMS (ESI) calcd. for  $\text{C}_{135}\text{H}_{140}\text{NaO}_{40}\text{P}_8$   $[\text{M}+\text{Na}]^+$  2671.6714; found 2671.6699.

**5,5'-Bis[1,2,3,4,6-O-pentakis(bis(benzyloxy)phosphoryl)-myo-inositolyl] malonate (31b).** Prepared from decaol **30b** according to General Procedure E. Yield: 78%. White thick oil.  $R_f$  = 0.50 (hexanes/EtOAc 1:2).  $^1\text{H}$  NMR (500 MHz,  $\text{CDCl}_3$ )  $\delta$  7.26–7.01 (m, 100H,  $20\times\text{CH}_2\text{Ph}$ ), 5.59 (br d,  $^3J_{\text{HP}} = 8.8$  Hz, 2H, H-2), 5.26 (t,  $J$  = 9.6 Hz, 2H, H-5), 5.15 (dd,  $^2J_{\text{HH}} = 11.7$  Hz,  $^3J_{\text{HP}} = 6.3$  Hz, 4H,  $2\times\text{CH}_2\text{Ph}$ ), 5.07–4.79 (m, 40H, H-4 & H-6 &  $18\times\text{CH}_2\text{Ph}$ ), 4.32 (br t,  $^3J_{\text{HP}} = ^3J_{\text{HH}} = 9.5$  Hz, 4H, H-1 & H-3), 4.06 (s, 2H,  $\text{CH}_2$ ) ppm.  $^{13}\text{C}$  NMR (126 MHz,  $\text{CDCl}_3$ )  $\delta$  166.0 (CO), 135.9 (d,  $^3J_{\text{CP}} = 5.8$  Hz,  $4\times\text{C-}i\text{Ar}$ ), 135.7 (d,  $^3J_{\text{CP}} = 7.2$  Hz,  $4\times\text{C-}i\text{Ar}$ ), 135.64 (d,  $^3J_{\text{CP}} = 8.1$  Hz,  $4\times\text{C-}i\text{Ar}$ ), 135.58 (d,  $^3J_{\text{CP}} = 6.7$  Hz,  $4\times\text{C-}i\text{Ar}$ ), 135.5 (d,  $^3J_{\text{CP}} = 6.8$  Hz,  $4\times\text{C-}i\text{Ar}$ ), 128.42, 128.38, 128.33, 128.31, 128.24, 128.19, 128.1, 128.0, 127.9 (C-*oAr*, C-*mAr*, C-*pAr*), 76.1 (br d,  $^2J_{\text{CP}} = 4.7$  Hz, C-2), 74.6 (br t,  $^2J_{\text{CP}} = 5.7$  Hz, C-4 & C-6), 73.6 (br s, C-1 & C-3), 70.9 (br s, C-5), 70.0 (d,  $^2J_{\text{CP}} = 5.6$  Hz,  $4\times\text{CH}_2\text{Ph}$ ), 69.8 (d,  $^2J_{\text{CP}} = 5.6$  Hz,  $4\times\text{CH}_2\text{Ph}$ ), 69.7 (d,  $^2J_{\text{CP}} = 5.8$  Hz,  $4\times\text{CH}_2\text{Ph}$ ), 69.8 (d,  $^2J_{\text{CP}} = 6.2$  Hz,  $4\times\text{CH}_2\text{Ph}$ ), 69.6 (d,  $^2J_{\text{CP}} = 5.6$  Hz,  $4\times\text{CH}_2\text{Ph}$ ), 39.7 ( $\text{CH}_2$ ) ppm.  $^{31}\text{P}$  NMR (121 MHz,  $\text{CDCl}_3$ ,  $^{31}\text{P-}^1\text{H}$

decoupled): -0.91 (4P), -1.58 (4P), -2.30 (2P) ppm. HRMS (ESI) calcd. for C<sub>155</sub>H<sub>154</sub>NaO<sub>44</sub>P<sub>10</sub> [M+Na]<sup>+</sup> 3051.7081; found 3051.7102.

**5,5'-Bis[2-O-butyryl-1,3,4,6-O-tetrakis(bis(benzyloxy)phosphoryl)-myo-inositol] succinate (31c).** Prepared from decaol **30c** according to General Procedure E. Yield: 75%. Colorless thick oil. R<sub>f</sub> = 0.18 (hexanes/EtOAc 1:1). <sup>1</sup>H NMR (500 MHz, CDCl<sub>3</sub>) δ 7.26–7.12 (m, 80H, 16×CH<sub>2</sub>Ph), 6.12 (br s, 2H, H-2), 5.14 (t, J = 9.4 Hz, 2H, H-5), 4.99–4.89 (m, 32H, 16×CH<sub>2</sub>Ph), 4.79 (q, <sup>3</sup>J<sub>HP</sub> = <sup>3</sup>J<sub>HH</sub> = 9.4 Hz, 4H, H-4 & H-6), 4.33 (td, <sup>3</sup>J<sub>HP</sub> = <sup>3</sup>J<sub>HH</sub> = 9.3 Hz, <sup>3</sup>J<sub>HH</sub> = 2.5 Hz, 4H, H-1 & H-3), 2.92 (s, 4H, COCH<sub>2</sub>CH<sub>2</sub>CO), 2.24 (t, J = 7.4 Hz, 4H, 2×COCH<sub>2</sub>), 1.60–1.52 (m, 4H, 2×COCH<sub>2</sub>CH<sub>2</sub>), 0.88 (t, J = 7.4 Hz, 6H, 2×CH<sub>3</sub>) ppm. <sup>13</sup>C NMR (126 MHz, CDCl<sub>3</sub>) δ 171.8 (CO<sub>but</sub>), 171.5 (CO<sub>suc</sub>), 135.72 (d, <sup>3</sup>J<sub>CP</sub> = 7.2 Hz, 4×C-*i*Ar), 135.66 (d, <sup>3</sup>J<sub>CP</sub> = 6.3 Hz, 4×C-*i*Ar), 135.49 (d, <sup>3</sup>J<sub>CP</sub> = 7.2 Hz, 4×C-*i*Ar), 135.48 (d, <sup>3</sup>J<sub>CP</sub> = 6.9 Hz, 4×C-*i*Ar), 128.39, 128.33, 128.28, 128.24, 128.22, 128.10, 128.06, 127.94, 127.86, 127.76 (C-*o*Ar, C-*m*Ar, C-*p*Ar), 75.2 (br t, <sup>2</sup>J<sub>CP</sub> = 6.5 Hz, C-4 & C-6), 73.3 (br t, <sup>2</sup>J<sub>CP</sub> = 4.8 Hz, C-1 & C-3), 70.6 (br s, C-5), 69.74 (d, <sup>2</sup>J<sub>CP</sub> = 5.6 Hz, 4×CH<sub>2</sub>Ph), 69.67 (d, <sup>2</sup>J<sub>CP</sub> = 5.7 Hz, 4×CH<sub>2</sub>Ph), 69.5 (d, <sup>2</sup>J<sub>CP</sub> = 5.4 Hz, 4×CH<sub>2</sub>Ph), 69.4 (d, <sup>2</sup>J<sub>CP</sub> = 5.7 Hz, 4×CH<sub>2</sub>Ph), 69.1 (br s, C-2), 35.7 (COCH<sub>2</sub>), 28.8 (COCH<sub>2</sub>CH<sub>2</sub>CO) 18.4 (COCH<sub>2</sub>CH<sub>2</sub>), 13.4 (CH<sub>3</sub>) ppm. <sup>31</sup>P NMR (121 MHz, CDCl<sub>3</sub>, <sup>31</sup>P-<sup>1</sup>H decoupled): -1.50 (4P), -1.76 (4P) ppm. HRMS (ESI) calcd. for C<sub>136</sub>H<sub>142</sub>NaO<sub>40</sub>P<sub>8</sub> [M+Na]<sup>+</sup> 2685.6871; found 2685.6876.

**5,5'-Bis[1,2,3,4,6-O-pentakis(bis(benzyloxy)phosphoryl)-myo-inositol] succinate (31d).** Prepared from decaol **30d** according to General Procedure E. Yield: 72%. White thick oil. R<sub>f</sub> = 0.11 (hexanes/EtOAc 1:1). <sup>1</sup>H NMR (500 MHz, CDCl<sub>3</sub>) δ 7.28–7.07 (m, 100H, 20×CH<sub>2</sub>Ph), 5.60 (br d, <sup>3</sup>J<sub>HP</sub> = 8.0 Hz, 2H, H-2), 5.15 (dd, <sup>2</sup>J<sub>HH</sub> = 11.3 Hz, <sup>3</sup>J<sub>HP</sub> = 4.9 Hz, 4H, 2×CH<sub>2</sub>Ph), 5.15 (2H, H-5, obscured), 5.06–4.89 (m, 36H, 18×CH<sub>2</sub>Ph), 4.86 (q, <sup>3</sup>J<sub>HP</sub> = <sup>3</sup>J<sub>HH</sub> = 9.5 Hz, 4H, H-4 & H-6), 4.34 (t, <sup>3</sup>J<sub>HP</sub> = <sup>3</sup>J<sub>HH</sub> = 9.0 Hz, 4H, H-1 & H-3), 2.88 (s, 4H, COCH<sub>2</sub>CH<sub>2</sub>CO) ppm. <sup>13</sup>C NMR (126 MHz, CDCl<sub>3</sub>) δ 171.8 (CO), 135.68 (d, <sup>3</sup>J<sub>CP</sub> = 5.0 Hz, 4×C-*i*Ar), 135.68 (d, <sup>3</sup>J<sub>CP</sub> = 5.9 Hz, 4×C-*i*Ar), 135.62 (d, <sup>3</sup>J<sub>CP</sub> = 6.0 Hz, 4×C-*i*Ar), 135.54 (d, <sup>3</sup>J<sub>CP</sub> = 7.3 Hz, 4×C-*i*Ar), 135.52 (d, <sup>3</sup>J<sub>CP</sub> = 6.9 Hz, 4×C-*i*Ar), 128.42, 128.39, 128.36, 128.31, 128.30, 128.28, 128.18, 128.12, 128.11, 128.09, 128.06, 127.84, 127.80 (C-*o*Ar, C-*m*Ar, C-*p*Ar), 76.1 (br d, <sup>3</sup>J<sub>CP</sub> = 5.0 Hz, C-2), 74.8 (br t, <sup>2</sup>J<sub>CP</sub> = 6.1 Hz, C-4 & C-6), 73.6 (br s, C-1 & C-3), 70.6 (br s, C-5), 70.0 (d, <sup>2</sup>J<sub>CP</sub> = 5.6 Hz, 4×CH<sub>2</sub>Ph), 69.8 (d, <sup>2</sup>J<sub>CP</sub> = 5.3 Hz, 8×CH<sub>2</sub>Ph), 69.7 (d, <sup>2</sup>J<sub>CP</sub> = 5.7 Hz, 4×CH<sub>2</sub>Ph), 69.6 (d, <sup>2</sup>J<sub>CP</sub> = 5.6 Hz, 4×CH<sub>2</sub>Ph), 28.8 (CH<sub>2</sub>) ppm. <sup>31</sup>P NMR (121 MHz, CDCl<sub>3</sub>, <sup>31</sup>P-<sup>1</sup>H decoupled): -1.07 (4P), -1.54 (4P), -2.38 (2P) ppm. HRMS (ESI) calcd. for C<sub>156</sub>H<sub>156</sub>NaO<sub>44</sub>P<sub>10</sub> [M+Na]<sup>+</sup> 3065.7238; found 3065.7221.

**5O,5'O-(Butane-1,4-diyl)bis[2-O-butyryl-1,2,3,4,6-O-tetrakis(bis(benzyloxy)phosphoryl)myo-inositol] (31e).** Prepared from decaol **30e** according to General Procedure E. Yield: 76%. Colorless thick oil. R<sub>f</sub> = 0.14 (hexanes/EtOAc 1:2). <sup>1</sup>H NMR (300 MHz, CDCl<sub>3</sub>) δ 7.30–7.20 (m, 80H, 16×CH<sub>2</sub>Ph), 6.10 (br s, 2H, H-2), 5.05–4.92 (m, 32H, 16×CH<sub>2</sub>Ph), 4.70 (q, <sup>3</sup>J<sub>HP</sub> = <sup>3</sup>J<sub>HH</sub> = 9.5 Hz, 4H, H-4 & H-6), 4.27 (td, <sup>3</sup>J<sub>HP</sub> = <sup>3</sup>J<sub>HH</sub> = 9.2 Hz, <sup>3</sup>J<sub>HH</sub> = 2.3 Hz, 4H, H-1 & H-3), 3.48 (br s, 4H, 2×OCH<sub>2</sub>), 2.97 (t, J = 9.4 Hz, 2H, H-5), 2.19 (t, J = 7.4 Hz, 4H, 2×COCH<sub>2</sub>), 1.59–1.47 (m, 4H, 2×COCH<sub>2</sub>CH<sub>2</sub>), 1.47 (br s, 4H, 2×OCH<sub>2</sub>CH<sub>2</sub>), 0.86 (t, J = 7.4 Hz, 6H, 2×CH<sub>3</sub>) ppm. <sup>13</sup>C NMR (75 MHz, CDCl<sub>3</sub>) δ 171.7 (CO), 136.0 (d, <sup>3</sup>J<sub>CP</sub> = 7.3 Hz, 4×C-*i*Ar), 135.9 (d, <sup>3</sup>J<sub>CP</sub> = 6.8 Hz, 4×C-*i*Ar), 135.7 (d, <sup>3</sup>J<sub>CP</sub> = 5.6 Hz, 4×C-*i*Ar), 135.6 (d, <sup>3</sup>J<sub>CP</sub> = 5.9 Hz, 4×C-*i*Ar), 128.55, 128.49, 128.44, 128.39, 128.28, 128.11, 128.05, 127.9 (C-*o*Ar, C-*m*Ar, C-*p*Ar), 78.9 (br s, C-5), 77.3 (br t, <sup>2</sup>J<sub>CP</sub> = 6.3 Hz, C-4 & C-6), 74.0 (OCH<sub>2</sub>), 73.6 (br s, C-1 & C-3), 69.9 (d, <sup>2</sup>J<sub>CP</sub> = 5.7 Hz, 4×CH<sub>2</sub>Ph), 69.5 (d, <sup>2</sup>J<sub>CP</sub> = 5.3 Hz, 4×CH<sub>2</sub>Ph), 69.5 (d, <sup>2</sup>J<sub>CP</sub> = 5.5 Hz, 4×CH<sub>2</sub>Ph), 69.3 (d, <sup>2</sup>J<sub>CP</sub> = 5.2 Hz, 4×CH<sub>2</sub>Ph), 69.2 (br s, C-2), 35.8 (COCH<sub>2</sub>), 25.4 (OCH<sub>2</sub>CH<sub>2</sub>), 18.5 (COCH<sub>2</sub>CH<sub>2</sub>), 13.5 (CH<sub>3</sub>) ppm. <sup>31</sup>P NMR (121 MHz, CDCl<sub>3</sub>, <sup>31</sup>P-<sup>1</sup>H decoupled): -1.13 (4P), -1.65 (4P) ppm. HRMS (ESI) calcd. for C<sub>136</sub>H<sub>146</sub>NaO<sub>38</sub>P<sub>8</sub> [M+Na]<sup>+</sup> 2657.7285; found 2657.7302.

**5O,5'O-(Butane-1,4-diyl)bis[1,2,3,4,6-O-pentakis(bis(benzyloxy)phosphoryl)myo-inositol] (31f).** Prepared from decaol **30f** according to General Procedure E. Yield: 60%. Colorless thick oil. R<sub>f</sub> = 0.17 (hexanes/EtOAc 1:2). <sup>1</sup>H NMR (500 MHz, CDCl<sub>3</sub>) δ 7.30–7.11 (m, 100H, 20×CH<sub>2</sub>Ph), 5.61 (br d, <sup>3</sup>J<sub>HP</sub> = 8.8 Hz, 2H, H-2), 5.16 (dd, <sup>2</sup>J<sub>HH</sub> = 11.7 Hz, <sup>3</sup>J<sub>HP</sub> = 5.8 Hz, 4H, 2×CH<sub>2</sub>Ph), 5.07–4.92 (m, 36H, 18×CH<sub>2</sub>Ph), 4.87 (q, <sup>3</sup>J<sub>HP</sub> = <sup>3</sup>J<sub>HH</sub> = 9.6 Hz, 4H, H-4 & H-6), 4.30 (br

t,  $^3J_{HP} = ^3J_{HH} = 9.4$  Hz, 4H, H-1 & H-3), 3.48 (br s, 4H, 2×OCH<sub>2</sub>), 2.97 (t,  $J = 9.4$  Hz, 2H, H-5), 1.45 (br s, 4H, 2×OCH<sub>2</sub>CH<sub>2</sub>) ppm. <sup>13</sup>C NMR (126 MHz, CDCl<sub>3</sub>) δ 135.8 (d,  $^3J_{CP} = 6.1$  Hz, 4×C-*i*Ar), 135.7 (d,  $^3J_{CP} = 5.5$  Hz, 4×C-*i*Ar), 135.6 (d,  $^3J_{CP} = 9.0$  Hz, 4×C-*i*Ar), 135.52 (d,  $^3J_{CP} = 7.4$  Hz, 4×C-*i*Ar), 135.46 (d,  $^3J_{CP} = 7.6$  Hz, 4×C-*i*Ar), 128.38, 128.34, 128.27, 128.24, 128.19, 128.18, 128.09, 128.02, 127.92, 127.85, 127.73, 127.67 (C-*o*Ar, C-*m*Ar, C-*p*Ar), 78.7 (br s, C-5), 76.7 (br t,  $^2J_{CP} = 5.9$  Hz, C-4 & C-6), 76.0 (br d,  $^2J_{CP} = 5.4$  Hz, C-2), 74.0 (OCH<sub>2</sub>), 73.6 (br s, C-1 & C-3), 69.9 (d,  $^2J_{CP} = 5.6$  Hz, 4×CH<sub>2</sub>Ph), 69.7 (d,  $^2J_{CP} = 5.3$  Hz, 4×CH<sub>2</sub>Ph), 69.5 (d,  $^2J_{CP} = 6.0$  Hz, 4×CH<sub>2</sub>Ph), 69.4 (d,  $^2J_{CP} = 5.6$  Hz, 4×CH<sub>2</sub>Ph), 69.2 (d,  $^2J_{CP} = 5.2$  Hz, 4×CH<sub>2</sub>Ph), 25.2 (OCH<sub>2</sub>CH<sub>2</sub>) ppm. <sup>31</sup>P NMR (202 MHz, CDCl<sub>3</sub>, <sup>31</sup>P-<sup>1</sup>H decoupled): -0.55 (4P), -1.39 (4P), -2.86 (2P) ppm. HRMS (ESI) calcd. for C<sub>156</sub>H<sub>160</sub>NaO<sub>42</sub>P<sub>10</sub> [M+Na]<sup>+</sup> 3037.7653; found 3037.7640.

**5O,5'O-(Pentane-1,5-diy)bis[2-O-butyryl-1,2,3,4,6-O-**

**tetrakis(bis(benzyloxy)phosphoryl)myo-inositol] (31g).** Prepared from decaol **30g** according to General Procedure E. Yield: 69%. Colorless thick oil. R<sub>f</sub> = 0.17 (hexanes/EtOAc 1:2). <sup>1</sup>H NMR (500 MHz, CDCl<sub>3</sub>) δ 7.24–7.16 (m, 80H, 16×CH<sub>2</sub>Ph), 6.11 (t,  $J = 2.3$  Hz, 2H, H-2), 5.04–4.88 (m, 32H, 16×CH<sub>2</sub>Ph), 4.75 (q,  $^3J_{HP} = ^3J_{HH} = 9.5$  Hz, 4H, H-4 & H-6), 4.32 (td,  $^3J_{HP} = ^3J_{HH} = 10.0$  Hz,  $^3J_{HH} = 2.5$  Hz, 4H, H-1 & H-3), 3.53 (t,  $J = 7.5$  Hz, 4H, 2×OCH<sub>2</sub>), 3.20 (t,  $J = 9.4$  Hz, 2H, H-5), 2.22 (t,  $J = 7.4$  Hz, 4H, 2×COCH<sub>2</sub>), 1.58–1.51 (m, 4H, 2×COCH<sub>2</sub>CH<sub>2</sub>), 1.47–1.41 (m, 4H, 2×OCH<sub>2</sub>CH<sub>2</sub>), 0.87 (t,  $J = 7.4$  Hz, 6H, 2×CH<sub>3</sub>), 0.89 – 0.81 (m, 2H, OCH<sub>2</sub>CH<sub>2</sub>CH<sub>2</sub>) ppm. <sup>13</sup>C NMR (126 MHz, CDCl<sub>3</sub>) δ 171.5 (CO), 135.8 (d,  $^3J_{CP} = 7.2$  Hz, 4×C-*i*Ar), 135.7 (d,  $^3J_{CP} = 7.0$  Hz, 4×C-*i*Ar), 135.6 (d,  $^3J_{CP} = 7.0$  Hz, 4×C-*i*Ar), 135.5 (d,  $^3J_{CP} = 7.1$  Hz, 4×C-*i*Ar), 128.35, 128.32, 128.29, 128.27, 128.25, 128.23, 128.19, 128.09, 127.9, 127.8, 127.7 (C-*o*Ar, C-*m*Ar, C-*p*Ar), 79.0 (br s, C-5), 76.9 (br t,  $^2J_{CP} = 6.5$  Hz, C-4 & C-6), 73.7 (OCH<sub>2</sub>), 73.5 (br s, C-1 & C-3), 69.7 (d,  $^2J_{CP} = 5.6$  Hz, 4×CH<sub>2</sub>Ph), 69.4 (d,  $^2J_{CP} = 5.6$  Hz, 4×CH<sub>2</sub>Ph), 69.3 (d,  $^2J_{CP} = 6.0$  Hz, 4×CH<sub>2</sub>Ph), 69.2 (d,  $^2J_{CP} = 5.3$  Hz, 4×CH<sub>2</sub>Ph), 69.1 (br s, C-2), 35.7 (COCH<sub>2</sub>), 29.3 (OCH<sub>2</sub>CH<sub>2</sub>), 21.5 (OCH<sub>2</sub>CH<sub>2</sub>CH<sub>2</sub>), 18.3 (COCH<sub>2</sub>CH<sub>2</sub>), 13.4 (CH<sub>3</sub>) ppm. <sup>31</sup>P NMR (121 MHz, CDCl<sub>3</sub>, <sup>31</sup>P-<sup>1</sup>H decoupled): -1.46 (4P), -1.69 (4P) ppm. HRMS (ESI) calcd. for C<sub>137</sub>H<sub>148</sub>NaO<sub>38</sub>P<sub>8</sub> [M+Na]<sup>+</sup> 2671.7442; found 2671.7456.

**5O,5'O-(Pentane-1,5-diy)bis[1,2,3,4,6-O-pentakis(bis(benzyloxy)phosphoryl)myo-inositol]**

**(31h).** Prepared from decaol **30h** according to General Procedure E. Yield: 67%. Colorless thick oil. R<sub>f</sub> = 0.18 (hexanes/EtOAc 1:1). <sup>1</sup>H NMR (300 MHz, CDCl<sub>3</sub>) δ 7.30–7.14 (m, 100H, 20×CH<sub>2</sub>Ph), 5.61 (br d,  $^3J_{HP} = 8.8$  Hz, 2H, H-2), 5.16 (dd,  $^2J_{HH} = 11.7$  Hz,  $^3J_{HP} = 6.1$  Hz, 4H, 2×CH<sub>2</sub>Ph), 5.06–4.85 (m, 40H, H-4 & H-6 & 18×CH<sub>2</sub>Ph), 4.32 (br t,  $^3J_{HP} = ^3J_{HH} = 9.4$  Hz, 4H, H-1 & H-3), 3.54 (br t,  $J = 7.4$  Hz, 4H, 2×OCH<sub>2</sub>), 3.21 (t,  $J = 9.3$  Hz, 2H, H-5), 1.47–1.37 (m, 4H, 2×OCH<sub>2</sub>CH<sub>2</sub>), 1.32–1.23 (m, 2H, OCH<sub>2</sub>CH<sub>2</sub>CH<sub>2</sub>) ppm. <sup>13</sup>C NMR (75 MHz, CDCl<sub>3</sub>) δ 136.1–135.7 (m, 20C, 20×C-*i*Ar), 128.45, 128.36, 128.30, 128.26, 128.17, 128.15, 128.12, 128.07, 127.98, 127.86, 127.82 (C-*o*Ar, C-*m*Ar, C-*p*Ar), 79.2 (br s, C-5), 76.8 (br t,  $^2J_{CP} = 6.4$  Hz, C-4 & C-6) 76.2 (br d,  $^2J_{CP} = 5.0$  Hz, C-2), 74.1 (OCH<sub>2</sub>), 73.9 (br s, C-1 & C-3), 70.0 (d,  $^2J_{CP} = 5.7$  Hz, 4×CH<sub>2</sub>Ph), 69.8 (d,  $^2J_{CP} = 5.9$  Hz, 4×CH<sub>2</sub>Ph), 69.8 (d,  $^2J_{CP} = 6.7$  Hz, 4×CH<sub>2</sub>Ph), 69.6 (d,  $^2J_{CP} = 5.6$  Hz, 4×CH<sub>2</sub>Ph), 69.4 (d,  $^2J_{CP} = 5.3$  Hz, 4×CH<sub>2</sub>Ph), 29.5 (OCH<sub>2</sub>CH<sub>2</sub>), 21.6 (OCH<sub>2</sub>CH<sub>2</sub>CH<sub>2</sub>) ppm. <sup>31</sup>P NMR (121 MHz, CDCl<sub>3</sub>, <sup>31</sup>P-<sup>1</sup>H decoupled): -0.89 (4P), -1.45 (4P), -2.77 (2P) ppm. HRMS (ESI) calcd. for C<sub>157</sub>H<sub>162</sub>NaO<sub>42</sub>P<sub>10</sub> [M+Na]<sup>+</sup> 3051.7809; found 3051.7827.

**5,5'-Bis(tetrasodium 2-O-butyryl-1,3,4,6-O-tetrakisphosphono-myoinositol) malonate**

**(5).** Prepared from decaol **31a** according to General Procedure F. Reaction time: 72 h. Yield: 100%. White amorphous solid. FTIR (KBr): 1742, 1647 cm<sup>-1</sup>. <sup>1</sup>H NMR (500 MHz, D<sub>2</sub>O)<sup>S8</sup> δ 5.75 (s, 2H, H-2), 5.24 (t,  $J = 9.6$  Hz, 2H, H-5), 4.53 (q,  $^3J_{HP} = ^3J_{HH} = 9.3$  Hz, 4H, H-4 & H-6), 4.35 (br t,  $^3J_{HP} = 9.1$  Hz, 2H, H-1 & H-3), 2.50 (t,  $J = 7.3$  Hz, 4H, 2×COCH<sub>2</sub>), 1.71–1.64 (m, 4H, 2×COCH<sub>2</sub>CH<sub>2</sub>), 0.95 (t,  $J = 7.4$  Hz, 6H, 2×CH<sub>3</sub>) ppm. <sup>13</sup>C NMR (126 MHz, D<sub>2</sub>O)<sup>S8</sup> δ 175.7 (CO<sub>but</sub>), 168.4 (CO<sub>mal</sub>), 75.0 (br t,  $^2J_{CP} = 5.1$  Hz, C-4 & C-6), 73.8 (br s, C-5), 72.6 (br s, C-1 & C-3), 72.2 (br s, C-2), 39.2 (quintet,  $J_{CD} = 18.0$  Hz, CD<sub>2</sub>), 36.2 (COCH<sub>2</sub>), 18.3 (COCH<sub>2</sub>CH<sub>2</sub>), 13.2 (CH<sub>3</sub>) ppm. <sup>31</sup>P NMR (202 MHz, D<sub>2</sub>O, <sup>31</sup>P-<sup>1</sup>H decoupled): -0.12 (4P), -0.17 (4P) ppm. HRMS (ESI) calcd. for C<sub>23</sub>H<sub>36</sub>Na<sub>7</sub>O<sub>40</sub>P<sub>8</sub> [M-Na]<sup>-</sup> 1360.7973; found 1360.7986.

**5,5'-Bis(pentasodium 1,2,3,4,6-O-pentakisphosphono-myoinositol) malonate (6).**

Prepared from decaol **31b** according to General Procedure F. Reaction time: 48 h. Yield: 100%. White amorphous solid. FTIR (KBr): 1769, 1211  $\text{cm}^{-1}$ .  $^1\text{H}$  NMR (500 MHz,  $\text{D}_2\text{O}$ )<sup>S8</sup>  $\delta$  5.17 (t,  $J = 9.6$  Hz, 2H, H-5), 4.86 (br s, 2H, H-2), 4.48 (q,  $^3J_{\text{HP}} = ^3J_{\text{HH}} = 9.5$  Hz, 4H, H-4 & H-6), 4.22 (br t,  $^3J_{\text{HP}} = ^3J_{\text{HH}} = 8.8$  Hz, 4H, H-1 & H-3) ppm.  $^{13}\text{C}$  NMR (126 MHz,  $\text{D}_2\text{O}$ )<sup>S8</sup>  $\delta$  168.1 (CO), 75.0 (d,  $^2J_{\text{CP}} = 5.2$  Hz, C-2), 74.2 (br t,  $^2J_{\text{CP}} = 5.9$  Hz, C-4 & C-6), 73.5 (br s, C-5), 73.2 (br s, C-1 & C-3), 39.8 (quintet,  $J_{\text{CD}} = 18.3$  Hz,  $\text{CD}_2$ ) ppm.  $^{31}\text{P}$  NMR (121 MHz,  $\text{D}_2\text{O}$ ,  $^{31}\text{P}$ - $^1\text{H}$  decoupled): 0.24 (4P), -0.14 (6P) ppm. HRMS (ESI) calcd. for  $\text{C}_{15}\text{H}_{24}\text{Na}_9\text{O}_{44}\text{P}_{10}$   $[\text{M}-\text{Na}]^-$  1424.6101; found 1424.6112.

**5,5'-Bis(tetrasodium 2-O-butyryl-1,3,4,6-O-tetrakisphosphono-myoinositol) succinate (7).**

Prepared from decaol **31c** according to General Procedure F. Reaction time: 72 h. Yield: 99%. White amorphous solid. FTIR (KBr): 1735, 1183  $\text{cm}^{-1}$ .  $^1\text{H}$  NMR (500 MHz,  $\text{D}_2\text{O}$ )  $\delta$  5.67 (br s, 2H, H-2), 5.12 (t,  $J = 9.6$  Hz, 2H, H-5), 4.47 (q,  $^3J_{\text{HP}} = ^3J_{\text{HH}} = 9.5$  Hz, 4H, H-4 & H-6), 4.28 (td,  $^3J_{\text{HP}} = ^3J_{\text{HH}} = 9.7$  Hz,  $^3J_{\text{HH}} = 1.7$  Hz, 4H, H-1 & H-3), 2.83 (s, 4H,  $\text{COCH}_2\text{CH}_2\text{CO}$ ), 2.46 (t,  $J = 7.3$  Hz, 4H,  $2\times\text{COCH}_2$ ), 1.67–1.59 (m, 4H,  $2\times\text{COCH}_2\text{CH}_2$ ), 0.91 (t,  $J = 7.4$  Hz, 6H,  $2\times\text{CH}_3$ ) ppm.  $^{13}\text{C}$  NMR (126 MHz,  $\text{D}_2\text{O}$ )  $\delta$  175.5 ( $\text{CO}_{\text{but}}$ ), 174.3 ( $\text{CO}_{\text{suc}}$ ), 74.7 (br t,  $^2J_{\text{CP}} = 5.3$  Hz, C-4 & C-6), 73.1 (br s, C-5), 72.2 (br s, C-1 & C-3), 72.0 (br s, C-2), 35.8 ( $\text{COCH}_2$ ), 28.8 ( $\text{COCH}_2\text{CH}_2\text{CO}$ ), 18.0 ( $\text{COCH}_2\text{CH}_2$ ), 12.9 ( $\text{CH}_3$ ) ppm.  $^{31}\text{P}$  NMR (121 MHz,  $\text{D}_2\text{O}$ ,  $^{31}\text{P}$ - $^1\text{H}$  decoupled): 0.42 (4P), -0.13 (4P) ppm. HRMS (ESI) calcd. for  $\text{C}_{24}\text{H}_{38}\text{Na}_7\text{O}_{40}\text{P}_8$   $[\text{M}-\text{Na}]^-$  1374.8130; found 1374.8126.

**5,5'-Bis(pentasodium 1,2,3,4,6-O-pentakisphosphono-myoinositol) succinate (8).**

Prepared from decaol **31d** according to General Procedure F. Reaction time: 72 h. Yield: 95%. White amorphous solid. FTIR (KBr): 1732, 1196  $\text{cm}^{-1}$ .  $^1\text{H}$  NMR (500 MHz,  $\text{D}_2\text{O}$ )  $\delta$  5.14 (br t,  $J = 9.5$  Hz, 2H, H-5), 4.89 (br s, 2H, H-2), 4.50 (br q,  $^3J_{\text{HP}} = ^3J_{\text{HH}} = 9.2$  Hz, 4H, H-4 & H-6), 4.25 (br t,  $^3J_{\text{HP}} = ^3J_{\text{HH}} = 8.2$  Hz, 4H, H-1 & H-3), 2.83 (s, 4H,  $2\times\text{COCH}_2$ ) ppm.  $^{13}\text{C}$  NMR (126 MHz,  $\text{D}_2\text{O}$ )  $\delta$  174.3 (CO), 75.2 (br s, C-2), 74.3 (br t,  $^2J_{\text{CP}} = 5.9$  Hz, C-4 & C-6), 73.2 (br s, C-1 & C-3), 73.1 (br s, C-5), 28.9 ( $\text{COCH}_2$ ) ppm.  $^{31}\text{P}$  NMR (202 MHz,  $\text{D}_2\text{O}$ ,  $^{31}\text{P}$ - $^1\text{H}$  decoupled): 0.60 (4P), 0.05 (2P), -0.20 (4P) ppm. HRMS (ESI) calcd. for  $\text{C}_{16}\text{H}_{26}\text{Na}_9\text{O}_{44}\text{P}_{10}$   $[\text{M}-\text{Na}]^-$  1438.6258; found 1438.6242.

**5O,5'O-(Butane-1,4-diyl)bis[tetrasodium 2-O-butyryl-1,3,4,6-O-tetrakisphosphono-myoinositol] (9).**

Prepared from decaol **31e** according to General Procedure F. Reaction time: 72 h. Yield: 98%. White amorphous solid. FTIR (KBr): 1739, 1203, 1050  $\text{cm}^{-1}$ .  $^1\text{H}$  NMR (500 MHz,  $\text{D}_2\text{O}$ )  $\delta$  5.61 (br s, 2H, H-2), 4.37 (q,  $^3J_{\text{HP}} = ^3J_{\text{HH}} = 9.4$  Hz, 4H, H-4 & H-6), 4.21 (td,  $^3J_{\text{HP}} = ^3J_{\text{HH}} = 9.8$  Hz,  $^3J_{\text{HH}} = 2.4$  Hz, 4H, H-1 & H-3), 3.77 (br s, 4H,  $2\times\text{OCH}_2$ ), 3.46 (t,  $J = 9.4$  Hz, 2H, H-5), 2.44 (t,  $J = 7.3$  Hz, 4H,  $2\times\text{COCH}_2$ ), 1.65–1.58 (m, 8H,  $2\times\text{COCH}_2\text{CH}_2$  &  $2\times\text{OCH}_2\text{CH}_2$ ), 0.90 (t,  $J = 7.4$  Hz, 6H,  $2\times\text{CH}_3$ ) ppm.  $^{13}\text{C}$  NMR (126 MHz,  $\text{D}_2\text{O}$ )  $\delta$  175.5 (CO), 80.1 (br s, C-5), 76.5 (br t,  $^2J_{\text{CP}} = 5.5$  Hz, C-4 & C-6), 73.3 ( $\text{OCH}_2$ ), 72.6 (br d,  $^2J_{\text{CP}} = 4.3$  Hz, C-1 & C-3), 71.9 (br s, C-2), 35.8 ( $\text{COCH}_2$ ), 25.5 ( $\text{OCH}_2\text{CH}_2$ ), 18.0 ( $\text{COCH}_2\text{CH}_2$ ), 12.9 ( $\text{CH}_3$ ) ppm.  $^{31}\text{P}$  NMR (202 MHz,  $\text{D}_2\text{O}$ ,  $^{31}\text{P}$ - $^1\text{H}$  decoupled): 0.08 (4P), -0.59 (4P) ppm. HRMS (ESI) calcd. for  $\text{C}_{24}\text{H}_{42}\text{Na}_7\text{O}_{38}\text{P}_8$   $[\text{M}-\text{Na}]^-$  1346.8544; found 1346.8546.

**5O,5'O-(Butane-1,4-diyl)bis[pentasodium 1,2,3,4,6-O-pentakisphosphono-myoinositol] (10).**

Prepared from decaol **31f** according to General Procedure F. Reaction time: 72 h. Yield: 99%. White amorphous solid. FTIR (KBr): 1203, 1062  $\text{cm}^{-1}$ .  $^1\text{H}$  NMR (500 MHz,  $\text{D}_2\text{O}$ )  $\delta$  4.79 (2H, H-2, obscured), 4.41 (q,  $^3J_{\text{HP}} = ^3J_{\text{HH}} = 9.2$  Hz, 4H, H-4 & H-6), 4.15 (br t,  $^3J_{\text{HP}} = 8.8$  Hz, 4H, H-1 & H-3), 3.80 (br s, 4H,  $2\times\text{OCH}_2$ ), 3.47 (br t,  $J = 9.3$  Hz, 2H, H-5), 1.65 (br s, 4H,  $2\times\text{OCH}_2\text{CH}_2$ ) ppm.  $^{13}\text{C}$  NMR (126 MHz,  $\text{D}_2\text{O}$ )  $\delta$  80.3 (m, C-5), 76.2 (br t,  $^2J_{\text{CP}} = 6.2$  Hz, C-4 & C-6), 75.6–75.5 (m, C-2), 73.52 (m, C-1 & C-3), 73.48 ( $\text{OCH}_2$ ), 25.5 ( $\text{OCH}_2\text{CH}_2$ ) ppm.  $^{31}\text{P}$  NMR (202 MHz,  $\text{D}_2\text{O}$ ,  $^{31}\text{P}$ - $^1\text{H}$  decoupled): 0.52 (4P), -0.49 (6P) ppm. HRMS (ESI) calcd. for  $\text{C}_{16}\text{H}_{30}\text{Na}_9\text{O}_{42}\text{P}_{10}$   $[\text{M}-\text{Na}]^-$  1410.6673; found 1410.6653.

**5O,5'O-(Pentane-1,5-diyl)bis[tetrasodium 2-O-butyryl-1,3,4,6-O-tetrakisphosphono-myoinositol] (11).**

Prepared from decaol **31g** according to General Procedure F. Reaction time: 72 h. Yield: 100%. White amorphous solid. FTIR (KBr): 1742, 1200, 1055  $\text{cm}^{-1}$ .  $^1\text{H}$  NMR (500

MHz, D<sub>2</sub>O)  $\delta$  5.61 (s, 2H, H-2), 4.37 (q,  $^3J_{\text{HP}} = ^3J_{\text{HH}} = 9.3$  Hz, 4H, H-4 & H-6), 4.20 (t,  $^3J_{\text{HP}} = ^3J_{\text{HH}} = 9.7$  Hz, 4H, H-1 & H-3), 3.75 (br t,  $J = 6.9$  Hz, 4H, 2 $\times$ OCH<sub>2</sub>), 3.46 (t,  $J = 9.4$  Hz, 2H, H-5), 2.45 (t,  $J = 7.2$  Hz, 4H, 2 $\times$ COCH<sub>2</sub>), 1.65–1.60 (m, 8H, 2 $\times$ COCH<sub>2</sub>CH<sub>2</sub> & 2 $\times$ OCH<sub>2</sub>CH<sub>2</sub>), 1.30–1.25 (m, 2H, OCH<sub>2</sub>CH<sub>2</sub>CH<sub>2</sub>), 0.91 (t,  $J = 7.4$  Hz, 6H, 2 $\times$ OCH<sub>3</sub>) ppm. <sup>13</sup>C NMR (126 MHz, D<sub>2</sub>O)  $\delta$  175.5 (CO), 80.1 (br s, C-5), 76.6 (br t,  $^2J_{\text{CP}} = 5.3$  Hz, C-4 & C-6), 73.4 (OCH<sub>2</sub>), 72.6 (br d,  $^2J_{\text{CP}} = 4.6$  Hz, C-1 & C-3), 72.0 (br s, C-2), 35.9 (COCH<sub>2</sub>), 29.1 (OCH<sub>2</sub>CH<sub>2</sub>), 21.2 (OCH<sub>2</sub>CH<sub>2</sub>CH<sub>2</sub>), 18.0 (COCH<sub>2</sub>CH<sub>2</sub>), 13.0 (CH<sub>3</sub>) ppm. <sup>31</sup>P NMR (121 MHz, D<sub>2</sub>O, <sup>31</sup>P-<sup>1</sup>H decoupled): 0.43 (4P), –0.33 (4P) ppm. HRMS (ESI) calcd. for C<sub>25</sub>H<sub>44</sub>Na<sub>7</sub>O<sub>38</sub>P<sub>8</sub> [M–Na]<sup>–</sup> 1360.8701; found 1360.8693.

**5O,5'O-(Pentane-1,5-diyl)bis[pentasodium 1,2,3,4,6-O-pentakisphosphono-myo-inositol] (12).** Prepared from decaol **31h** according to General Procedure F. Reaction time: 48 h. Yield: 98%. White amorphous solid. FTIR (KBr): 1200, 1055 cm<sup>–1</sup>. <sup>1</sup>H NMR (500 MHz, D<sub>2</sub>O)  $\delta$  4.79 (2H, H-2, obscured), 4.35 (q,  $^3J_{\text{HP}} = ^3J_{\text{HH}} = 7.8$  Hz, 4H, H-4 & H-6), 4.08 (br t,  $^3J_{\text{HP}} = 8.7$  Hz, 4H, H-1 & H-3), 3.75 (t,  $J = 5.0$  Hz, 4H, 2 $\times$ OCH<sub>2</sub>), 3.41 (t,  $J = 9.2$  Hz, 2H, H-5), 1.65–1.59 (m, 4H, 2 $\times$ OCH<sub>2</sub>CH<sub>2</sub>), 1.28–1.22 (m, 2H, OCH<sub>2</sub>CH<sub>2</sub>CH<sub>2</sub>) ppm. <sup>13</sup>C NMR (126 MHz, D<sub>2</sub>O)  $\delta$  80.5 (br s, C-5), 76.3 (br s, C-4 & C-6), 75.5 (br s, C-2), 73.6 (OCH<sub>2</sub>), 73.5 (br s, C-1 & C-3), 29.2 (OCH<sub>2</sub>CH<sub>2</sub>), 21.2 (OCH<sub>2</sub>CH<sub>2</sub>CH<sub>2</sub>) ppm. <sup>31</sup>P NMR (202 MHz, D<sub>2</sub>O, <sup>31</sup>P-<sup>1</sup>H decoupled): 1.37 (4P), 0.09 (2P), –0.38 (4P) ppm. HRMS (ESI) calcd. for C<sub>17</sub>H<sub>32</sub>Na<sub>9</sub>O<sub>42</sub>P<sub>10</sub> [M–Na]<sup>–</sup> 1424.6829; found 1424.6851.

S1 S. J. Mills, A. M. Riley, C. Liu, M. F. Mahon and B. V. L. Potter, *Chem. Eur. J.*, 2003, **9**, 6207.

S2 A. E. Koumbis, C. D. Duarte, C. Nicolau and J.-M. Lehn, *ChemMedChem*, 2011, **6**, 169.

S3 M. T. Rudolf, T. Kaiser, A. H. Guse, G. W. Mayr and C. Schultz, *Liebigs Ann./Recueil*, 1997, 1861.

S4 A. M. Riley, H. Wang, J. D. Weaver, S. B. Shears and B. V. L. Potter, *Chem. Commun.*, 2012, **48**, 11292.

S5 H. Wang, H. Y. Godage, A. M. Riley, J. D. Weaver, S. B. Shears and B. V. L. Potter, *Chem. Biol.*, 2014, **21**, 689.

S6 A. E. Martin, T. M. Ford and J. E. Bulkowski, *J. Org. Chem.*, 1982, **47**, 412.

S7 D. H. Bus, D. J. Olszanski, J. C. Stevens, W. P. Schammel, M. Kojima, N. Herron, L. Zimmer, K. A. Holter and J. Mocak, *J. Am. Chem. Soc.*, 1981, **103**, 1472.

S8 For compounds **5** and **6** a rapid H-D exchange of malonic protons in the NMR solvent (D<sub>2</sub>O) occurs. Therefore, these protons disappear in the <sup>1</sup>H NMR spectrum, whereas a quintet is observed in the <sup>13</sup>C NMR spectrum for the CD<sub>2</sub> group (around 40 ppm). The complete insolubility of these compounds in non-protic solvents did not allow us to run other NMR experiments. The provided data (NMR and HRMS) are consistent with the given structures.



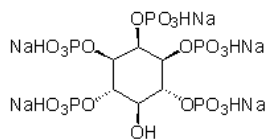

D<sub>2</sub>O, 500 MHz, 20 °C  
<sup>1</sup>H NMR

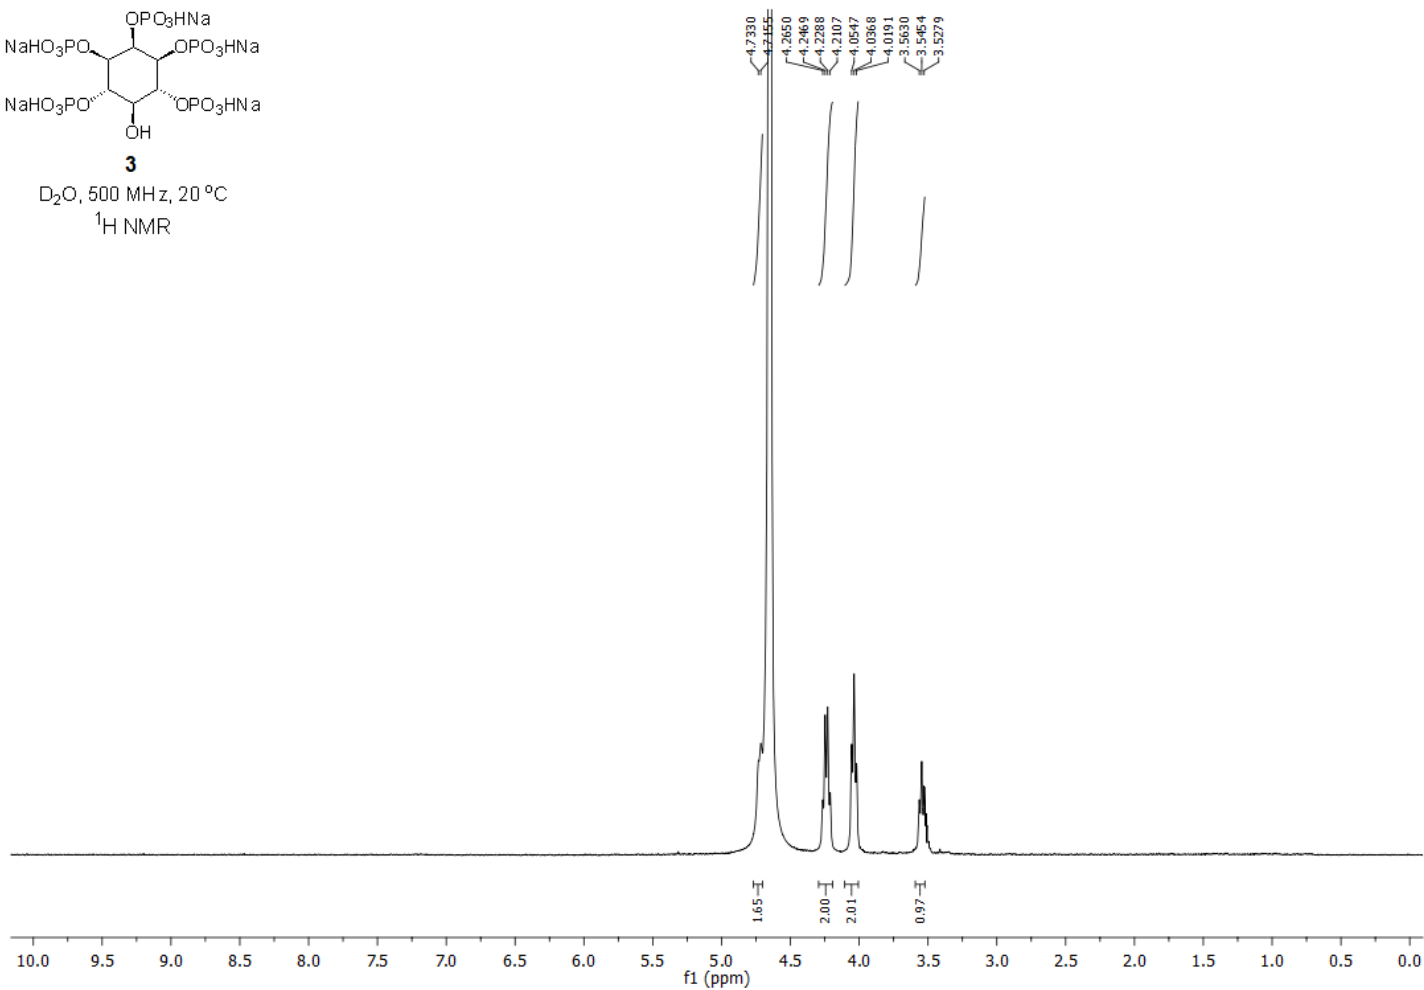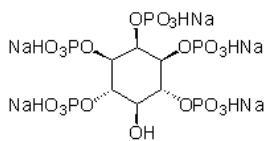

D<sub>2</sub>O, 126 MHz, 20 °C  
<sup>13</sup>C NMR

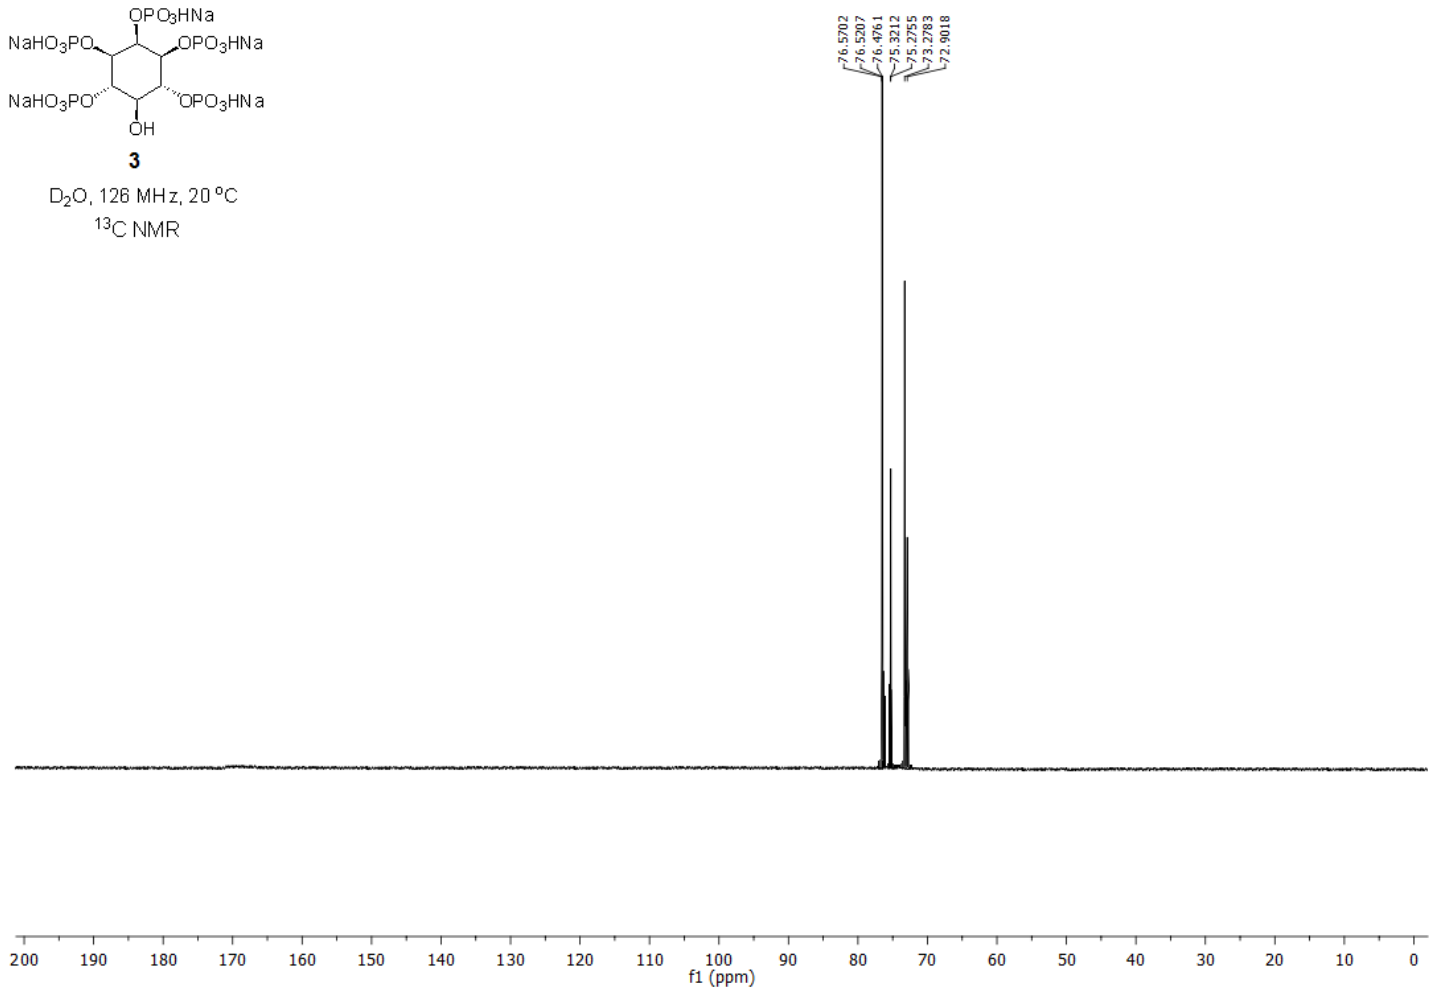

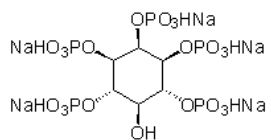

**3**

D<sub>2</sub>O, 202 MHz, 20 °C

<sup>31</sup>P NMR

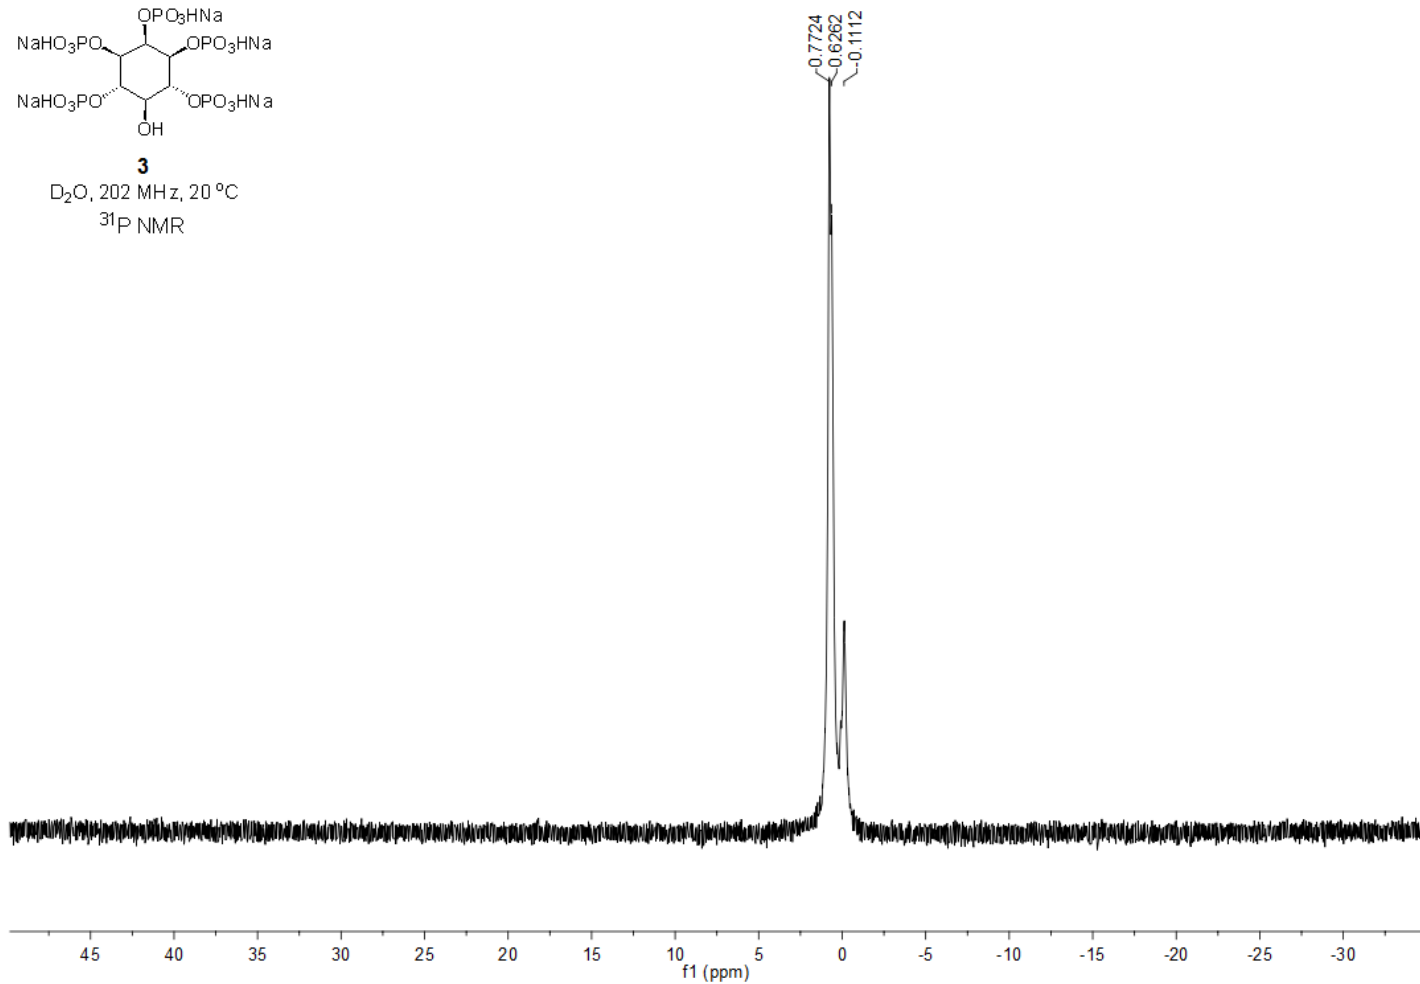



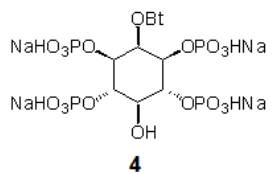

D<sub>2</sub>O, 202 MHz, 20 °C  
<sup>31</sup>P NMR

0.0008  
8000.0

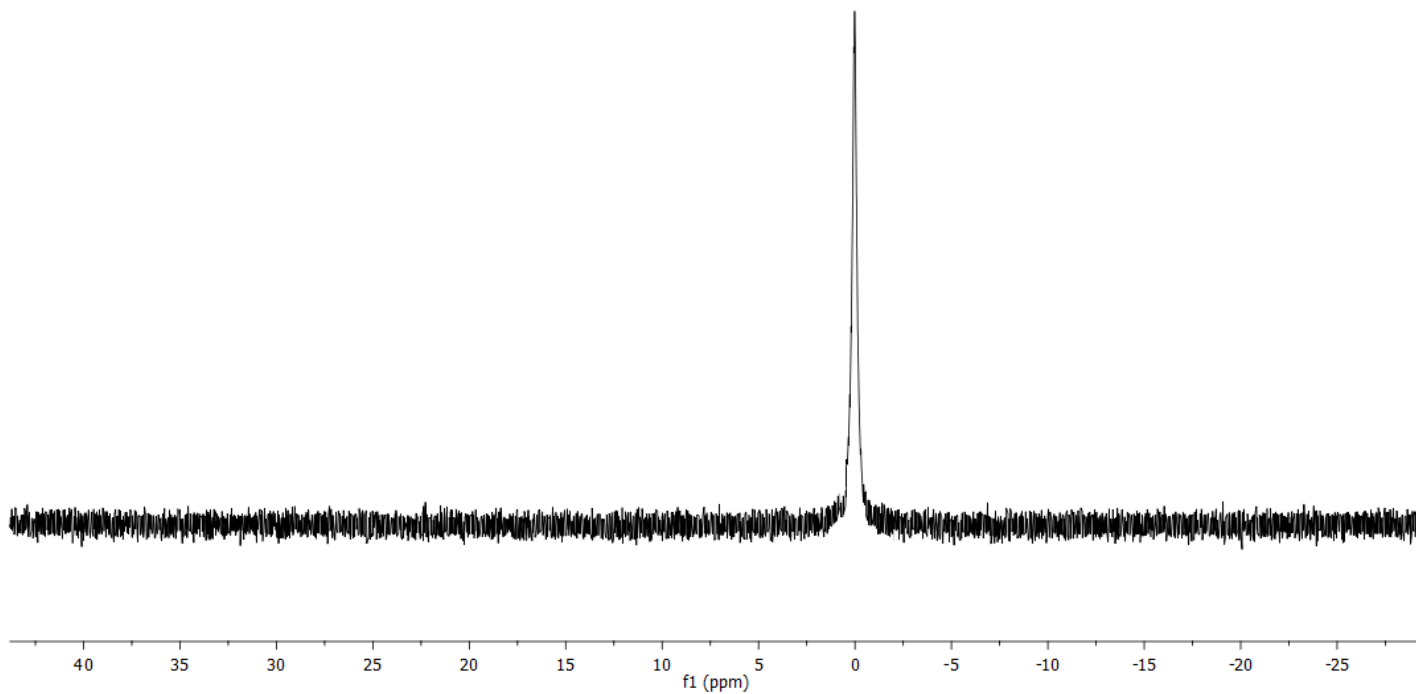





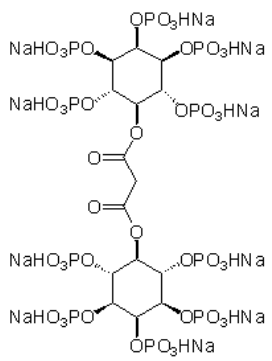

**6**

D<sub>2</sub>O, 500 MHz, 20 °C  
<sup>1</sup>H NMR

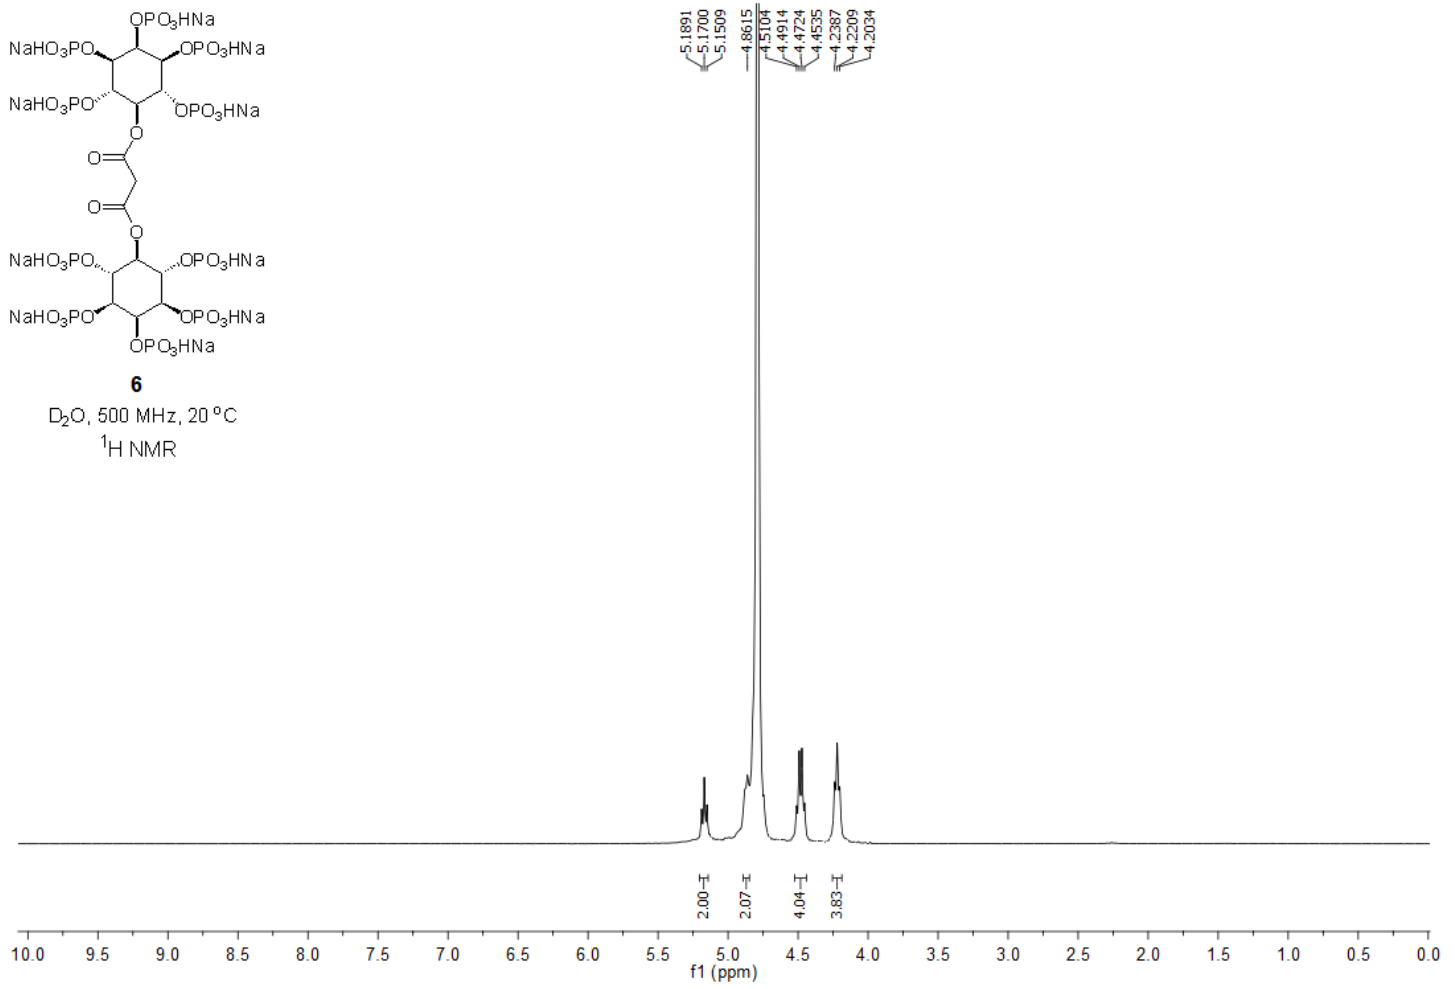

168.1377

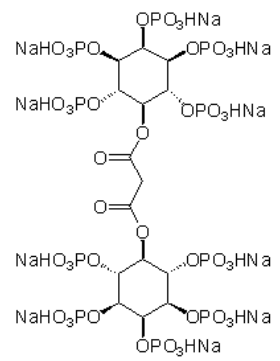

**6**

D<sub>2</sub>O, 126 MHz, 20 °C  
<sup>13</sup>C NMR

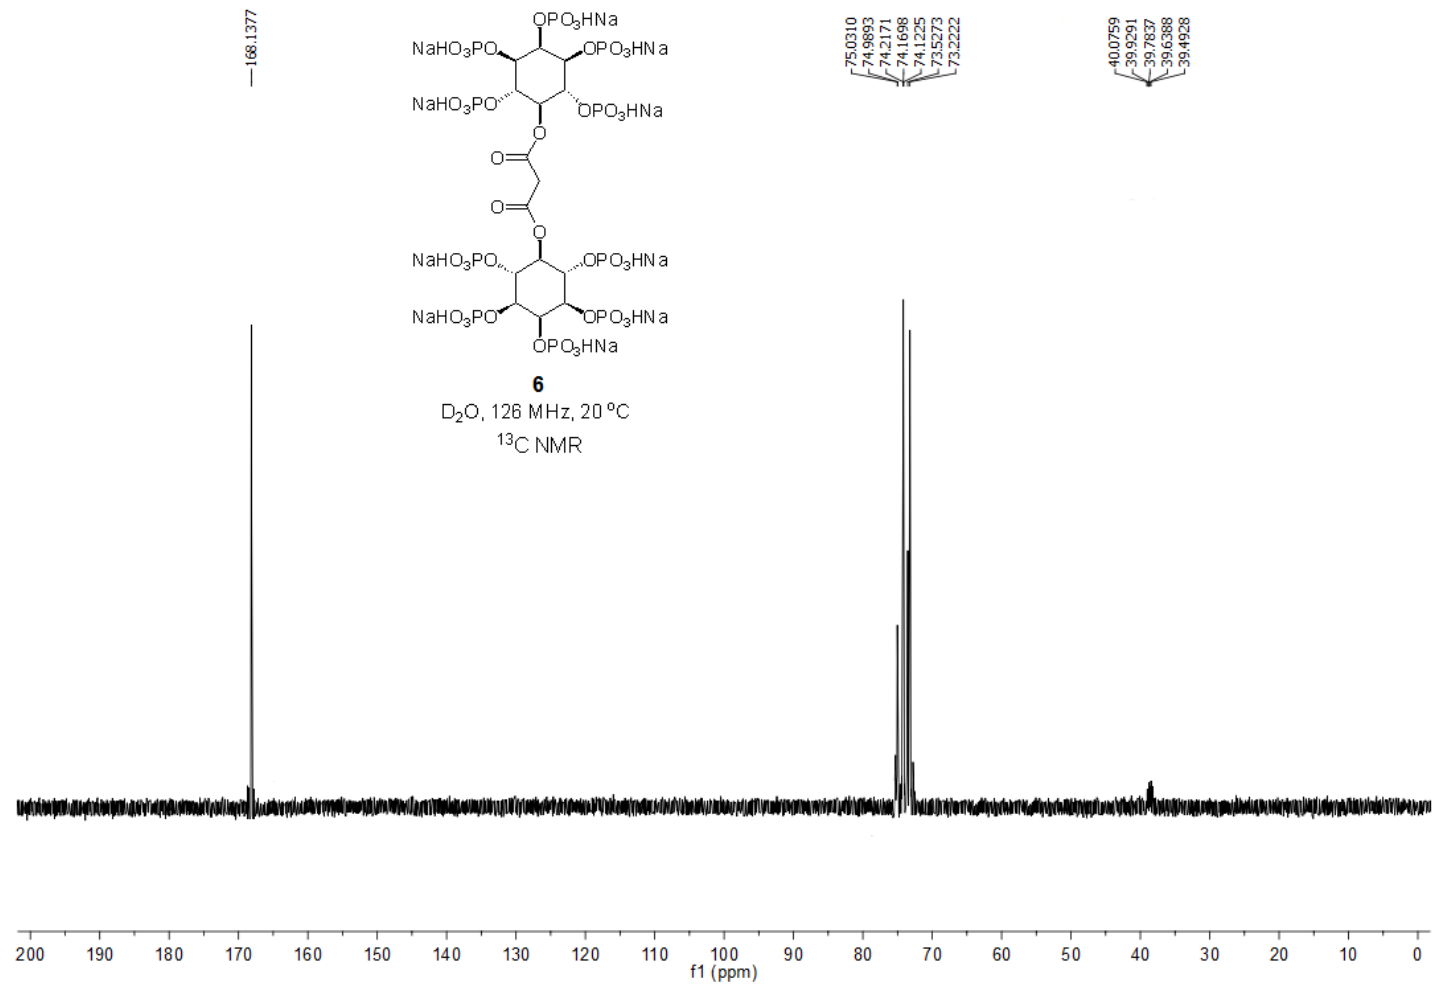







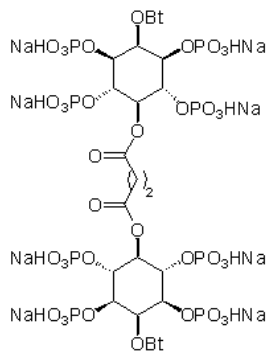

**7**

D<sub>2</sub>O, 121 MHz, 20 °C

<sup>31</sup>P NMR

0.4212  
-0.1293

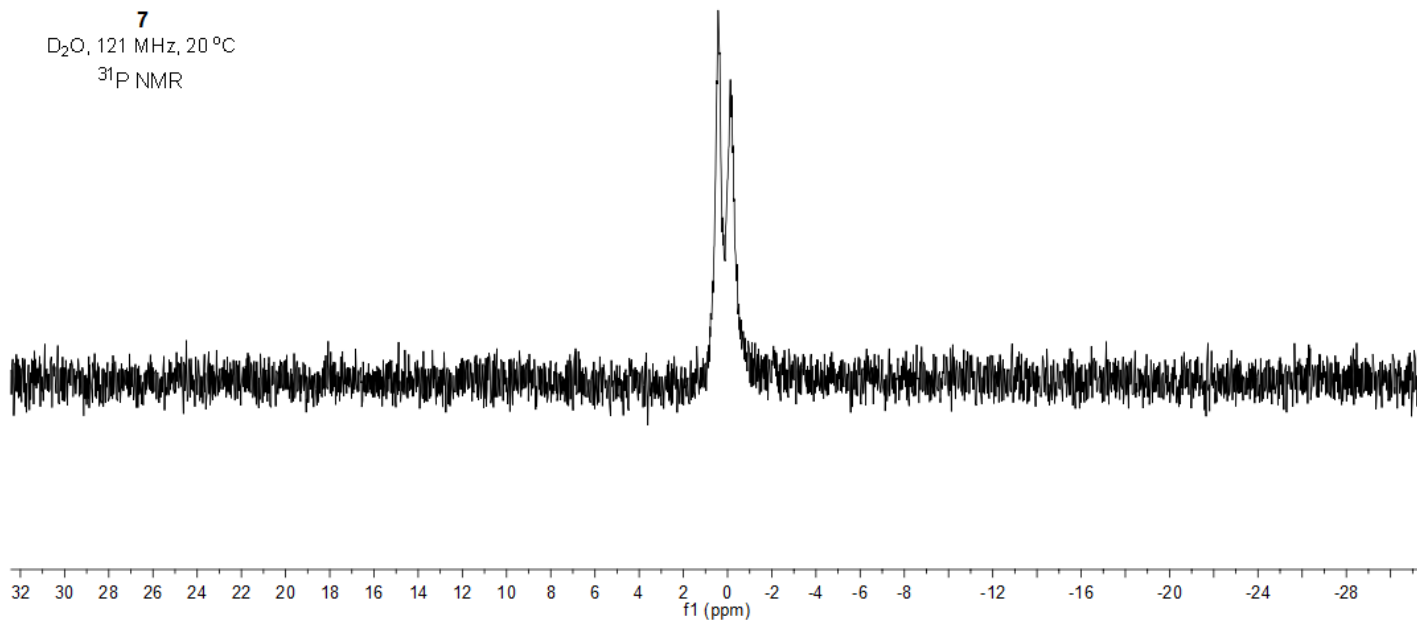



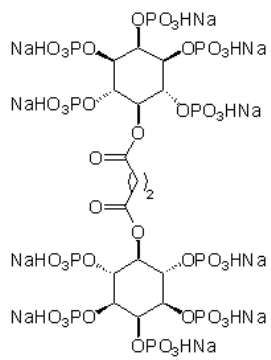

**8**

D<sub>2</sub>O, 202 MHz, 20 °C

<sup>31</sup>P NMR

0.5959  
-0.0442  
-0.2049

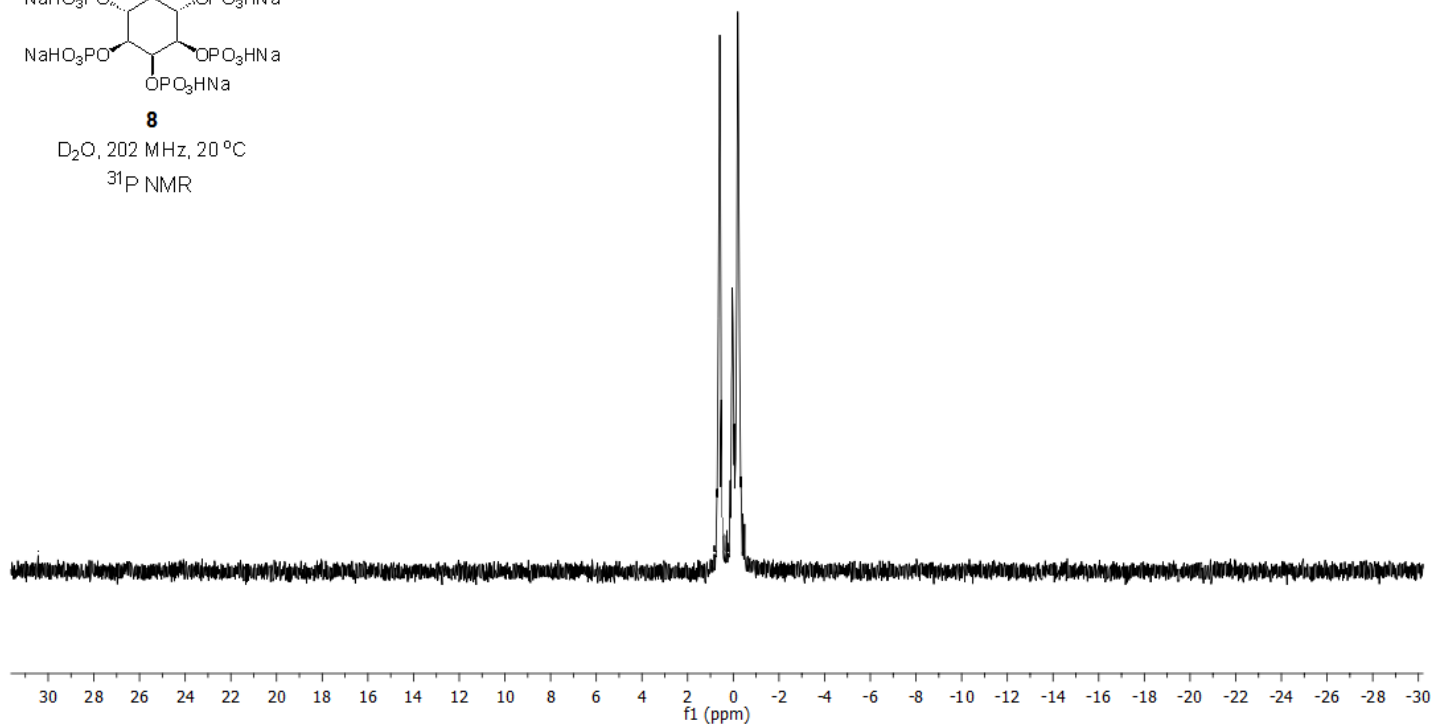



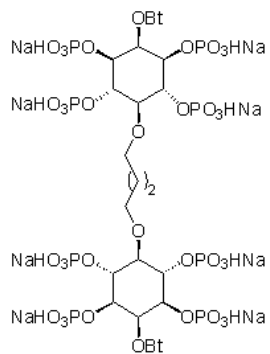

**9**

D<sub>2</sub>O, 202 MHz, 20 °C  
<sup>31</sup>P NMR

0.4812  
-0.1032

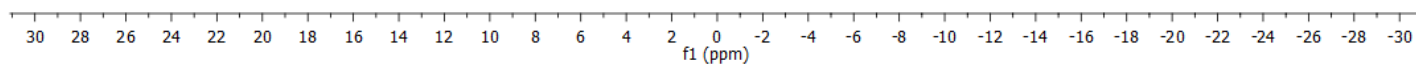







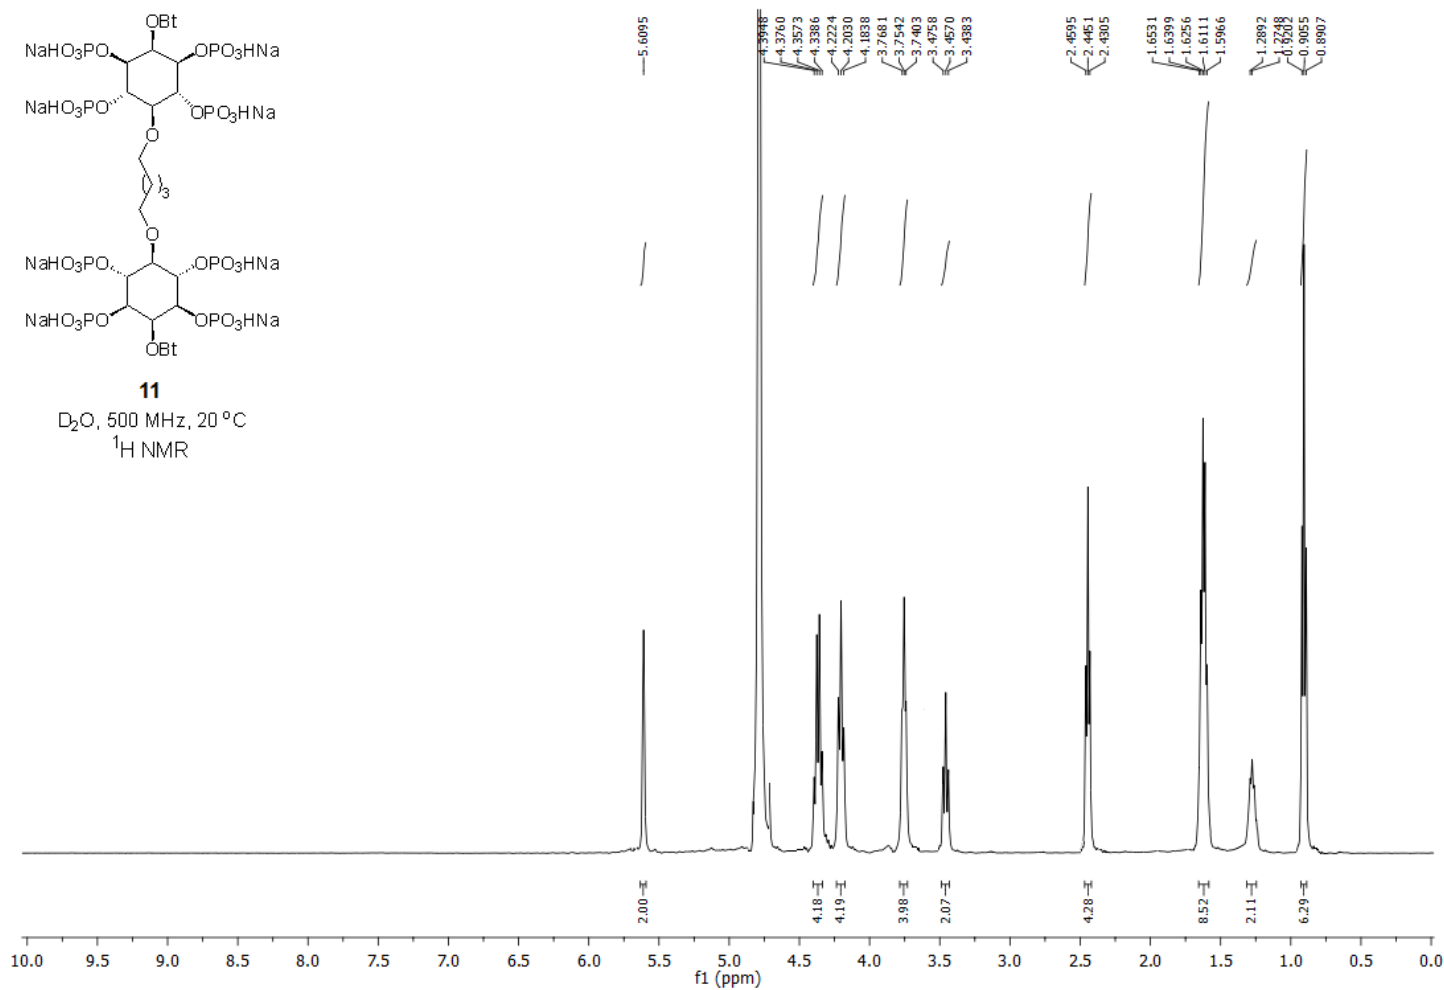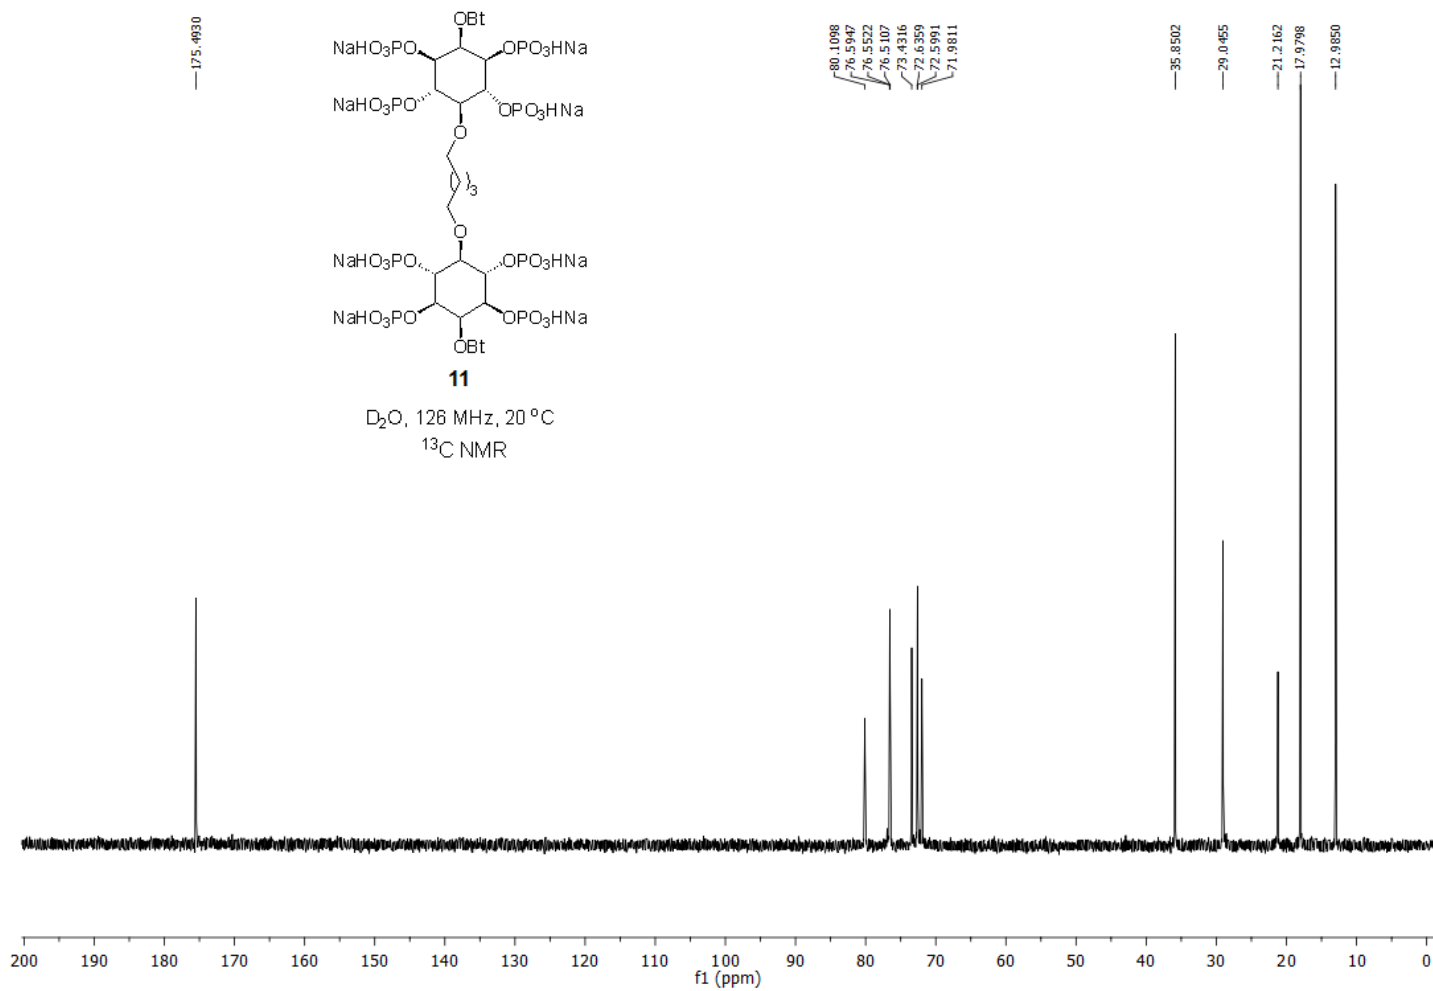

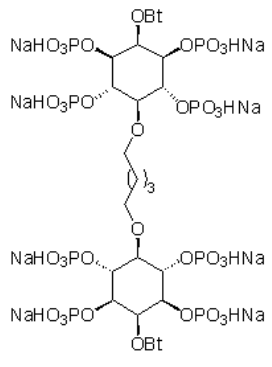

**11**

D<sub>2</sub>O, 121 MHz, 20 °C  
<sup>31</sup>P NMR

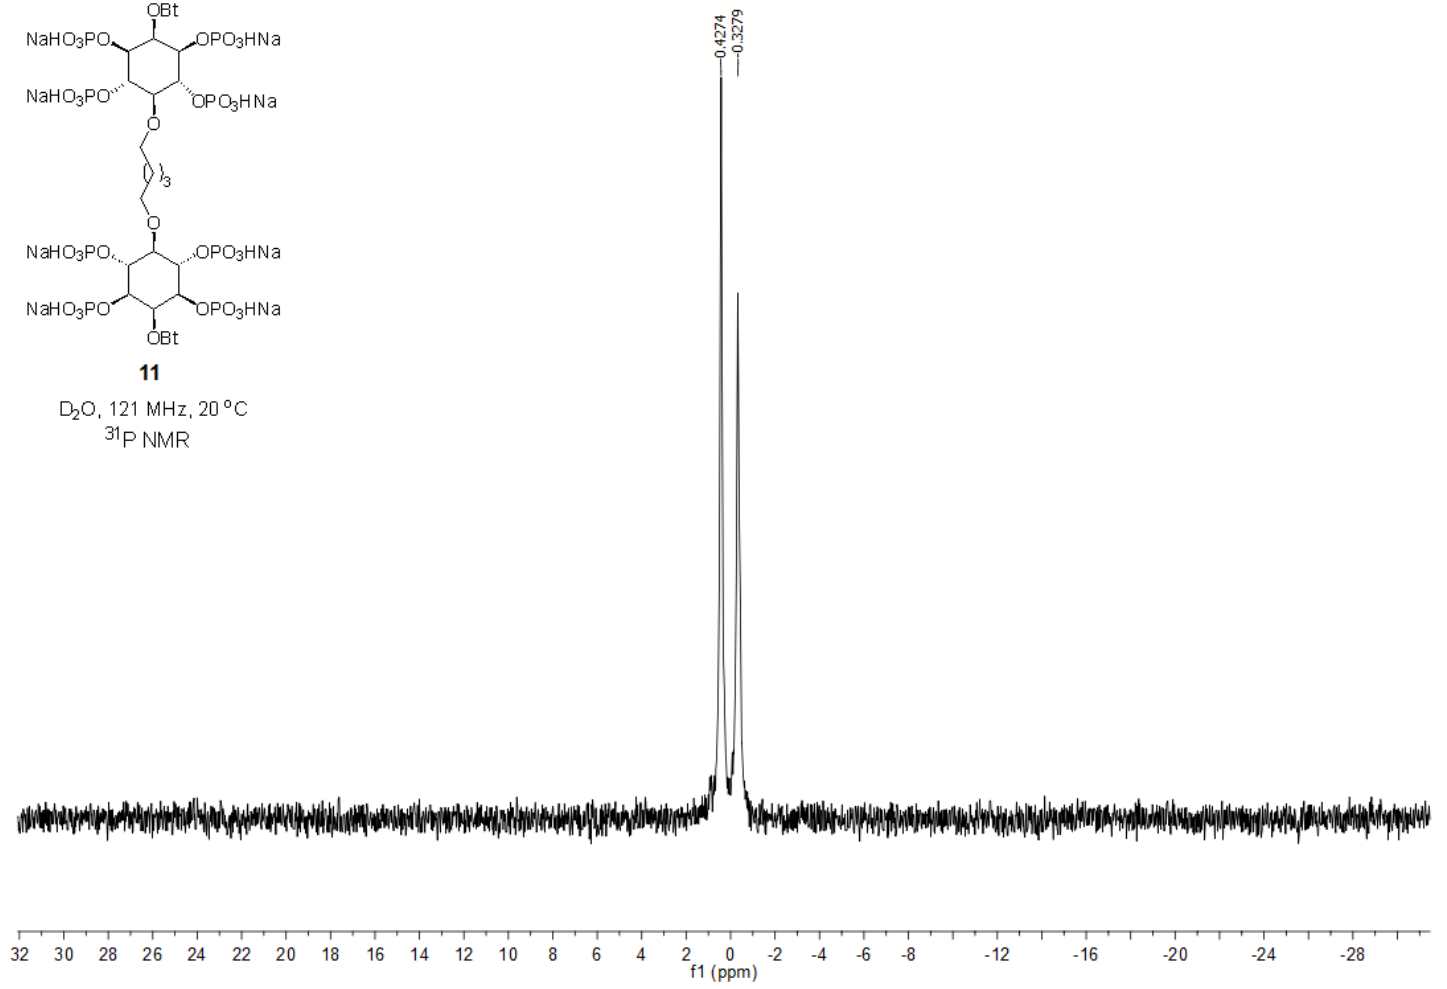

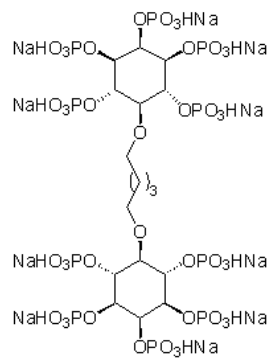

**12**

D<sub>2</sub>O, 500 MHz, 20 °C  
<sup>1</sup>H NMR

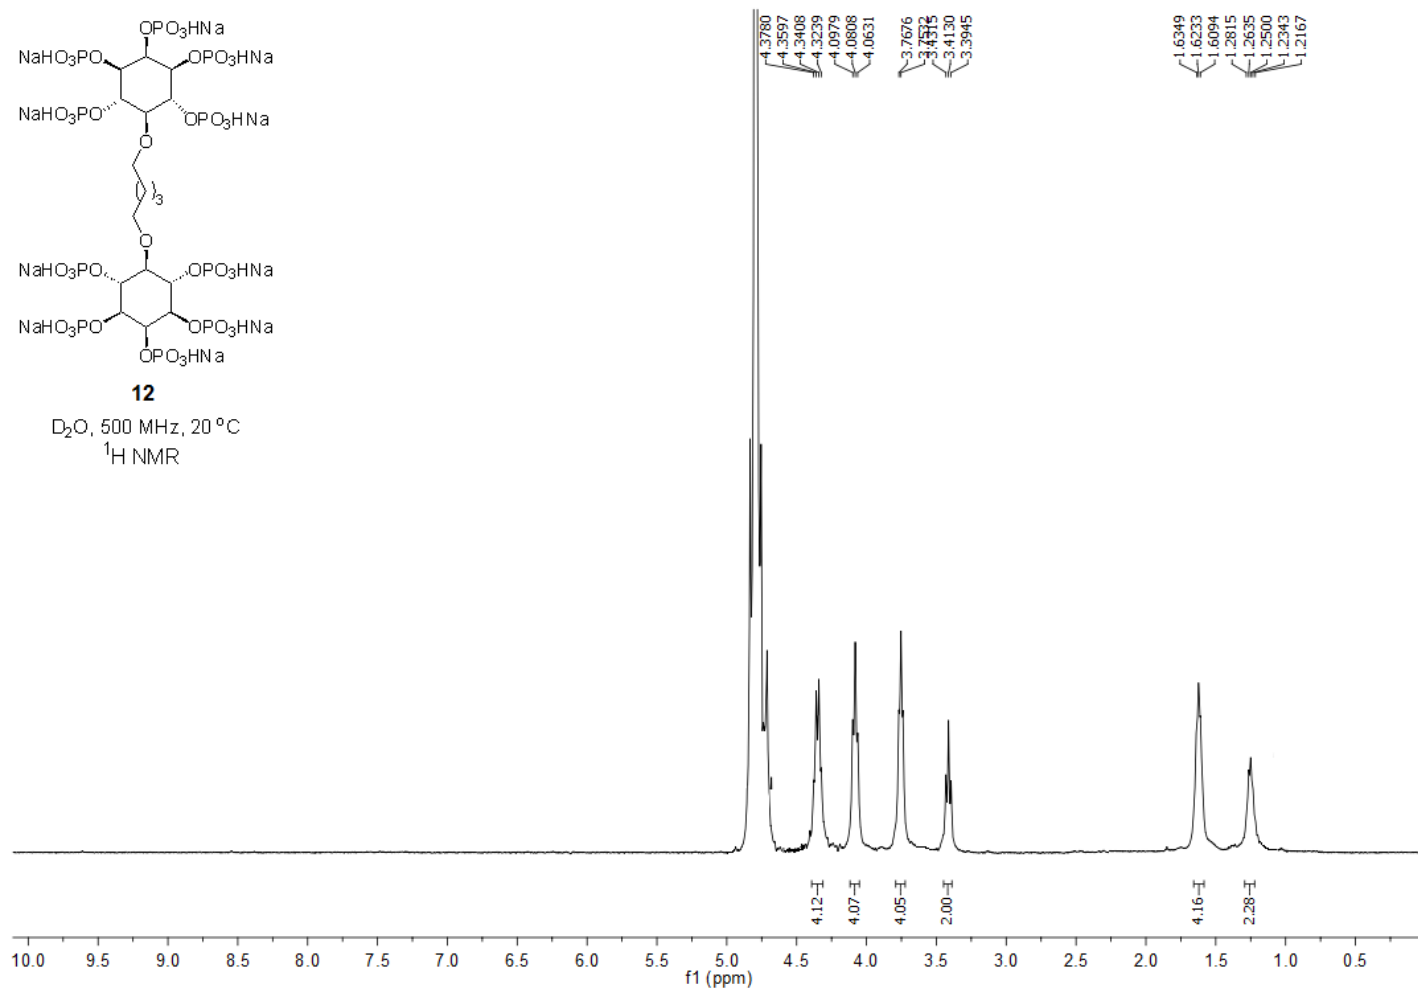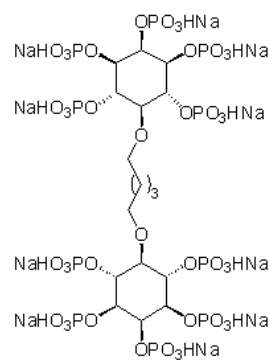

**12**

D<sub>2</sub>O, 126 MHz, 20 °C  
<sup>13</sup>C NMR

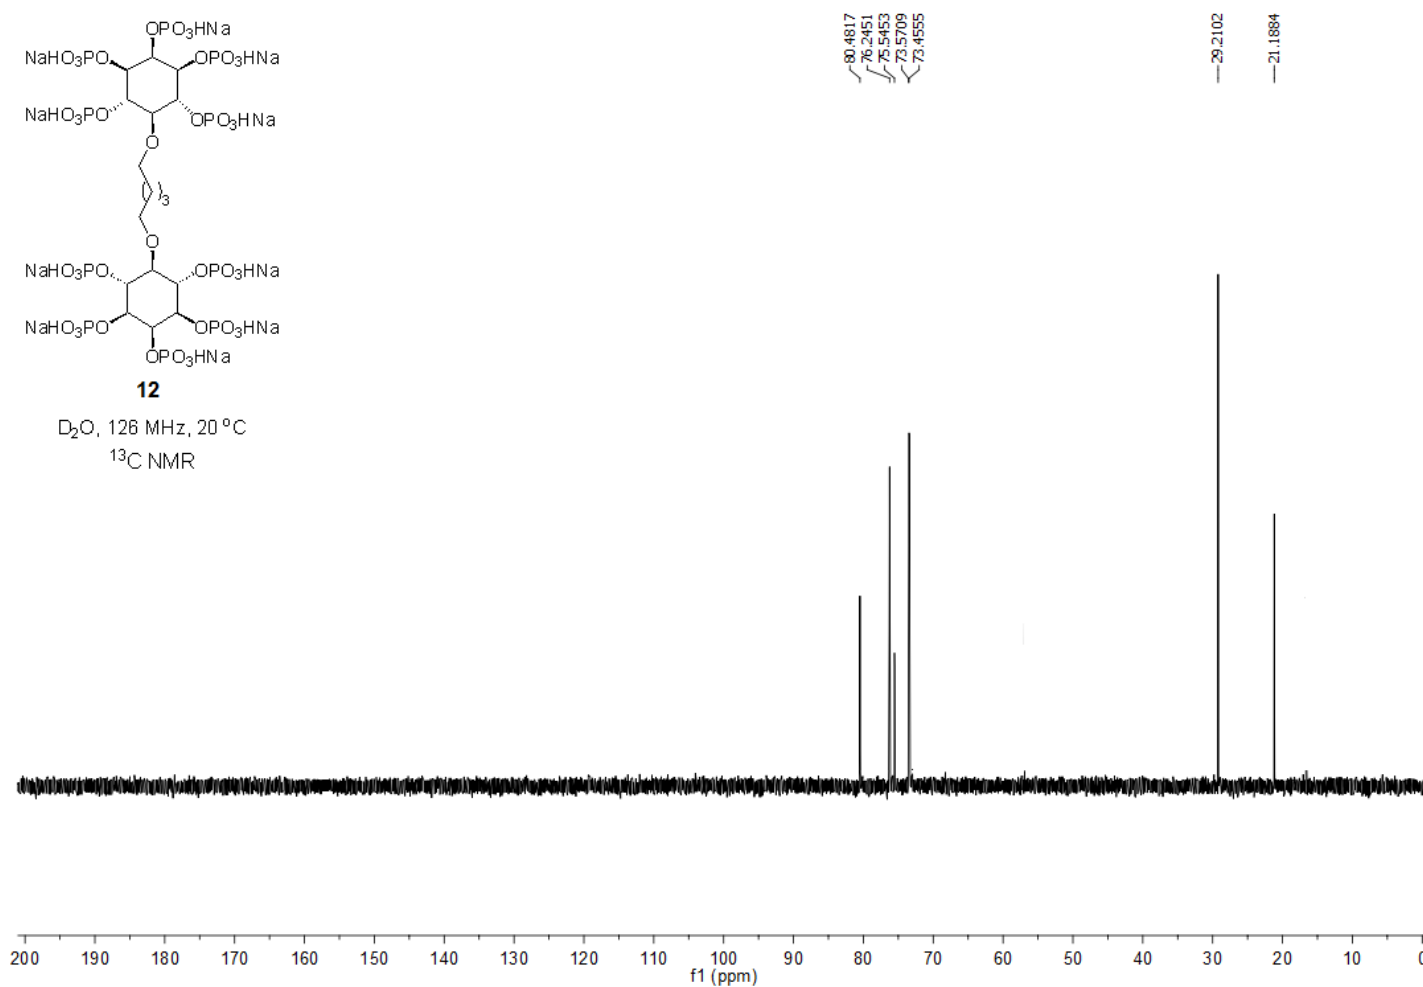

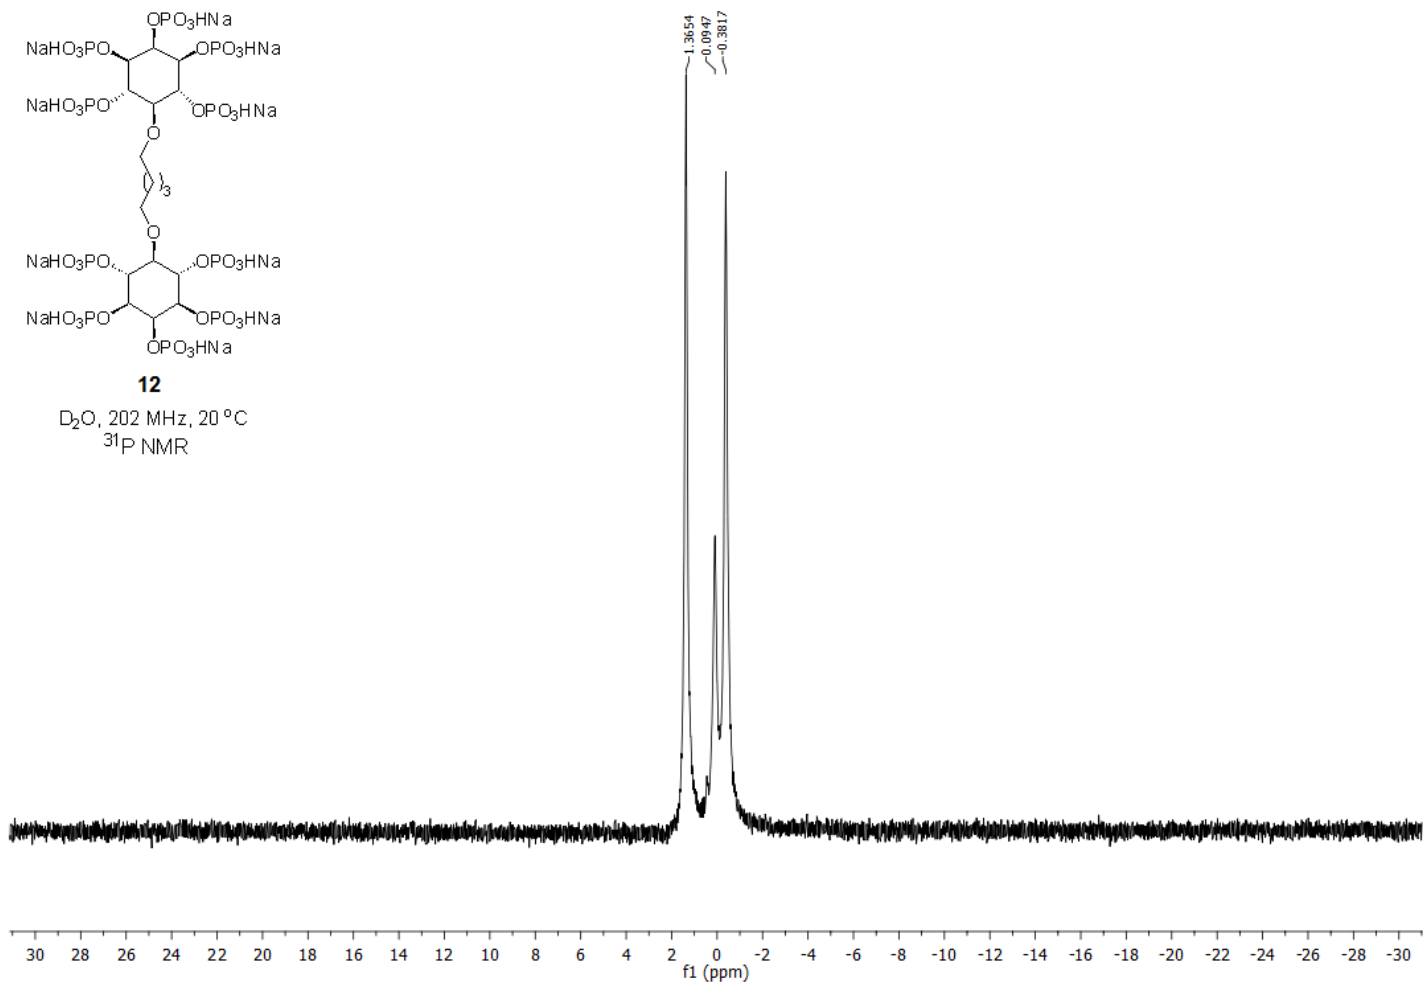

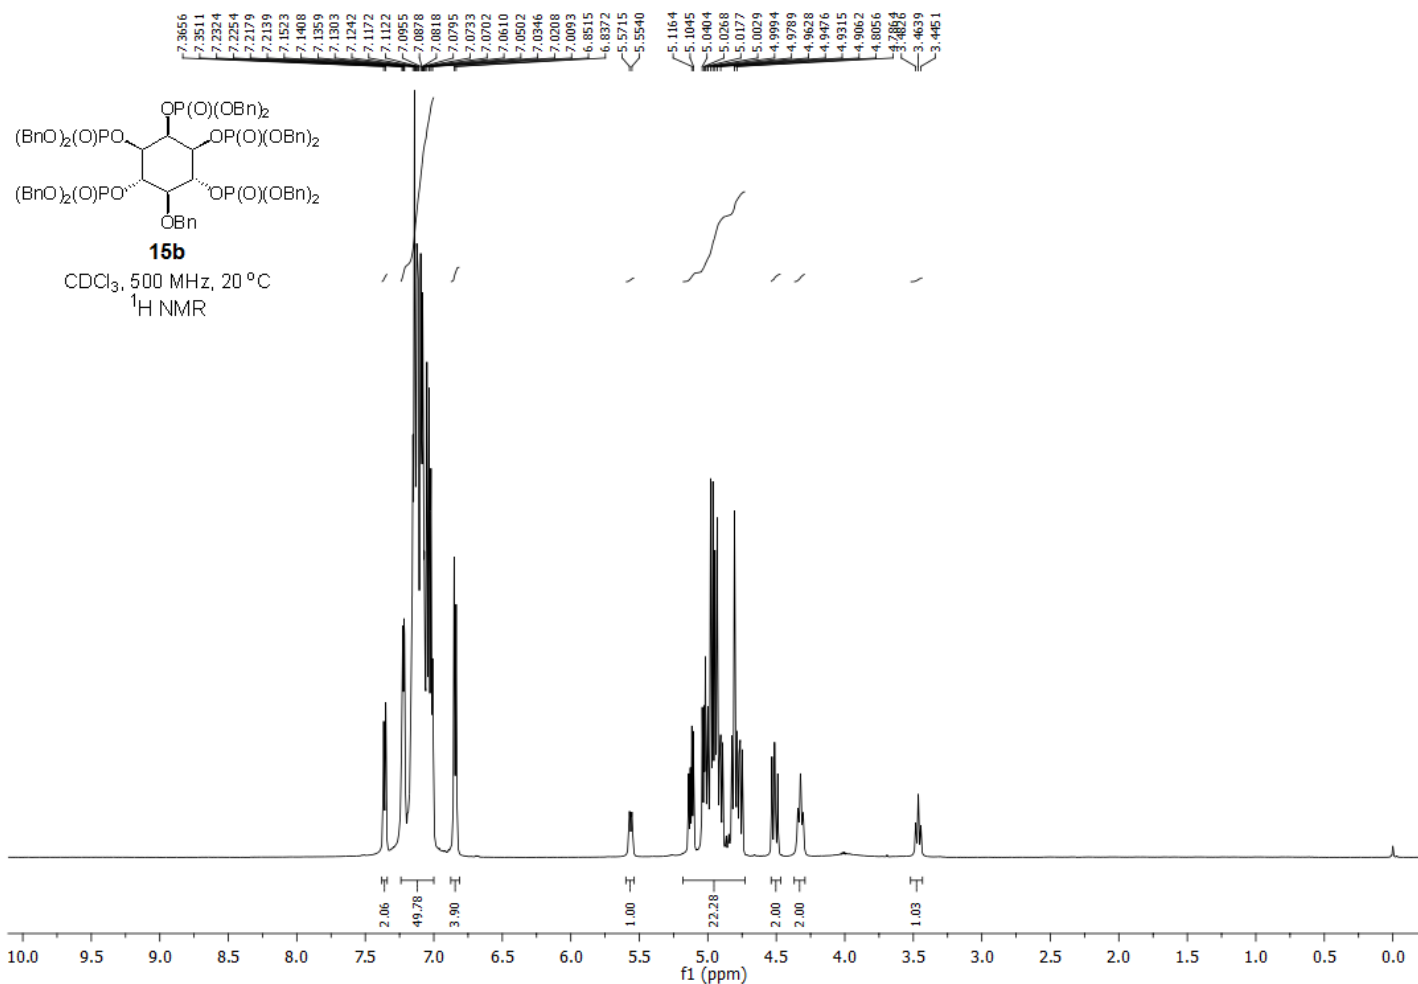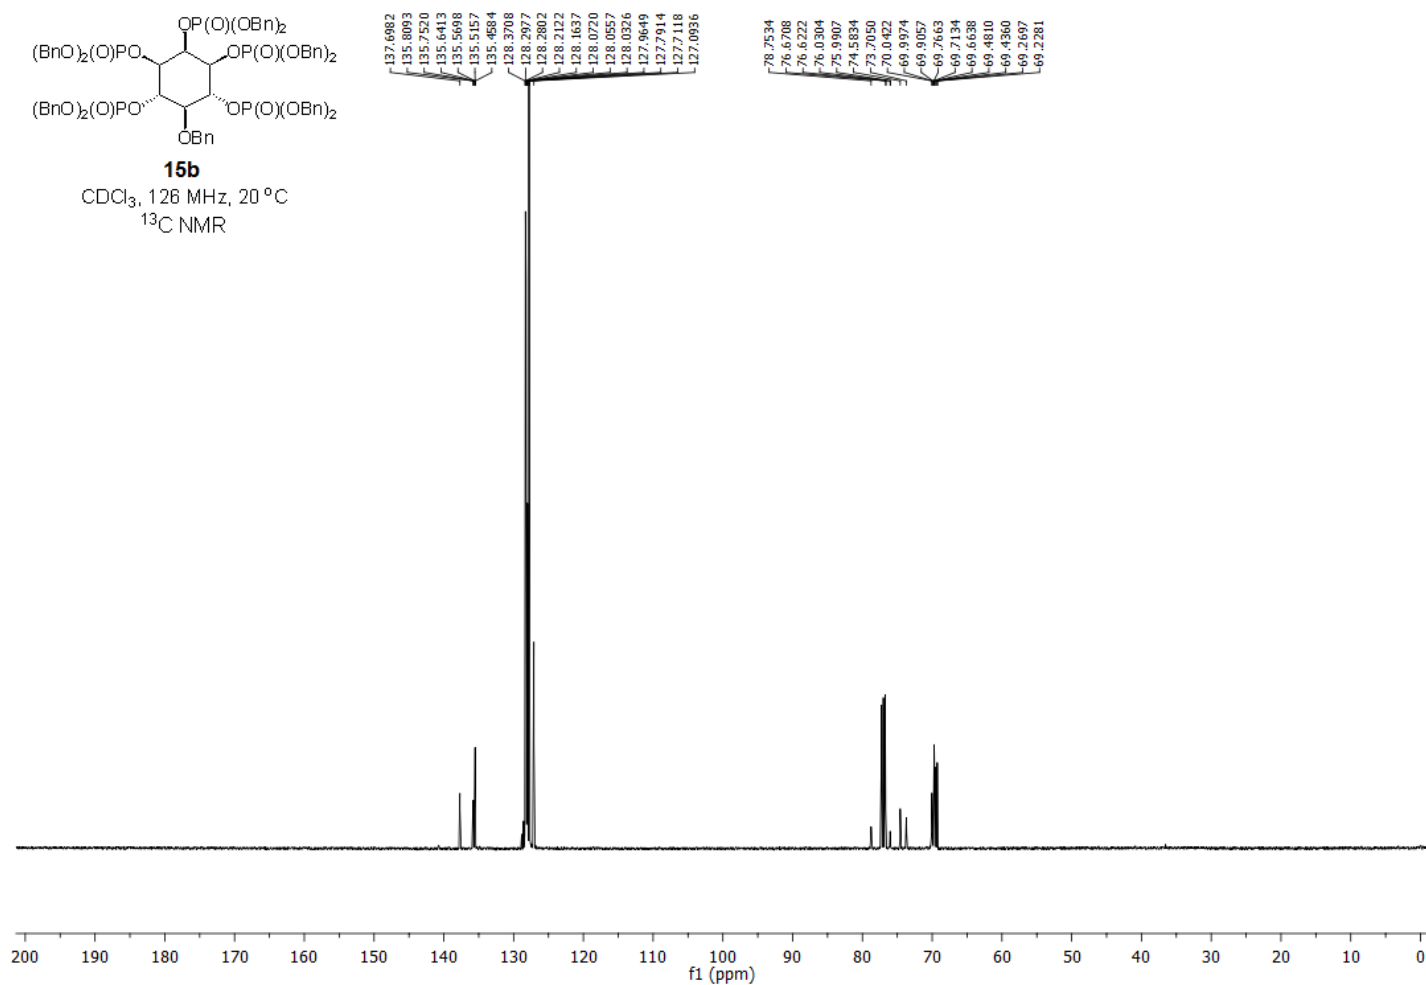

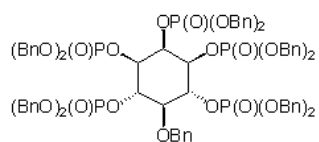

**15b**

CDCl<sub>3</sub>, 202 MHz, 20 °C  
<sup>31</sup>P NMR

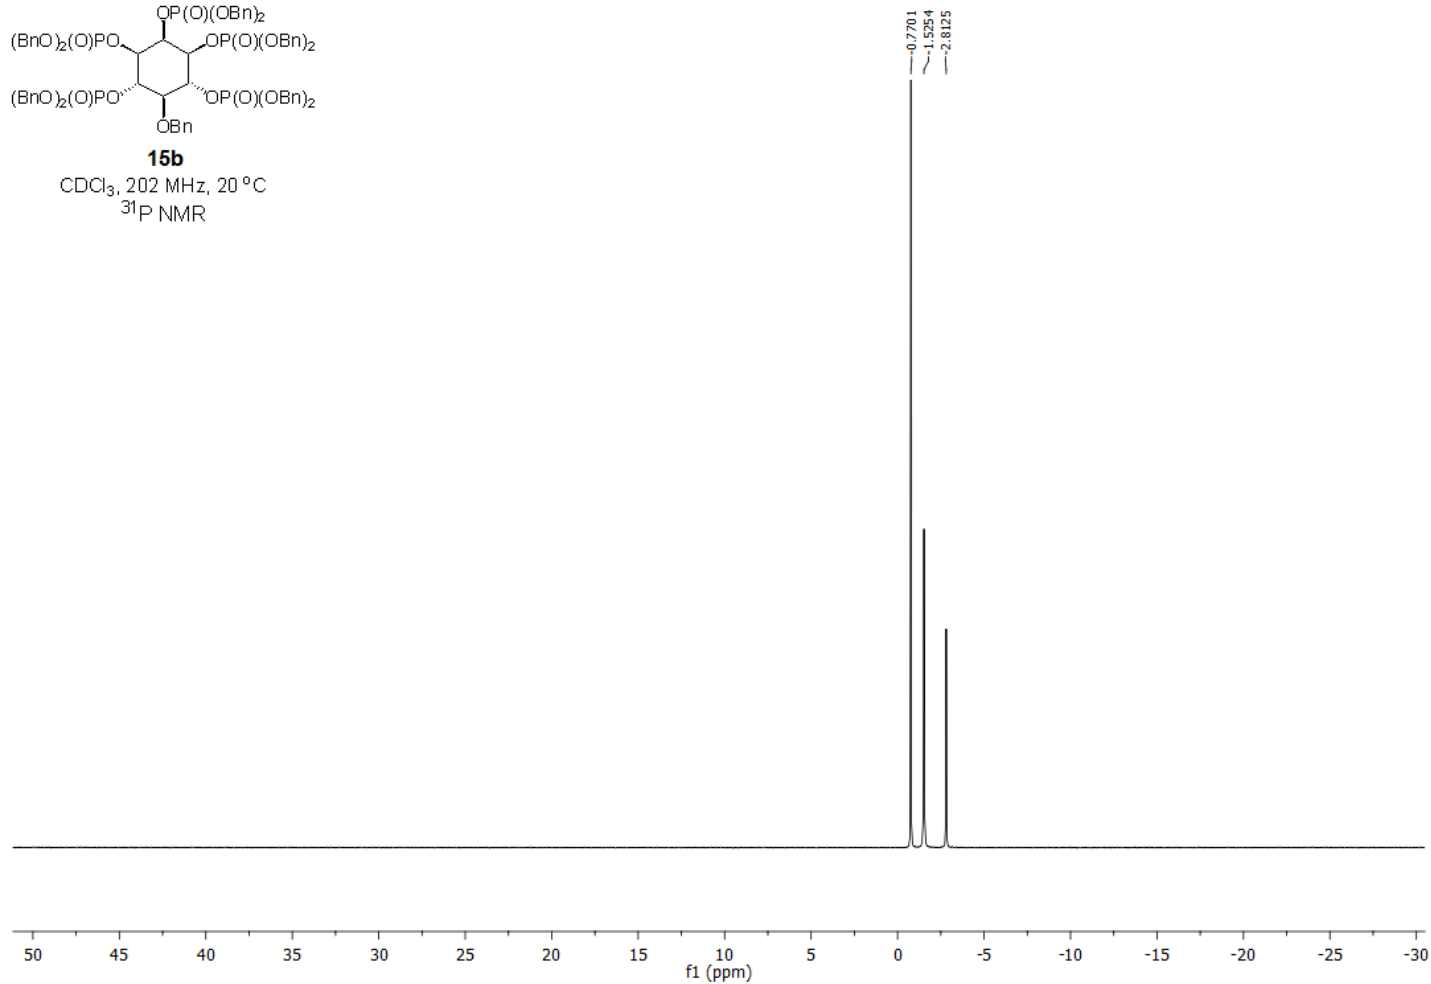

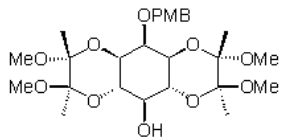

**16a**

CDCl<sub>3</sub>, 500 MHz, 20 °C  
<sup>1</sup>H NMR

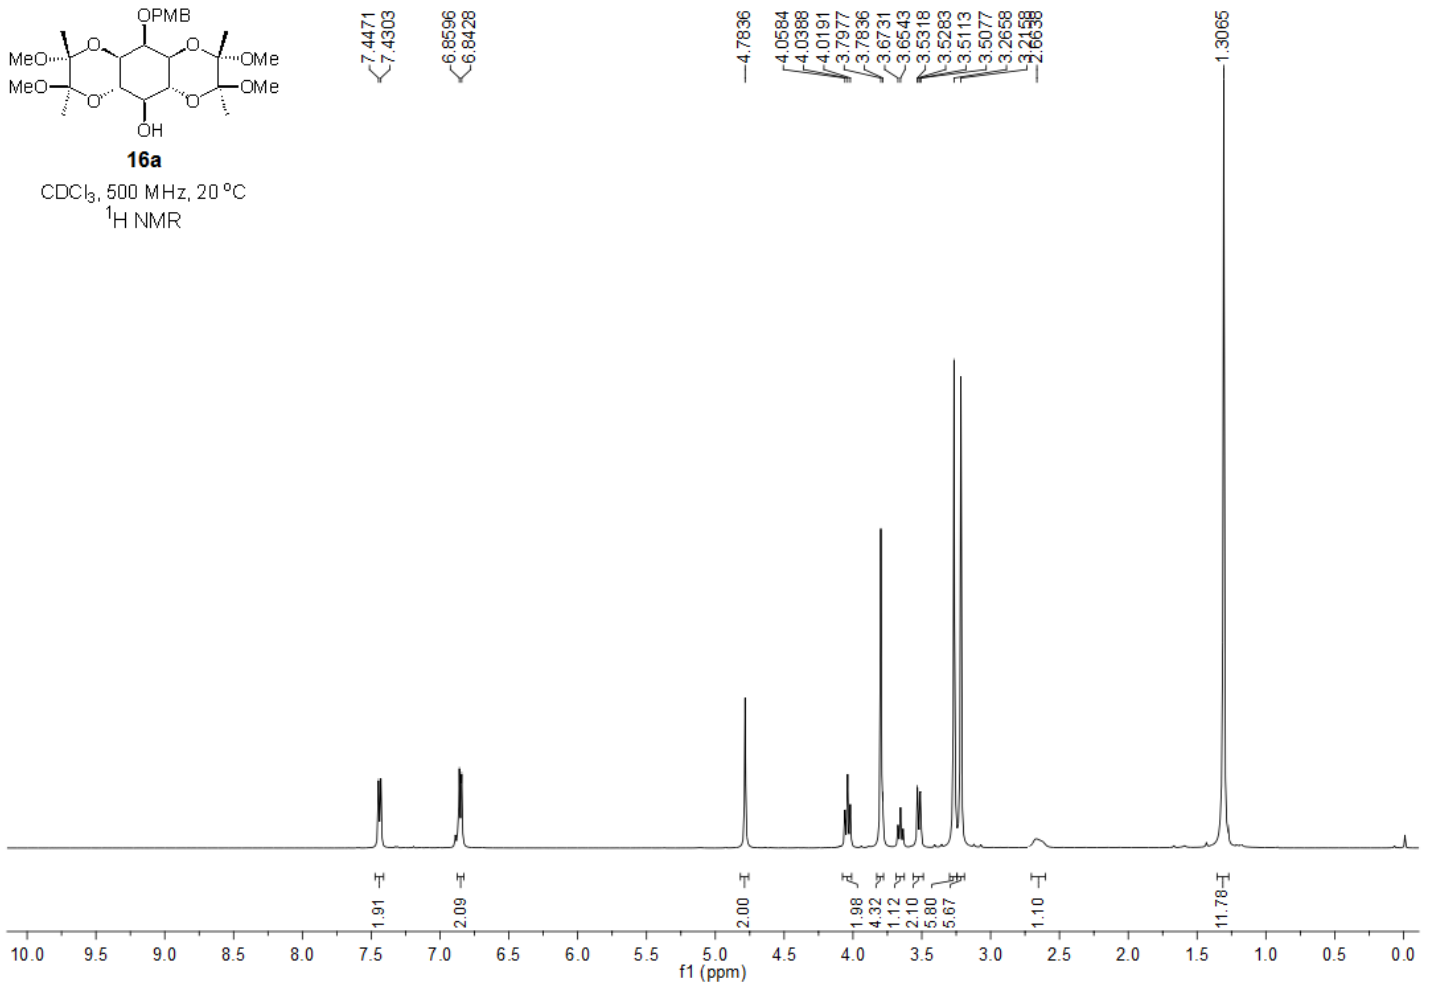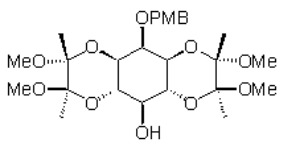

**16a**

CDCl<sub>3</sub>, 126 MHz, 20 °C  
<sup>13</sup>C NMR

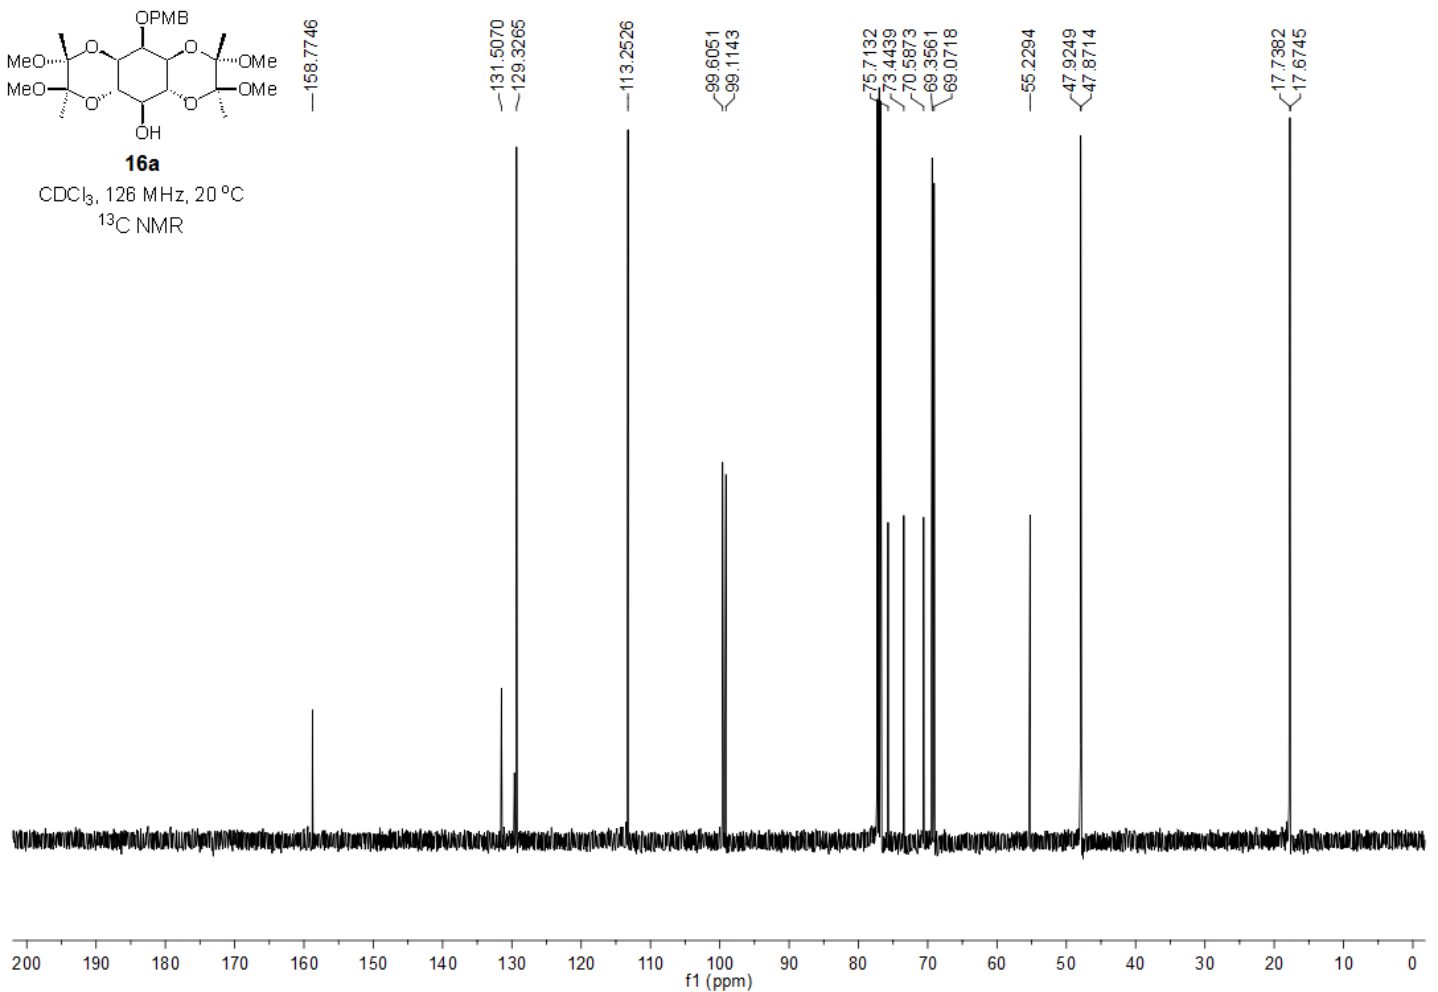

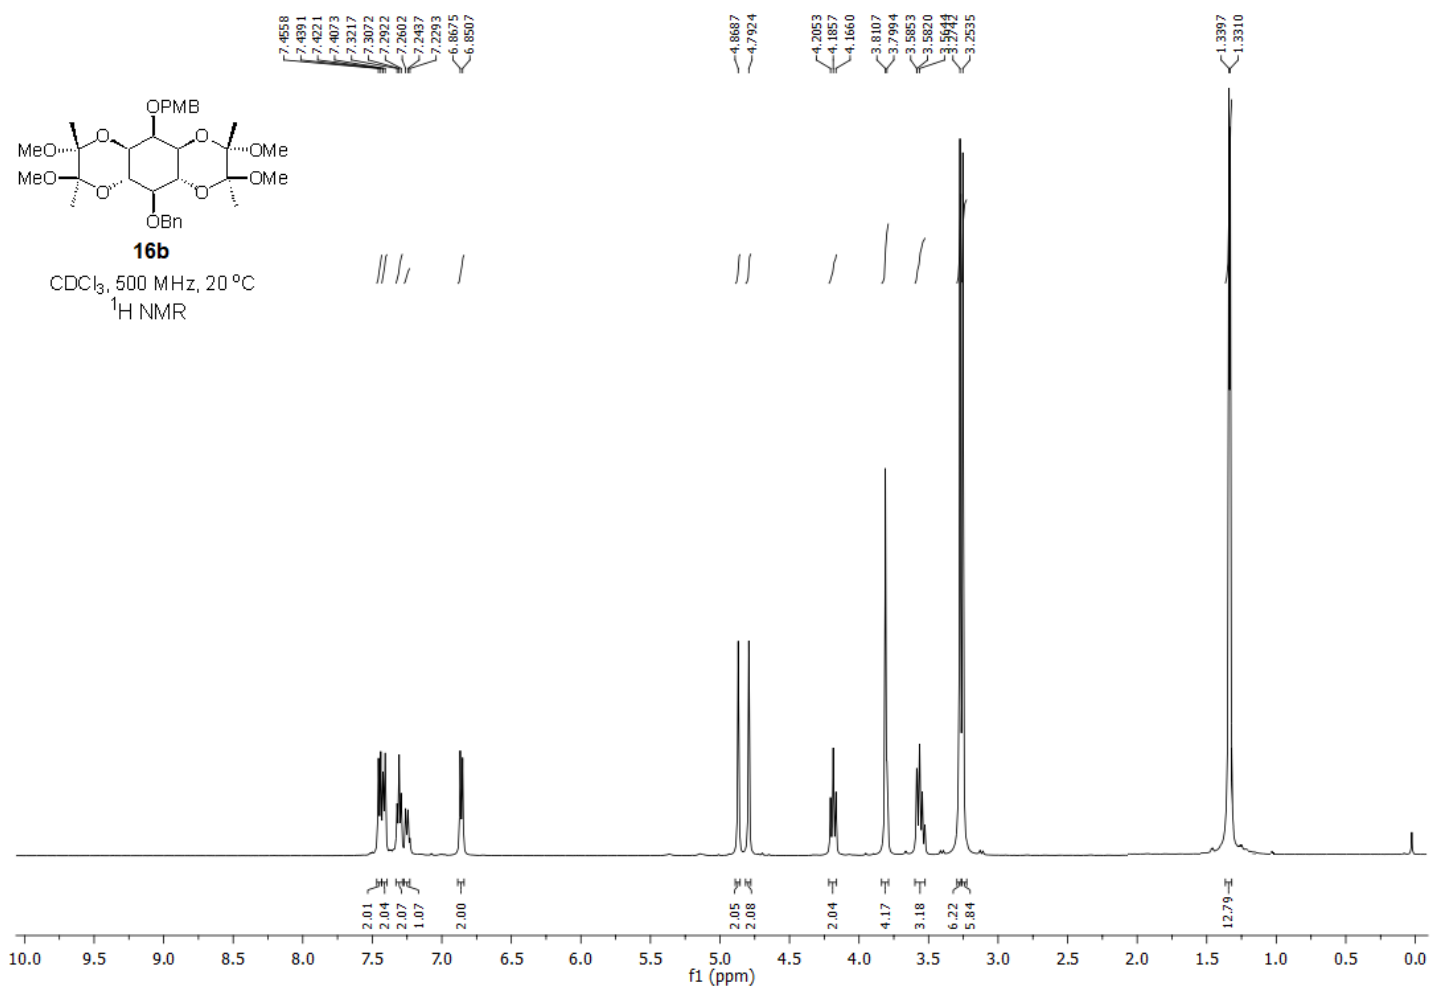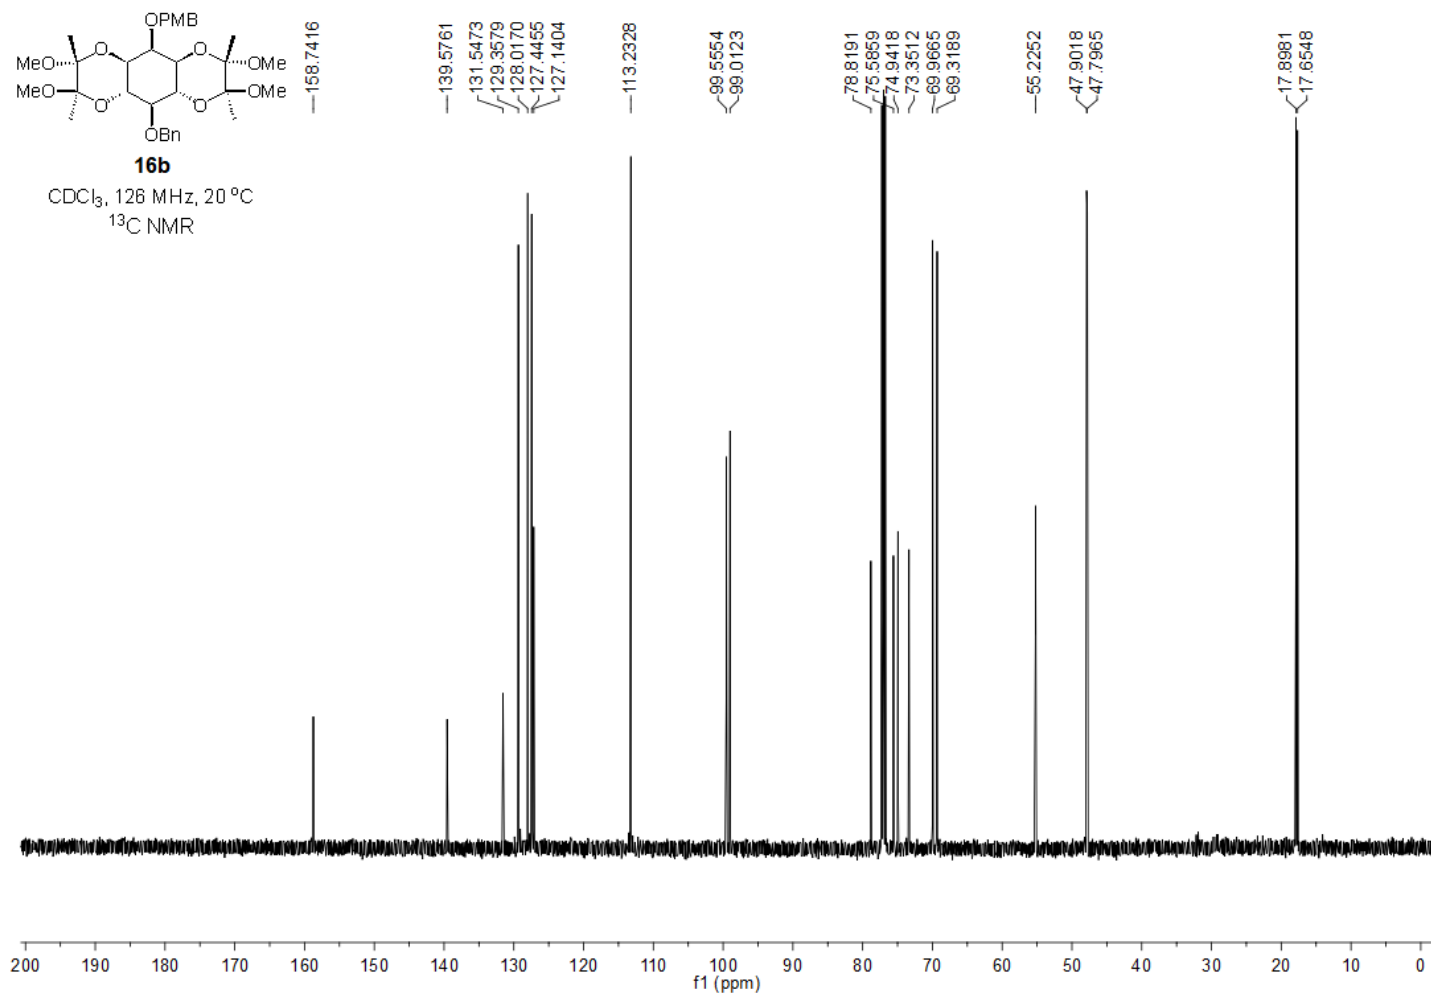



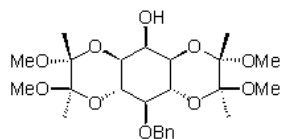

**16c**

CDCl<sub>3</sub>, 500 MHz, 20 °C

<sup>1</sup>H NMR

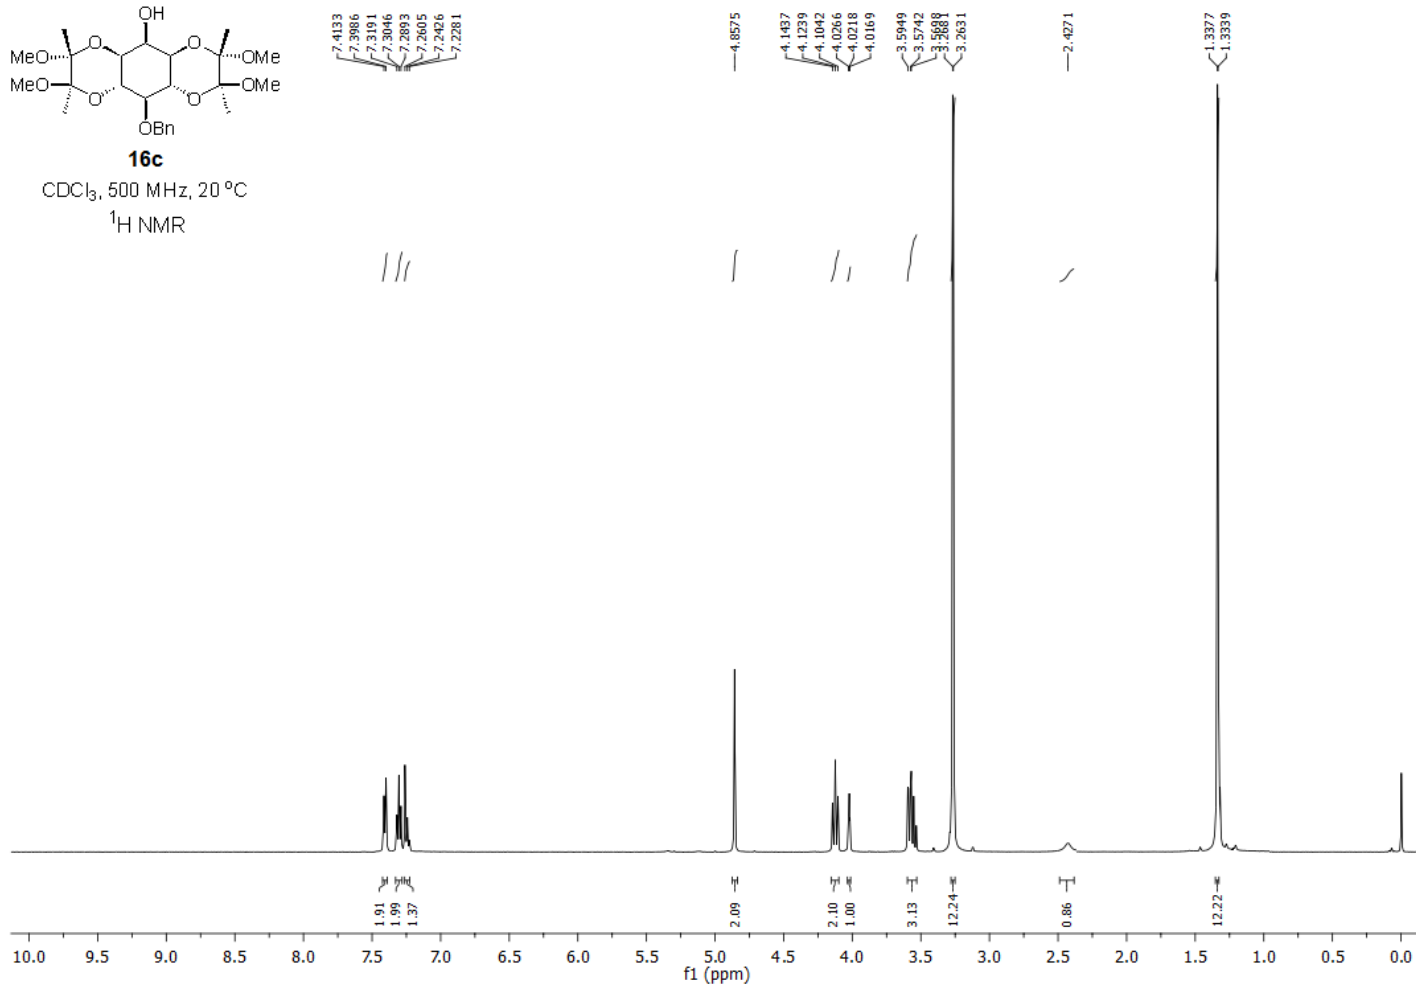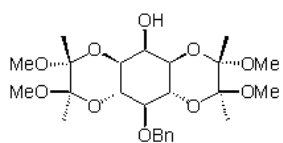

**16c**

CDCl<sub>3</sub>, 126 MHz, 20 °C

<sup>13</sup>C NMR

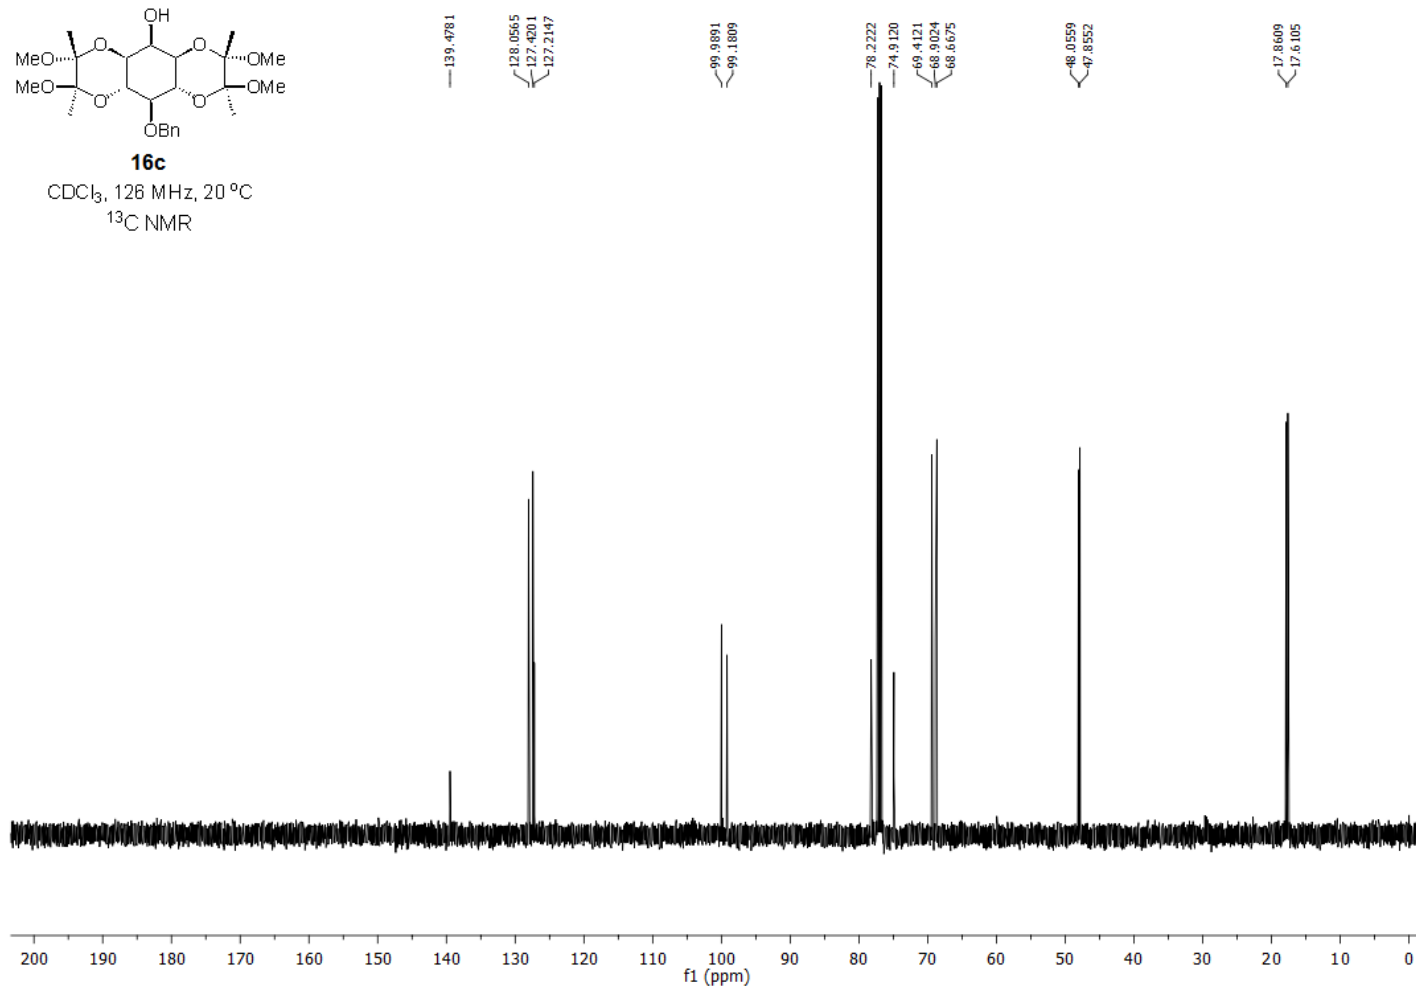



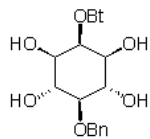

**17a**

CD<sub>3</sub>OD, 500 MHz, 20 °C  
<sup>1</sup>H NMR

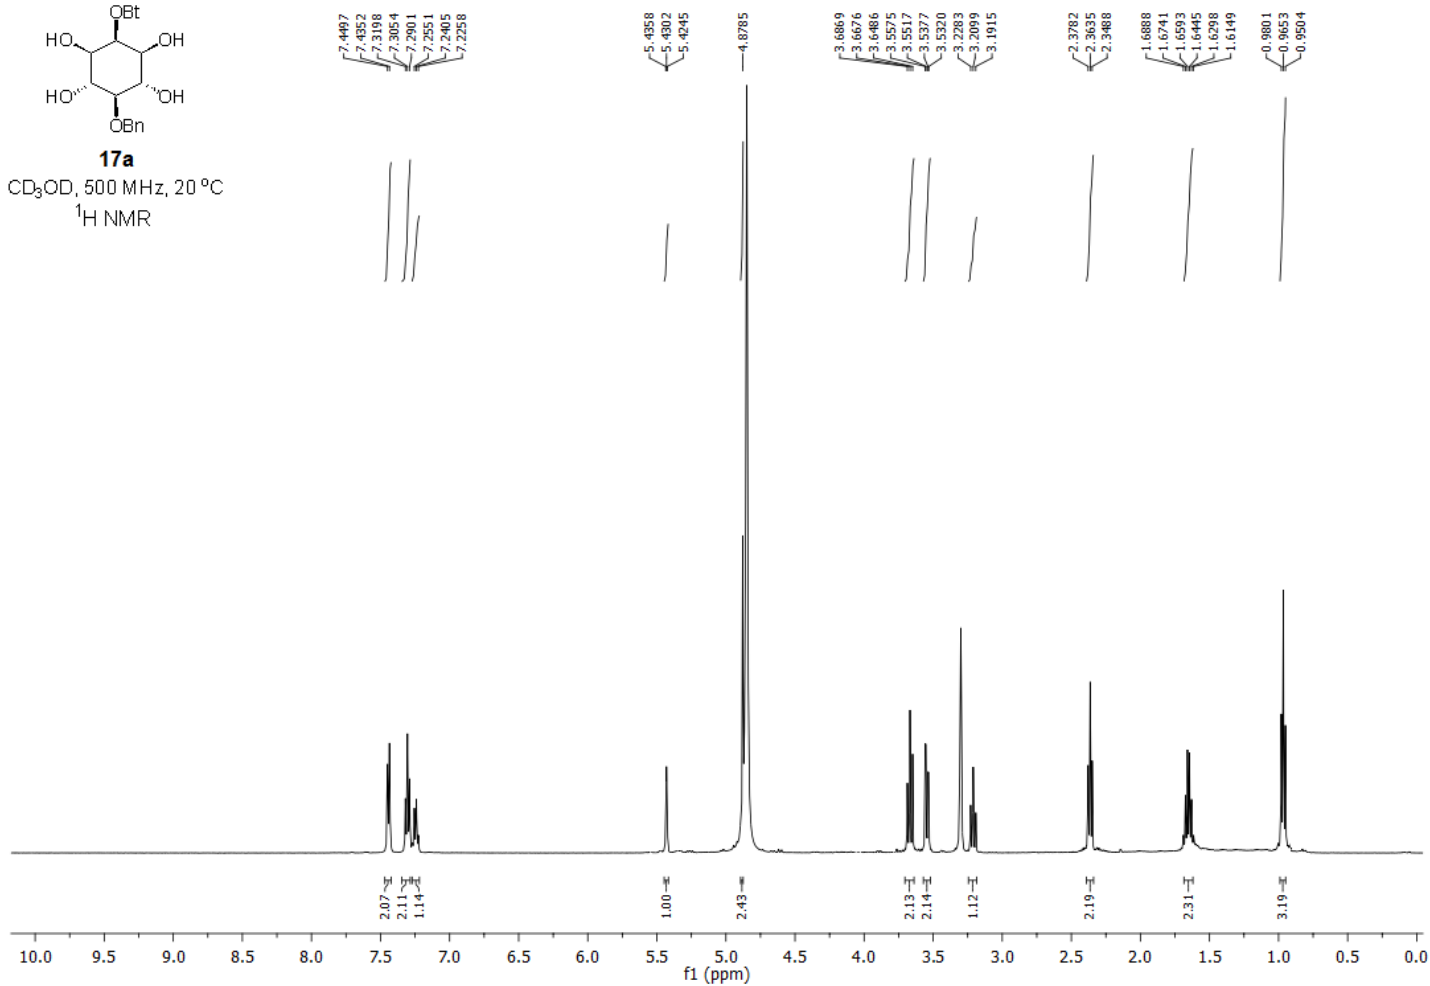

175.0771

140.4827

129.1865  
 128.5064

85.0717

76.2370  
 75.2667

74.7370  
 71.8022

37.2153

19.4723

14.0394

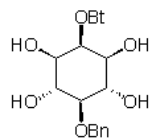

**17a**

CD<sub>3</sub>OD, 126 MHz, 20 °C  
<sup>13</sup>C NMR

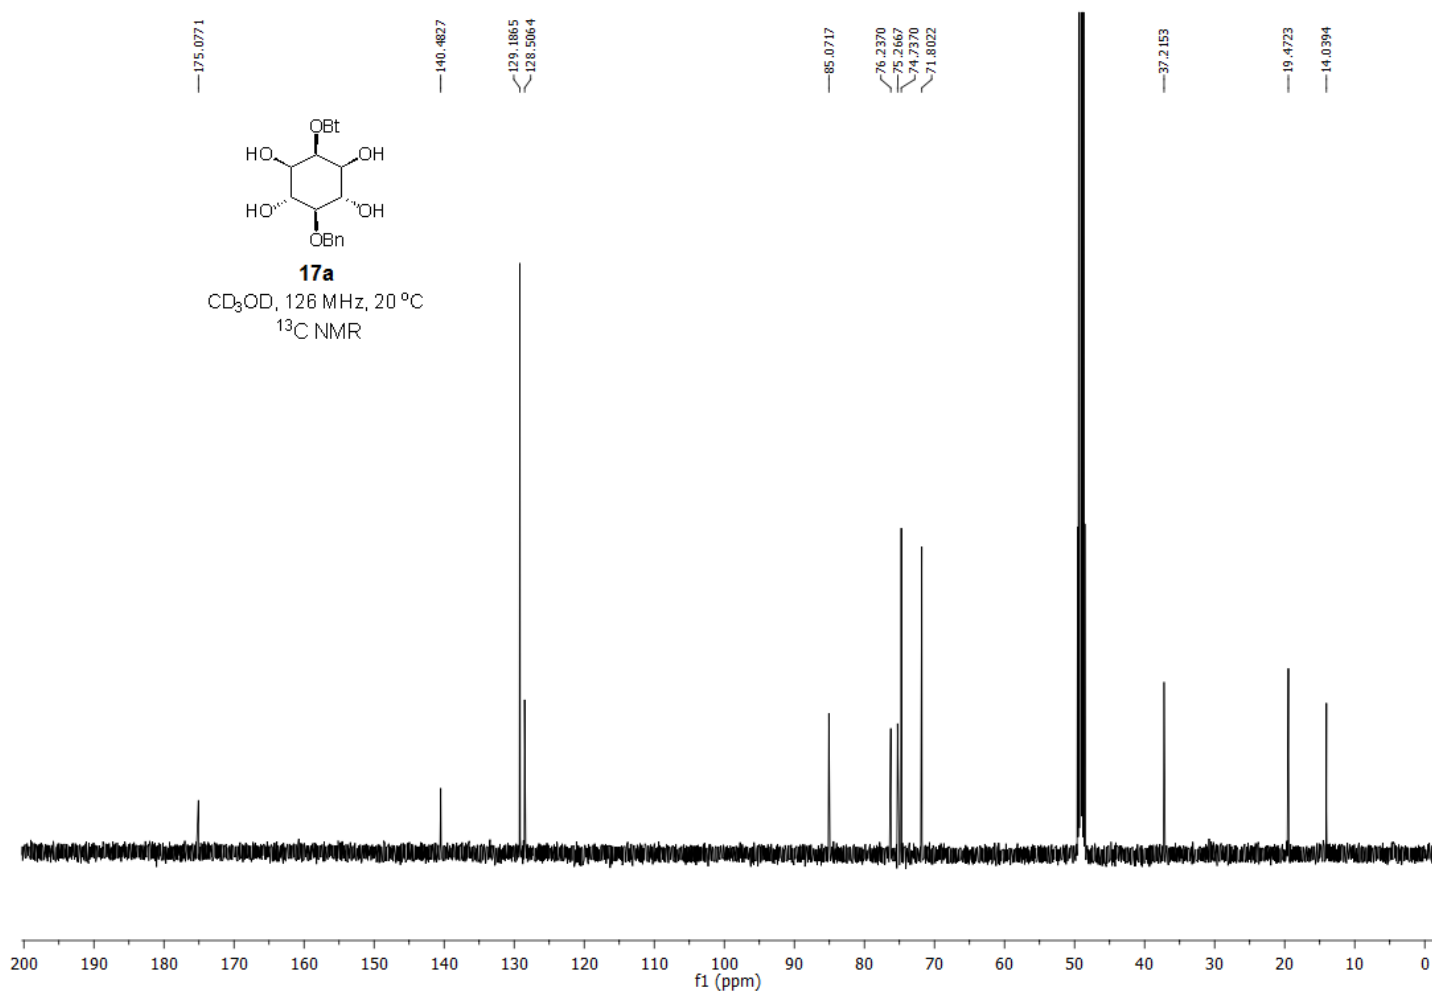

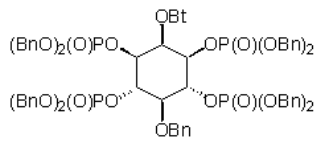

CDCl<sub>3</sub>, 500 MHz, 20 °C  
<sup>1</sup>H NMR

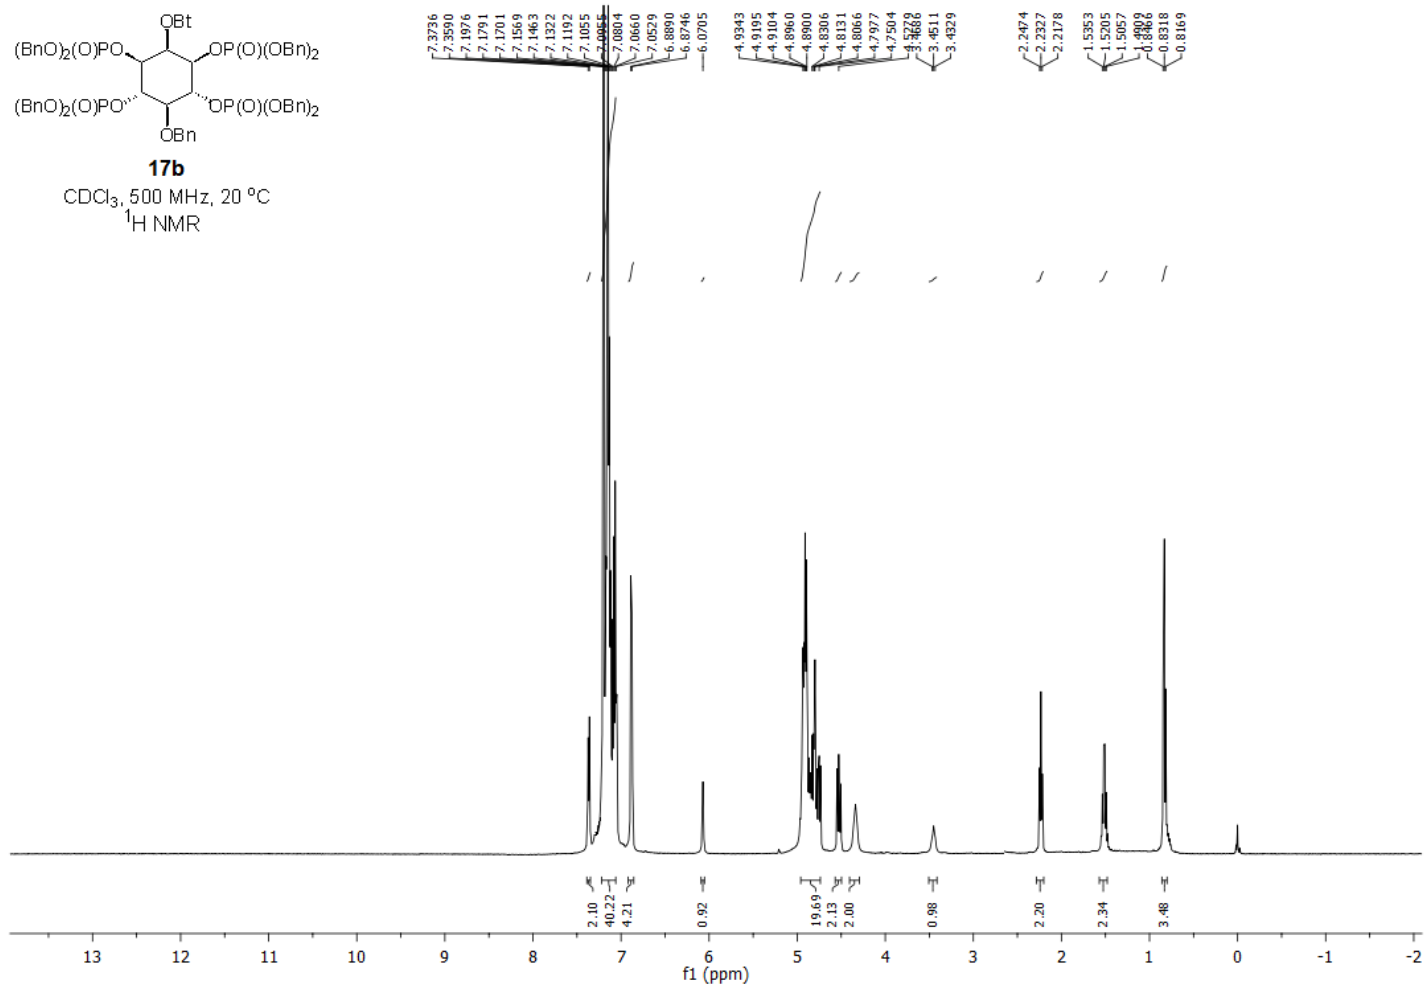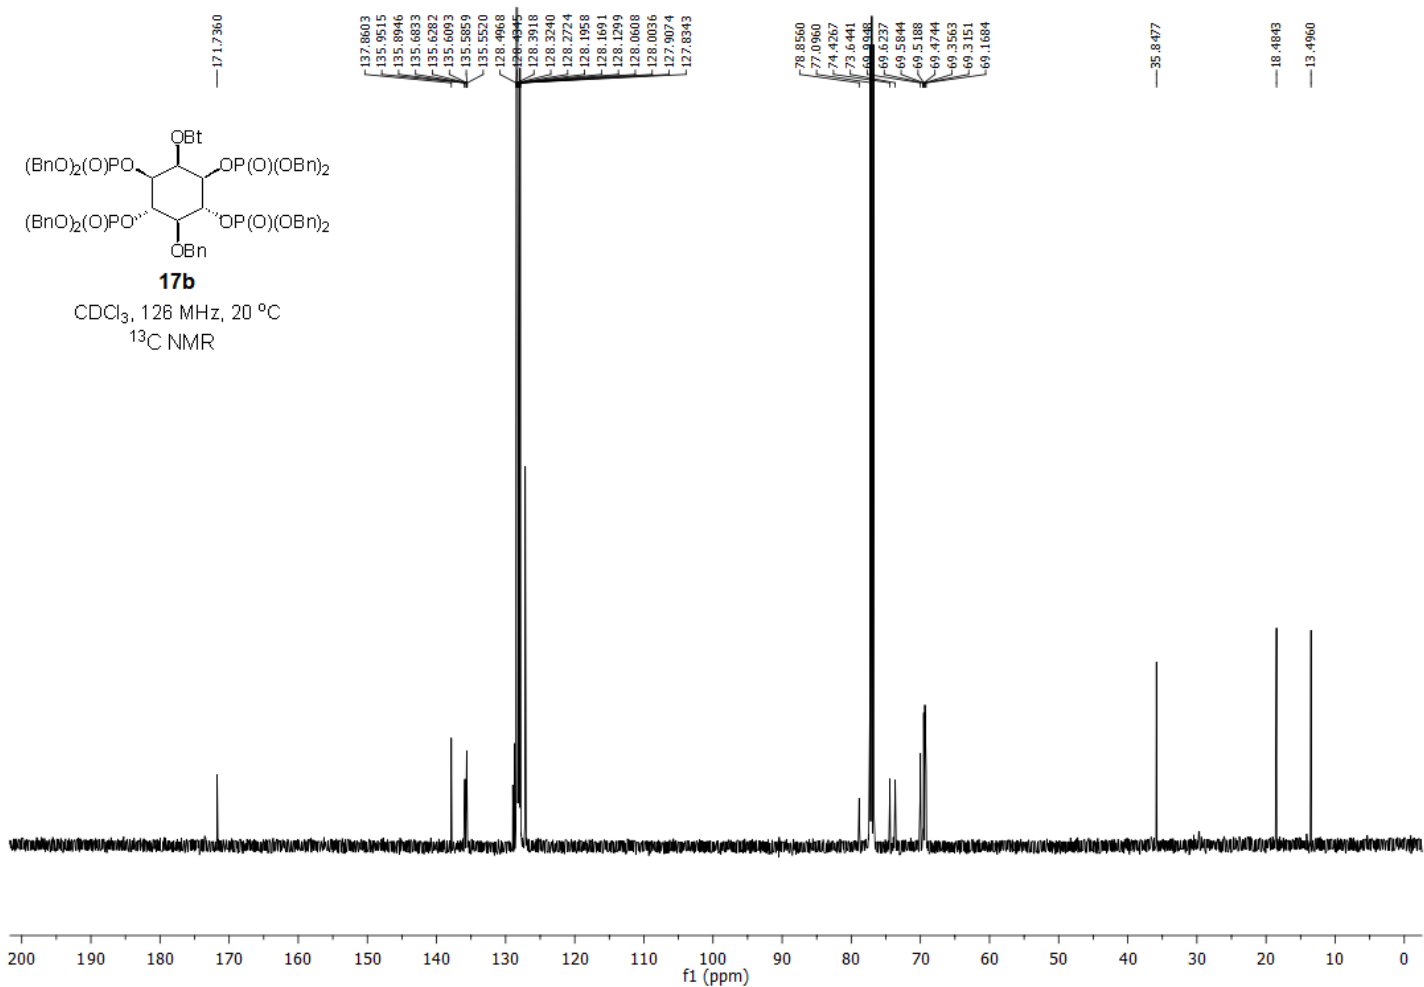



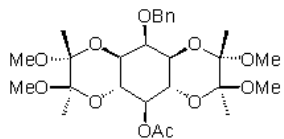

**22**

CDCl<sub>3</sub>, 500 MHz, 20 °C  
<sup>1</sup>H NMR

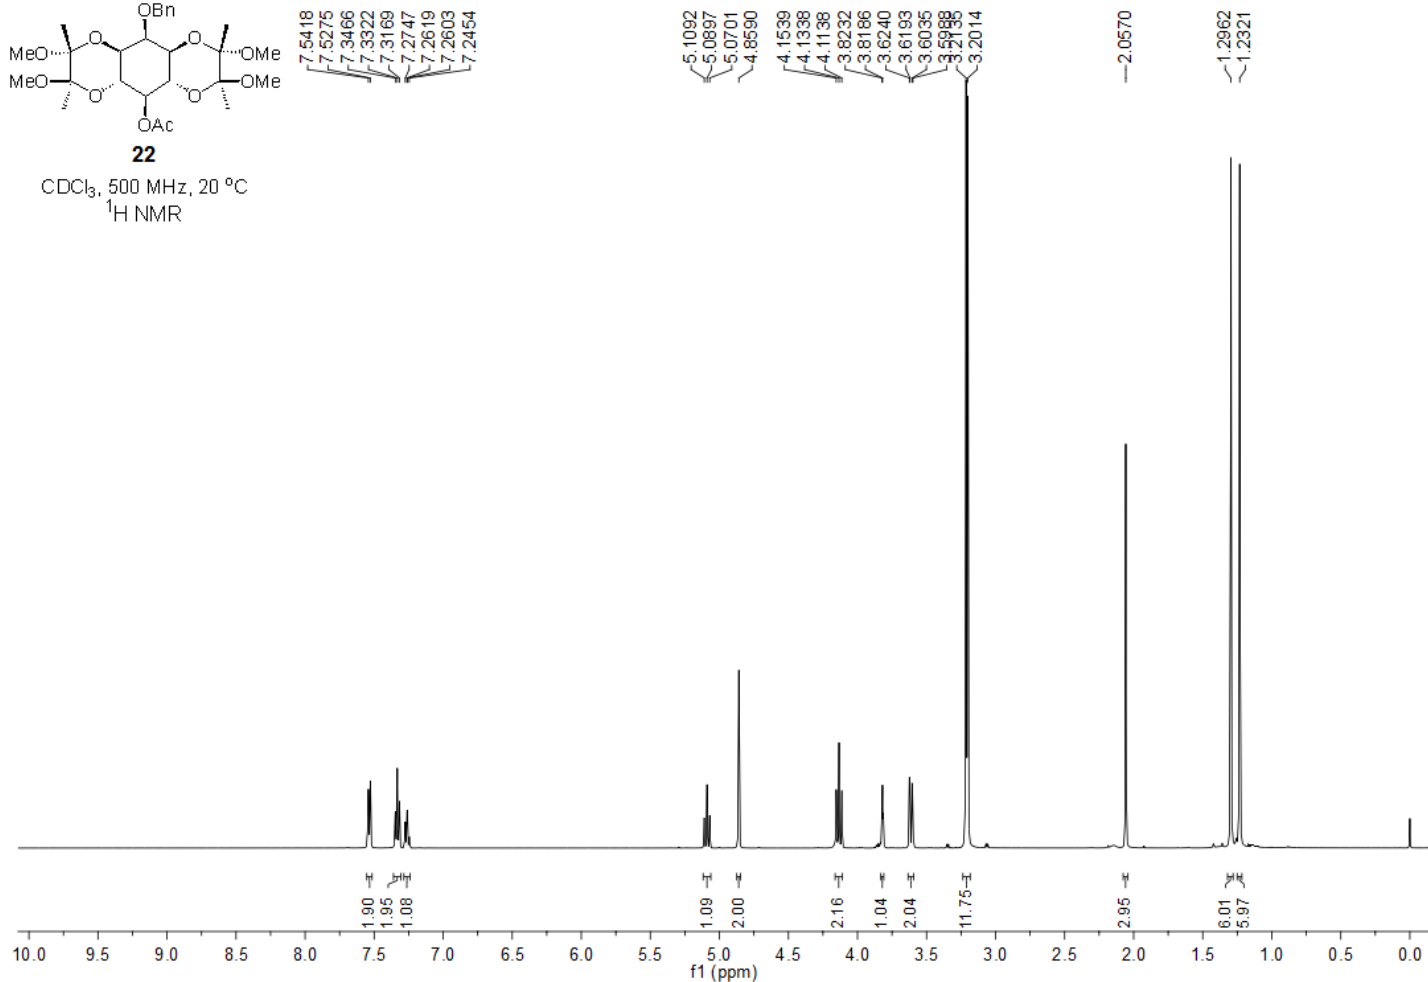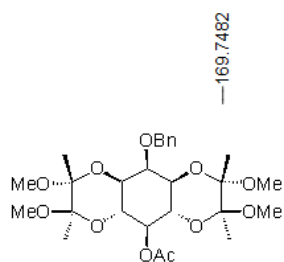

**22**

CDCl<sub>3</sub>, 75 MHz, 20 °C  
<sup>13</sup>C NMR

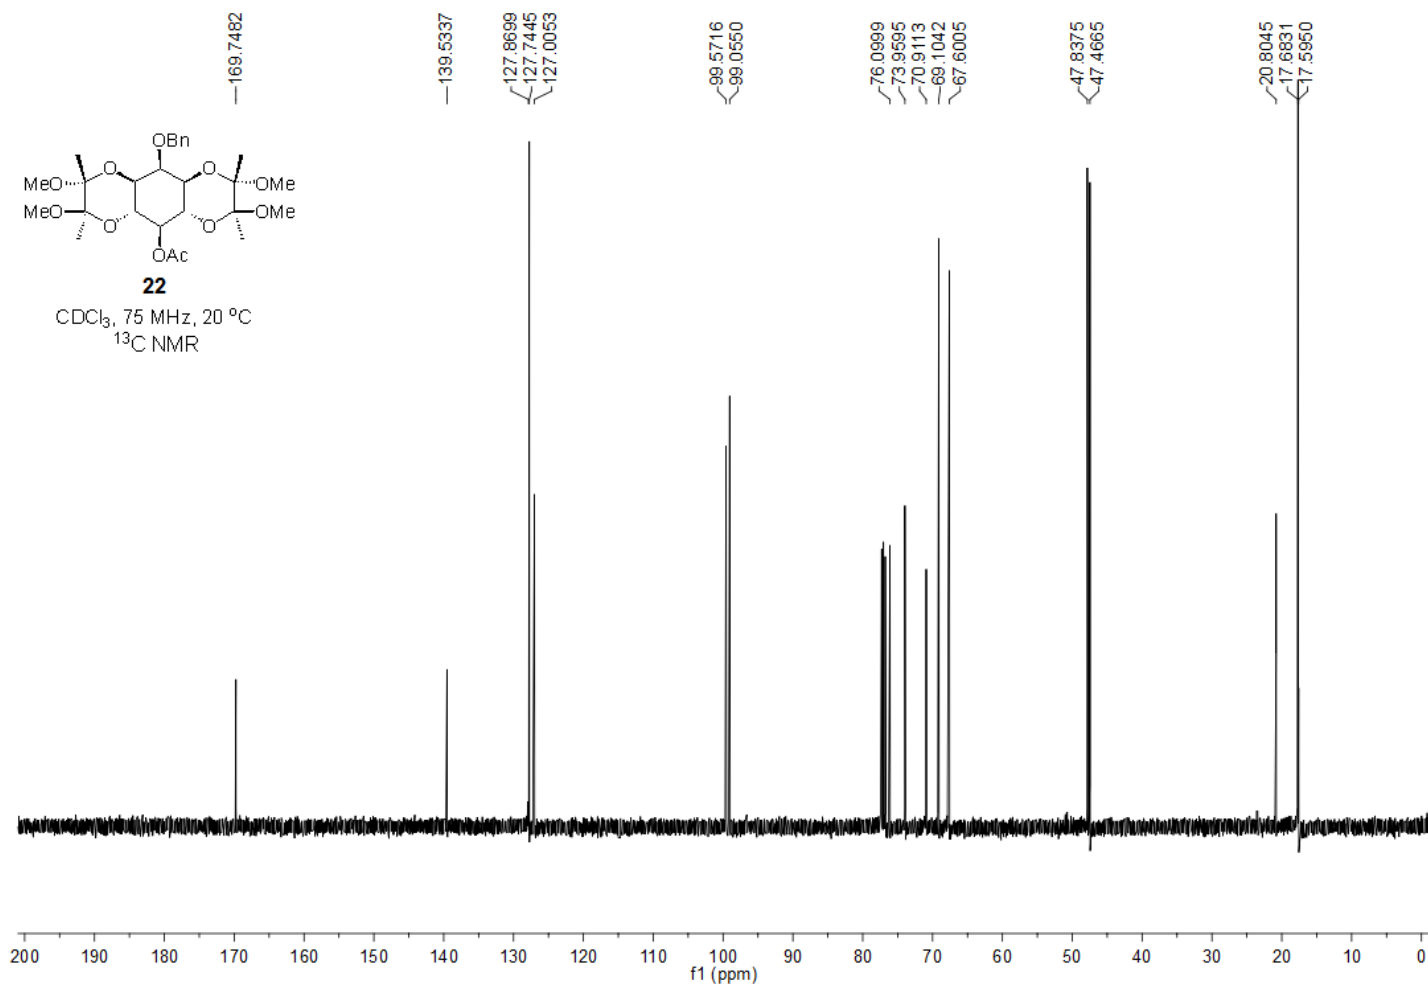

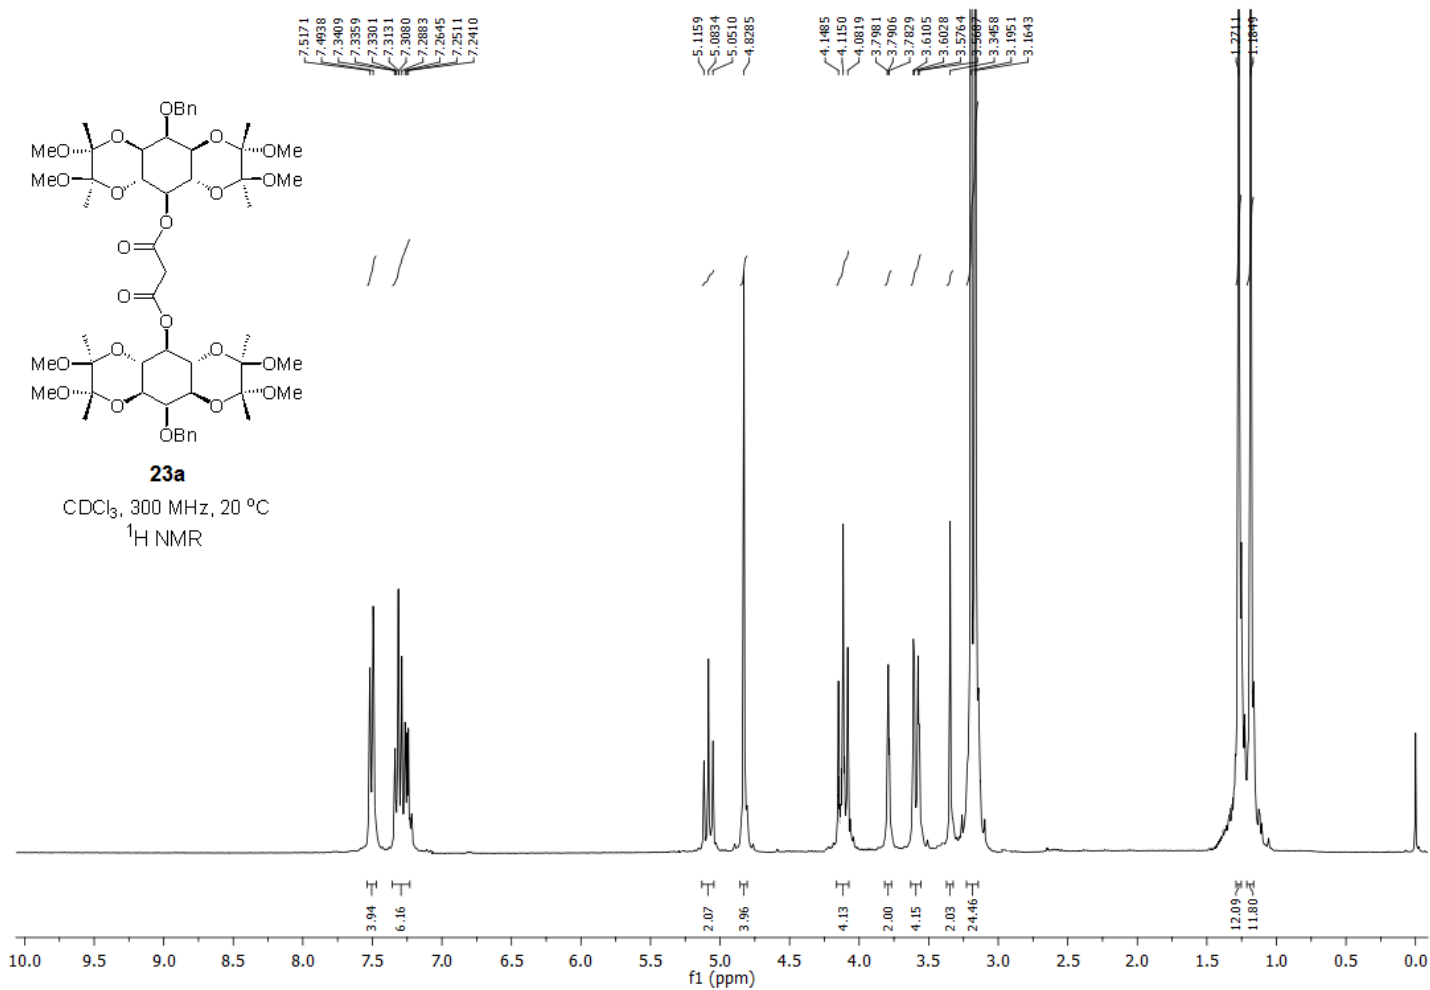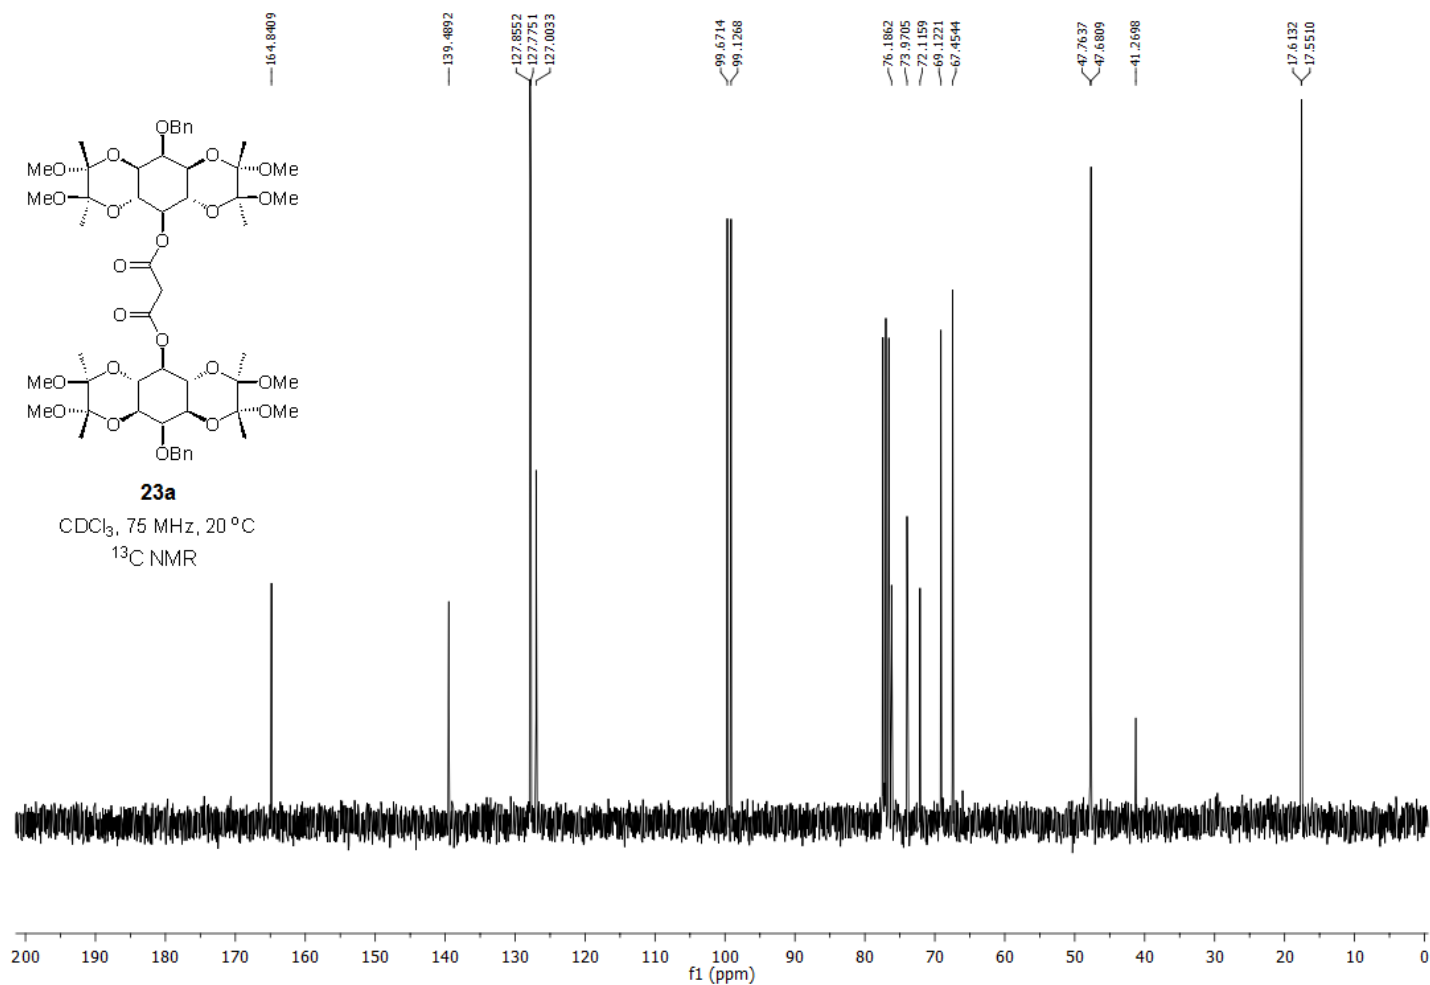

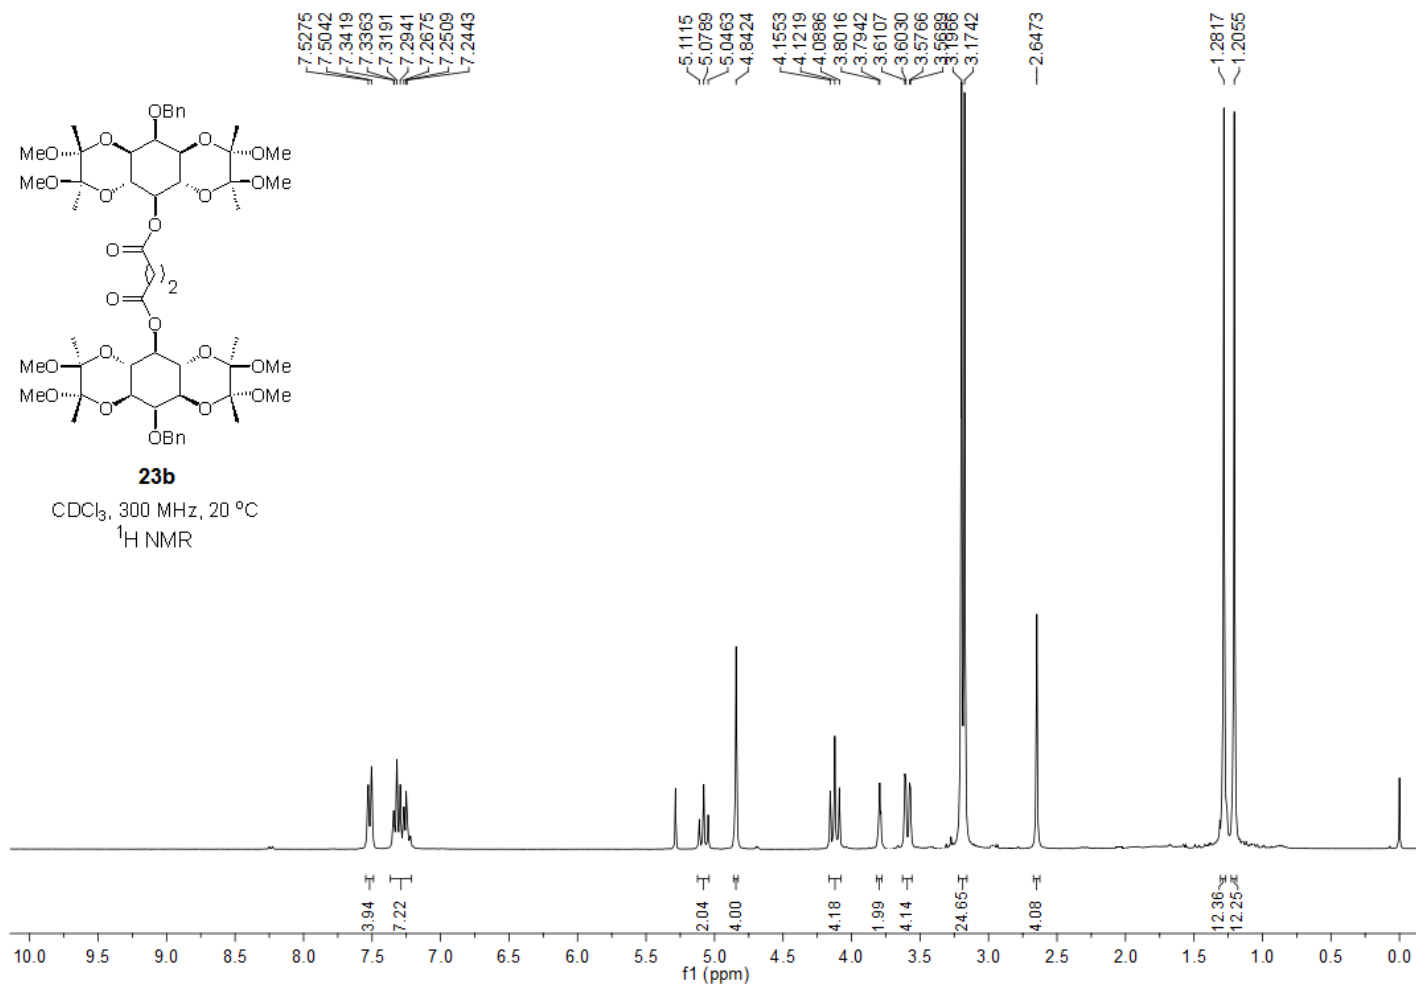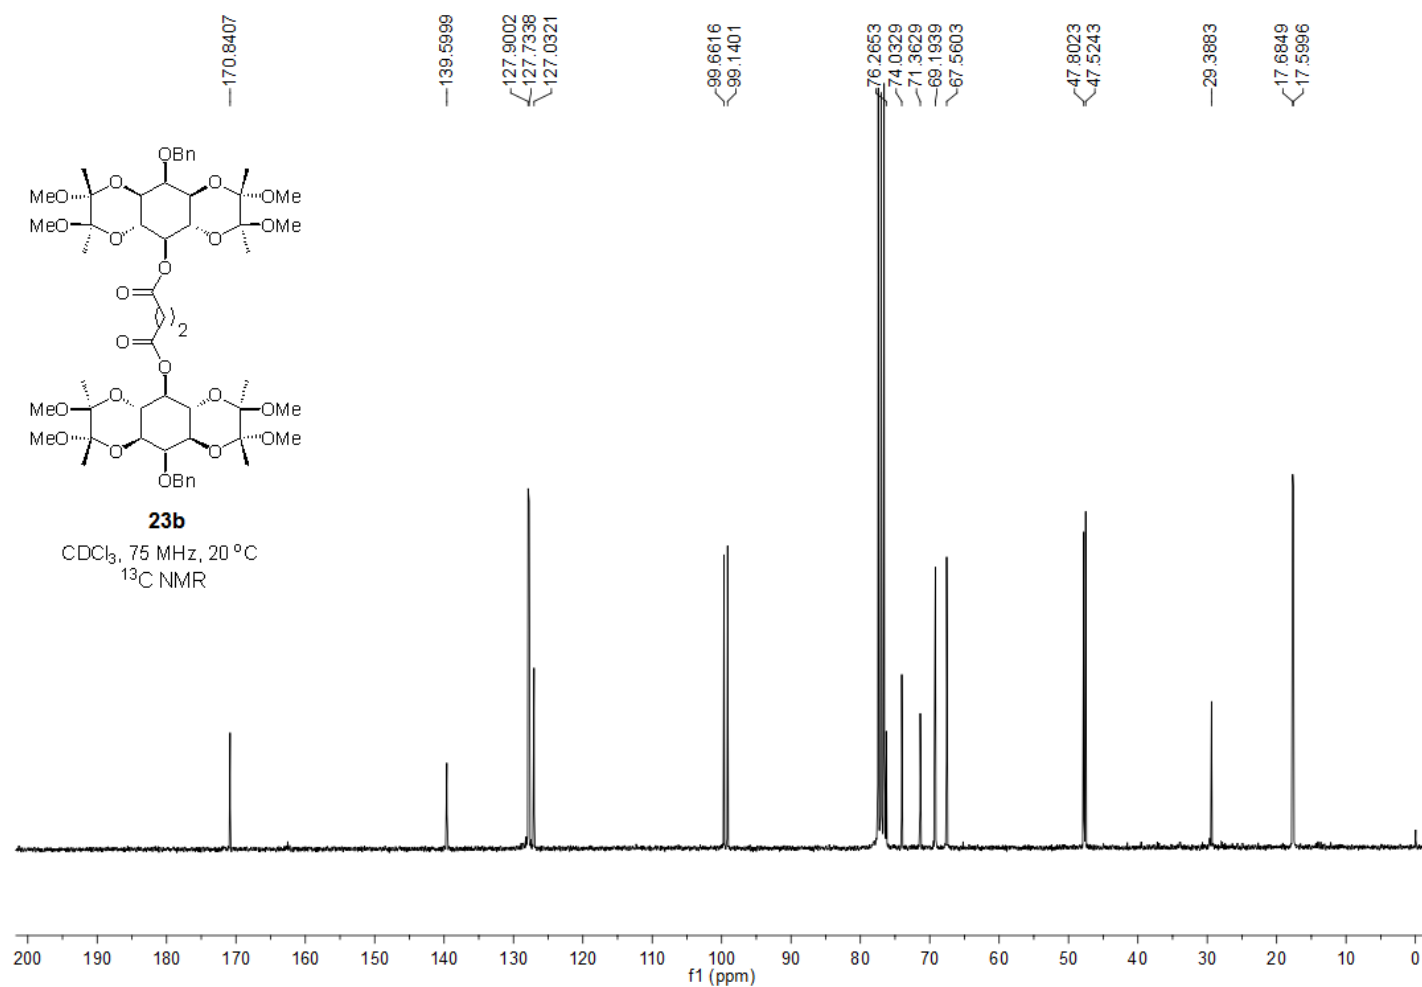



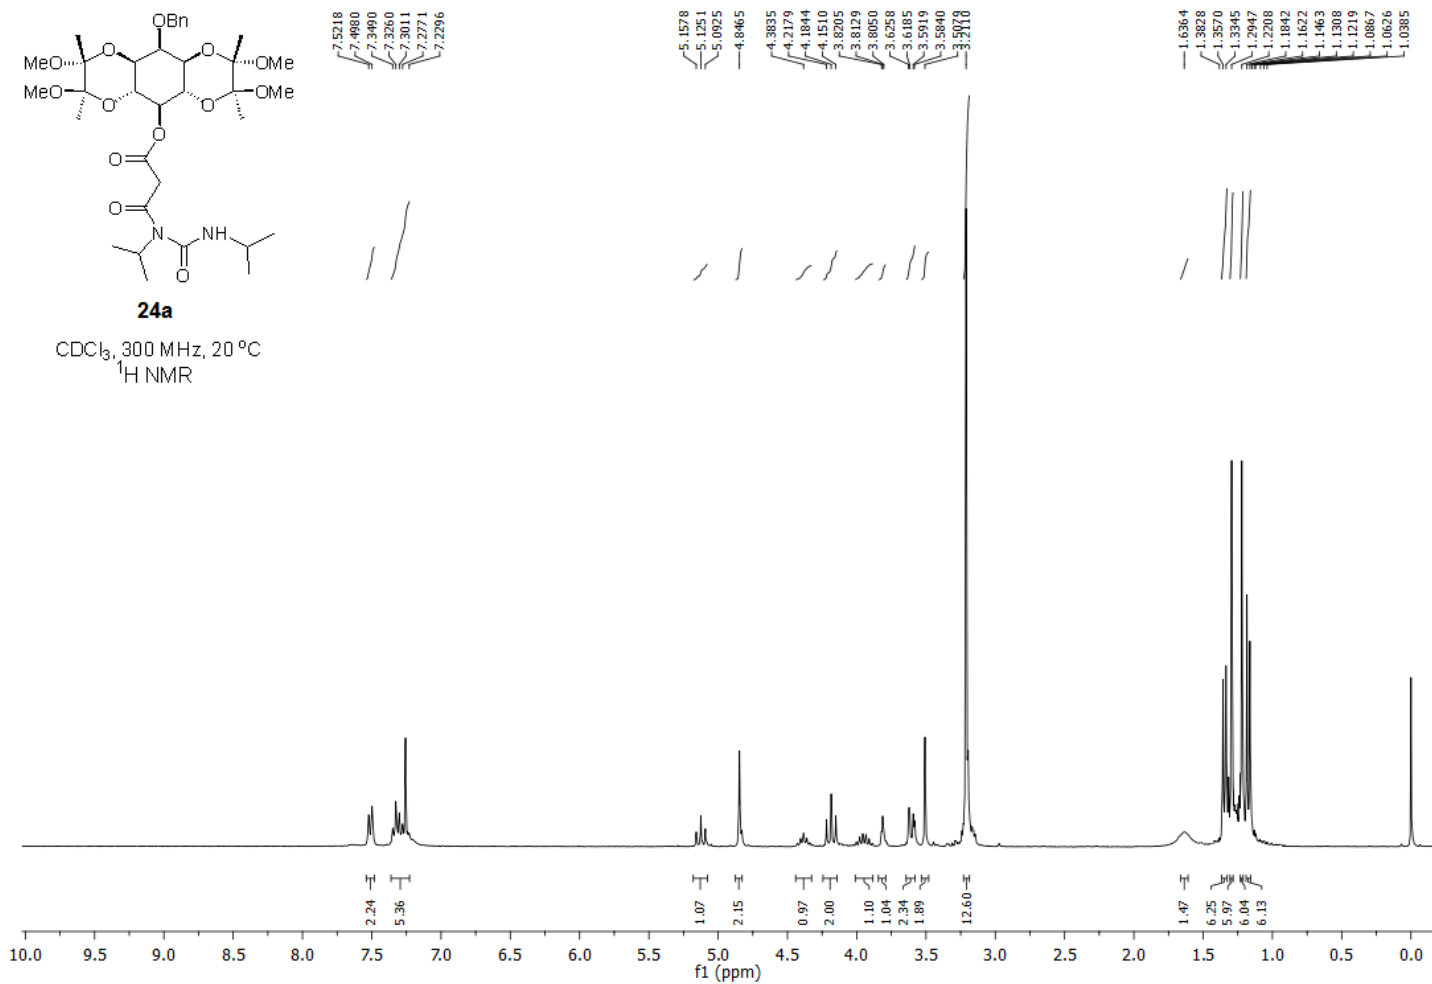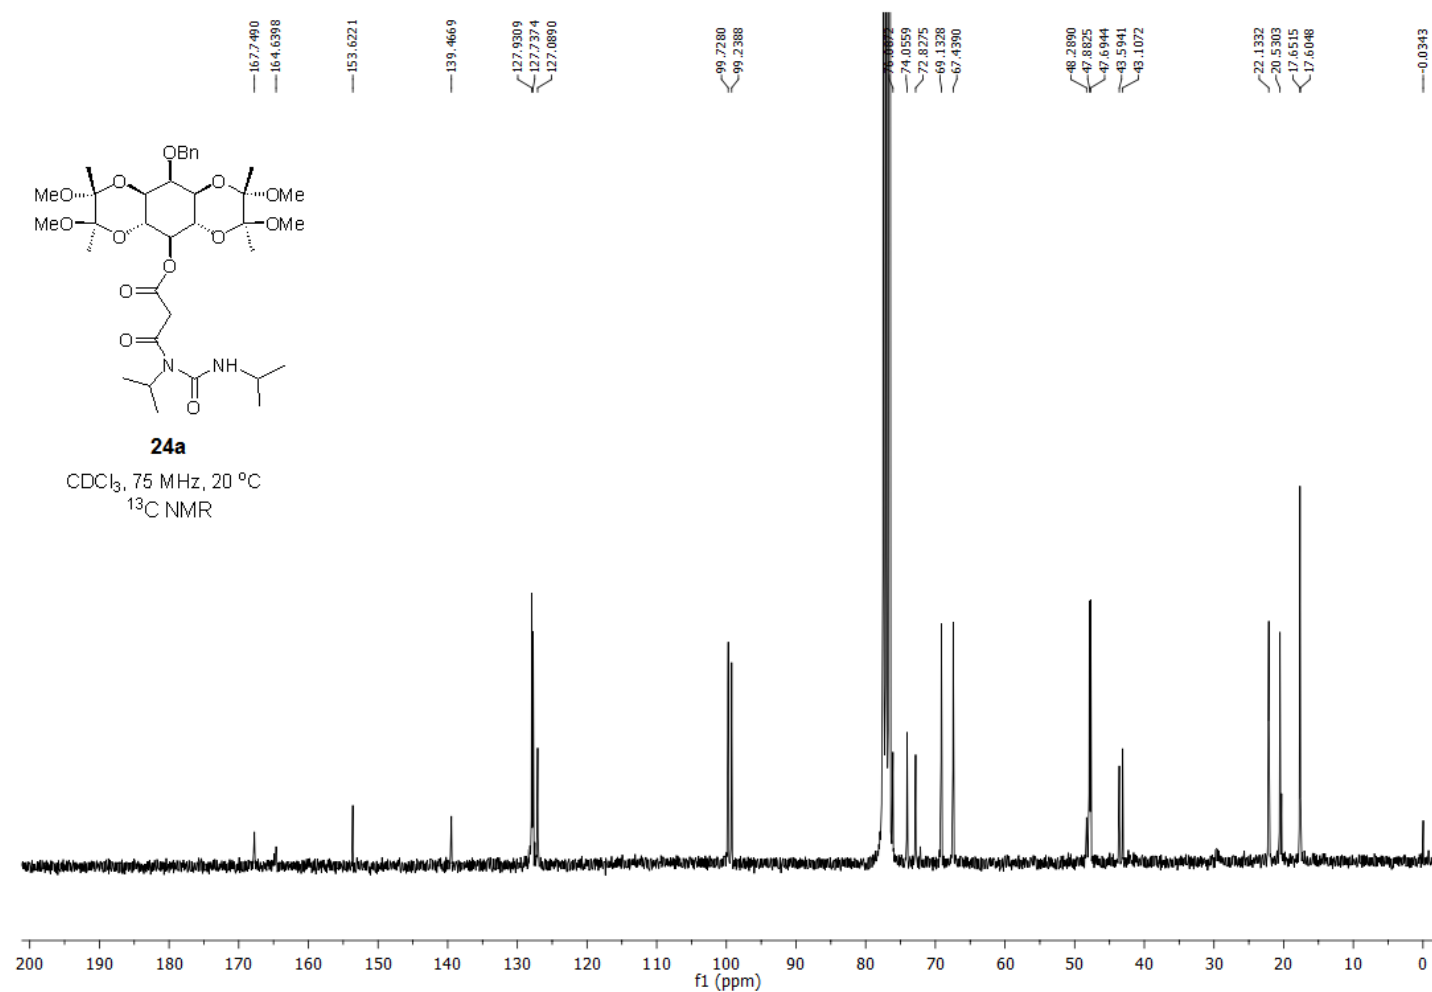

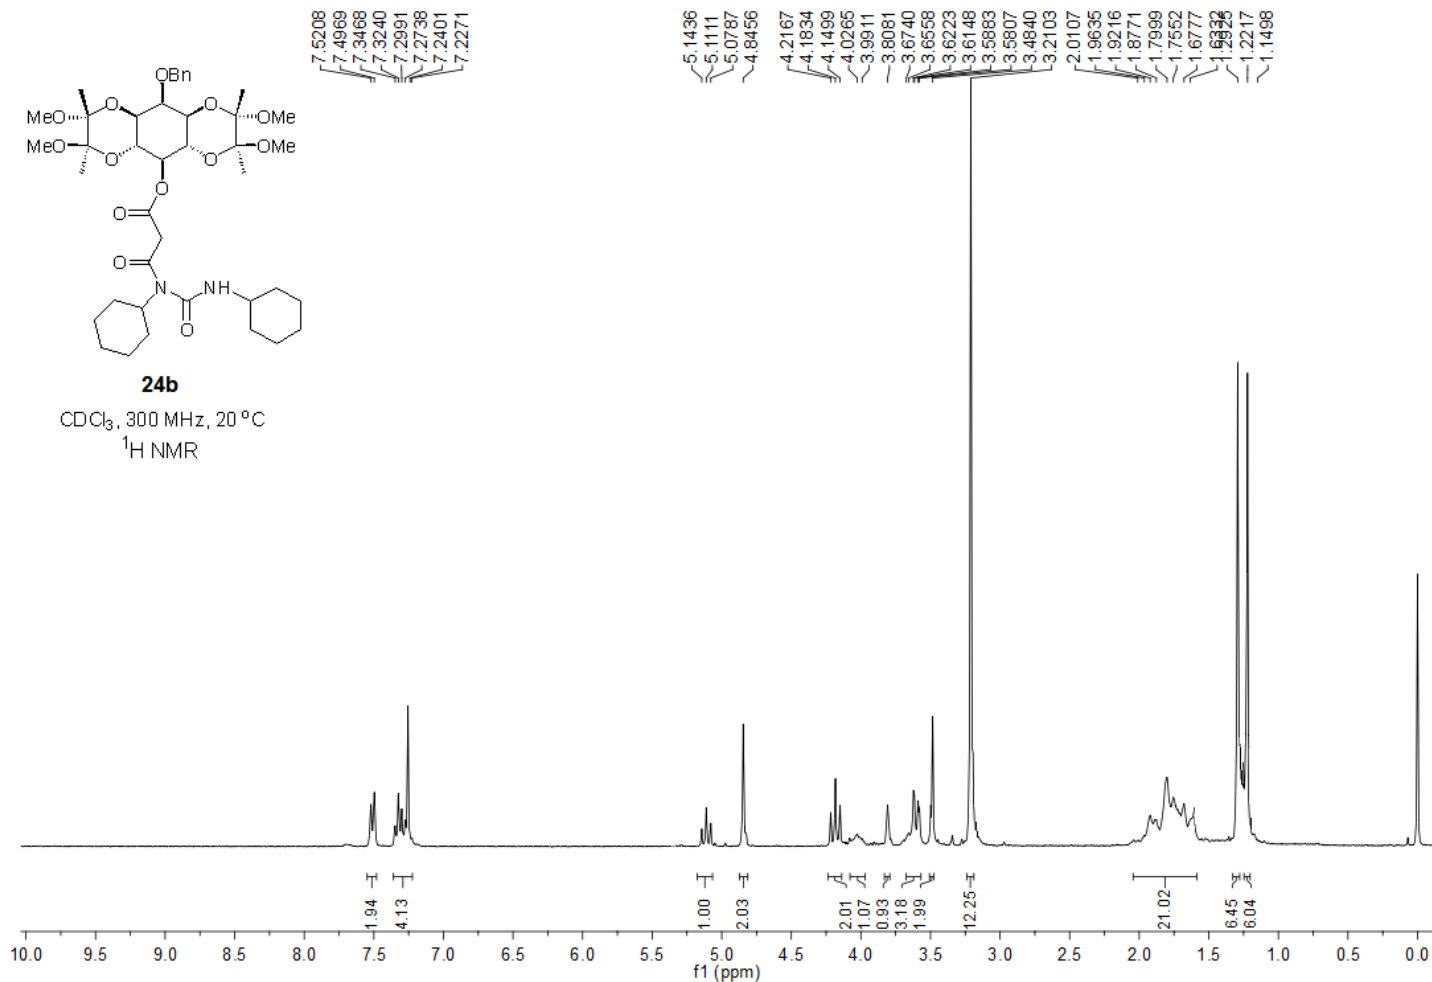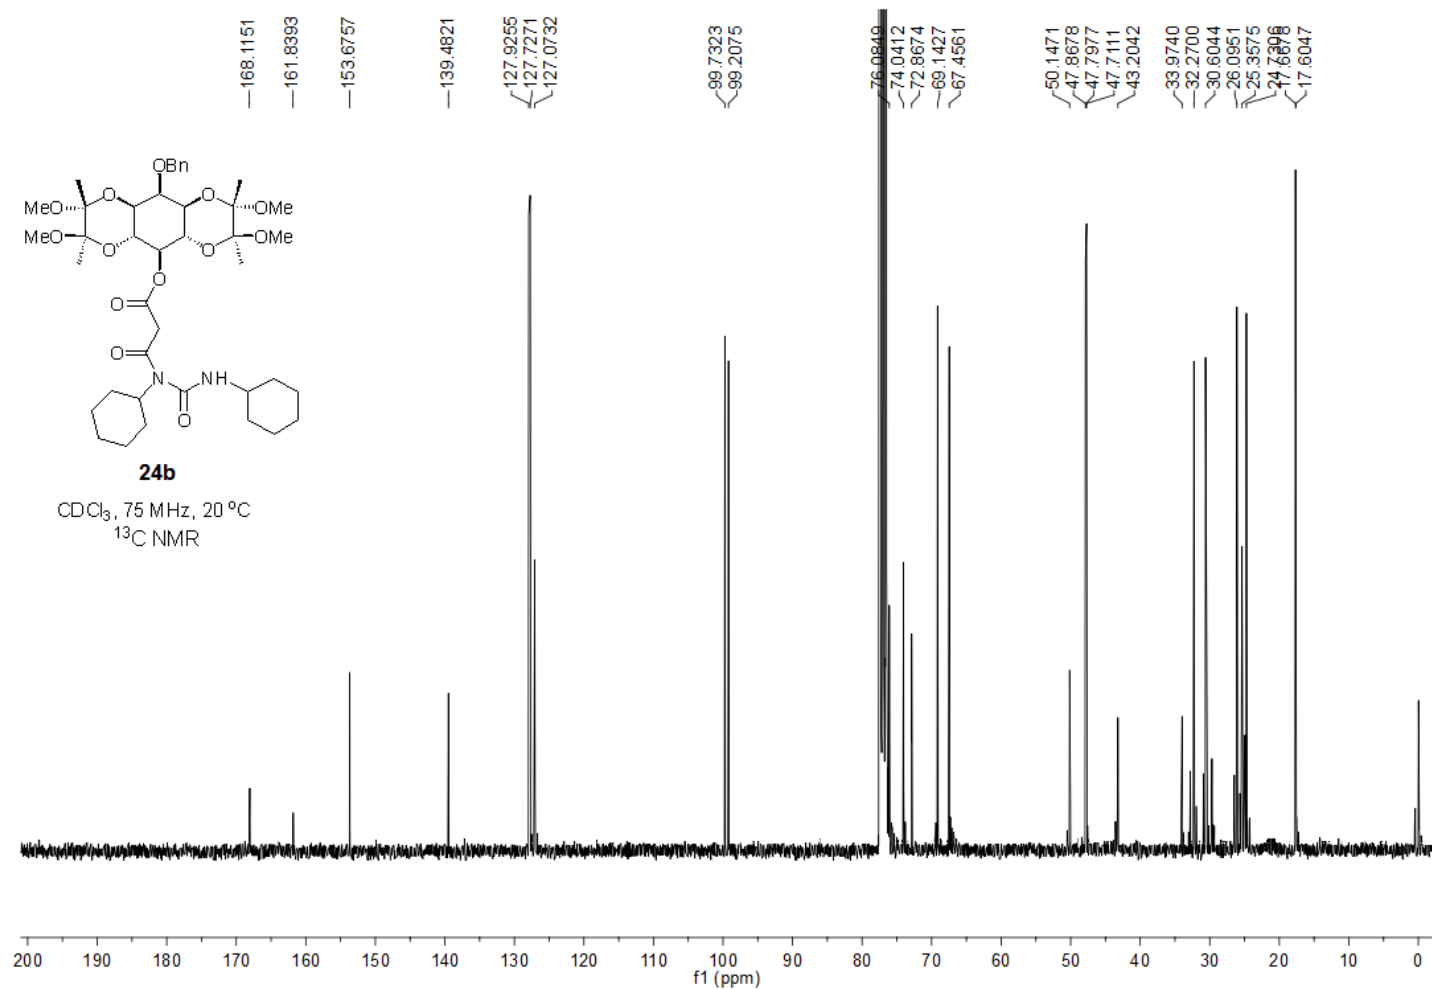

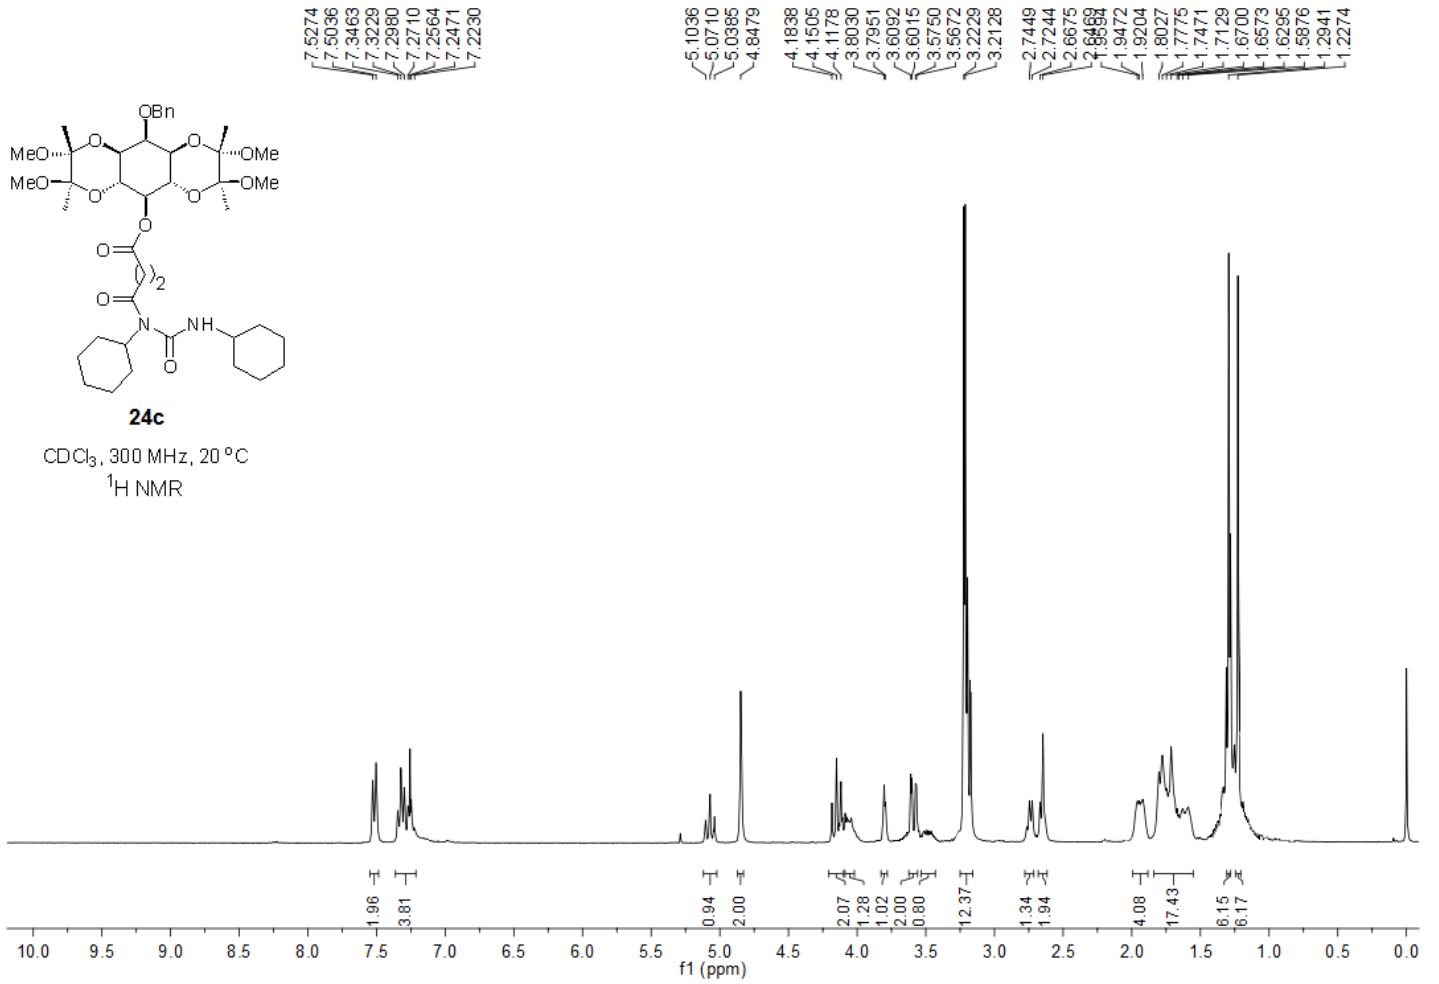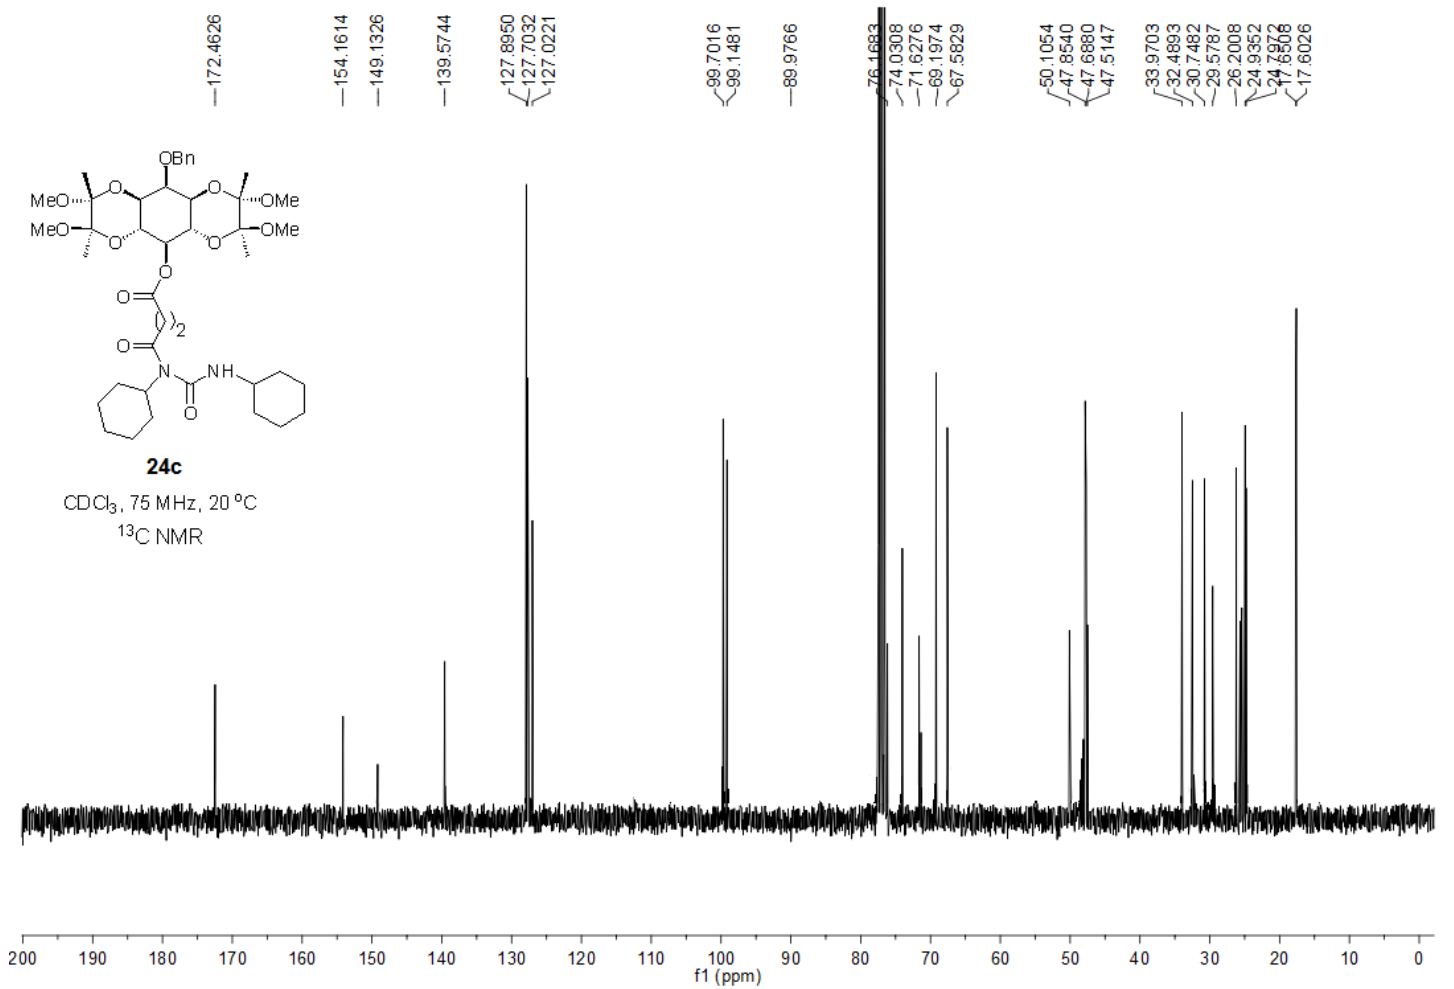

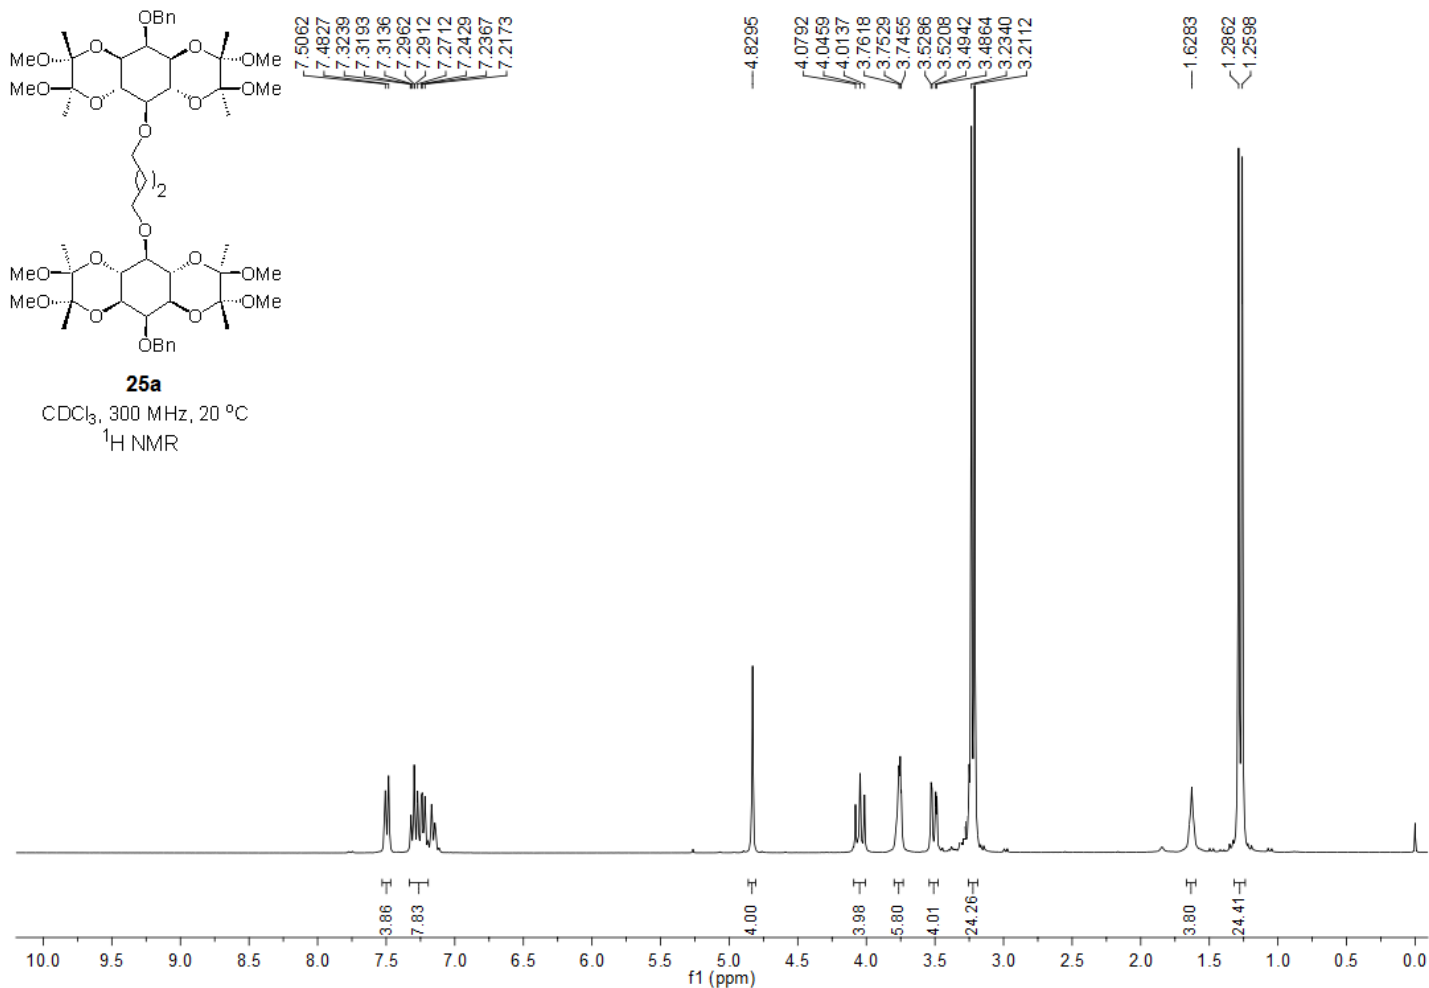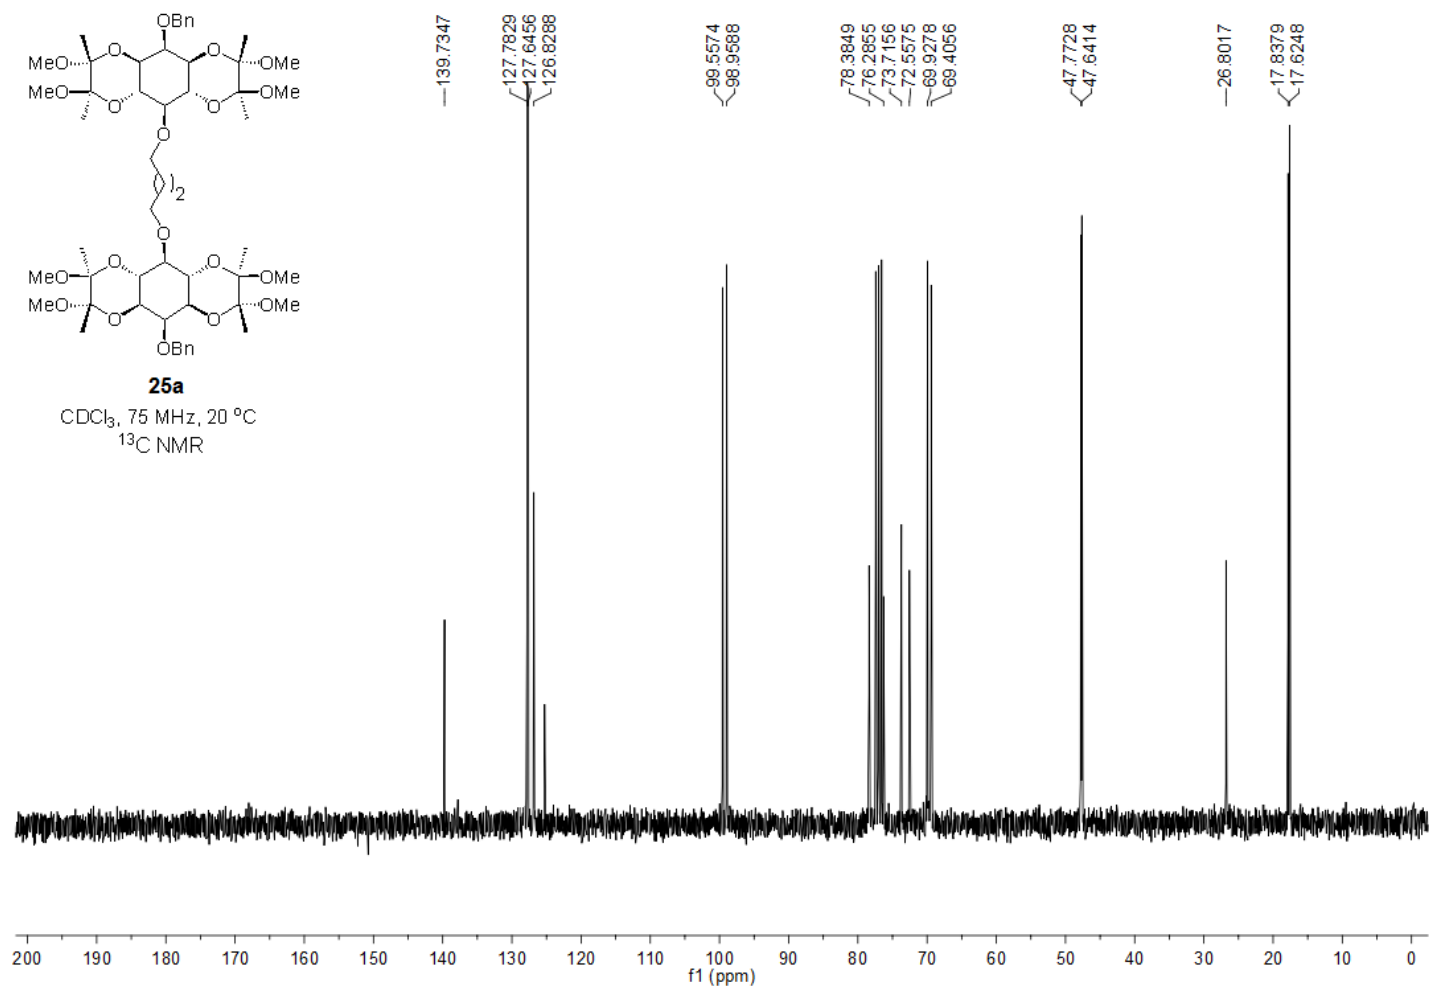

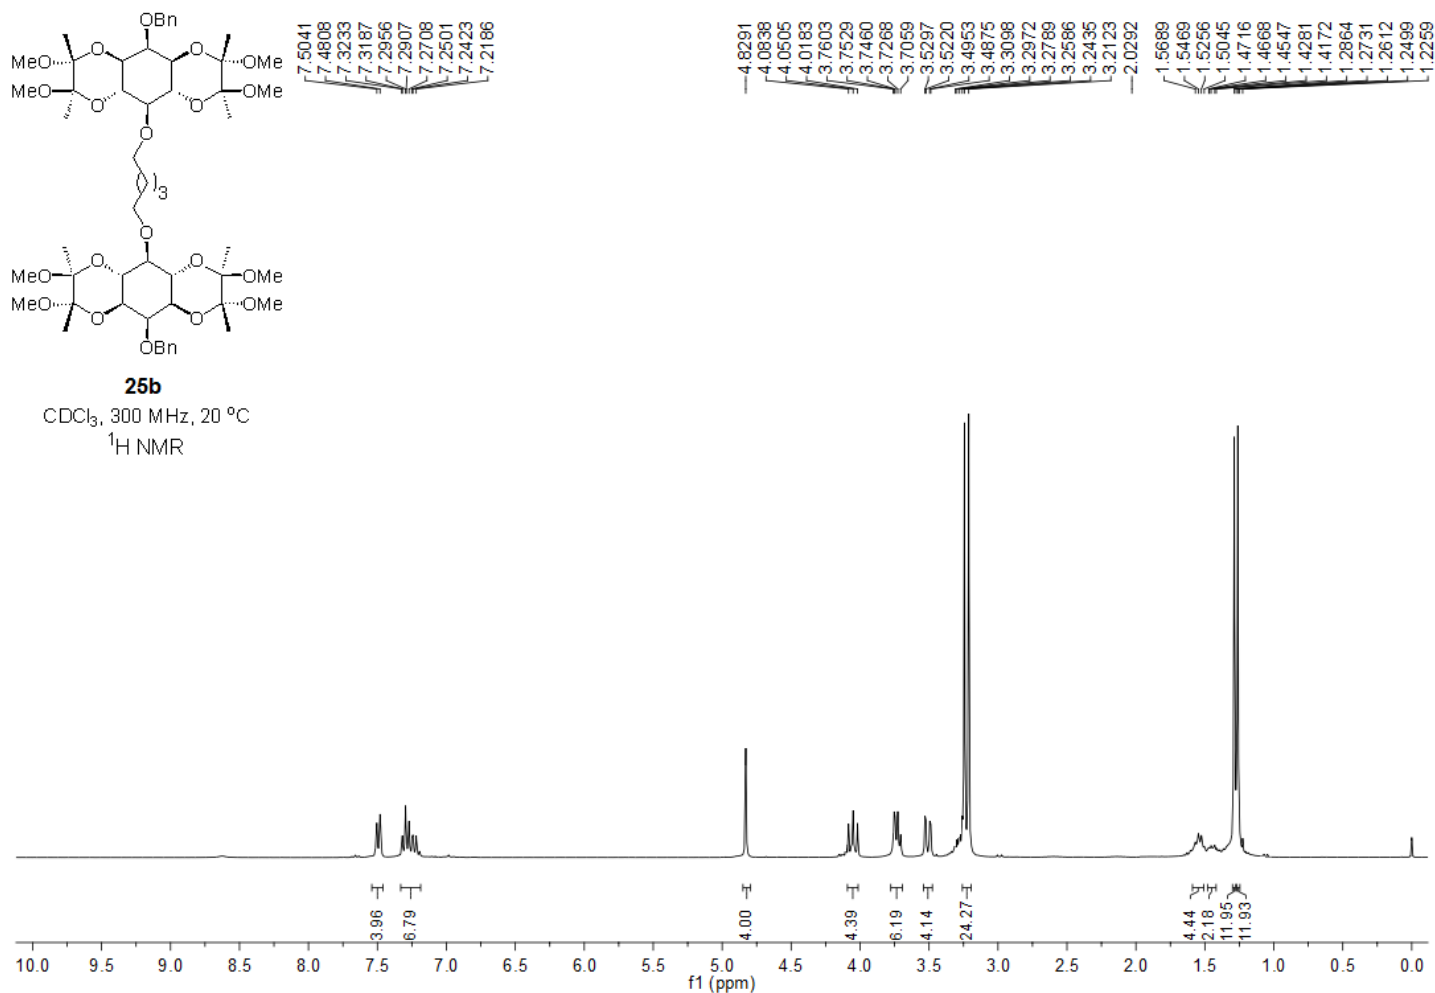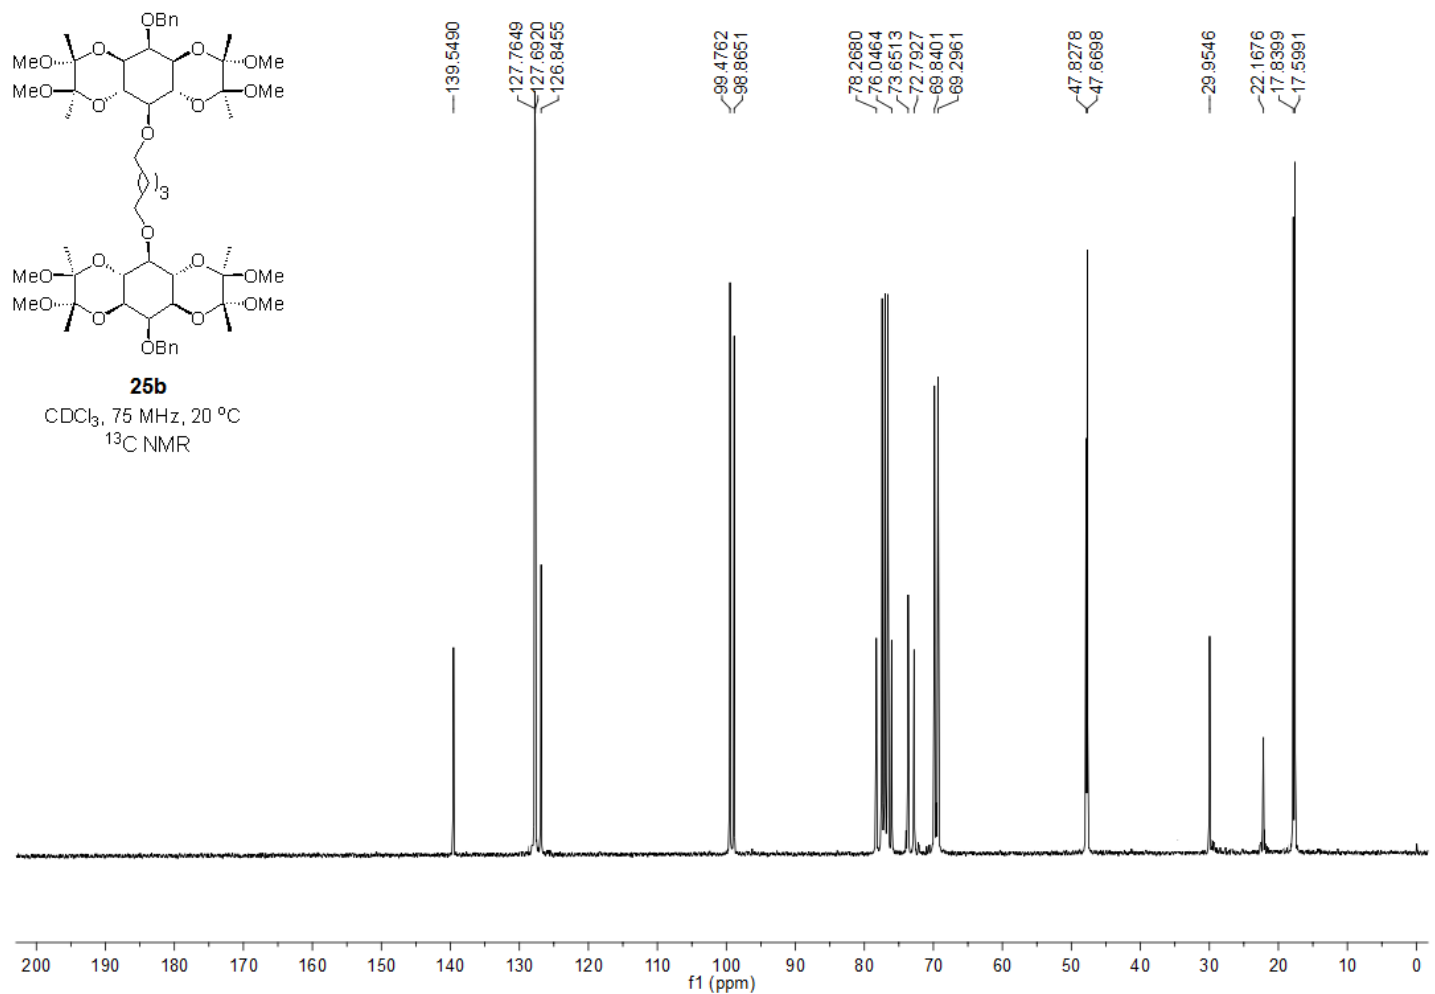

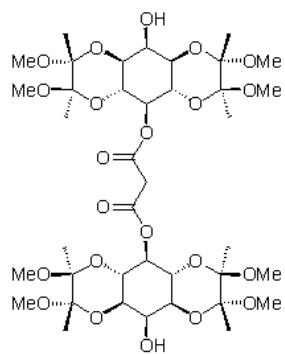

**28a**

CDCl<sub>3</sub>, 300 MHz, 20 °C  
<sup>1</sup>H NMR

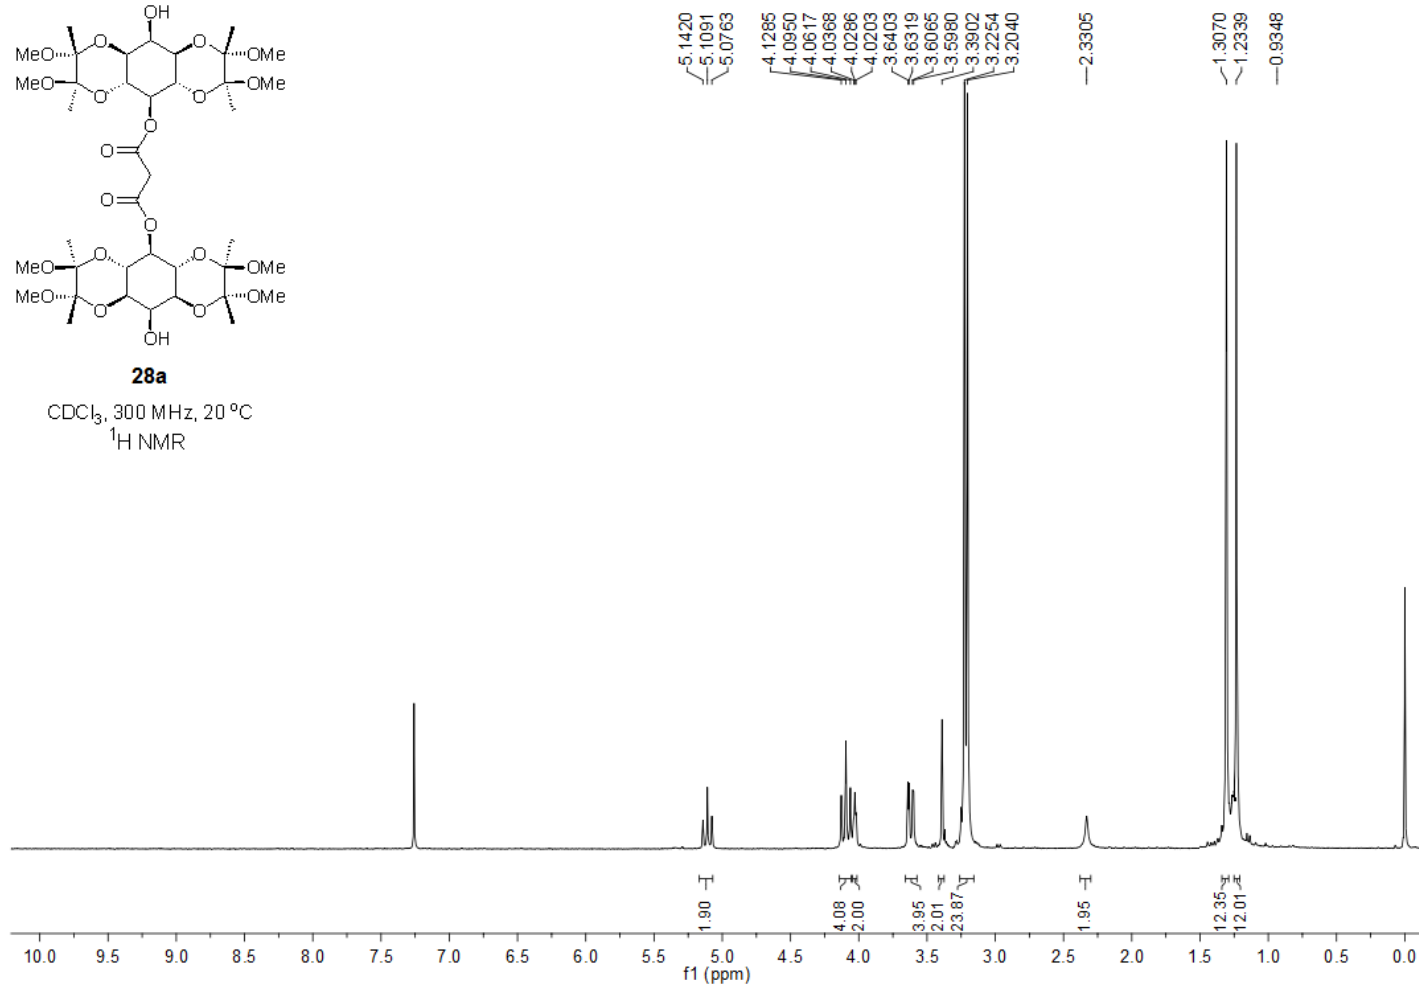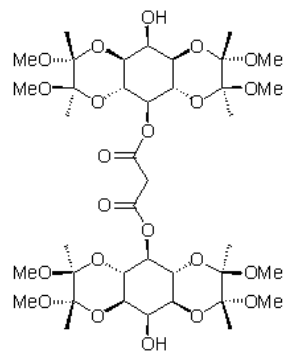

**28a**

CDCl<sub>3</sub>, 75 MHz, 20 °C  
<sup>13</sup>C NMR

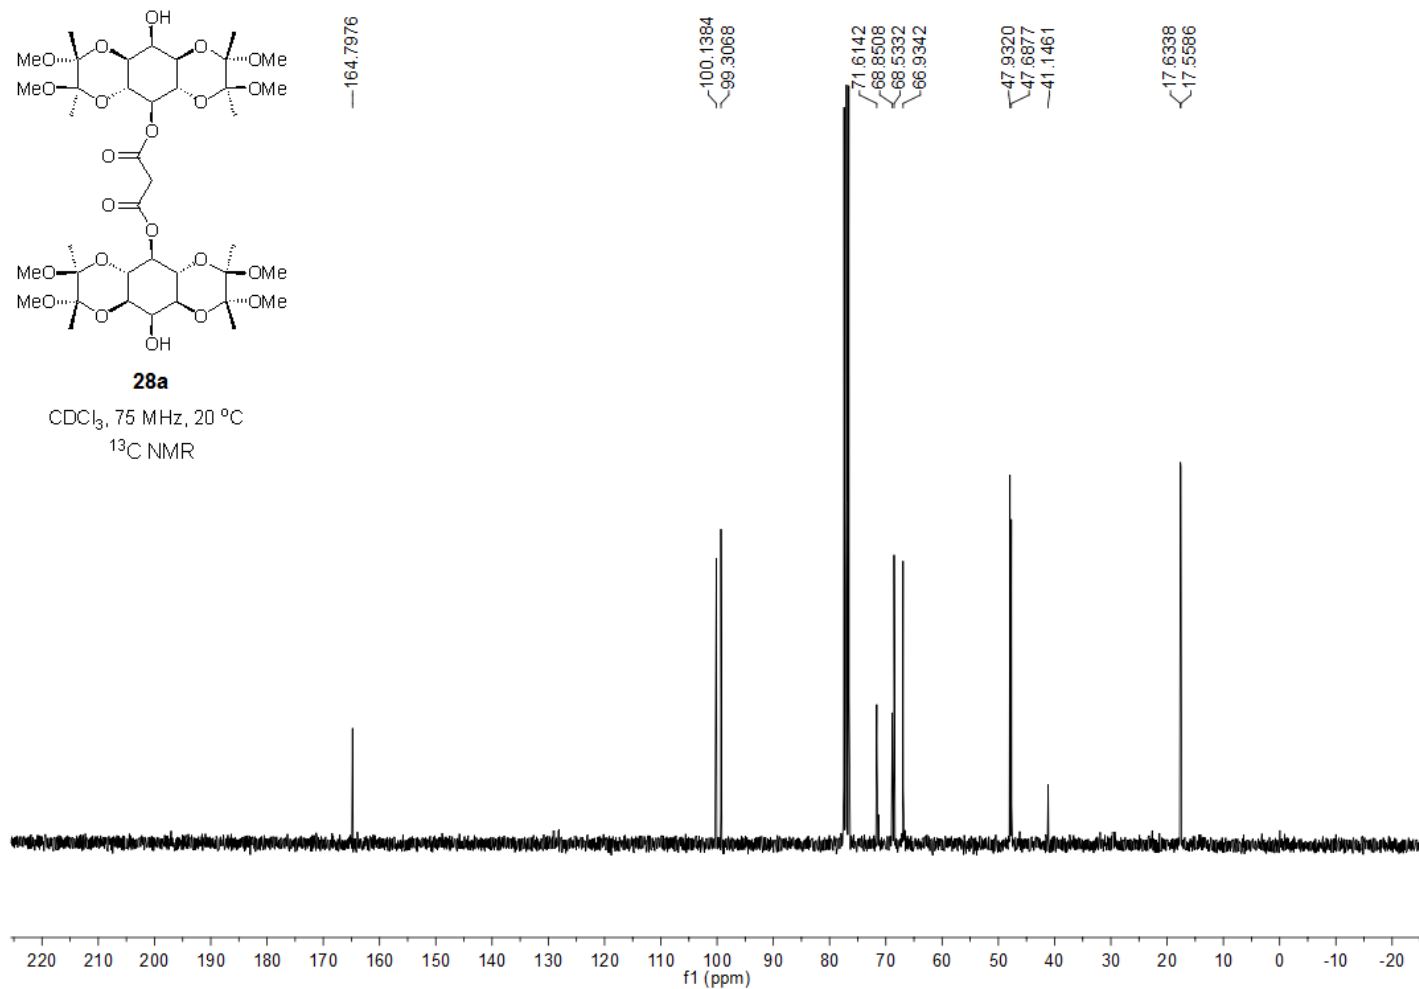

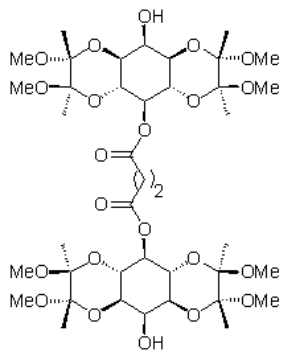

**28b**

CDCl<sub>3</sub>, 300 MHz, 20 °C  
<sup>1</sup>H NMR

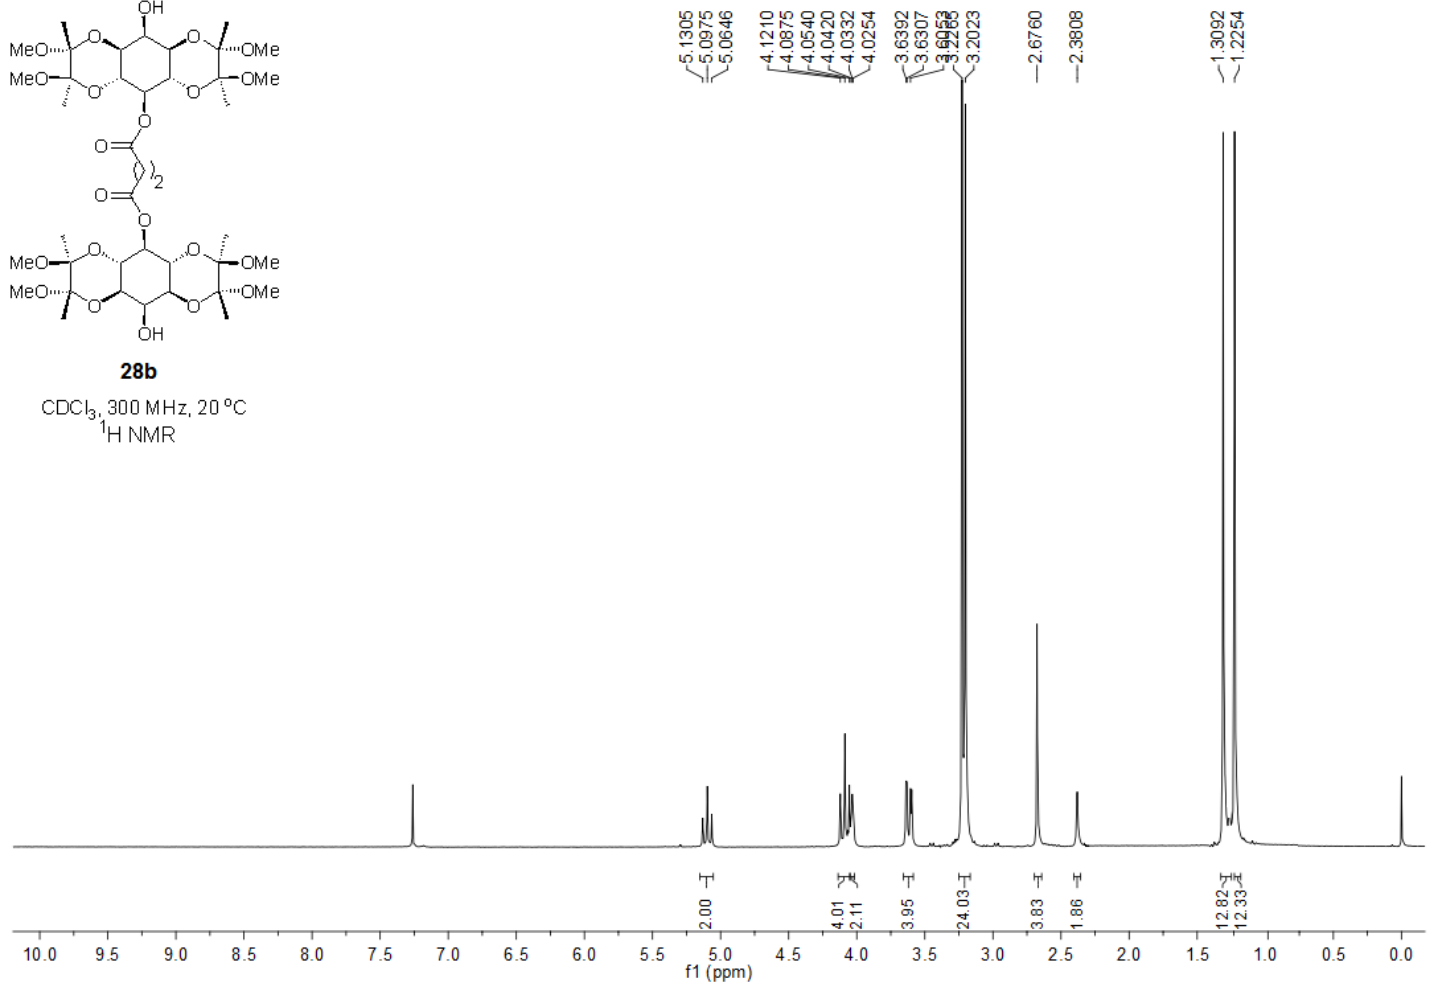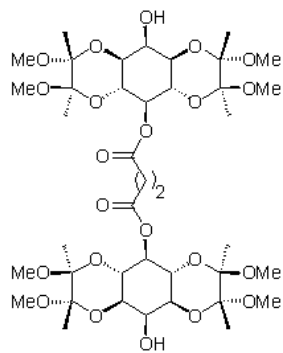

**28b**

CDCl<sub>3</sub>, 75 MHz, 20 °C  
<sup>13</sup>C NMR

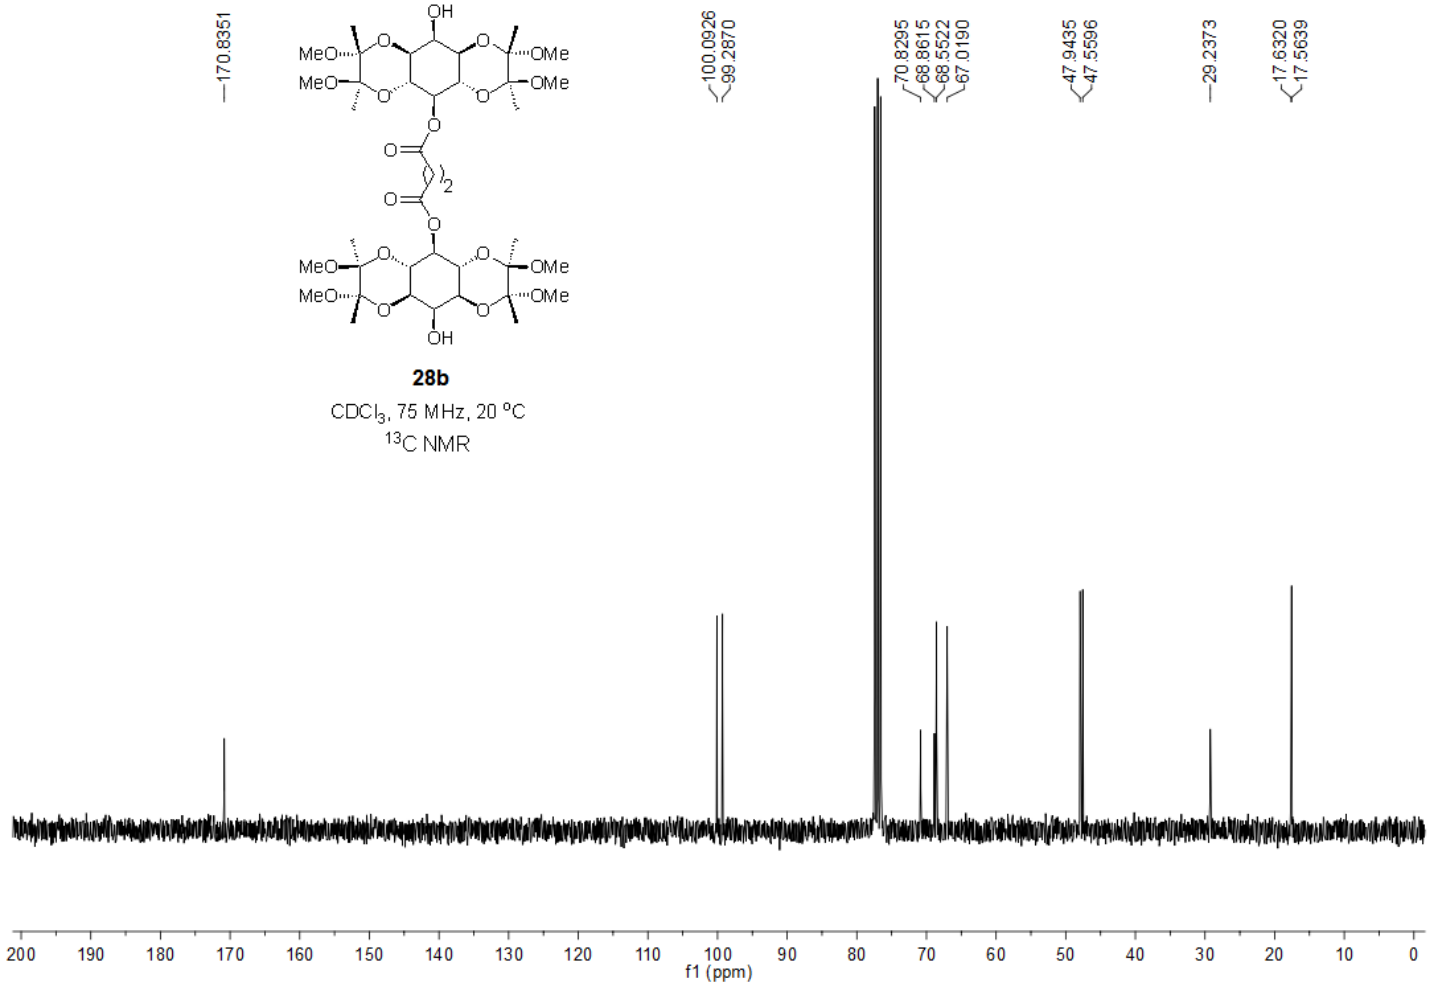

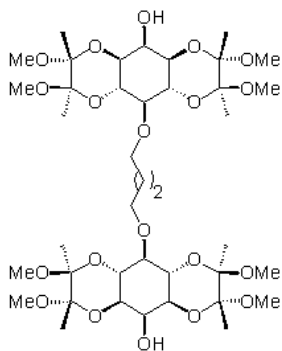

**28c**

CDCl<sub>3</sub>, 500 MHz, 20 °C  
<sup>1</sup>H NMR

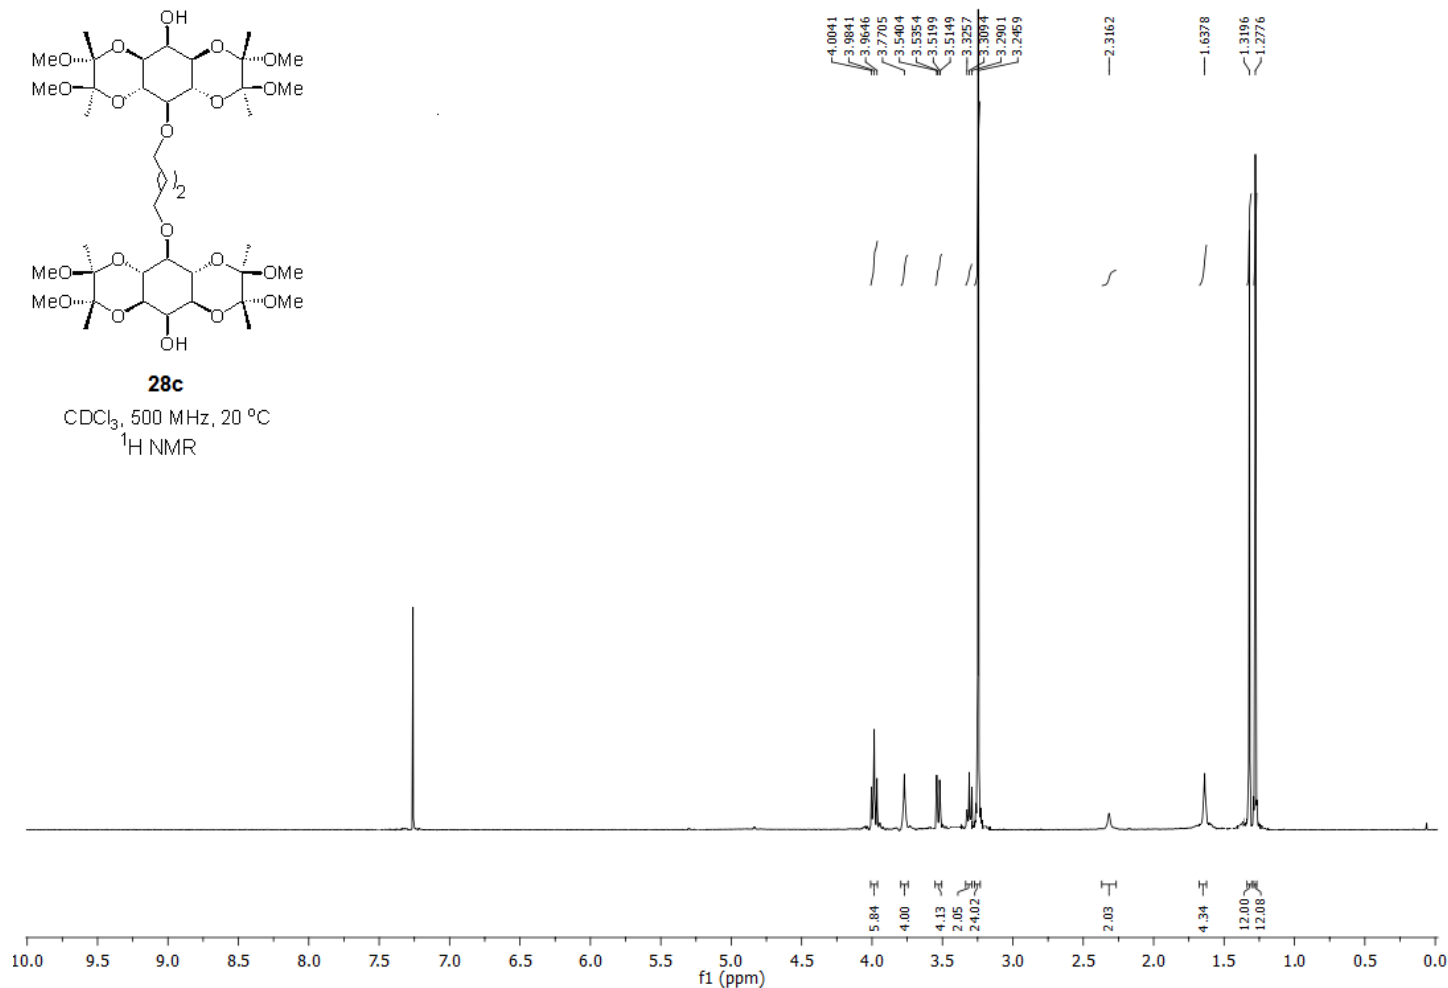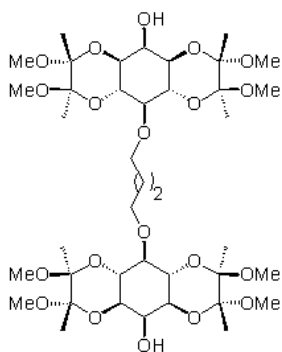

**28c**

CDCl<sub>3</sub>, 126 MHz, 20 °C  
<sup>13</sup>C NMR

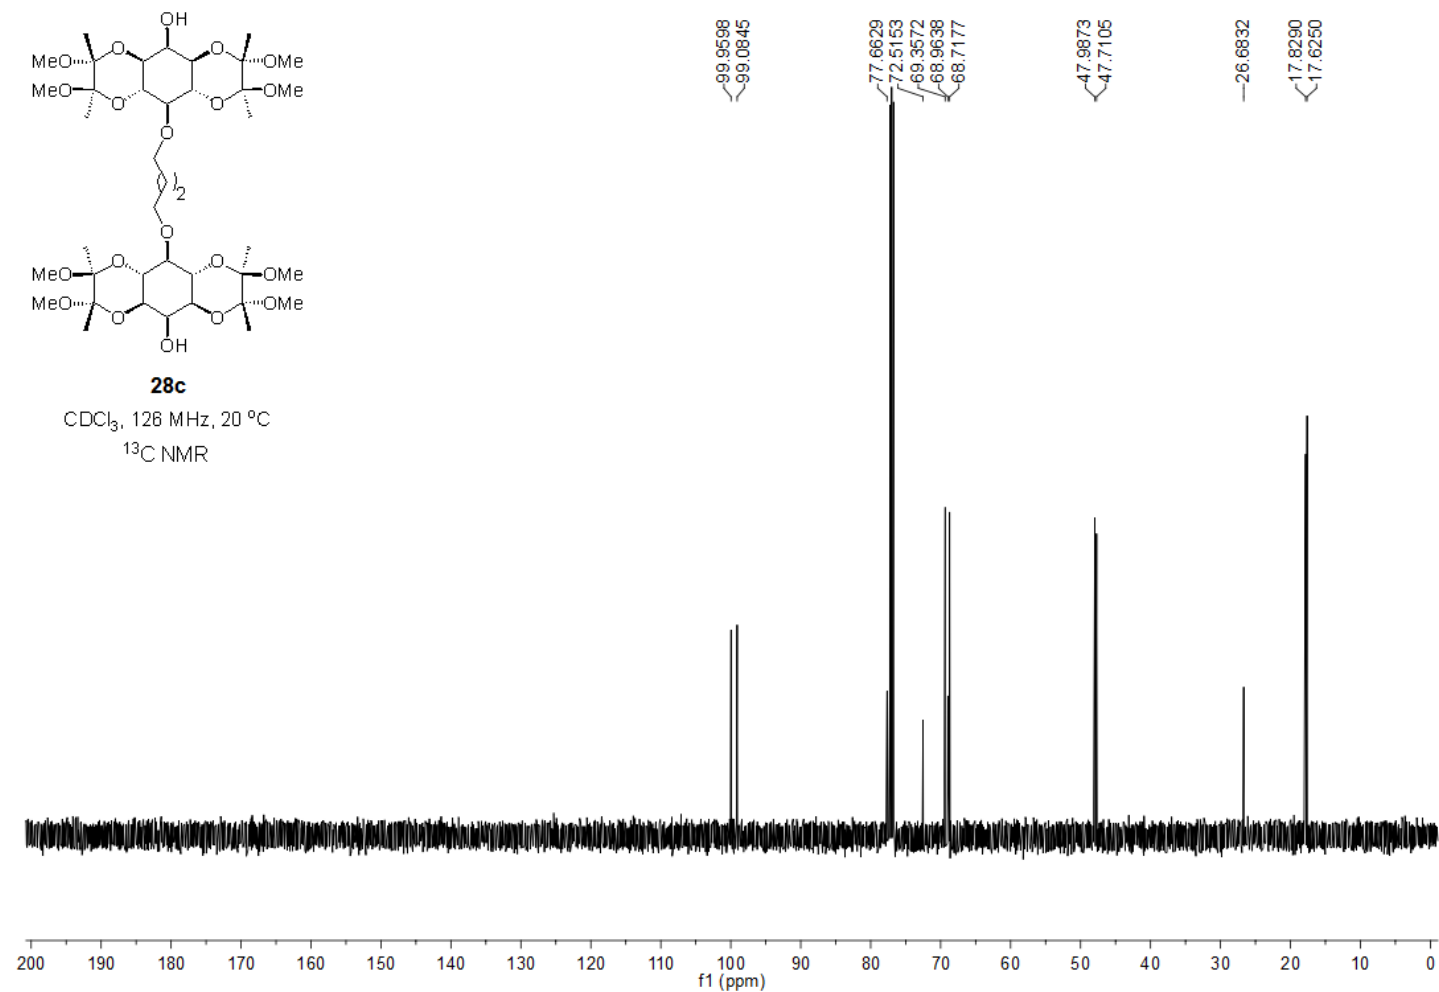



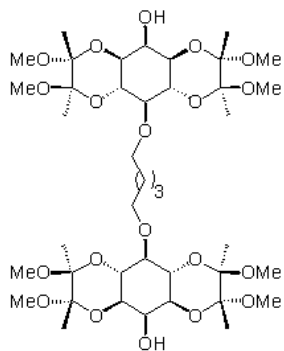

**28d**

CDCl<sub>3</sub>, 500 MHz, 20 °C  
<sup>1</sup>H NMR

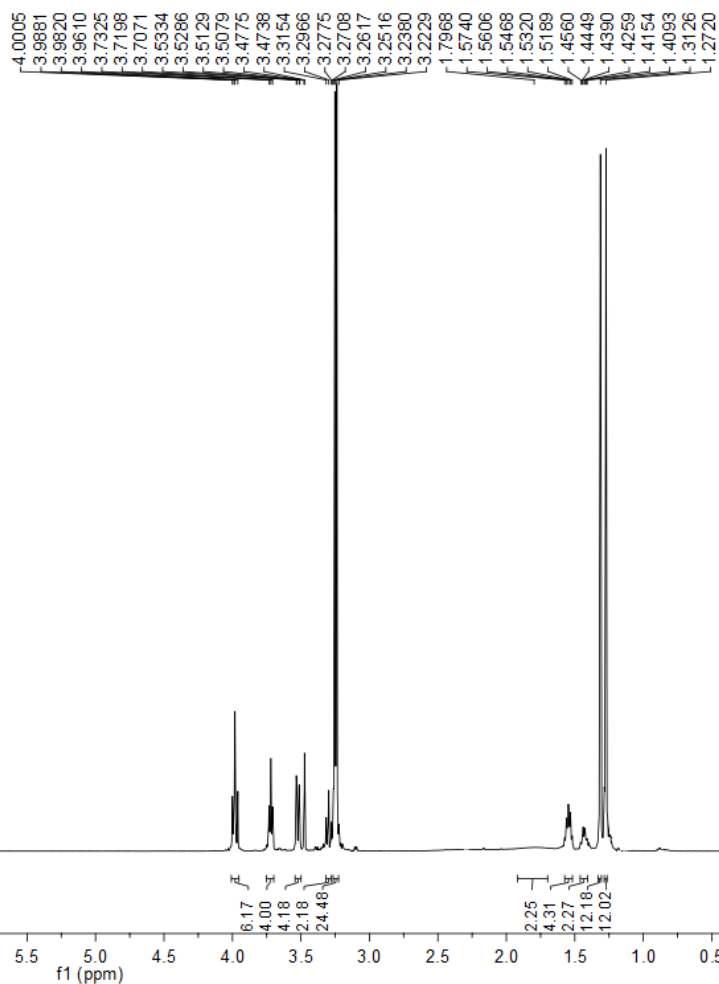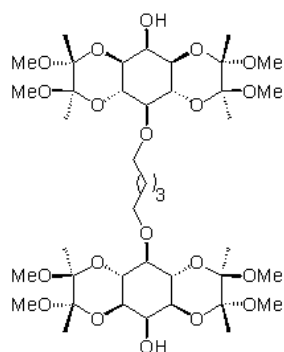

**28d**

CDCl<sub>3</sub>, 128 MHz, 20 °C  
<sup>13</sup>C NMR

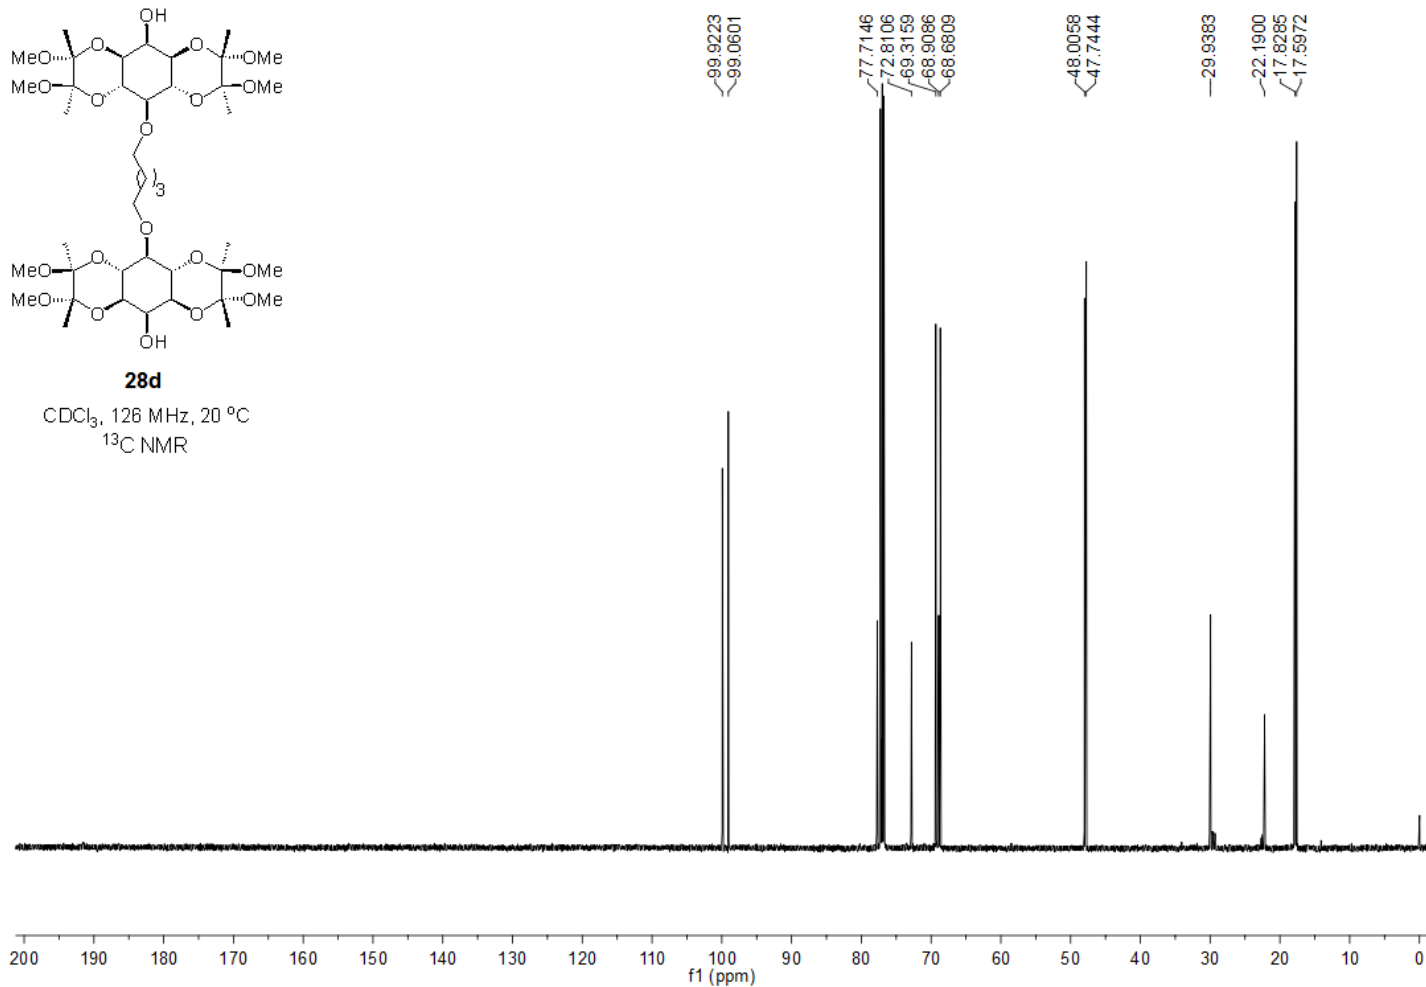

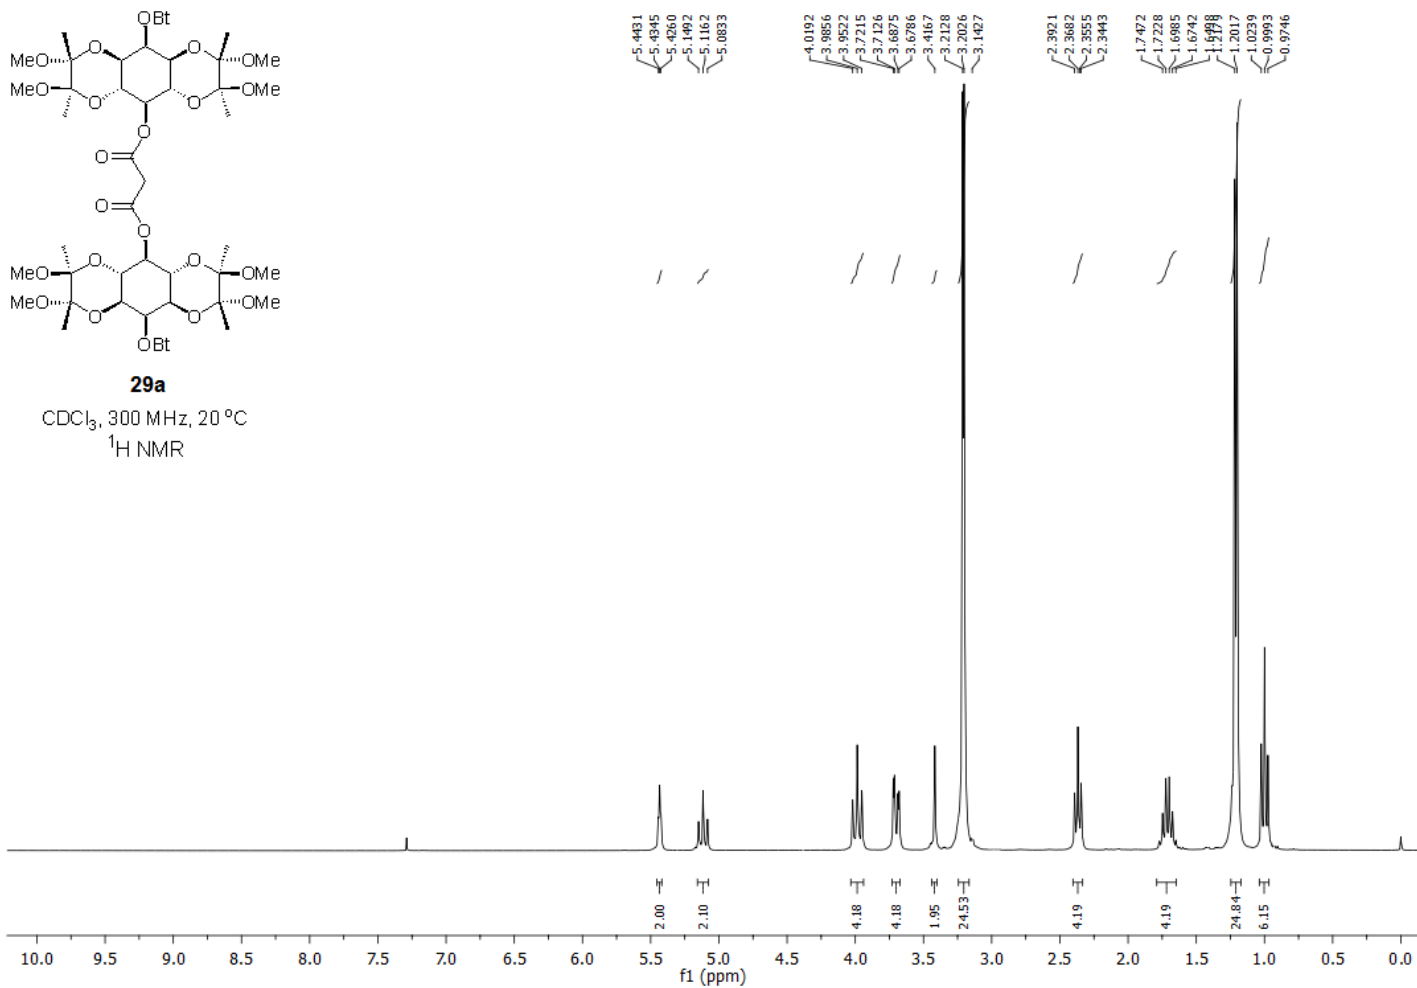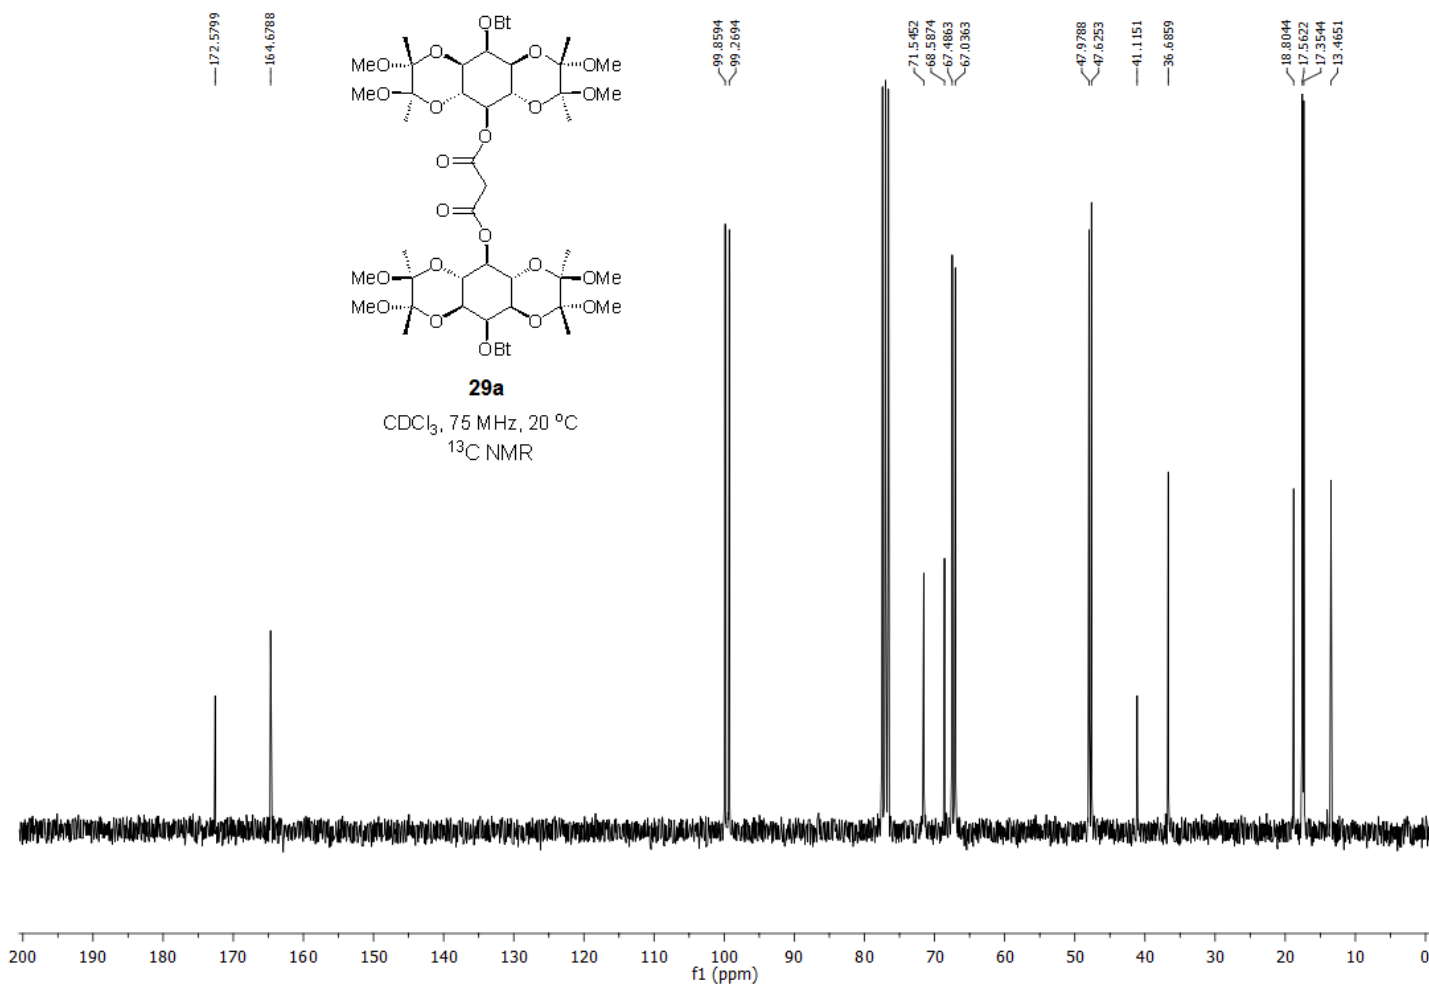

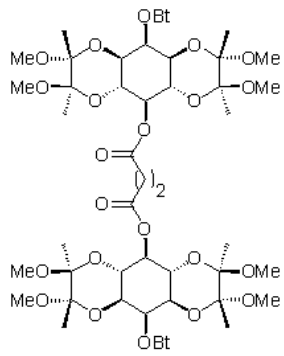

**29b**

CDCl<sub>3</sub>, 300 MHz, 20 °C  
<sup>1</sup>H NMR

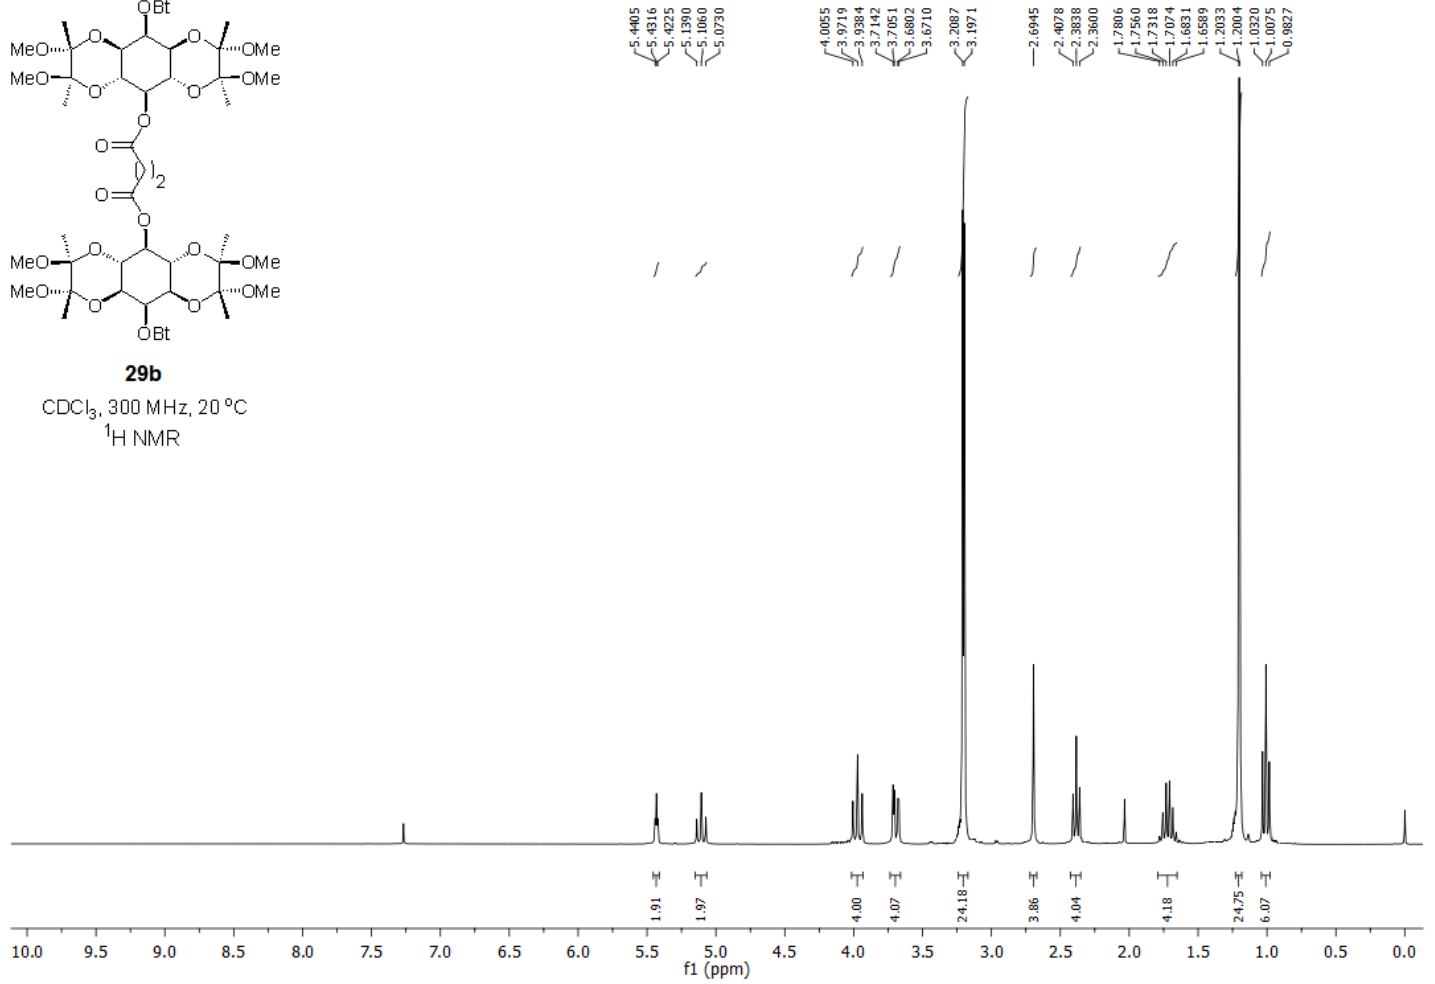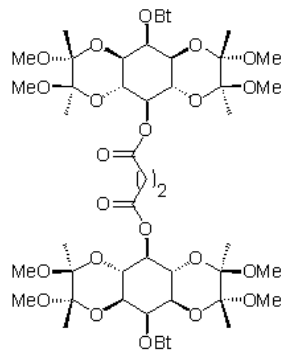

**29b**

CDCl<sub>3</sub>, 75 MHz, 20 °C  
<sup>13</sup>C NMR

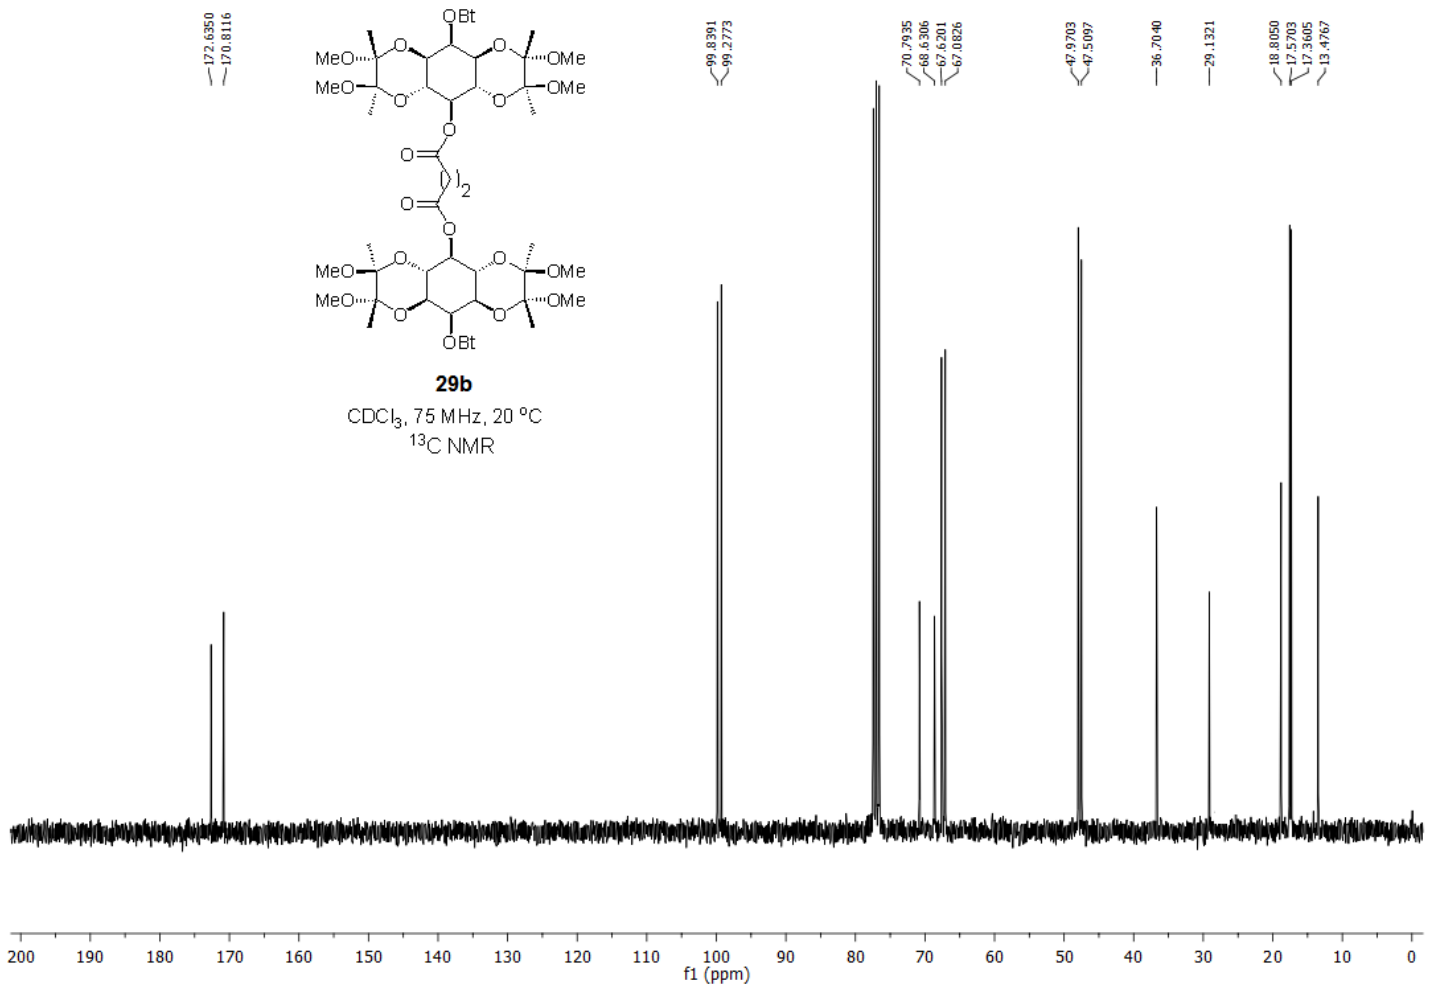

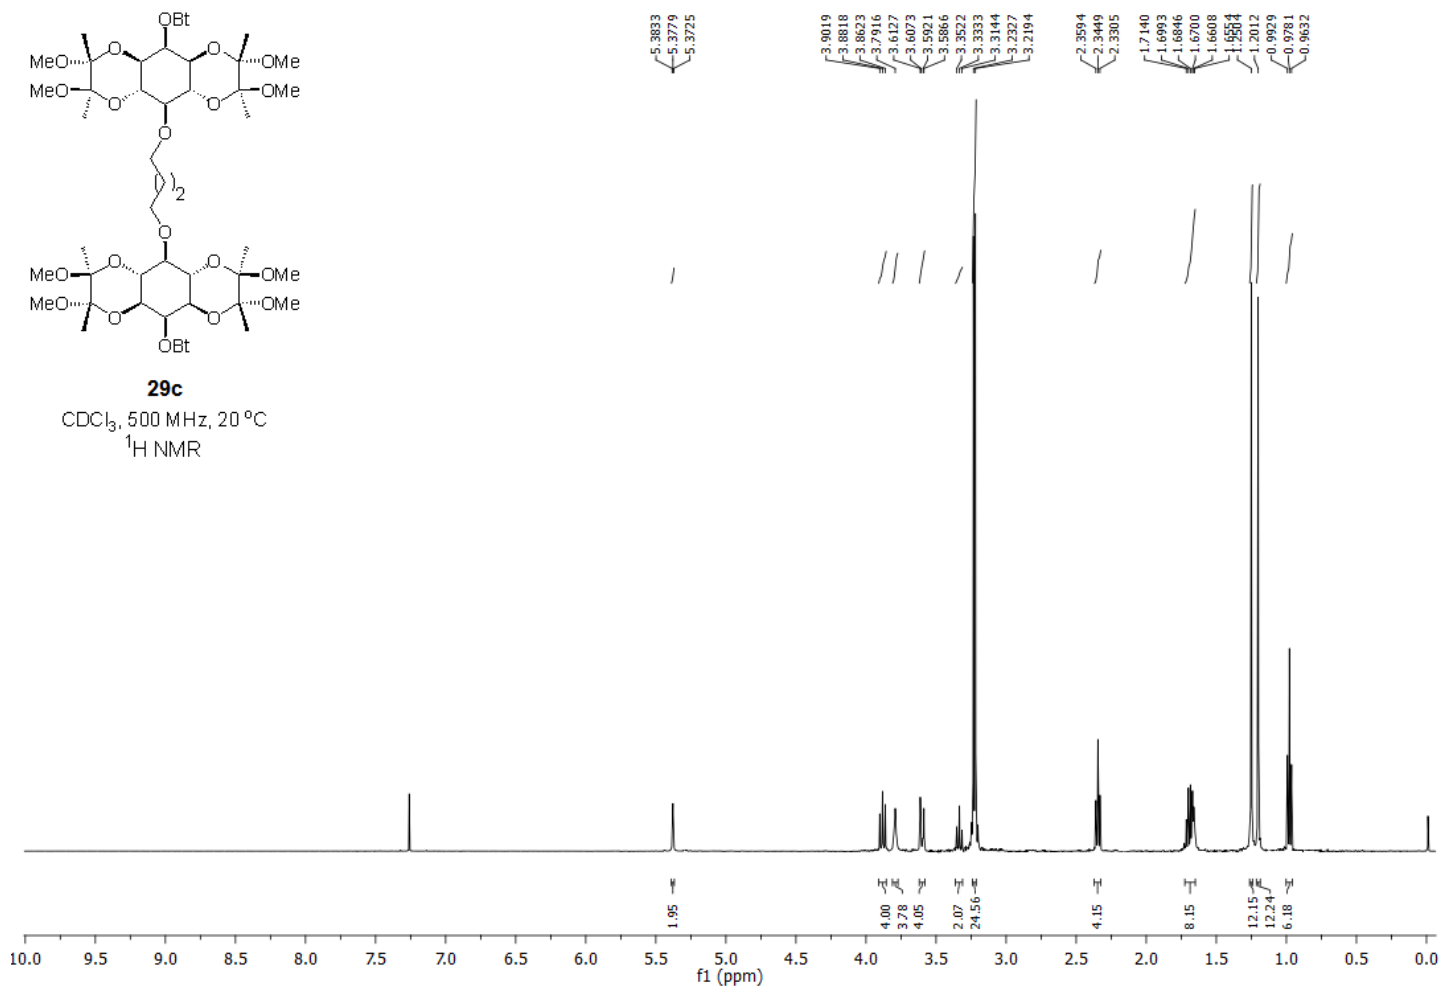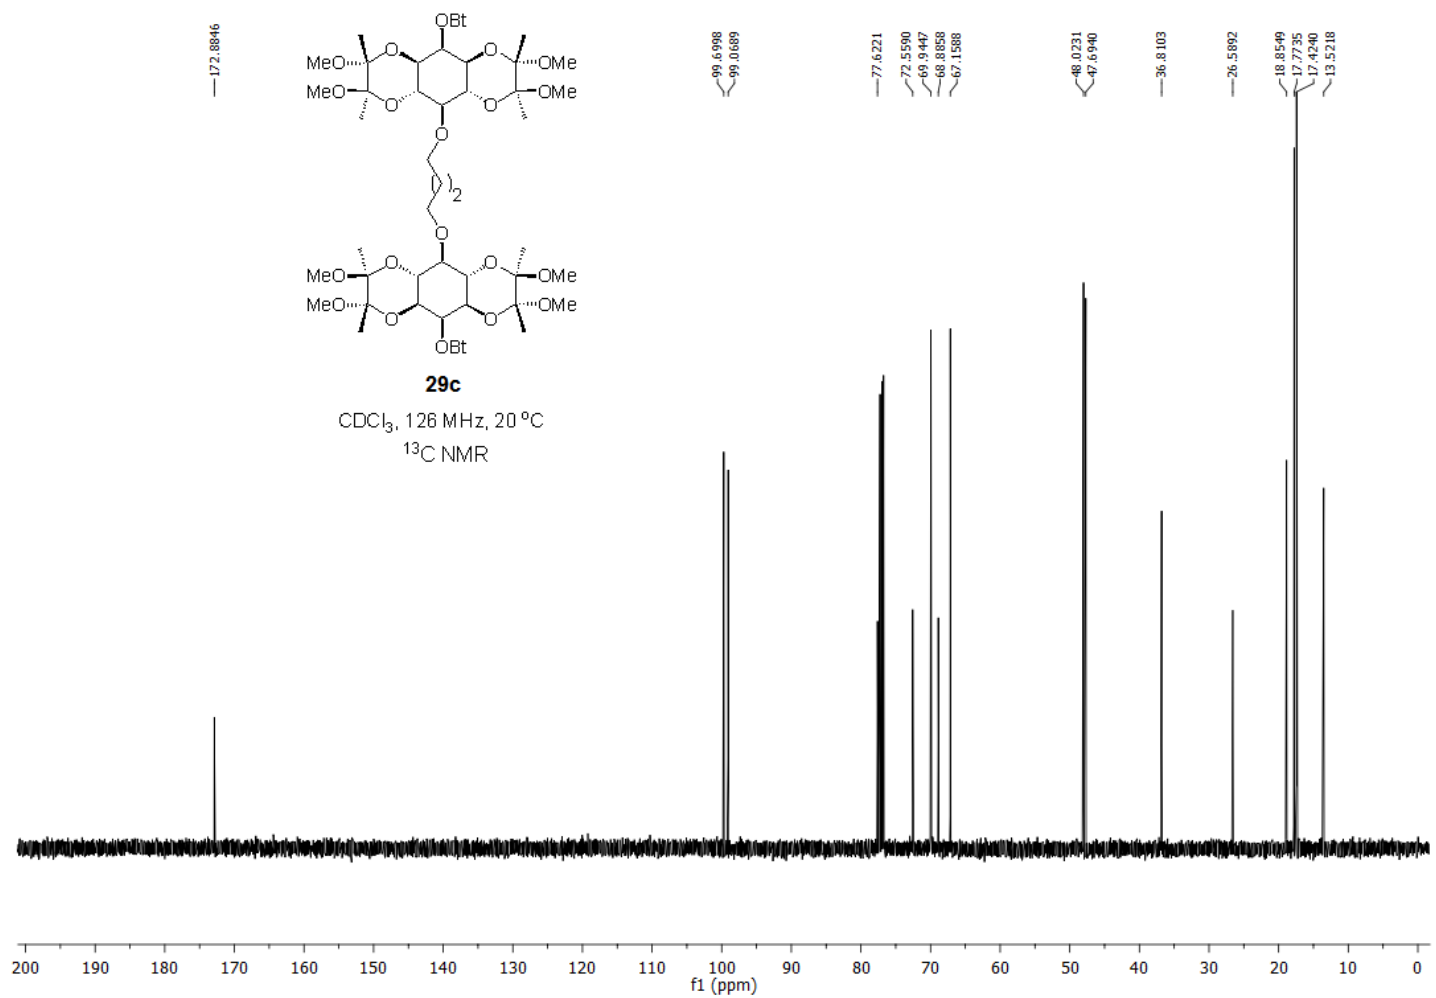

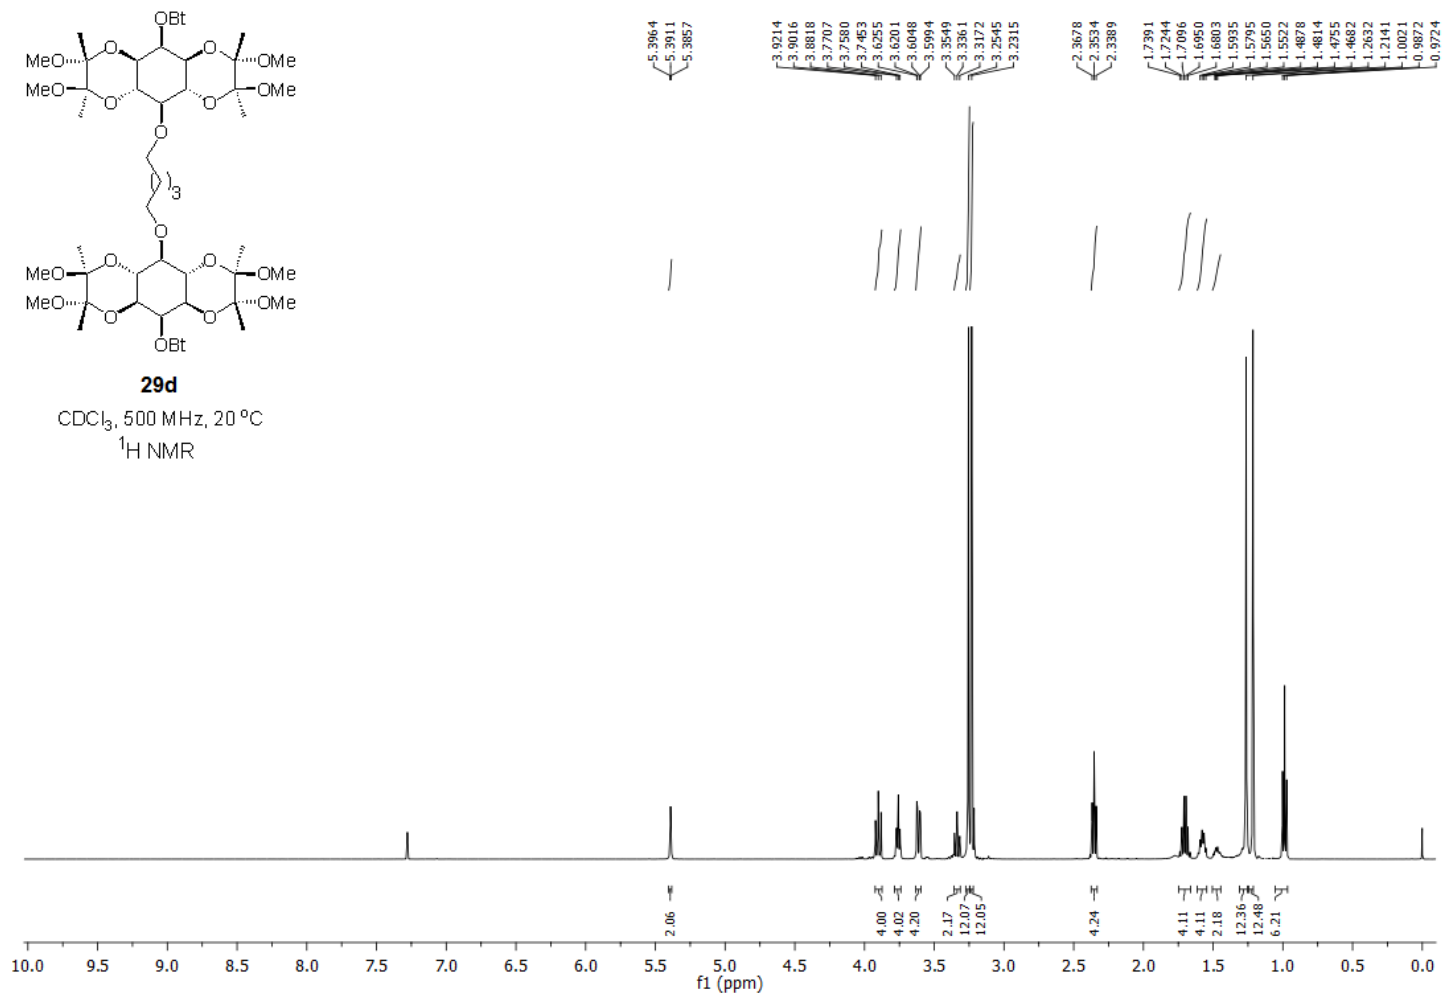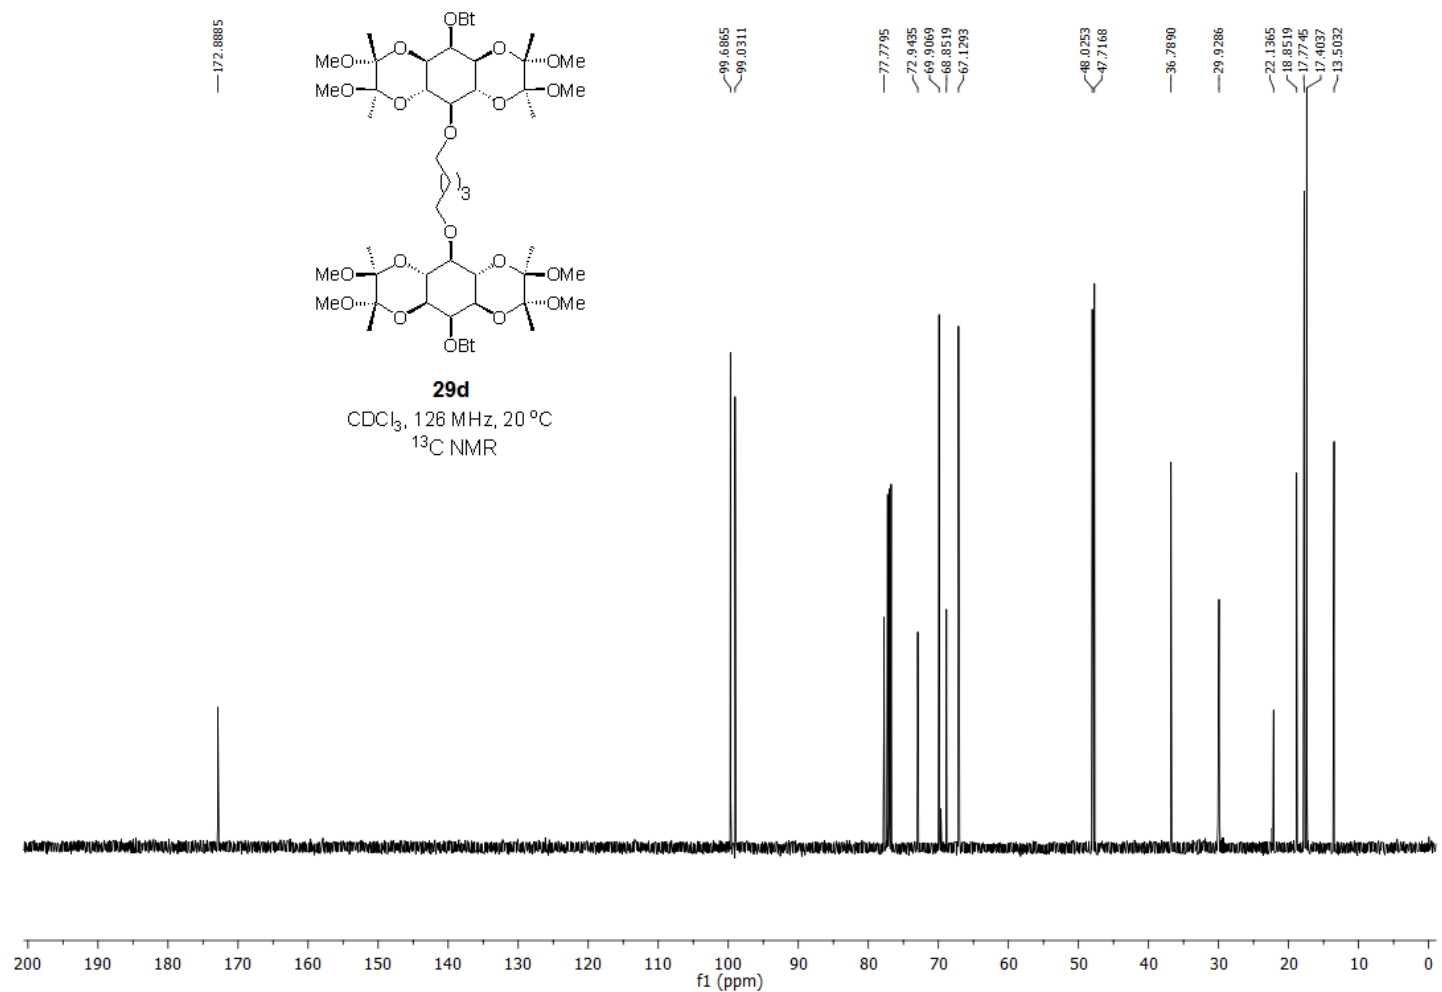

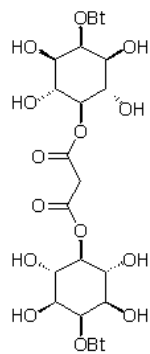

**30a**

CD<sub>3</sub>OD, 500 MHz, 20 °C  
<sup>1</sup>H NMR

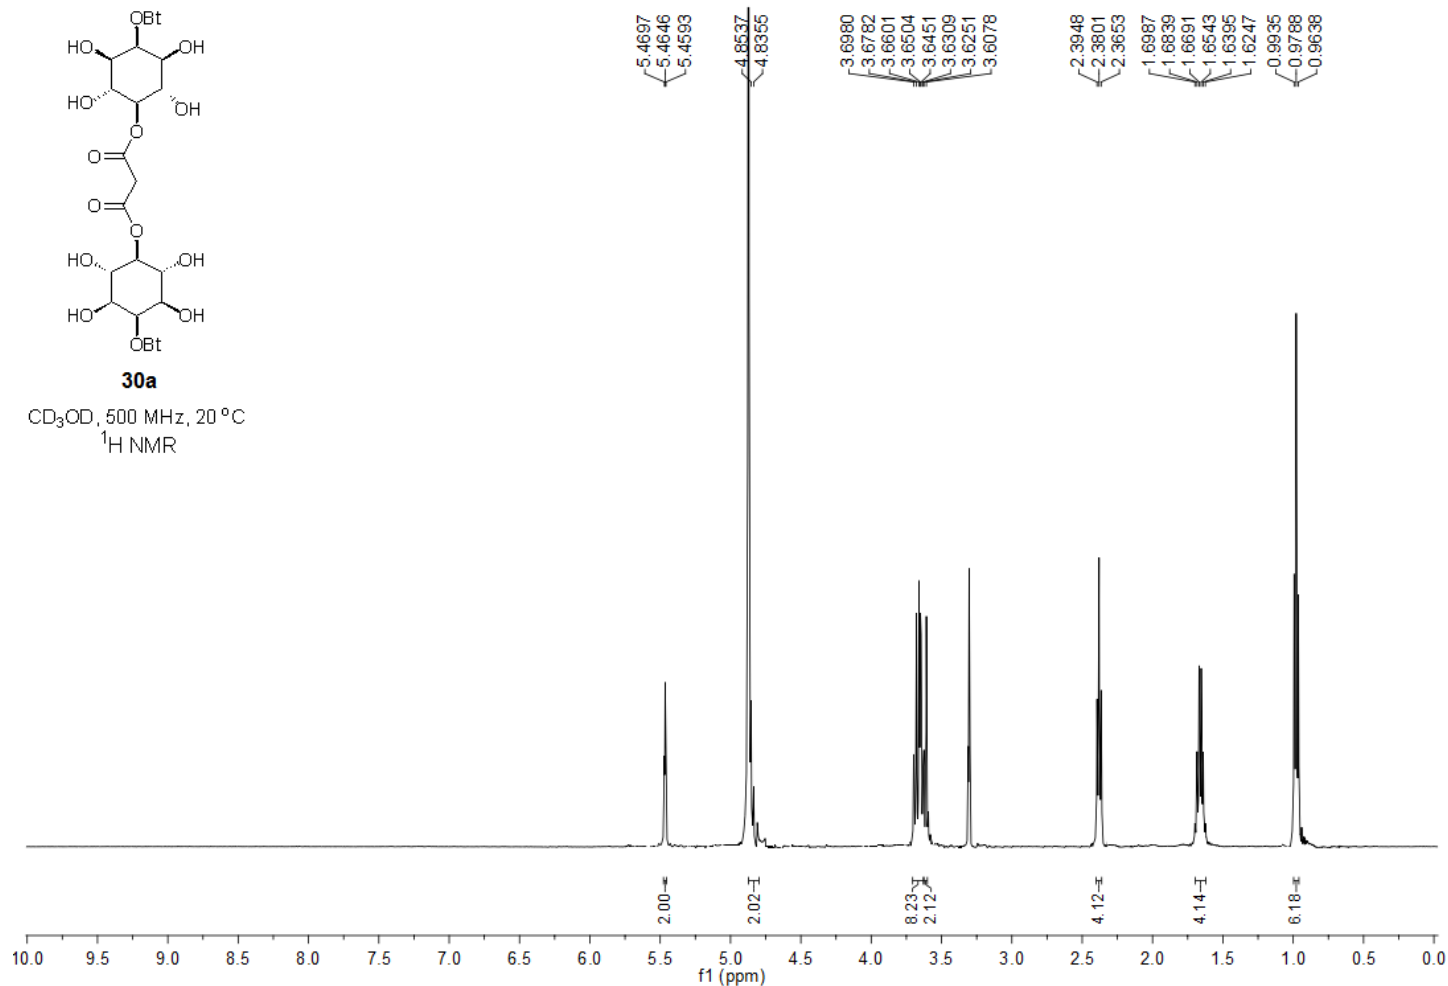

—174.7995  
 —168.0295

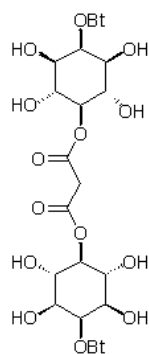

**30a**

CD<sub>3</sub>OD, 128 MHz, 20 °C  
<sup>13</sup>C NMR

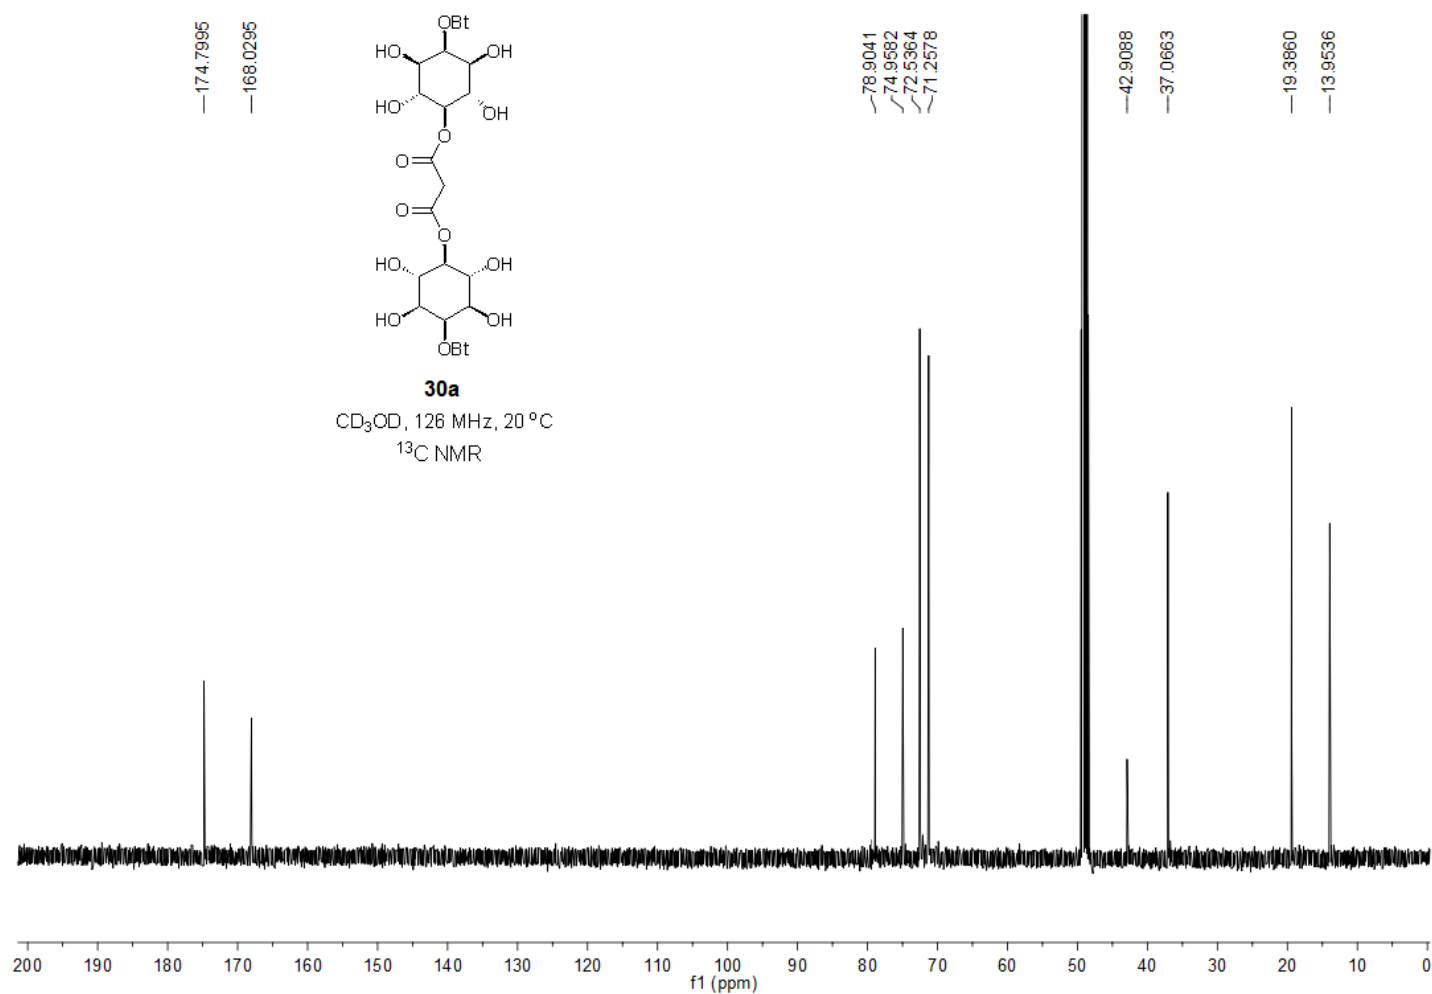

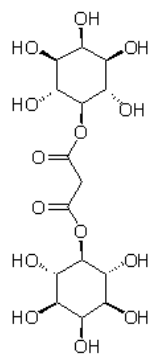

**30b**

D<sub>2</sub>O, 500 MHz, 20 °C  
<sup>1</sup>H NMR

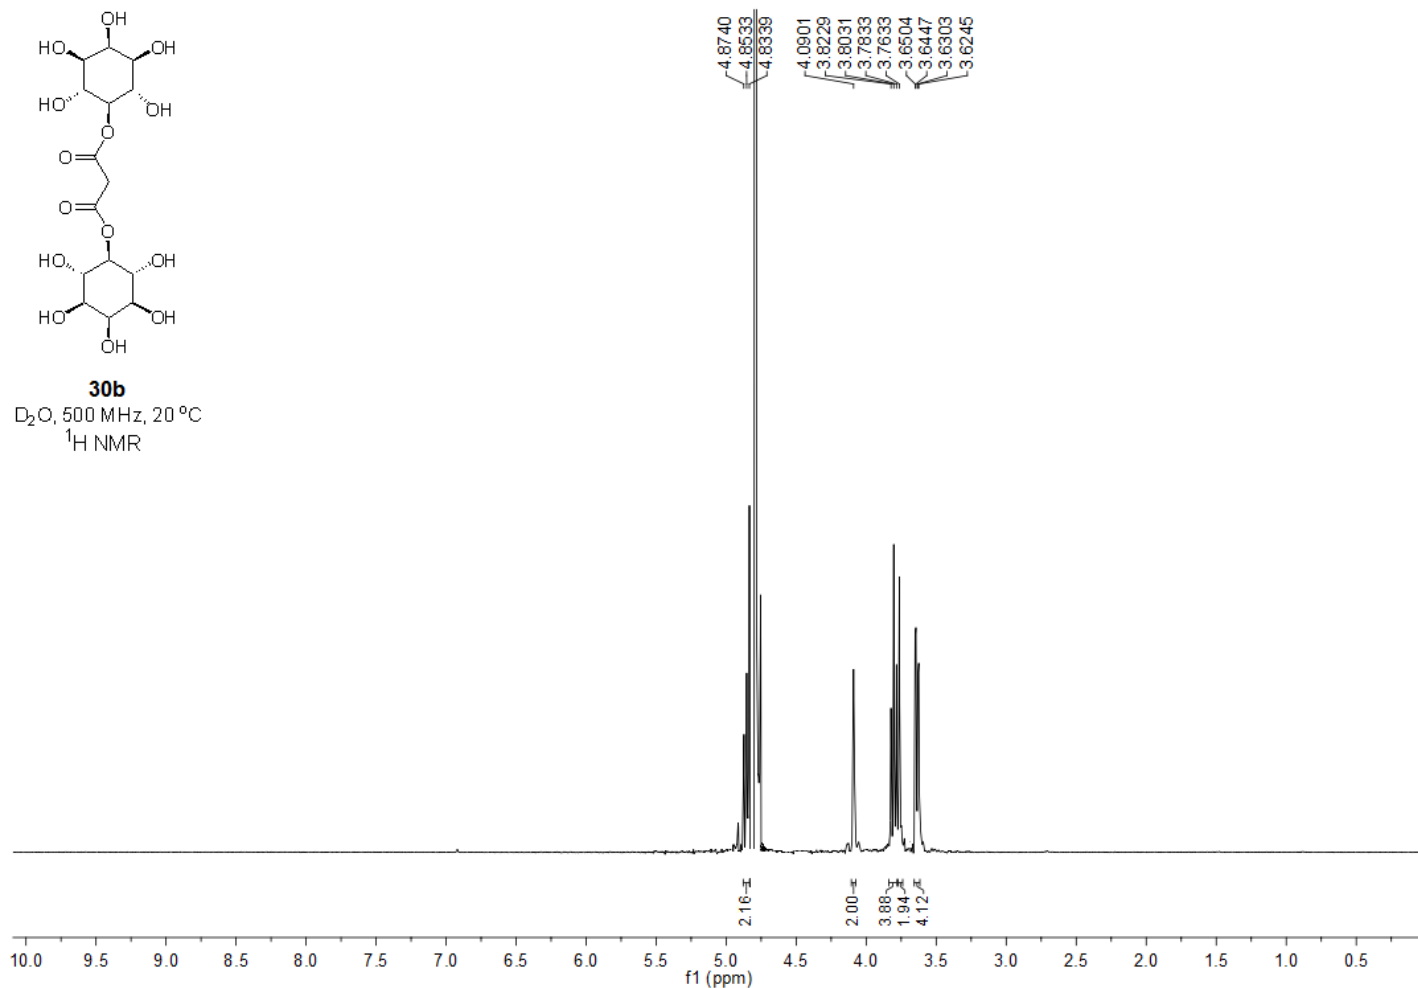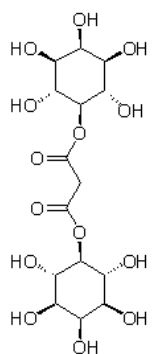

**30b**

D<sub>2</sub>O, 126 MHz, 20 °C  
<sup>13</sup>C NMR

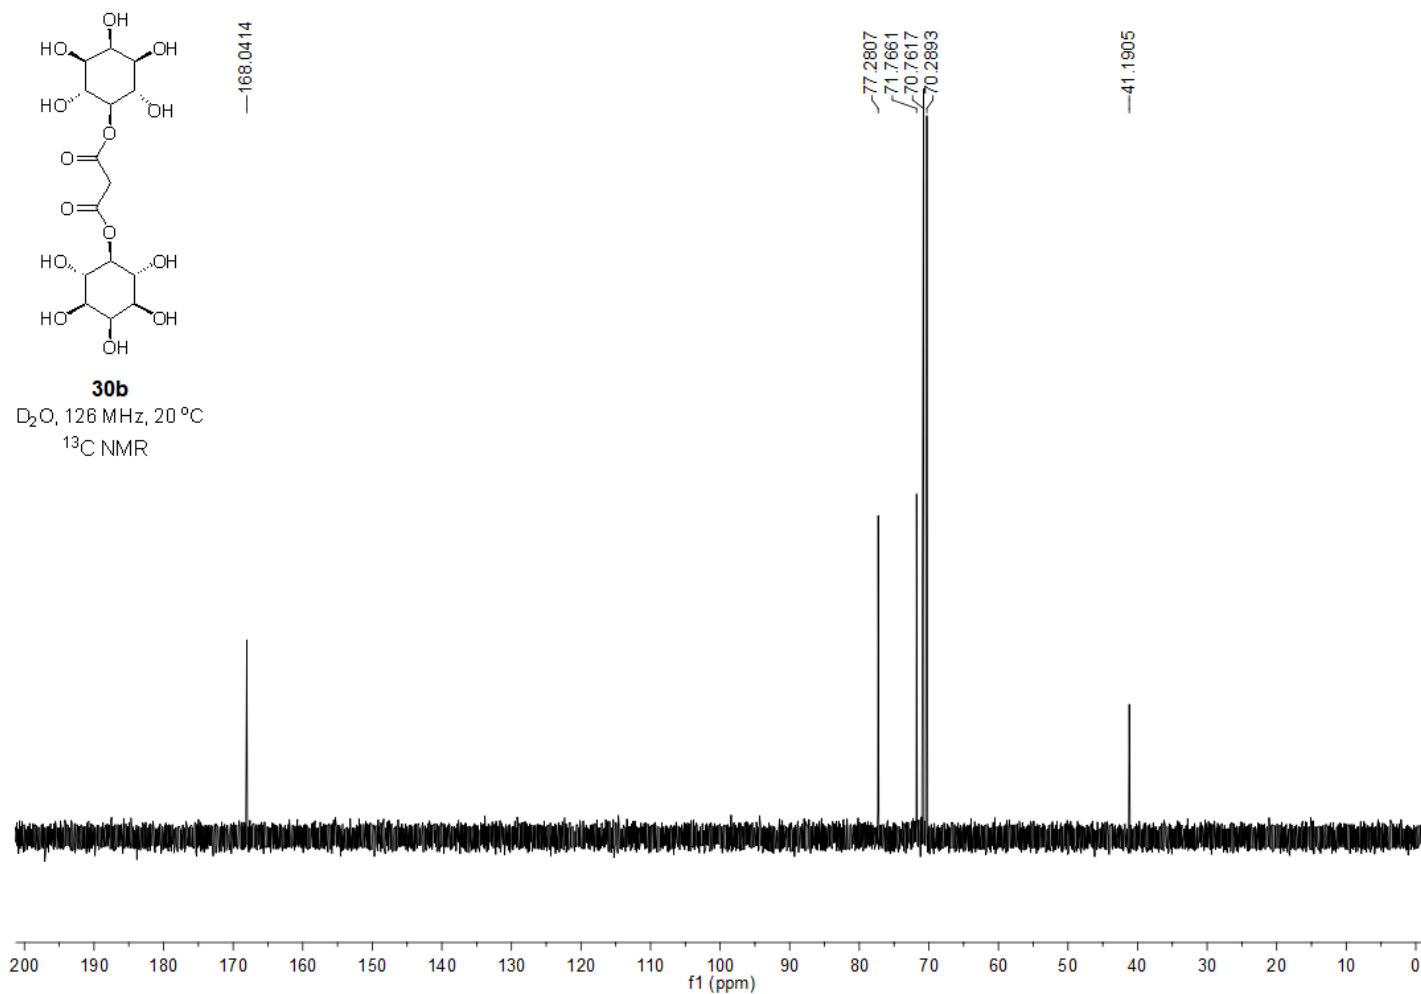

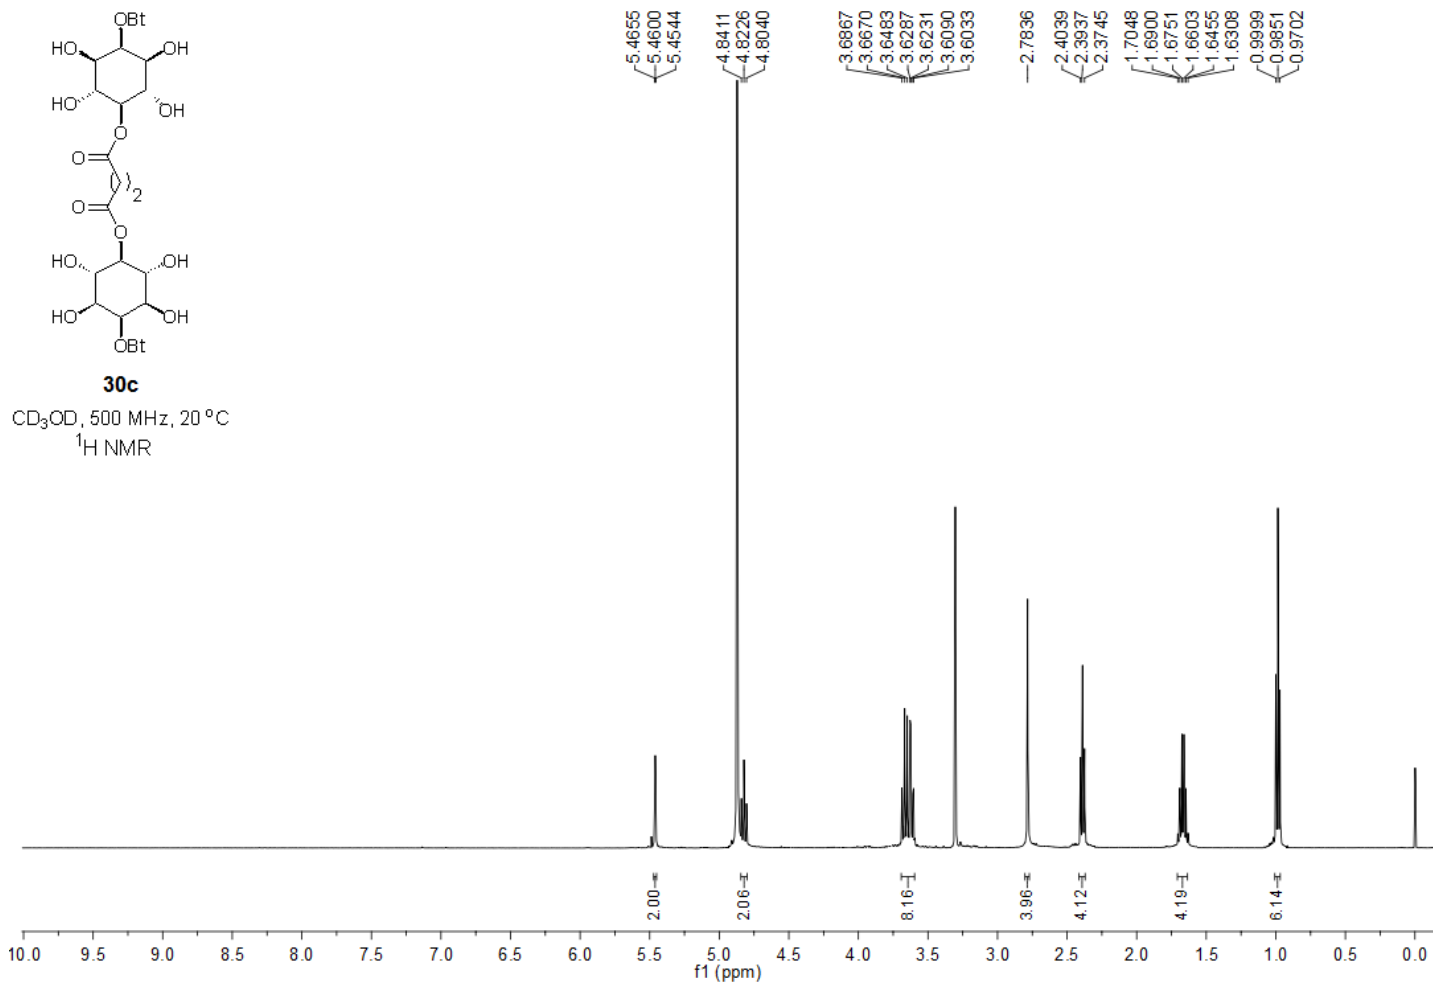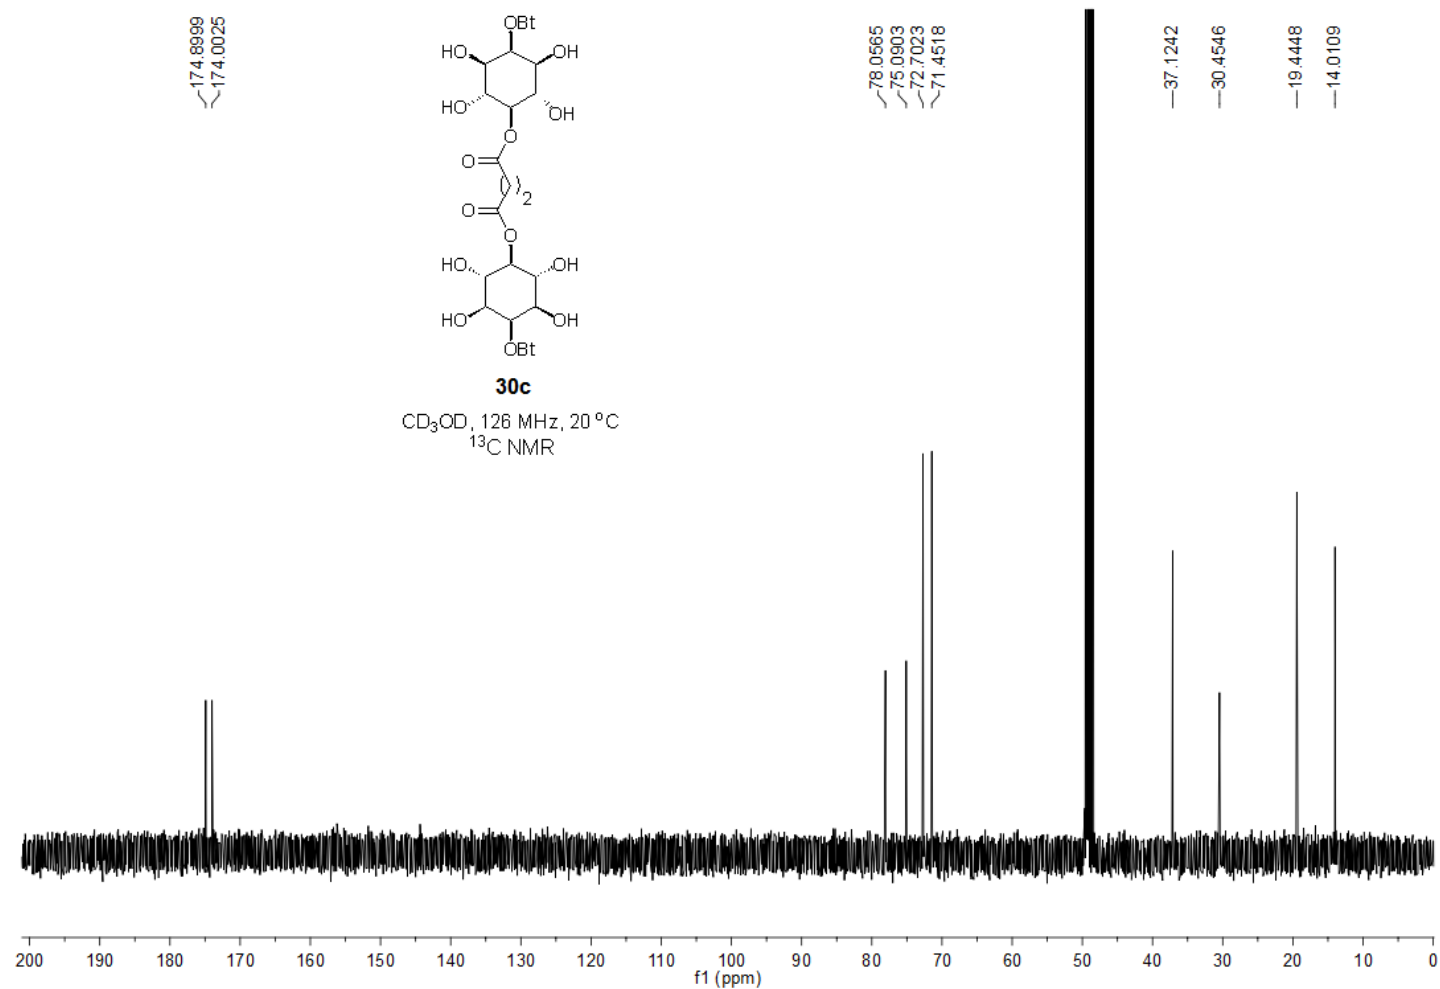



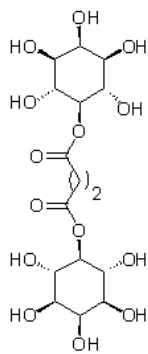

**30d**

D<sub>2</sub>O, 500 MHz, 20 °C  
<sup>1</sup>H NMR

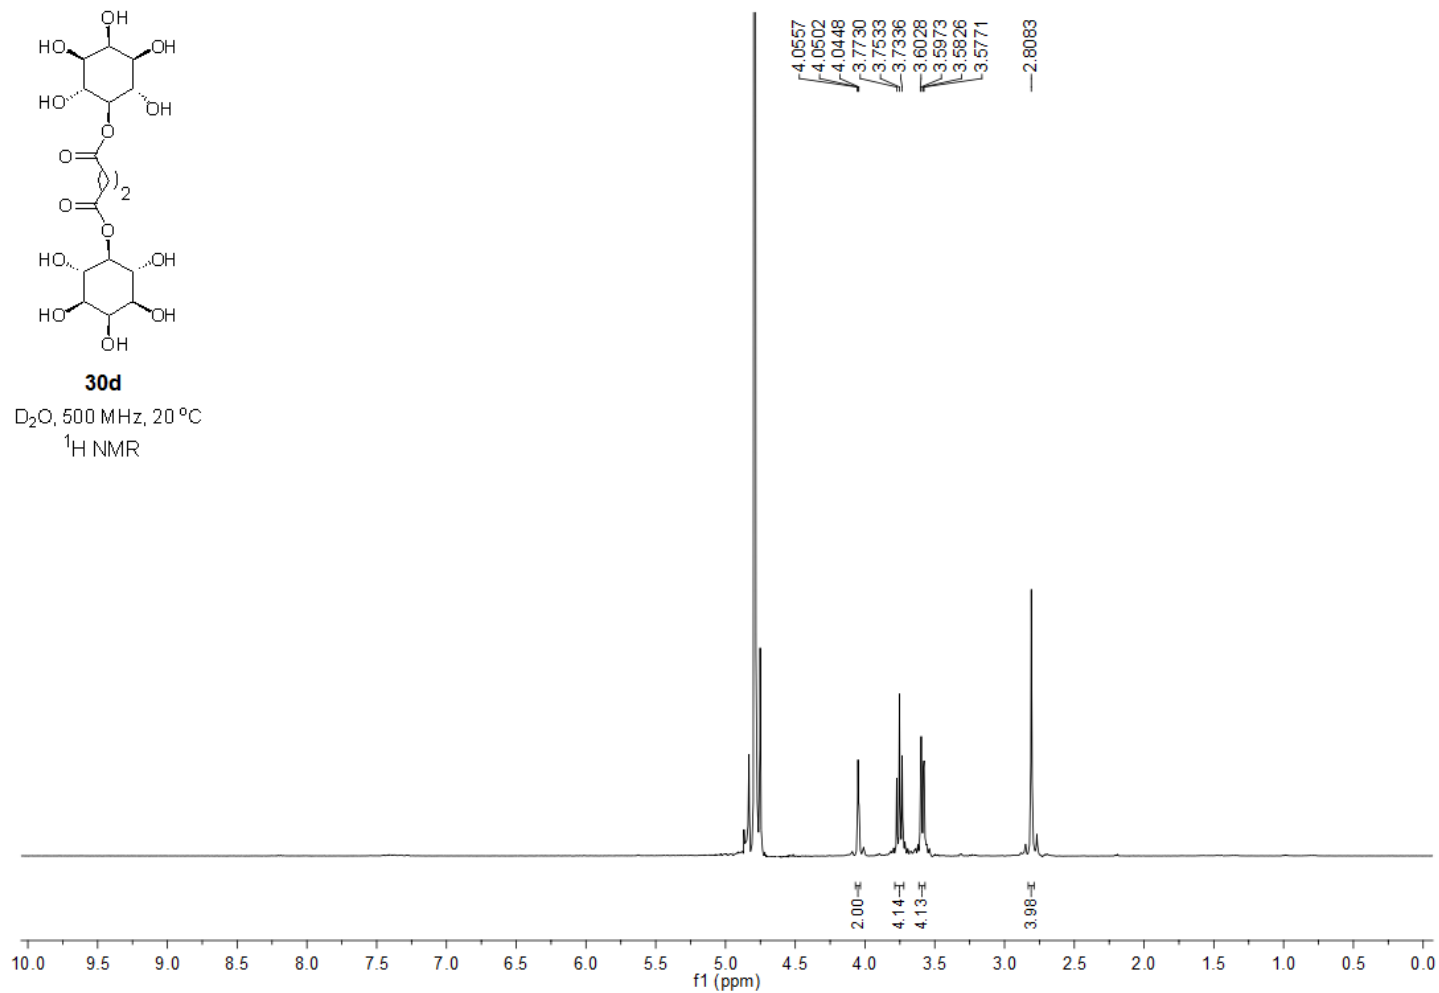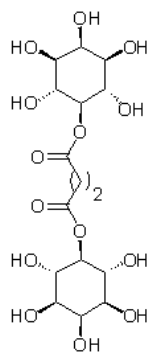

**30d**

D<sub>2</sub>O, 126 MHz, 20 °C  
<sup>13</sup>C NMR

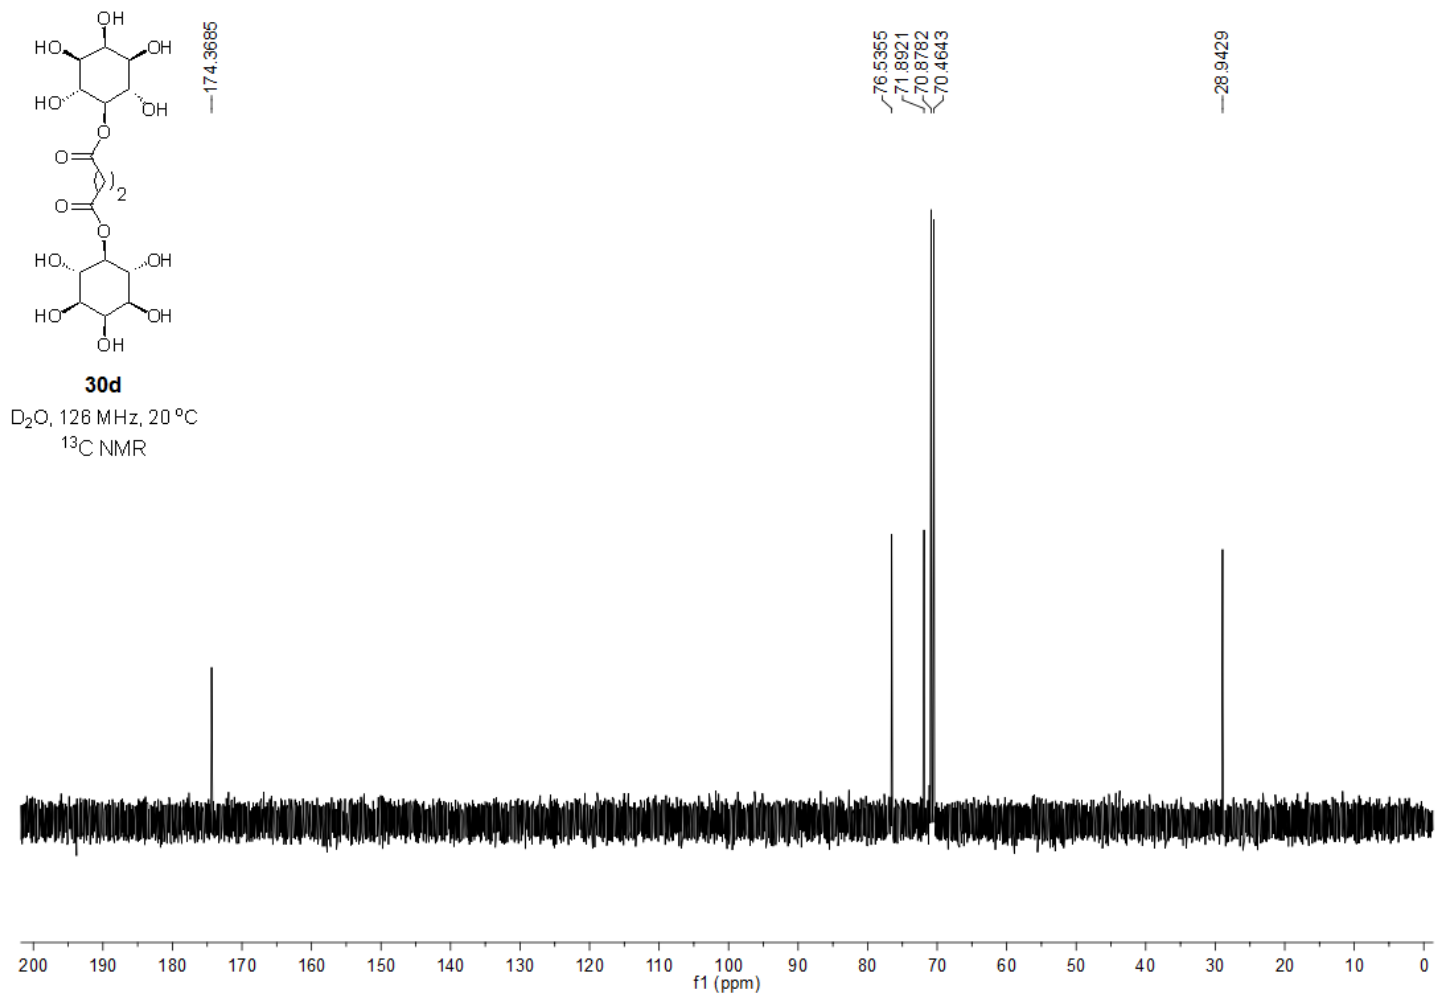

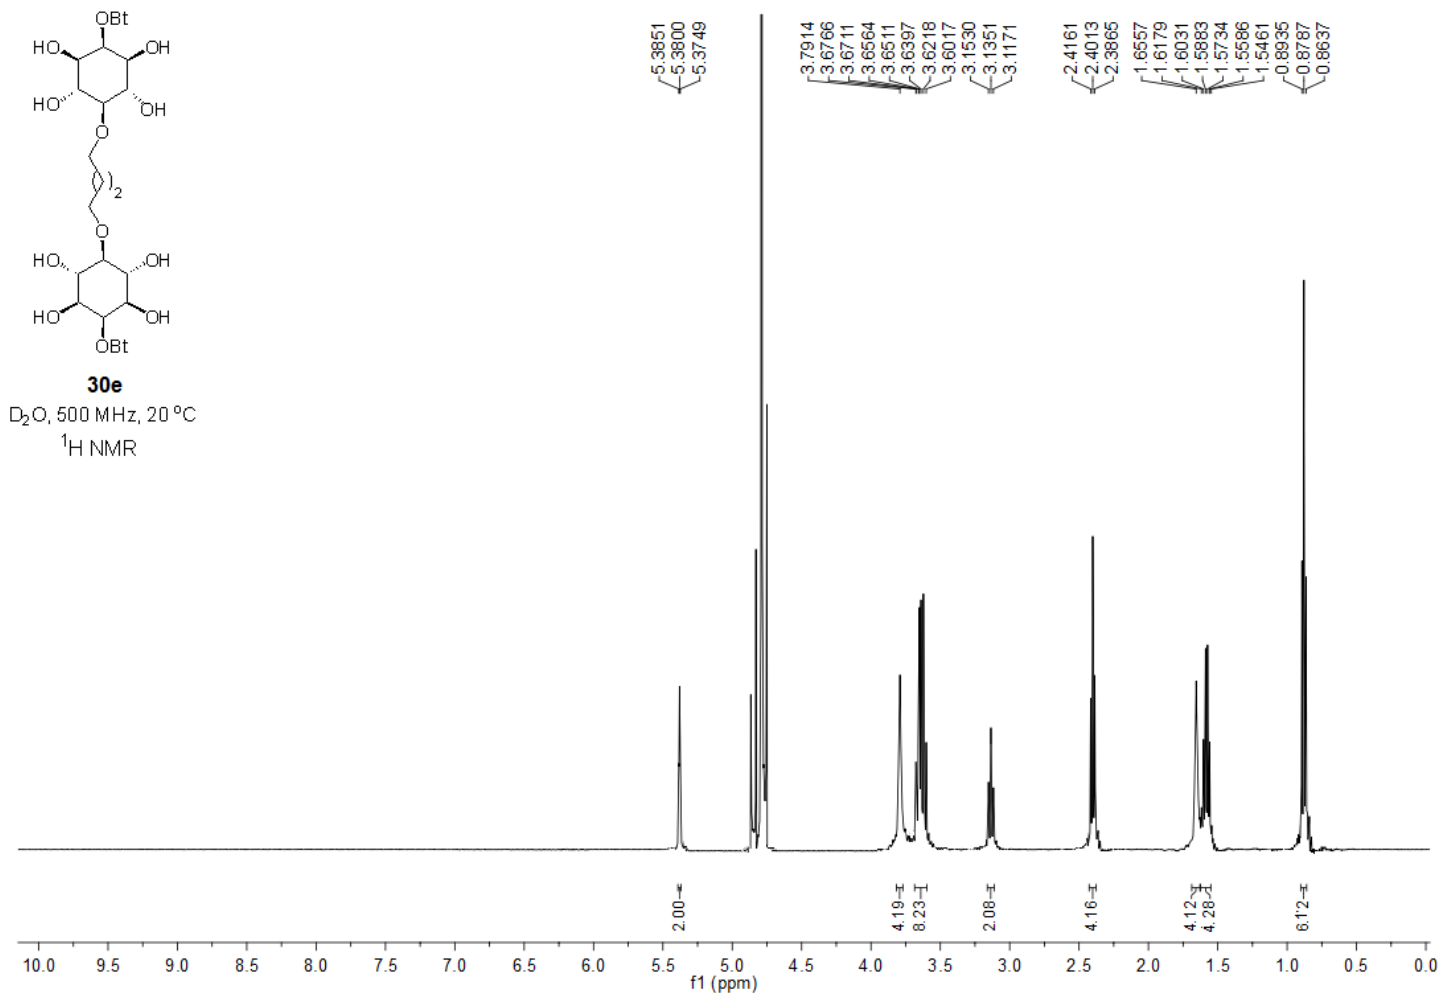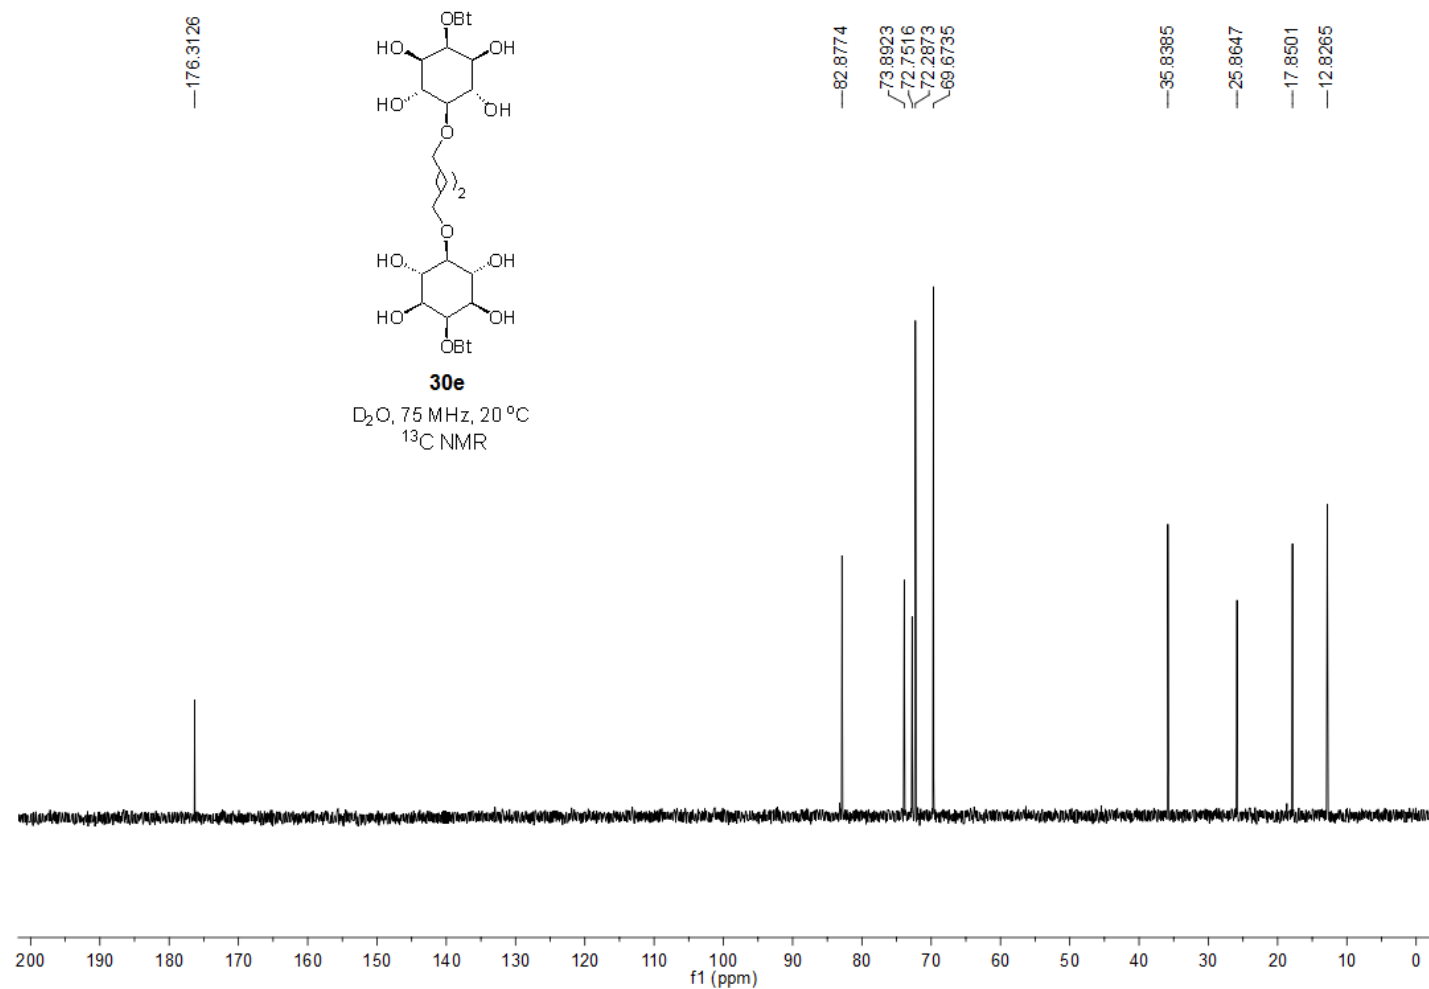

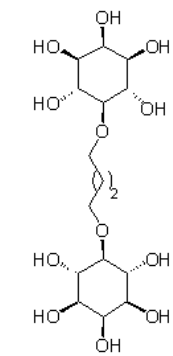

**30f**

D<sub>2</sub>O, 500 MHz, 20 °C  
<sup>1</sup>H NMR

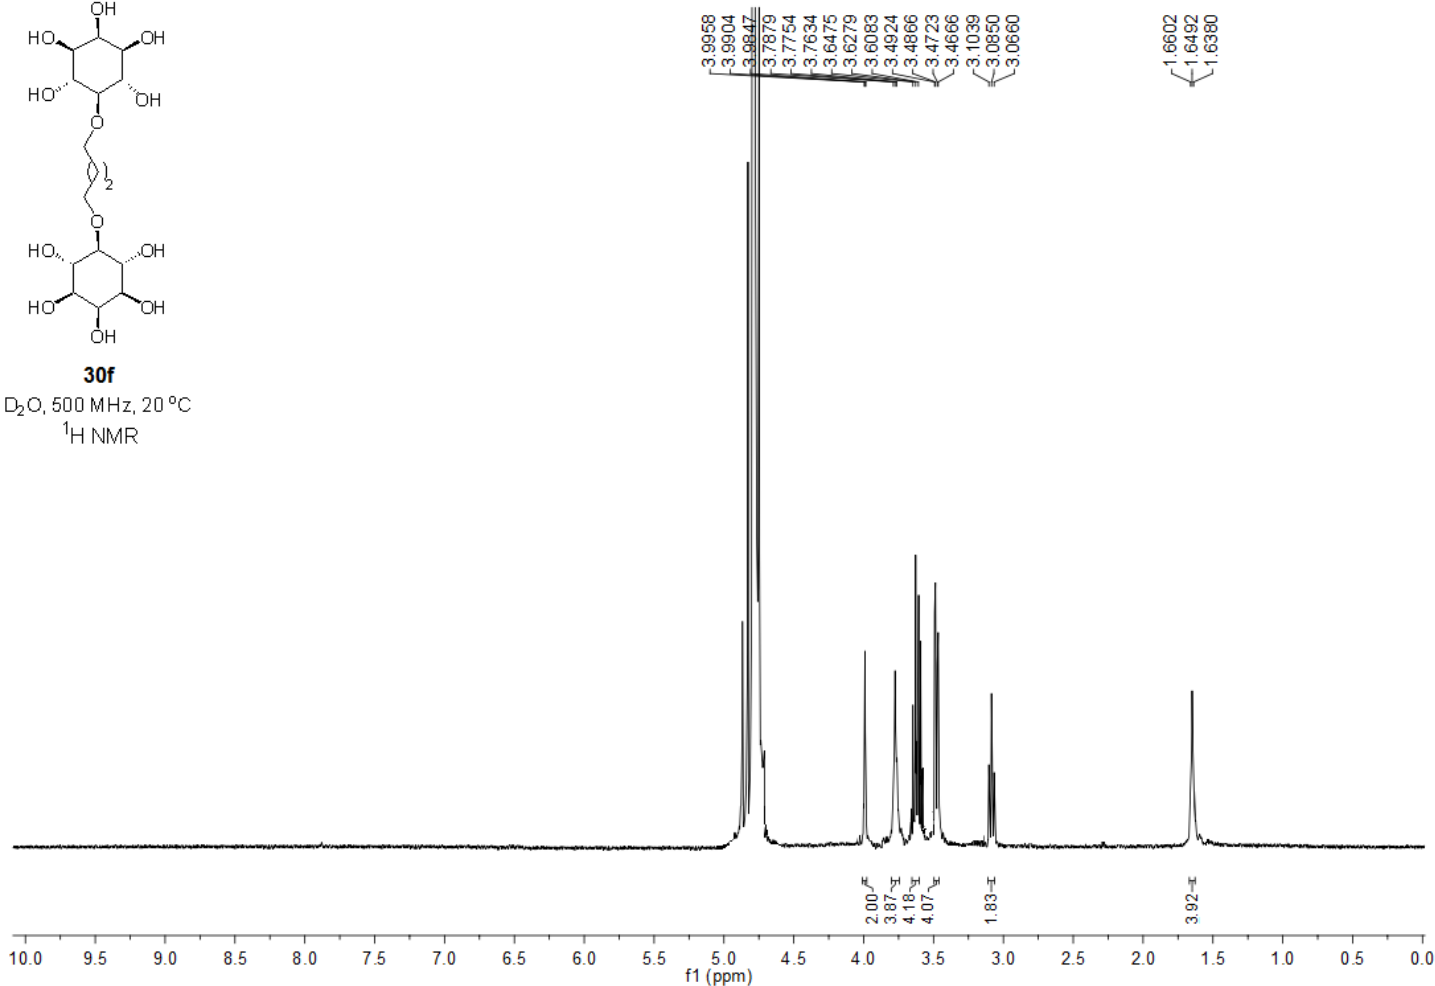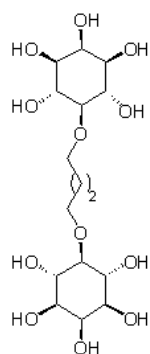

**30f**

D<sub>2</sub>O, 126 MHz, 20 °C  
<sup>13</sup>C NMR

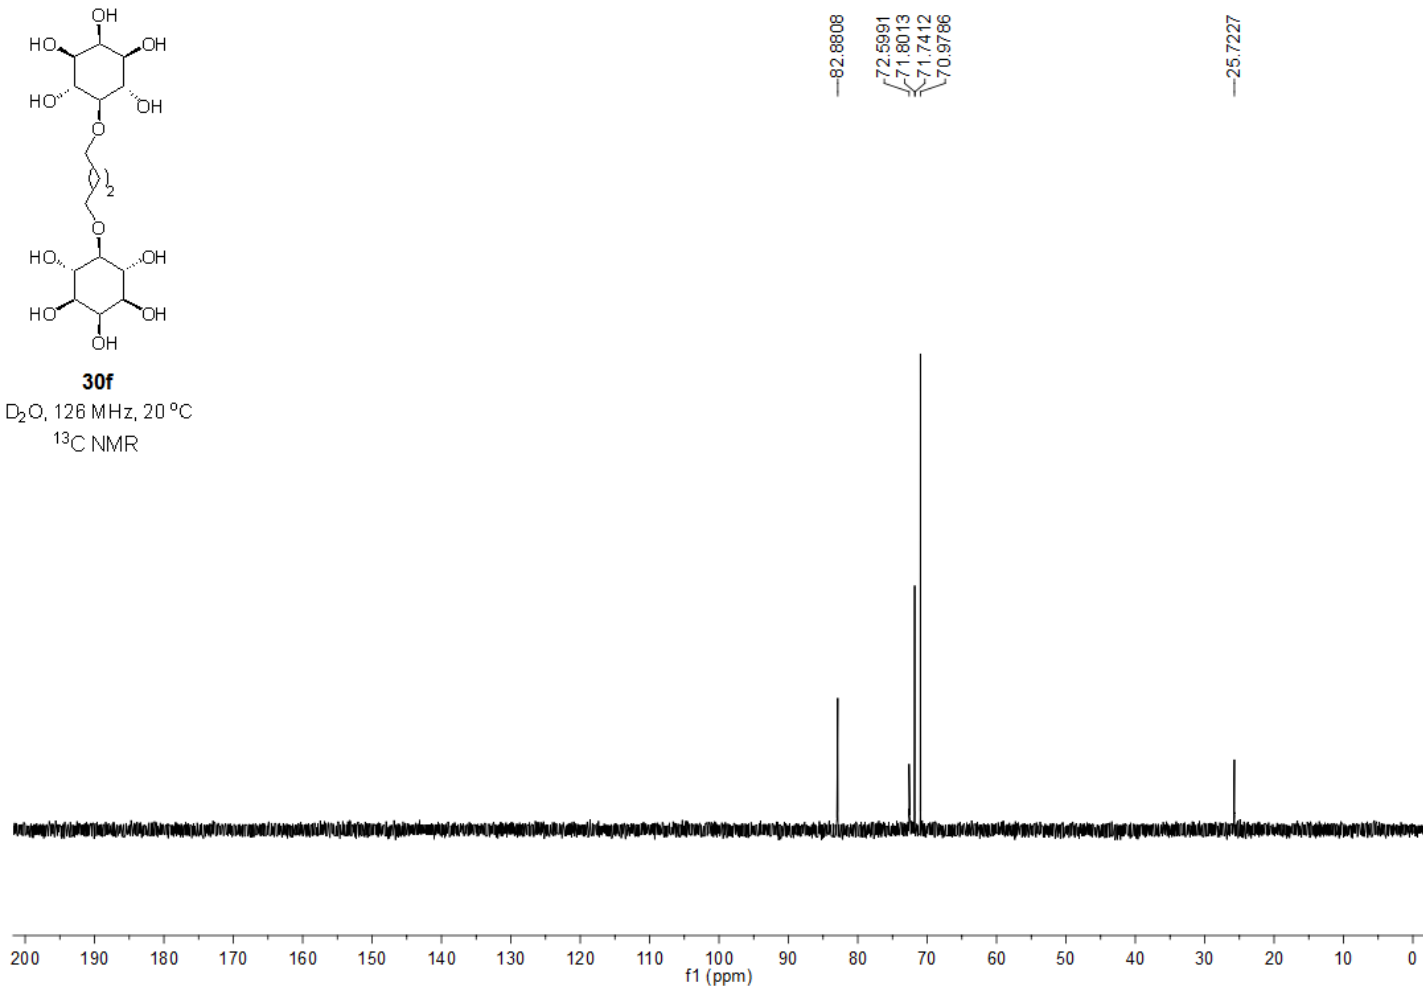

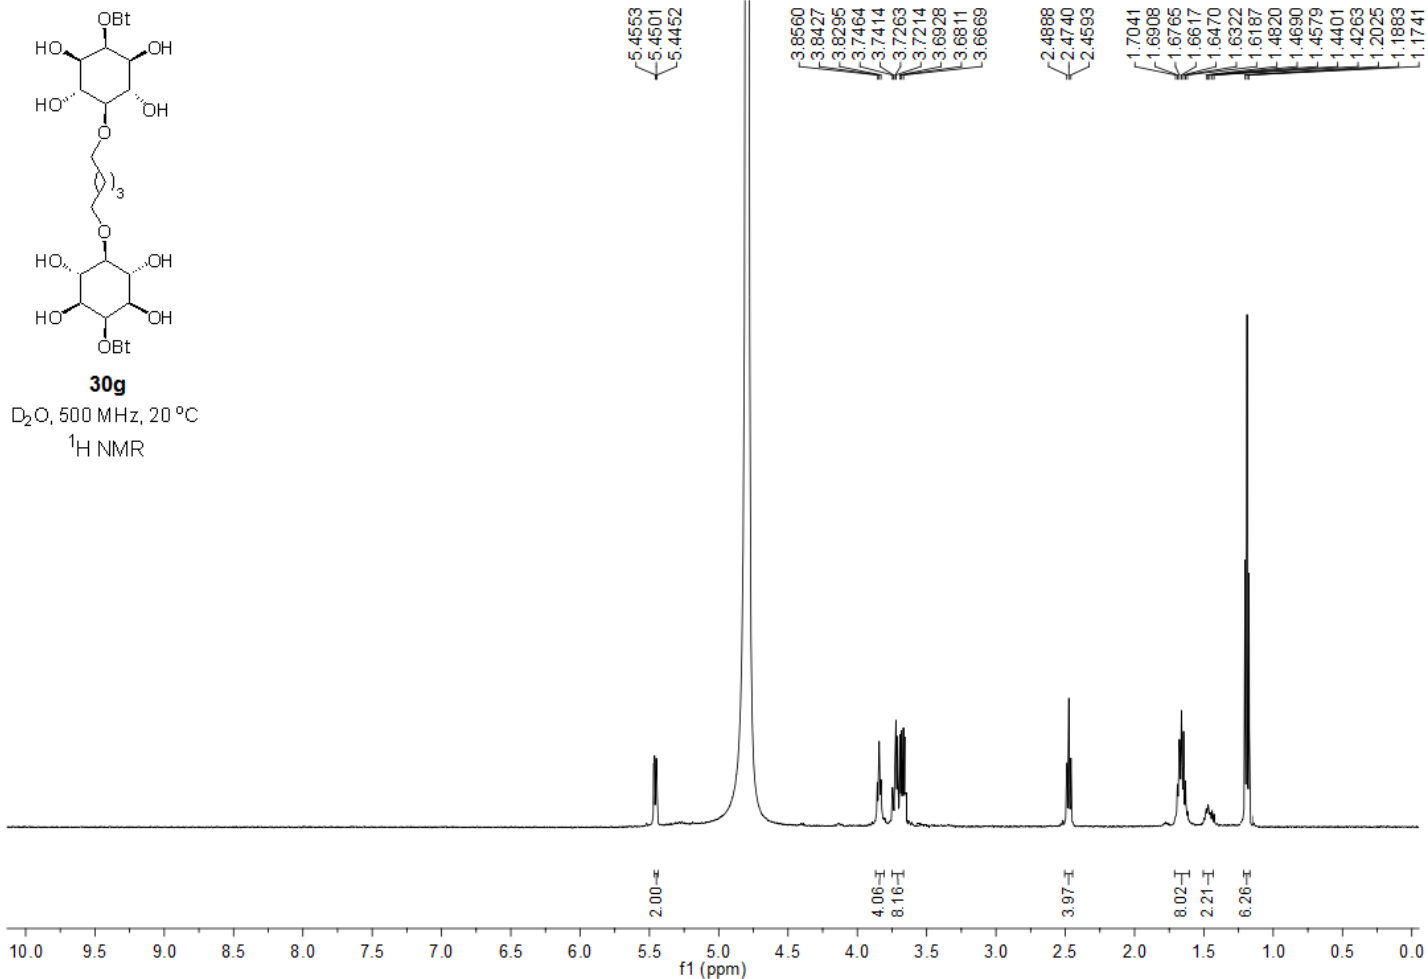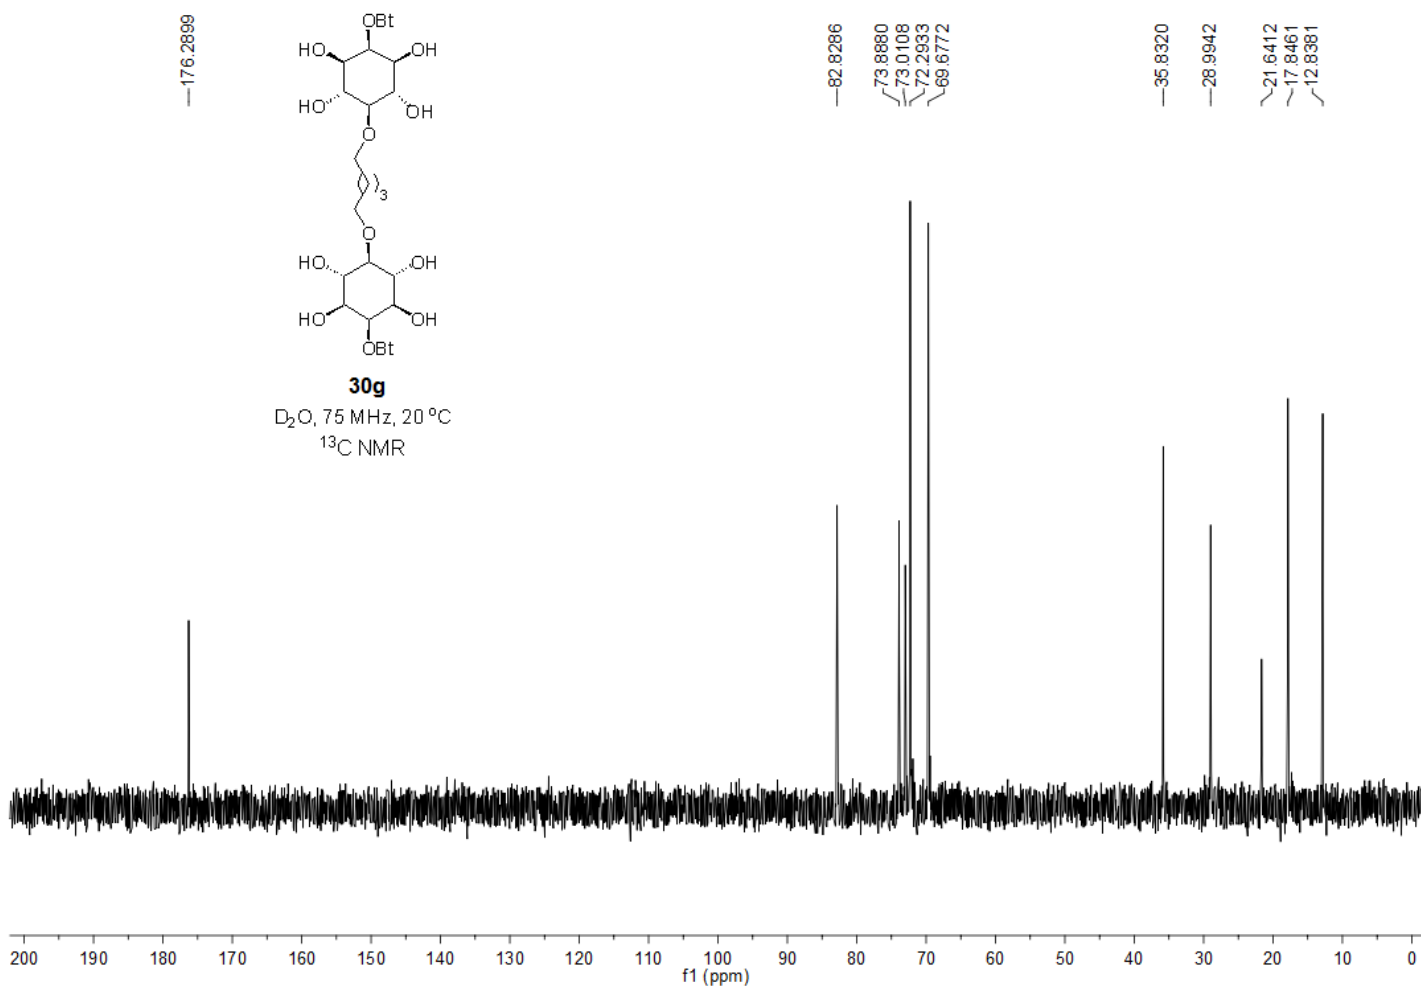

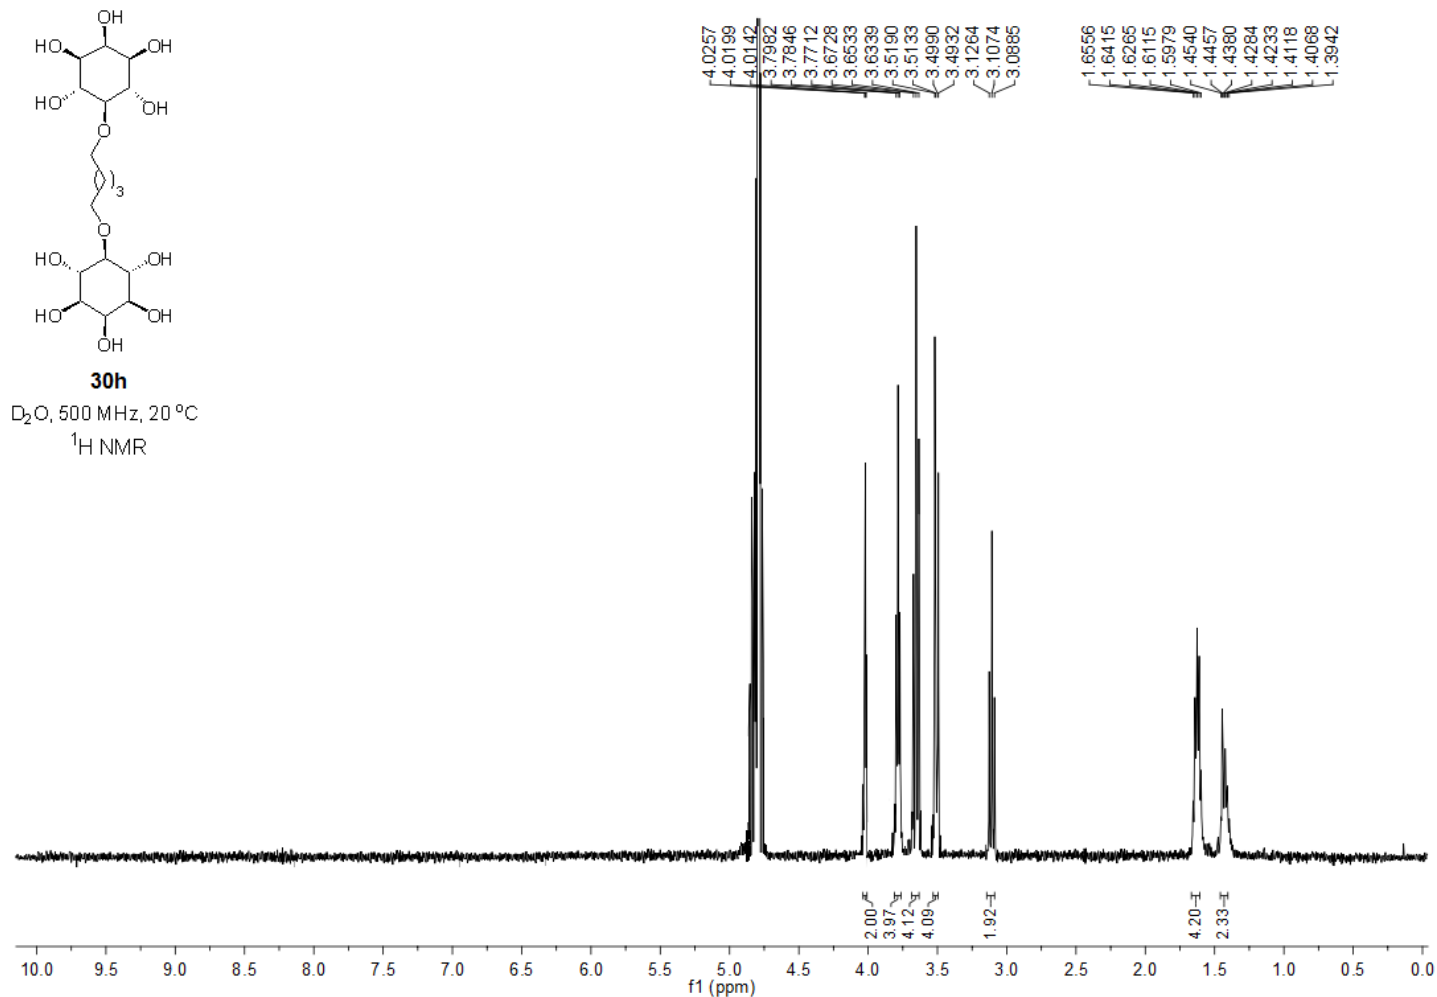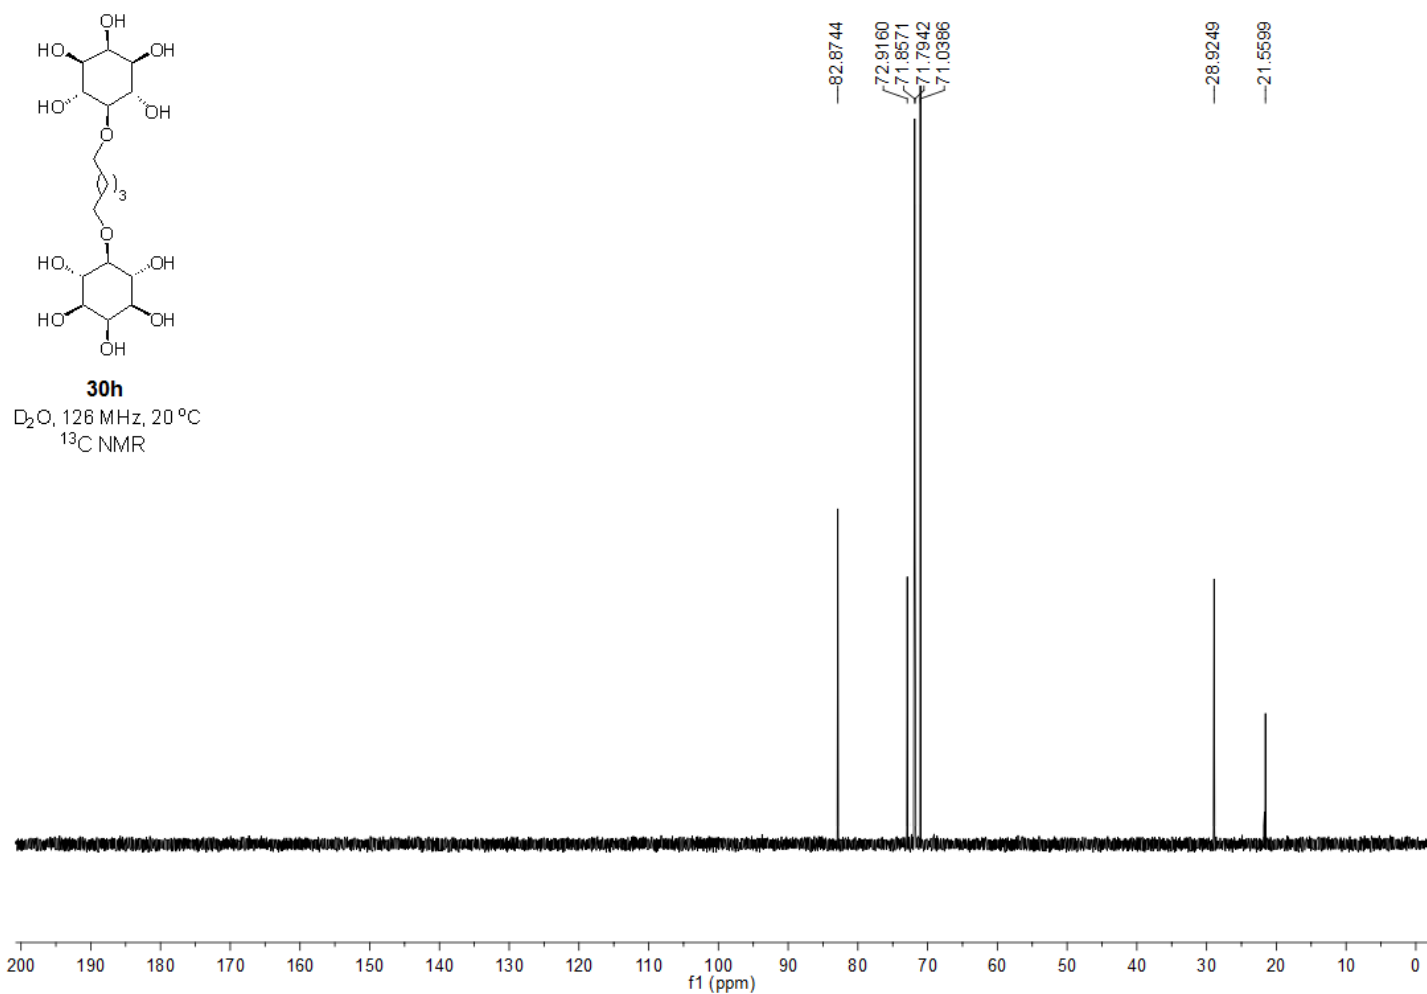

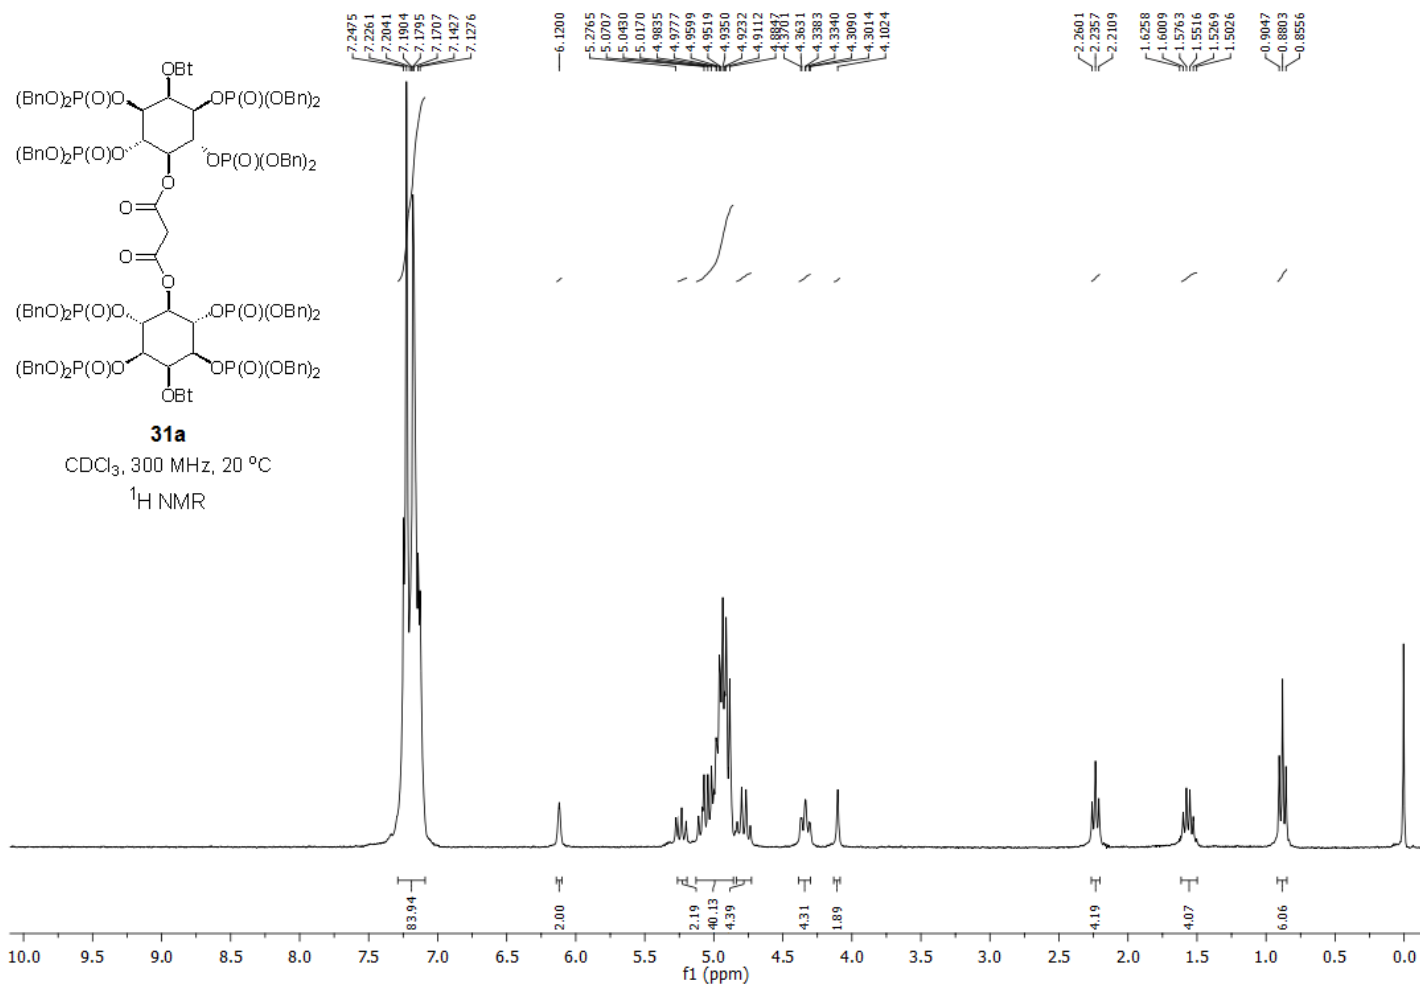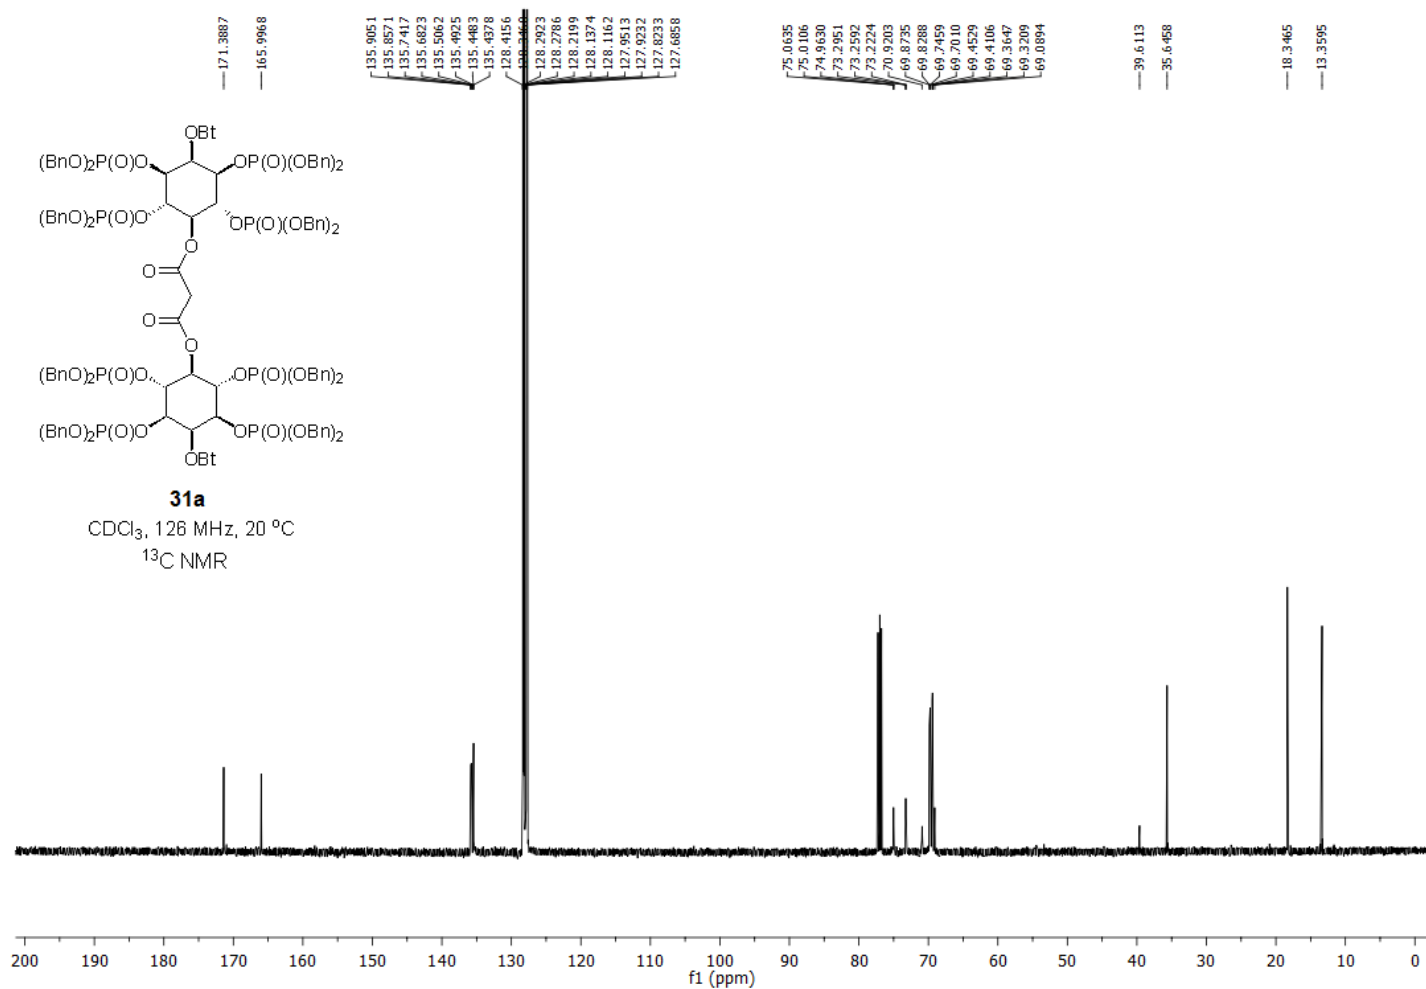

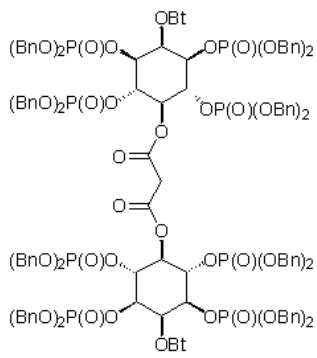

**31a**

$\text{CDCl}_3$ , 121 MHz, 20 °C  
 $^{31}\text{P}$  NMR

-1.2499  
-1.7846

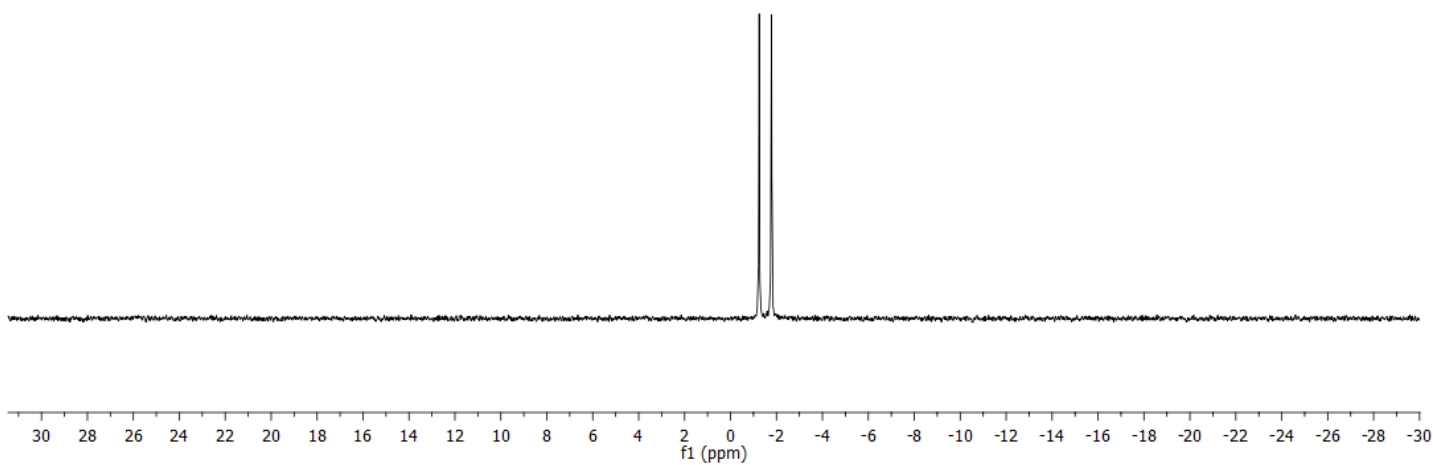

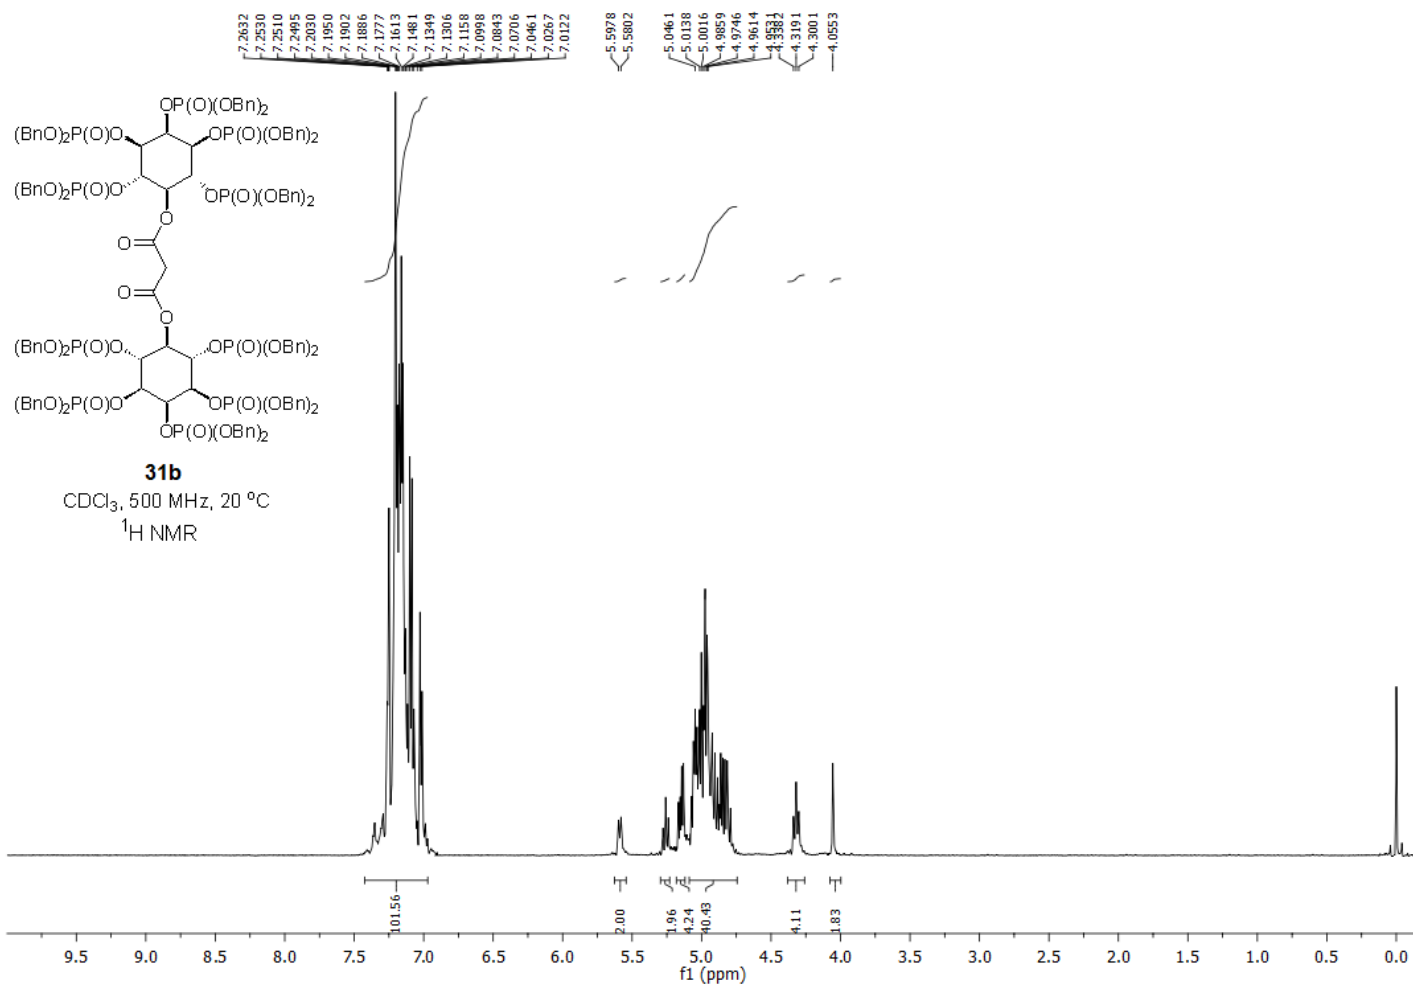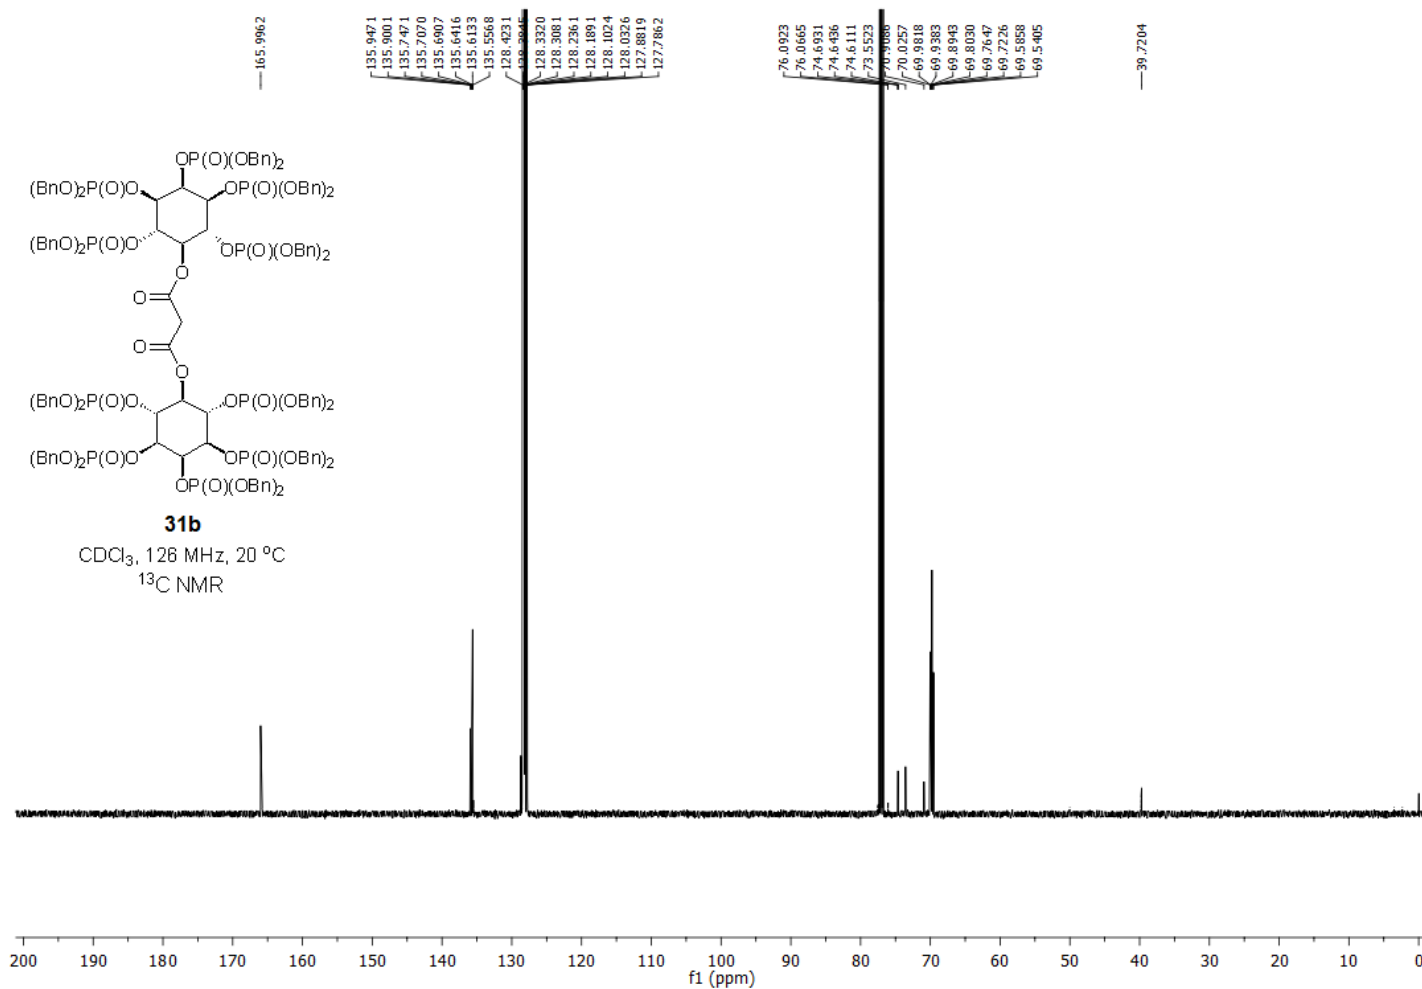



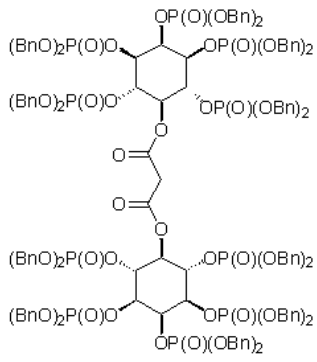

**31b**

CDCl<sub>3</sub>, 121 MHz, 20 °C  
<sup>31</sup>P NMR

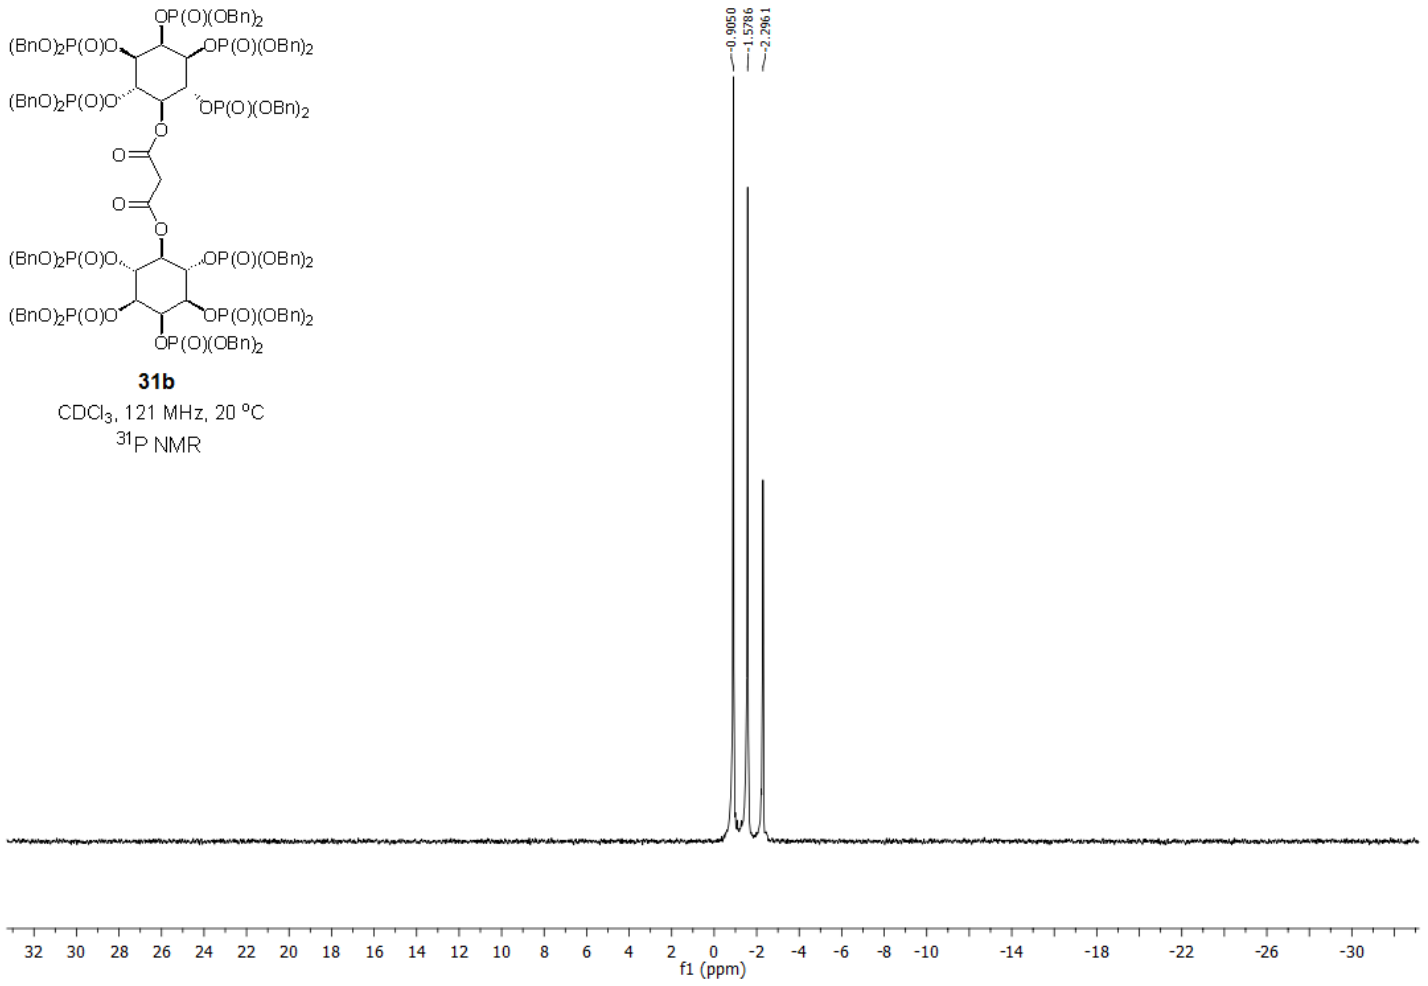

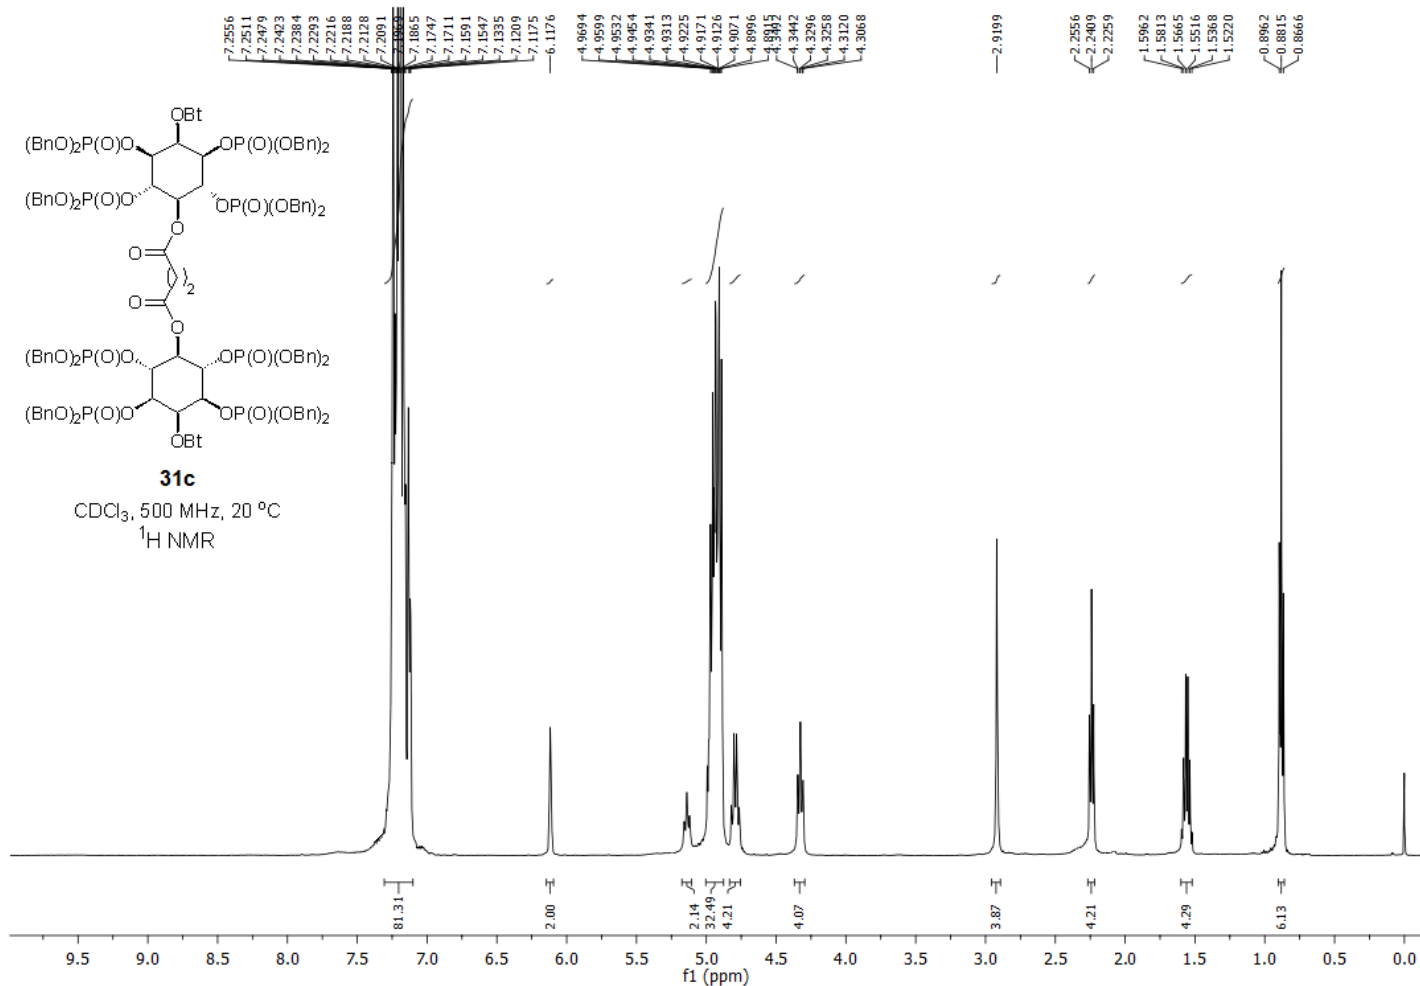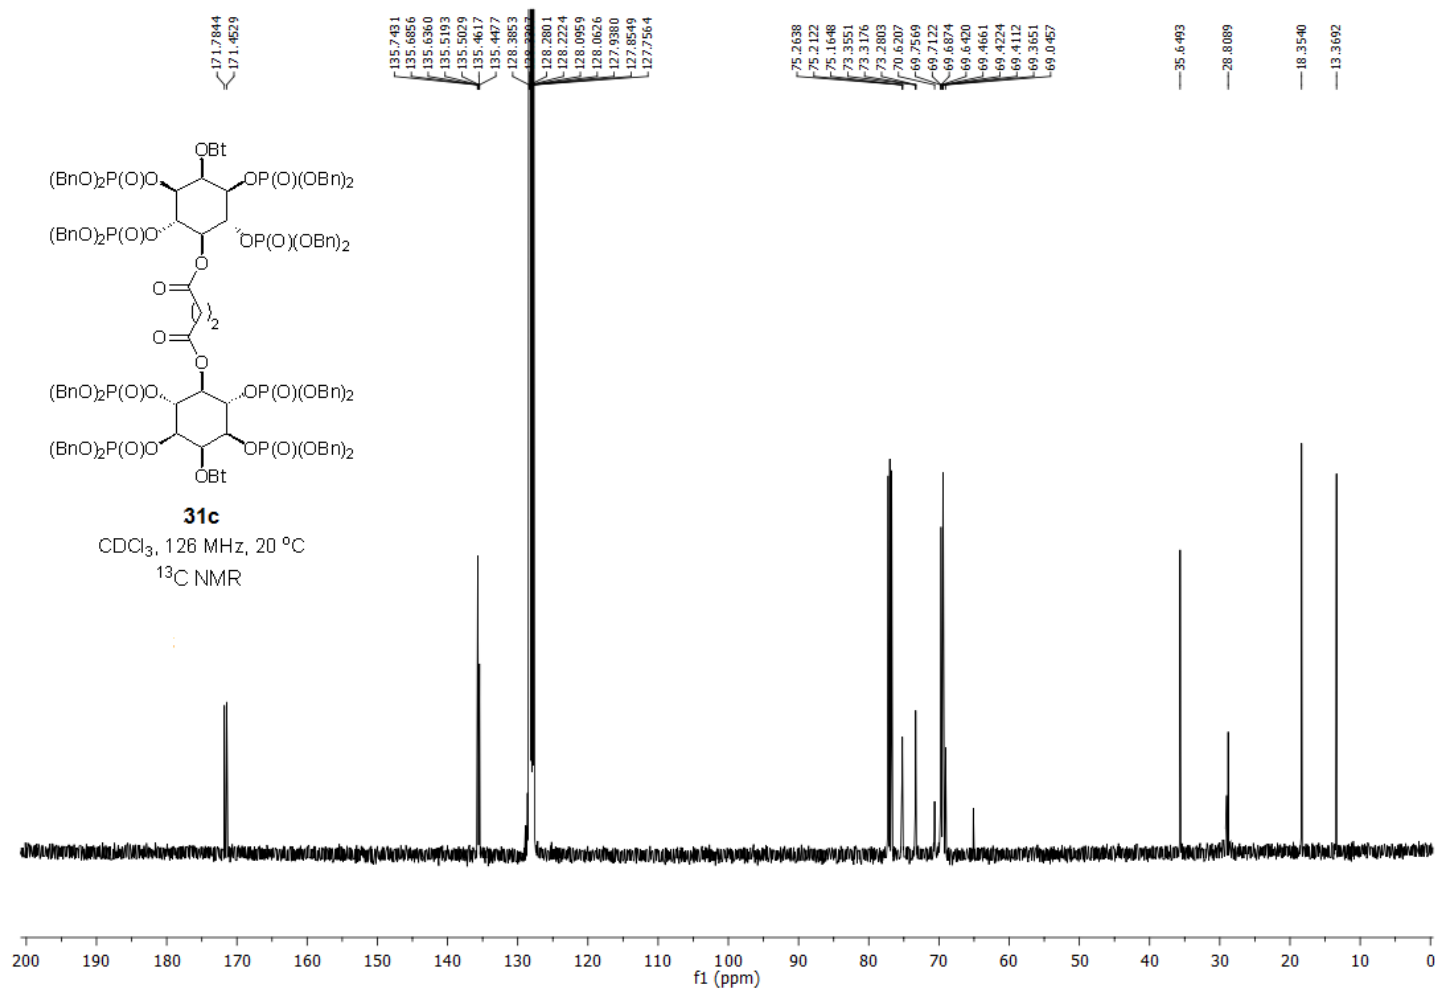

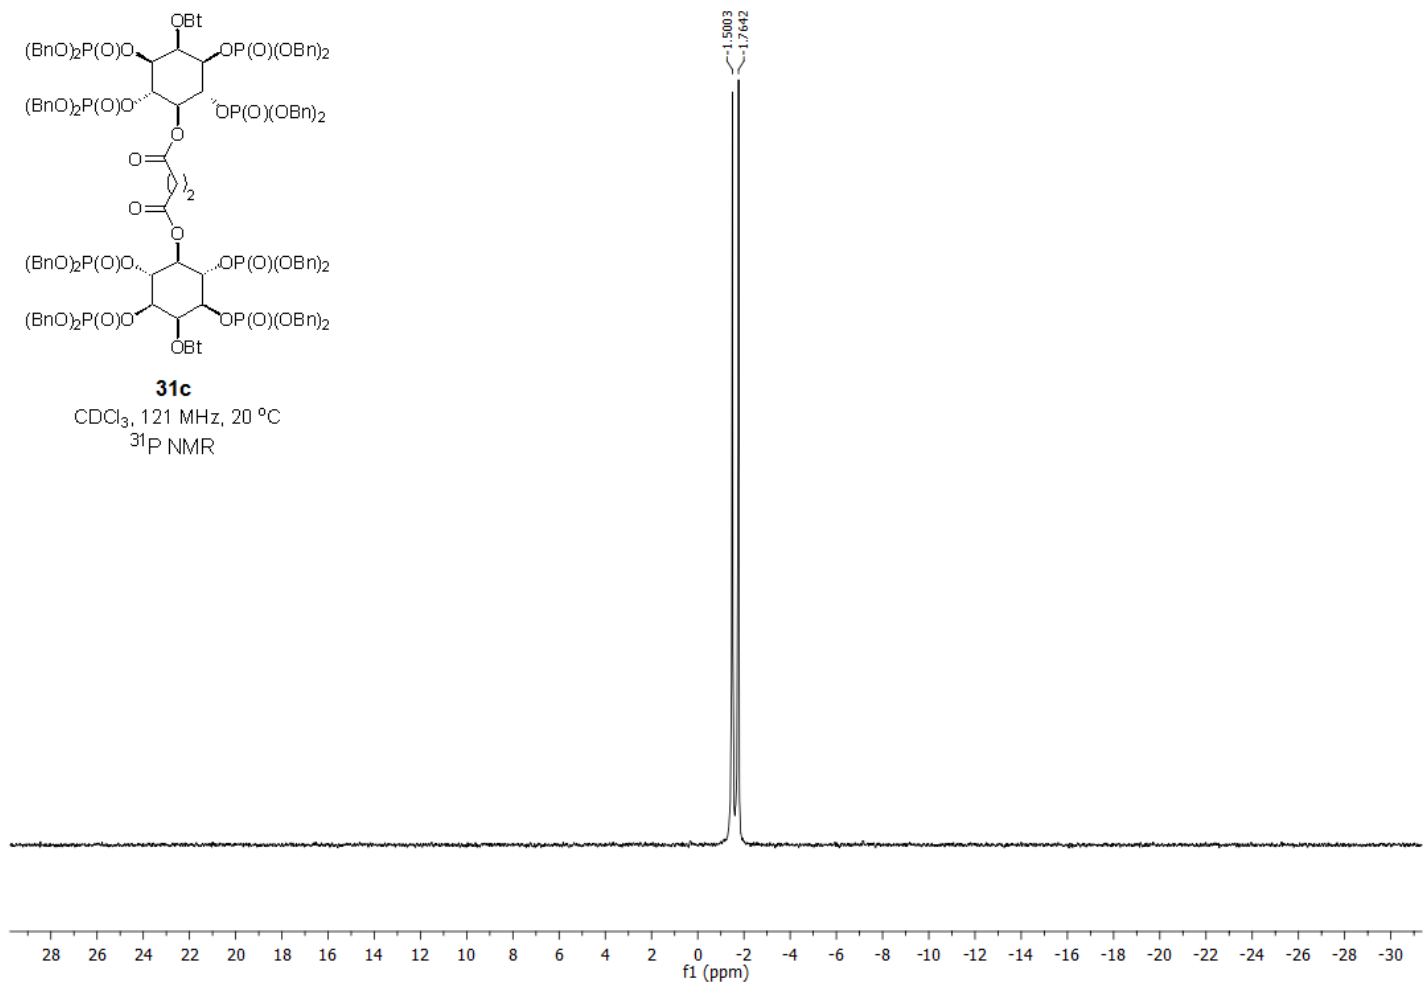

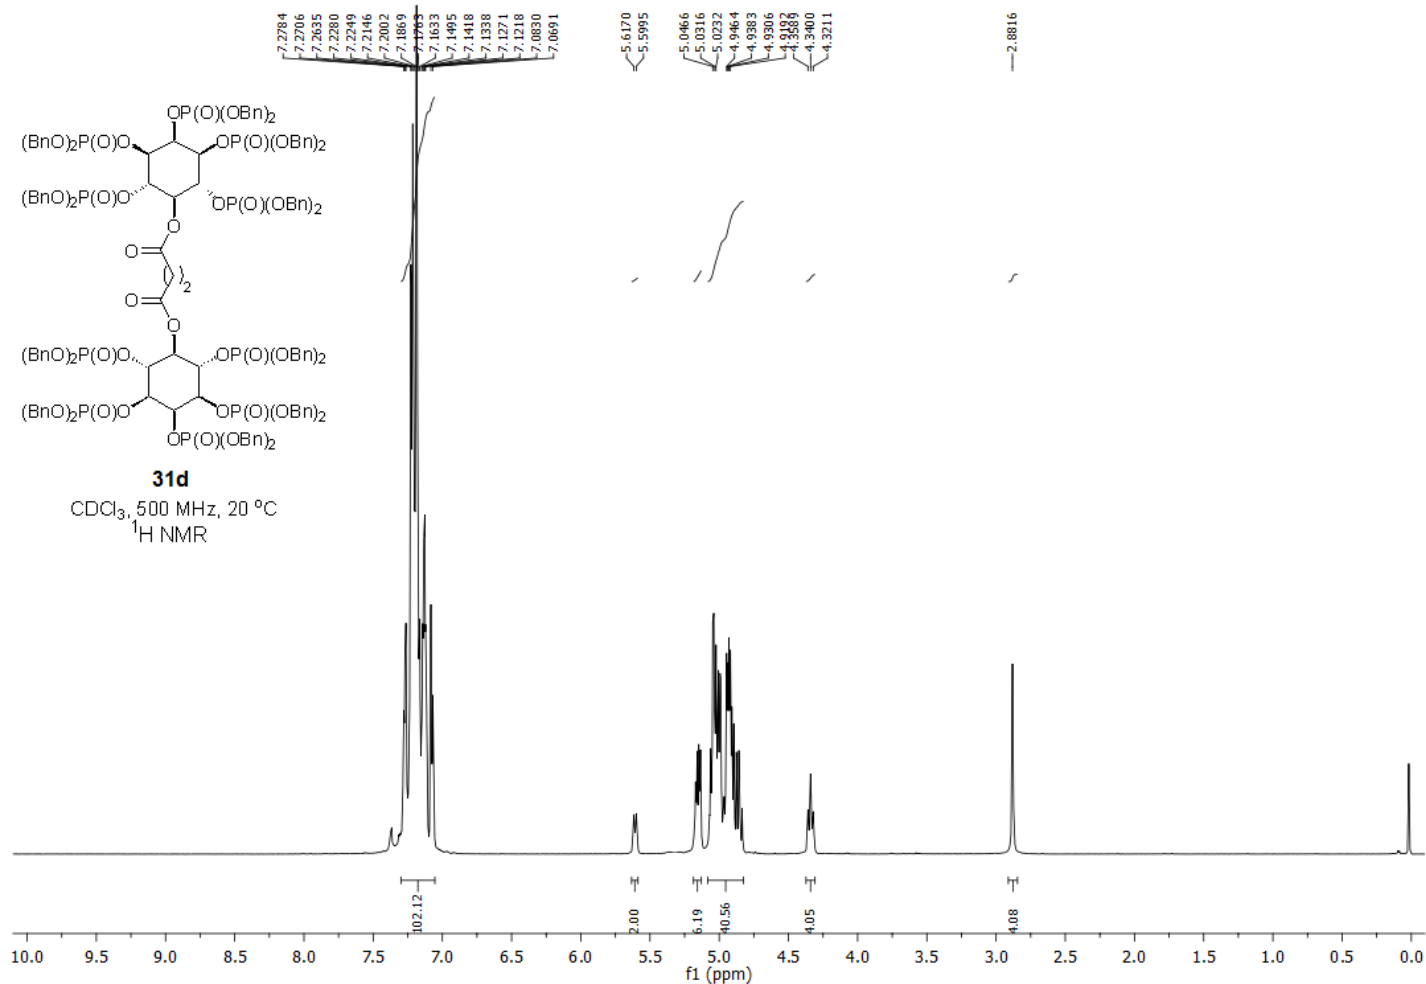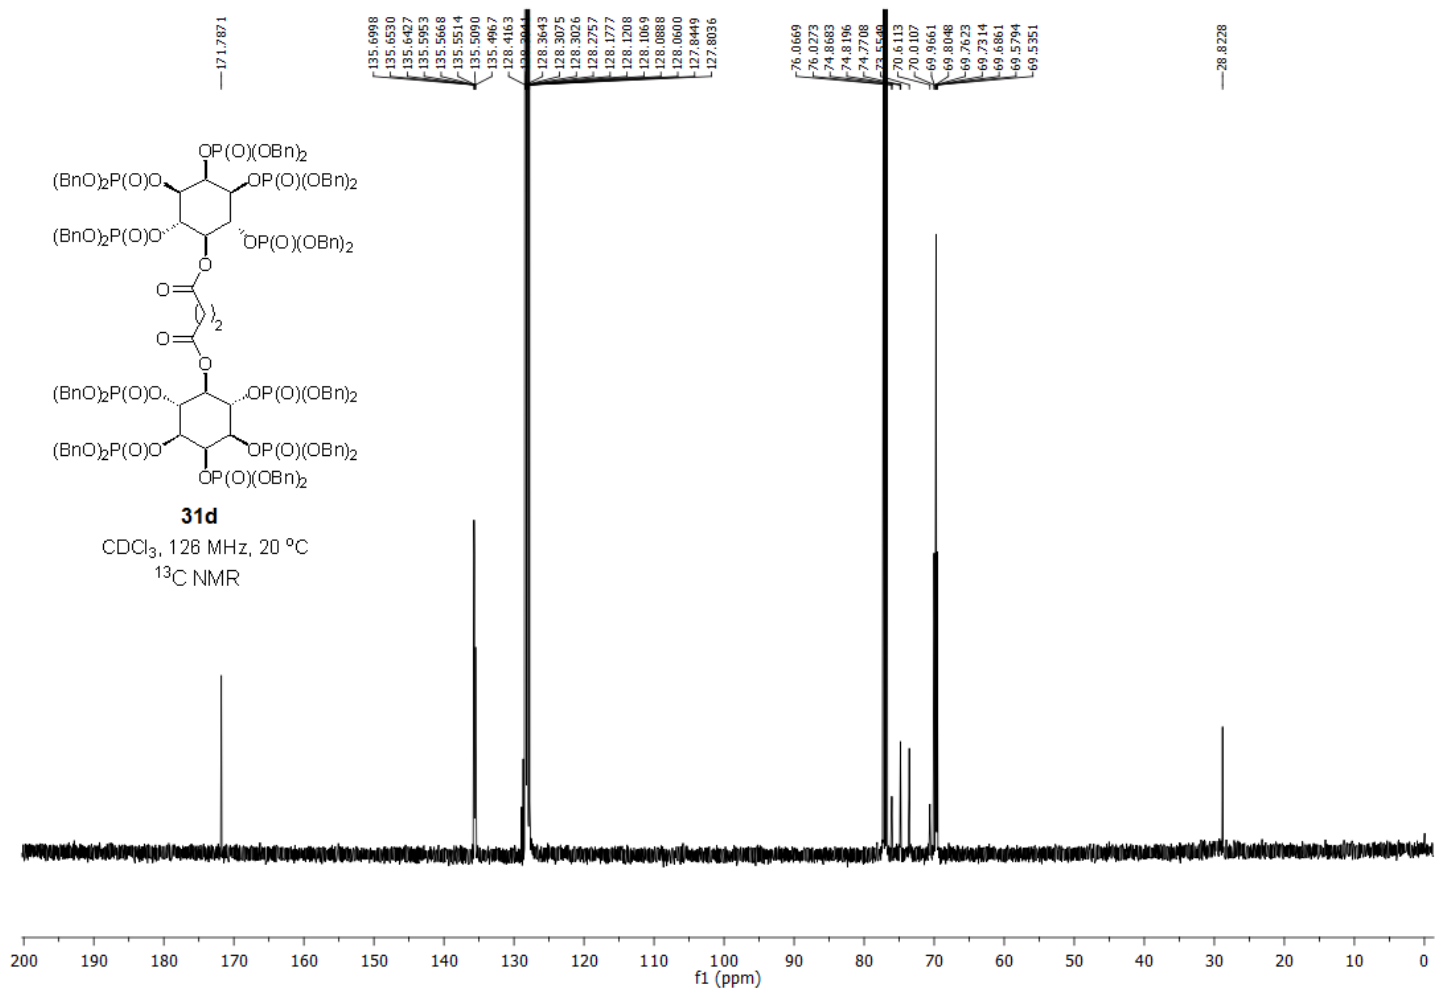

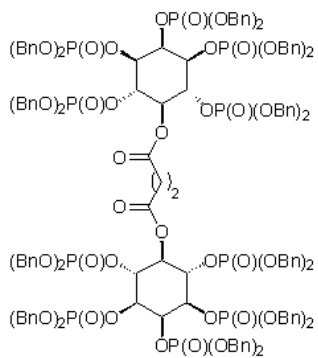

**31d**

CDCl<sub>3</sub>, 121 MHz, 20 °C

<sup>31</sup>P NMR

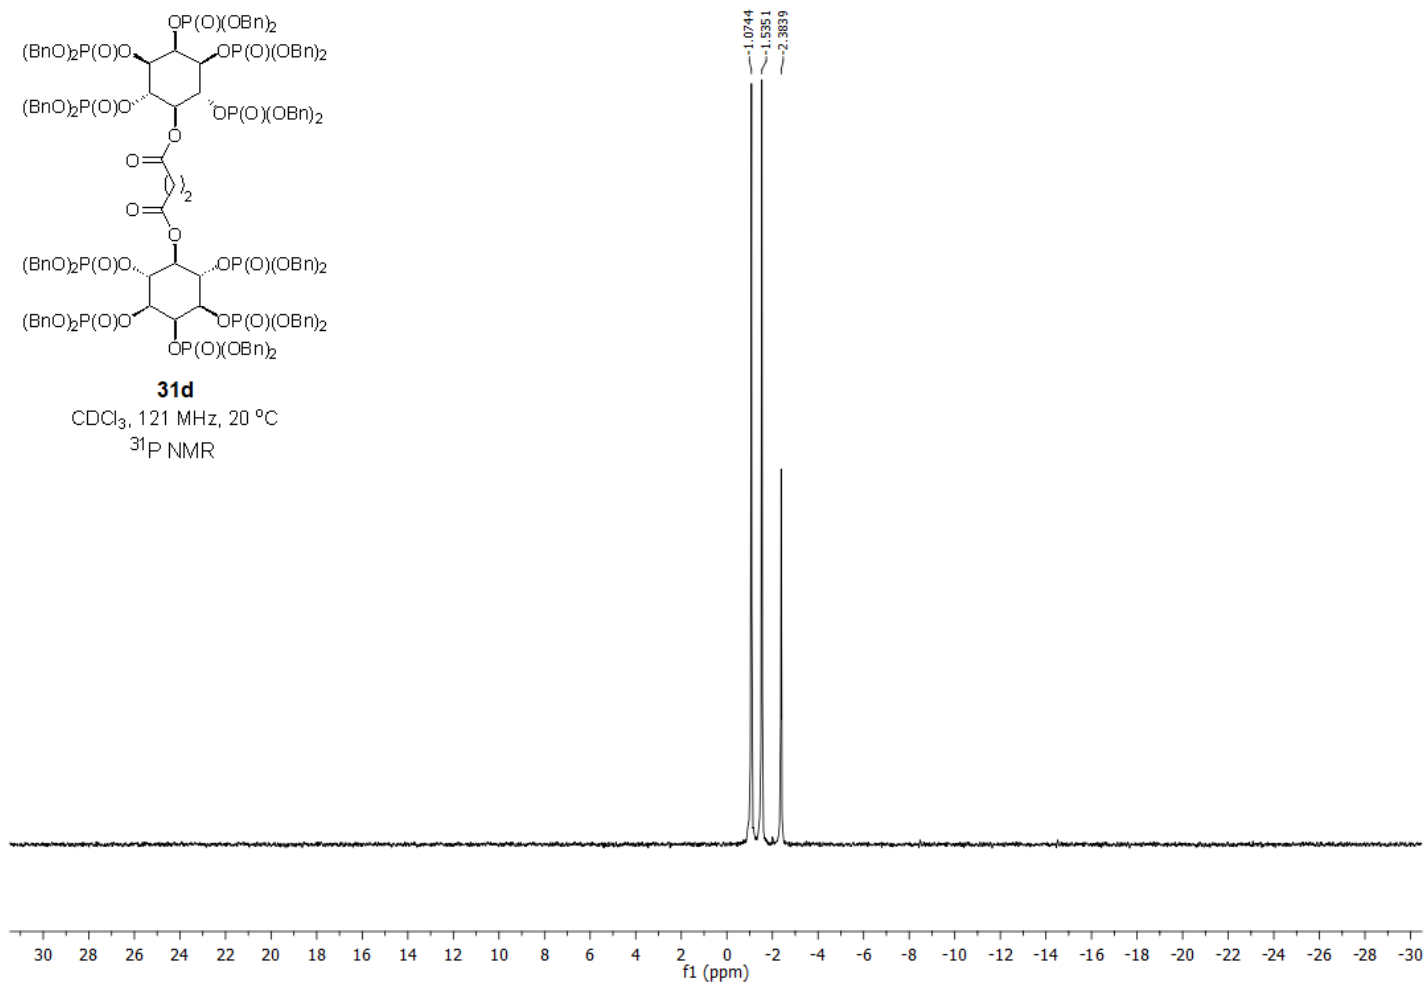

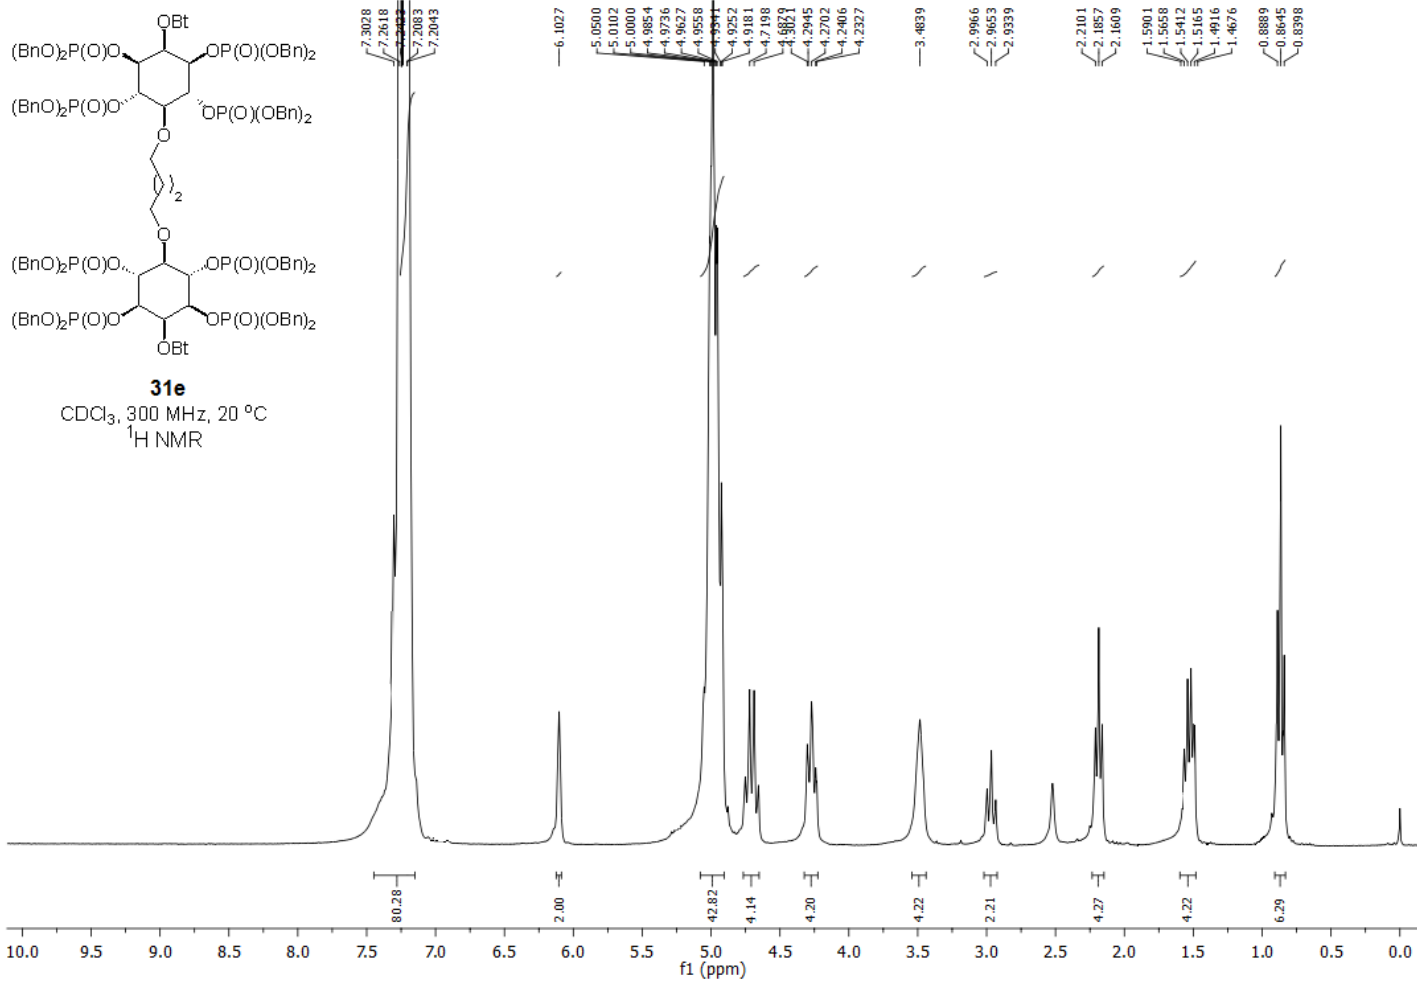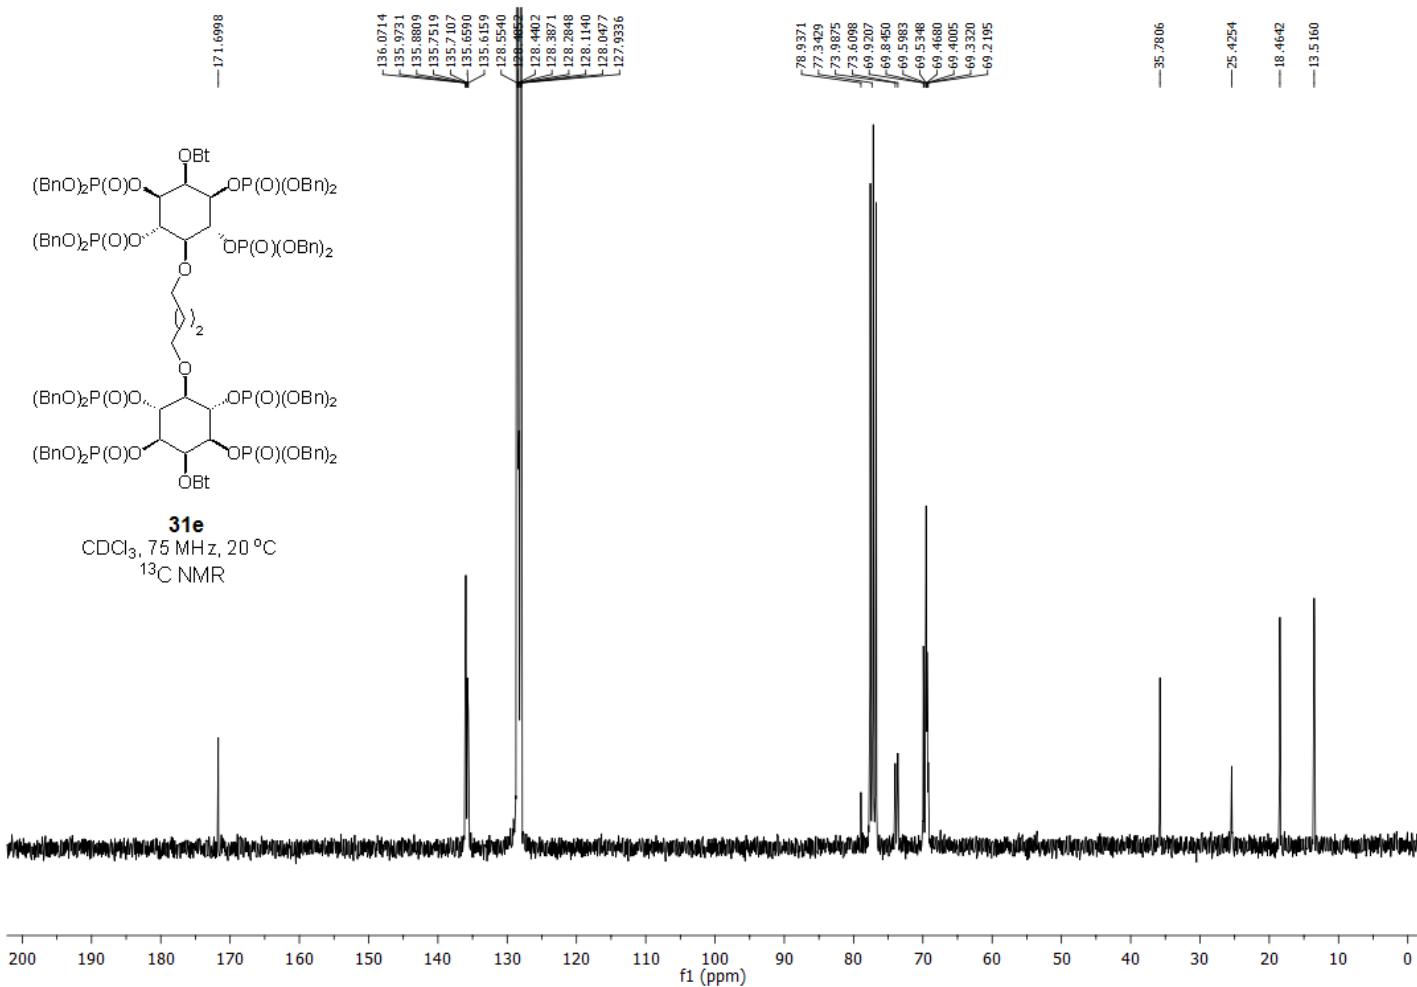

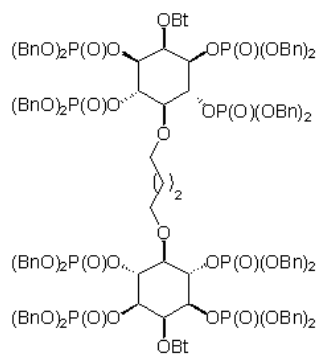

**31e**

CDCl<sub>3</sub>, 121 MHz, 20 °C

<sup>31</sup>P NMR

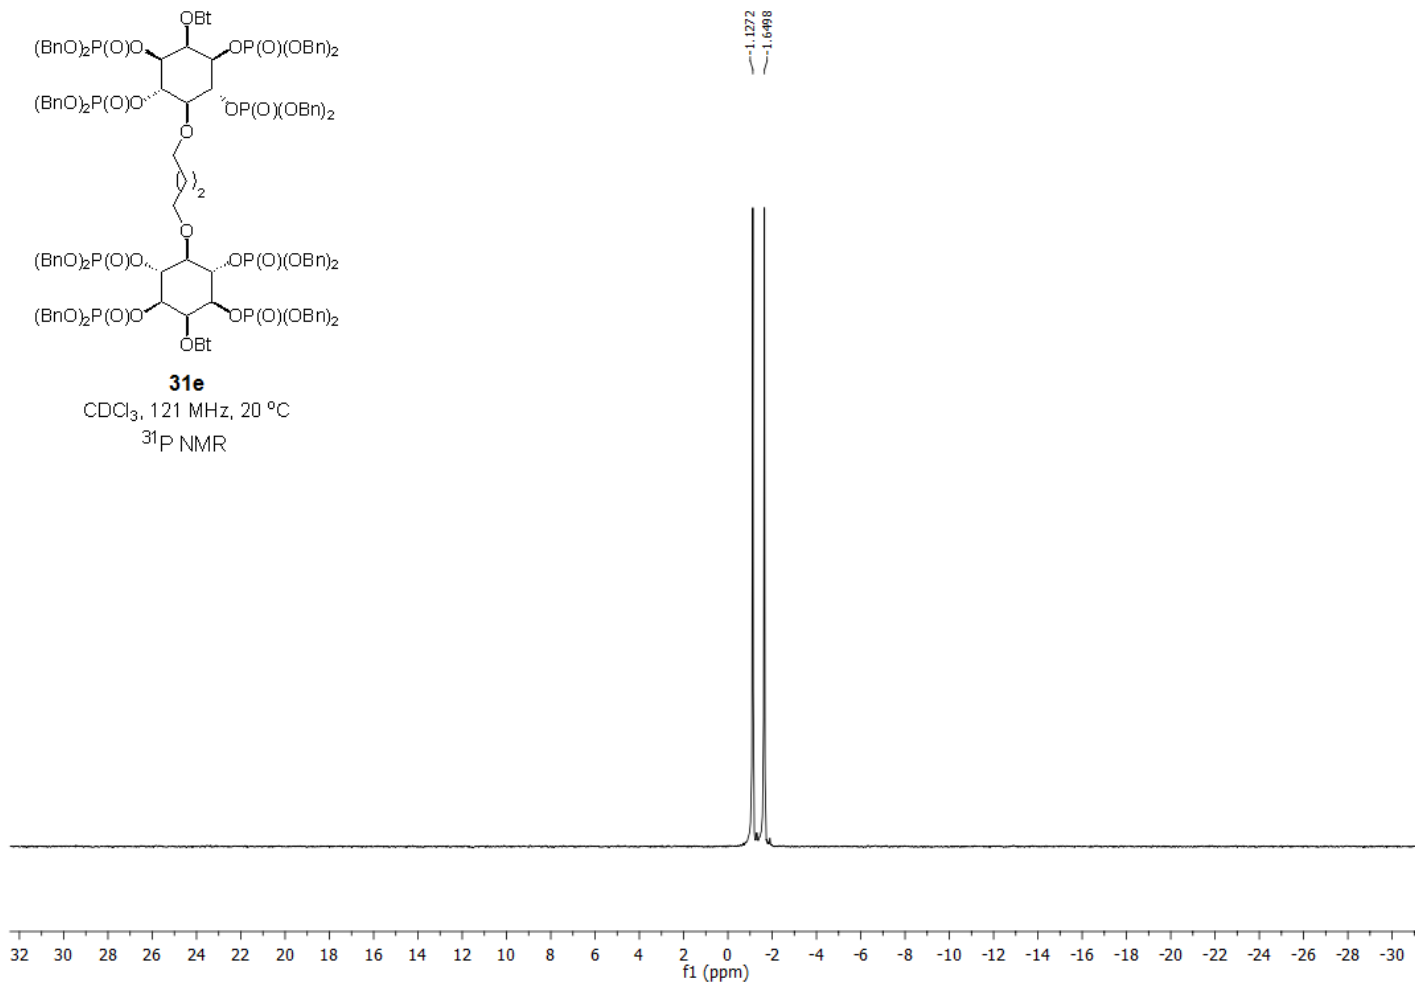

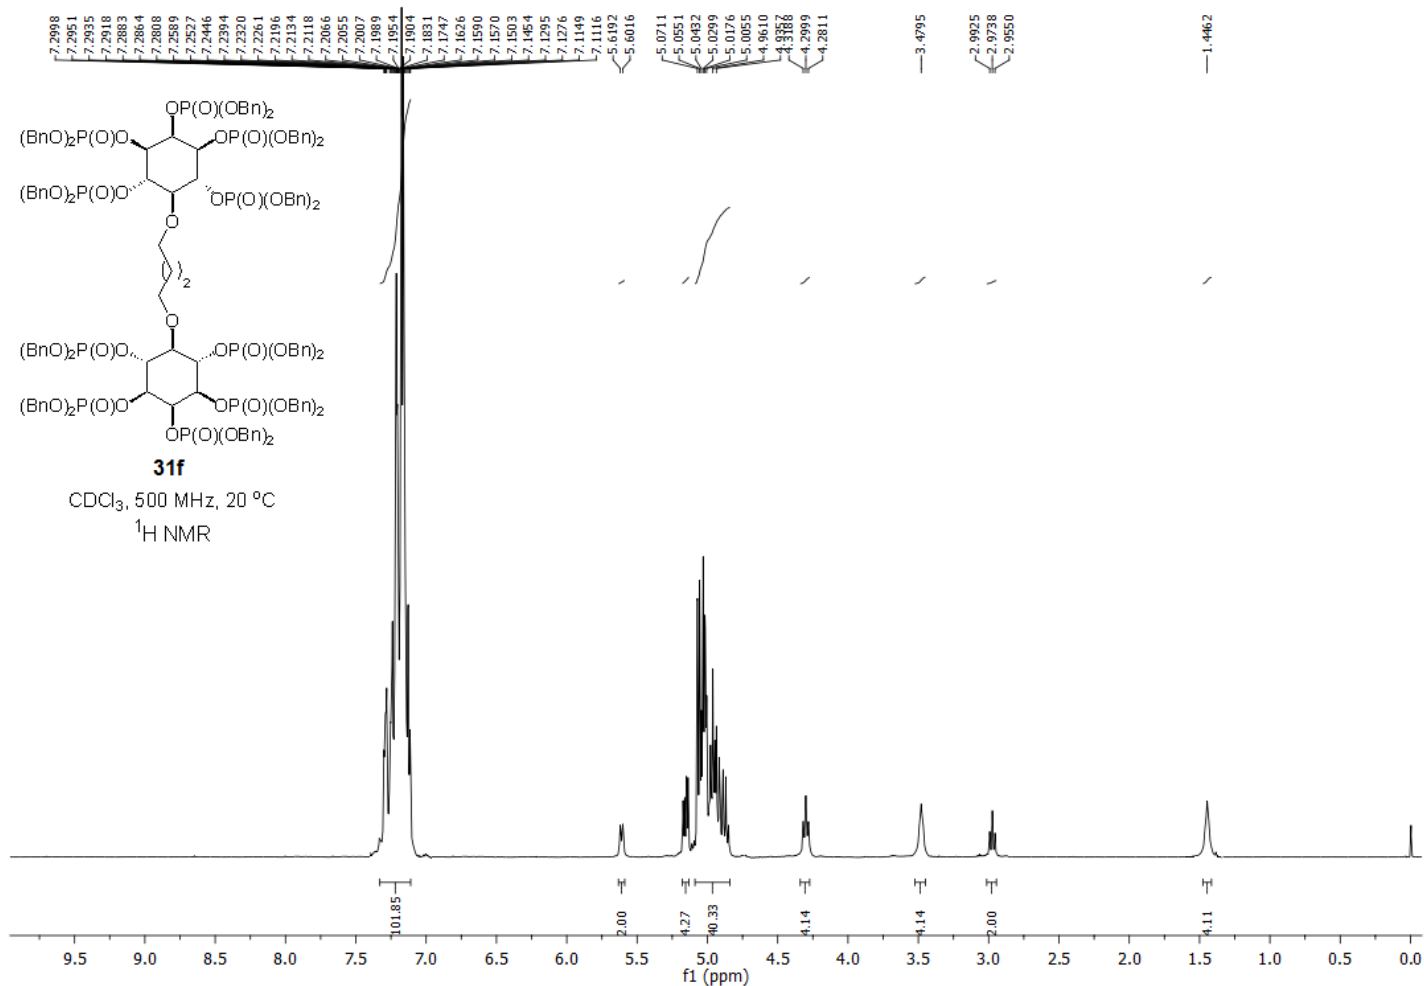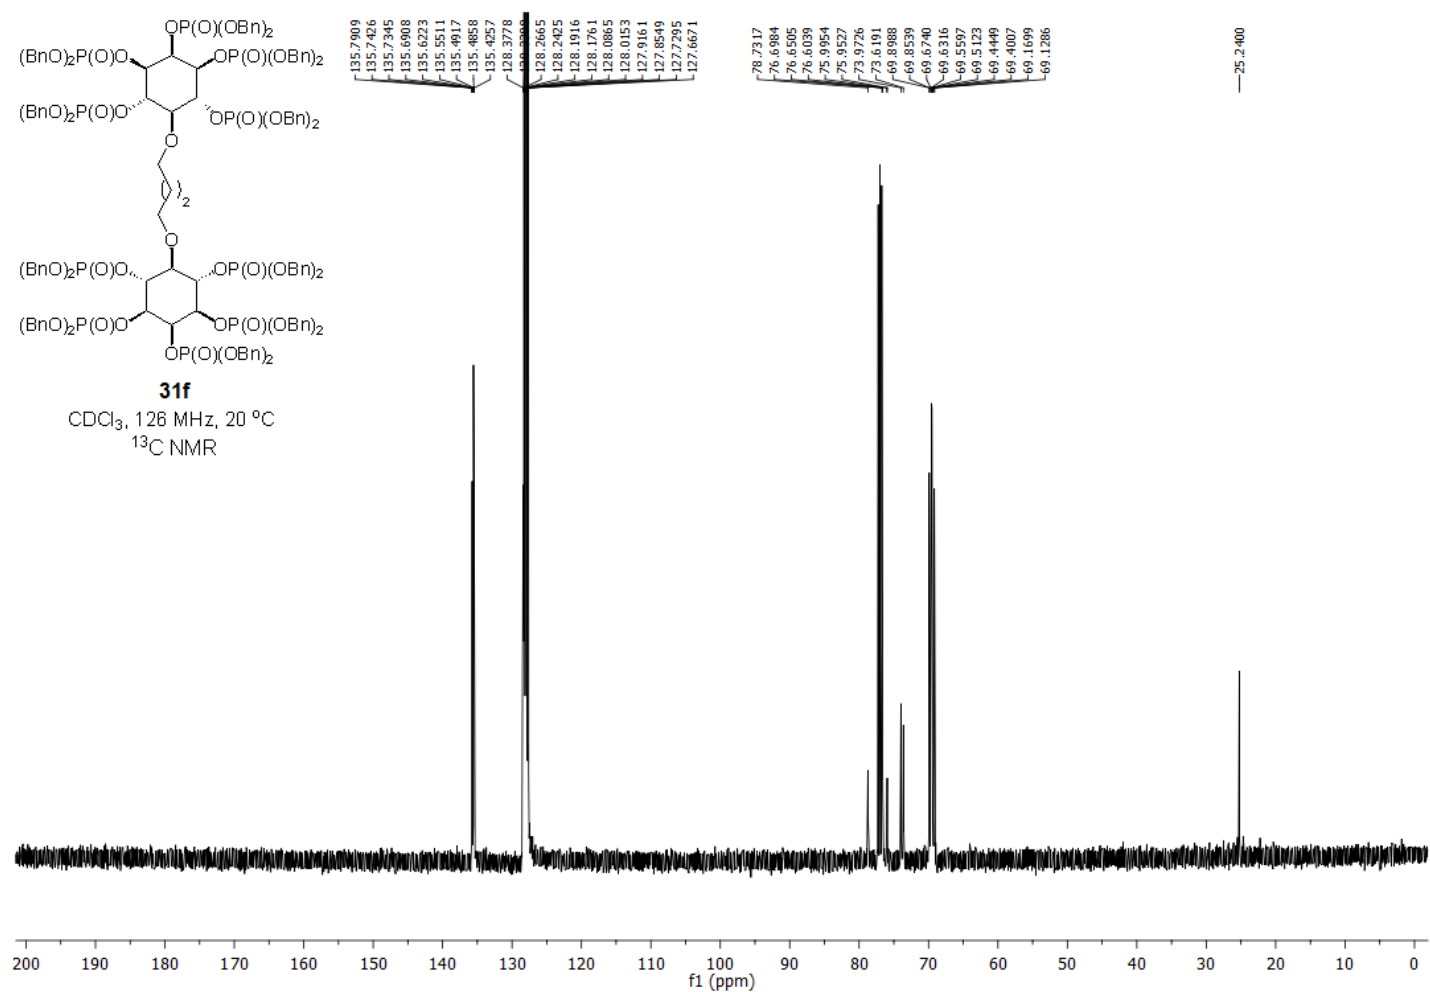





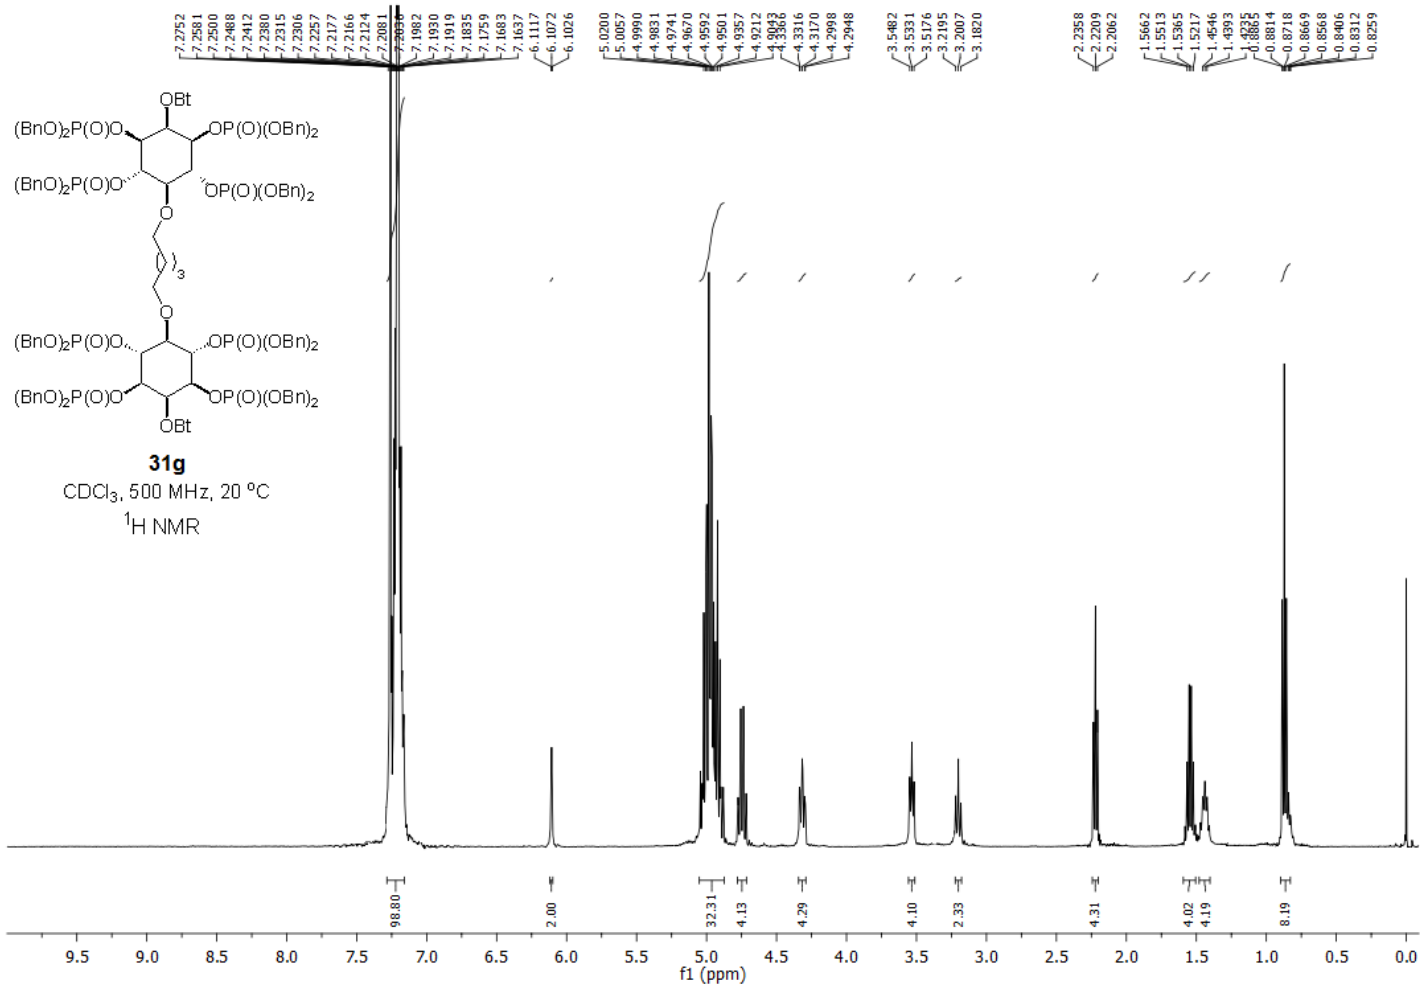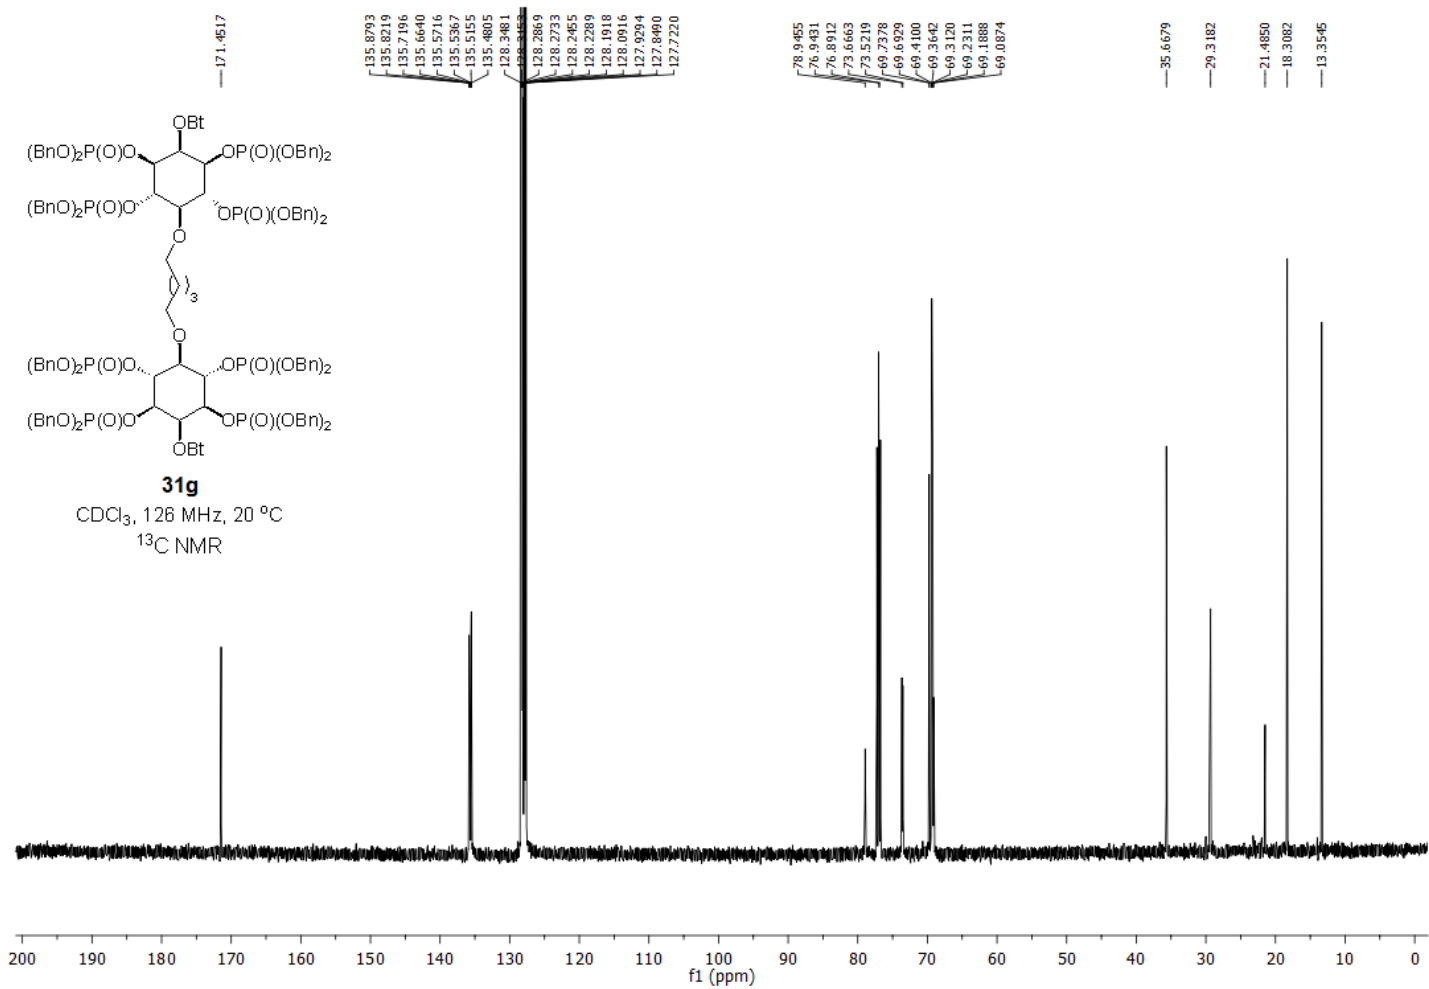

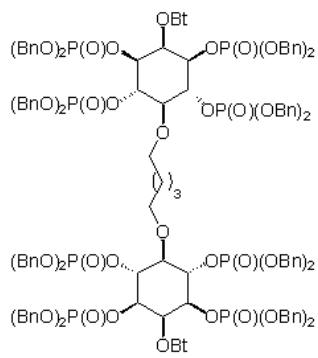

**31g**

CDCl<sub>3</sub>, 121 MHz, 20 °C

<sup>31</sup>P NMR

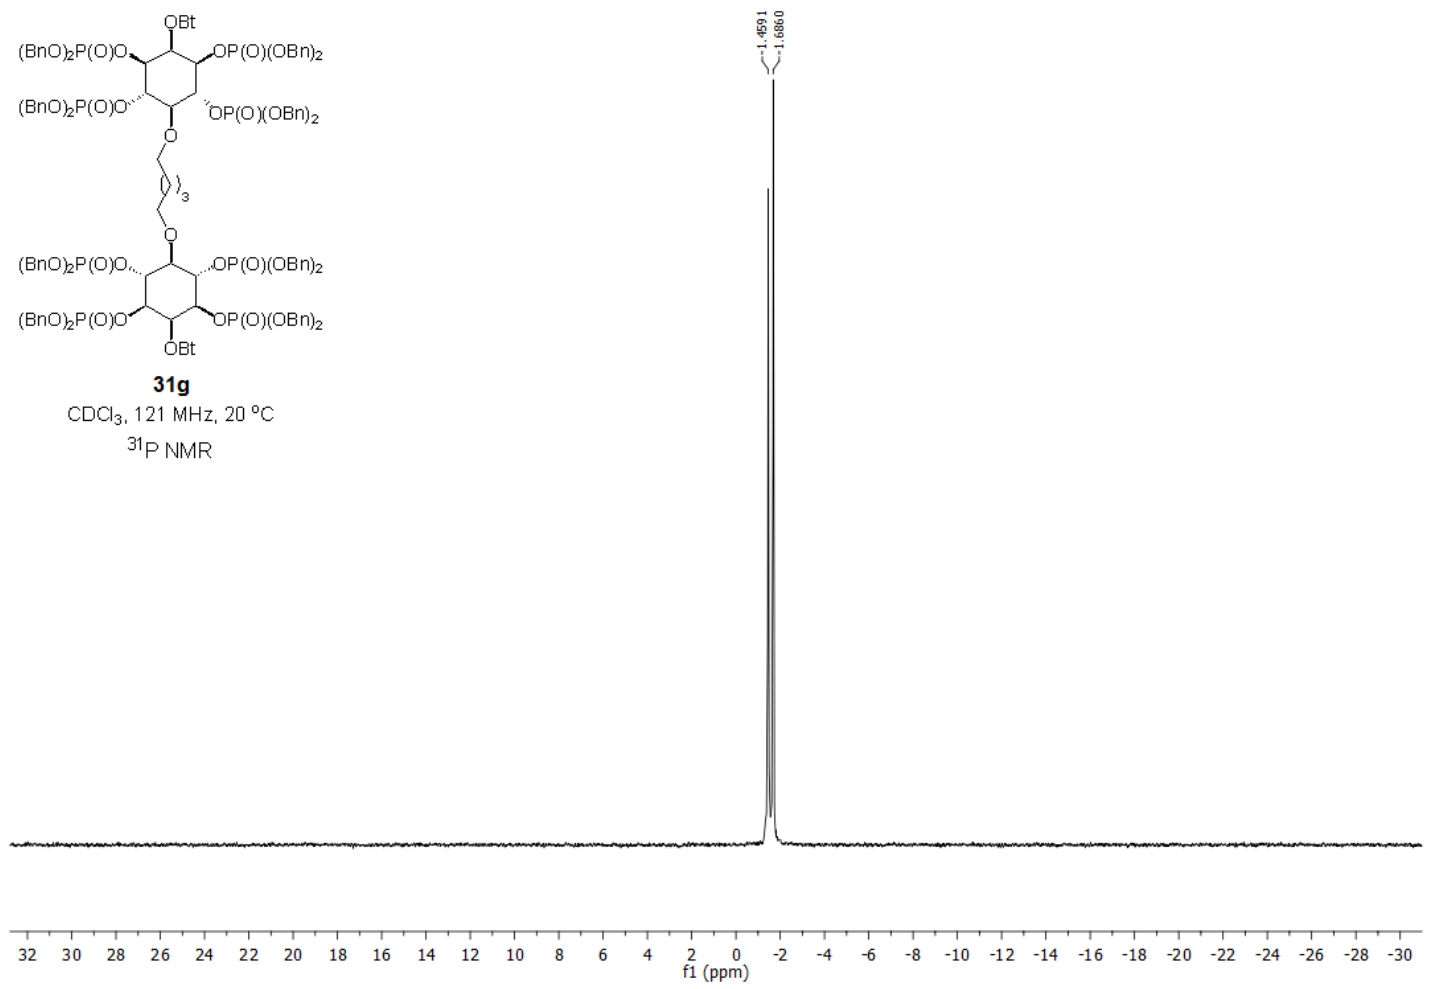

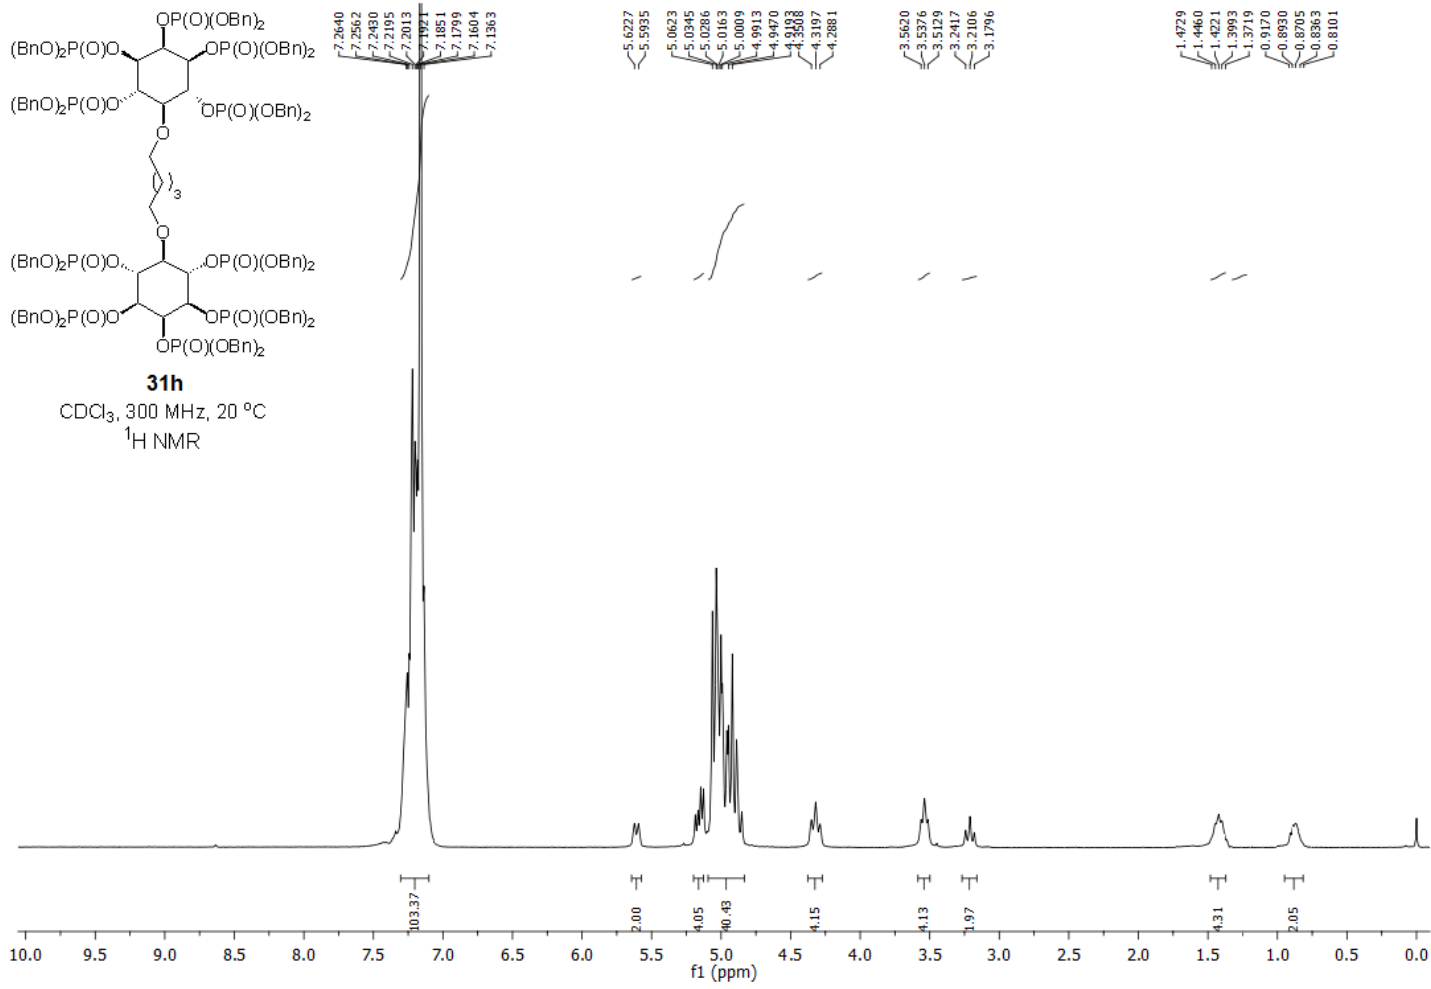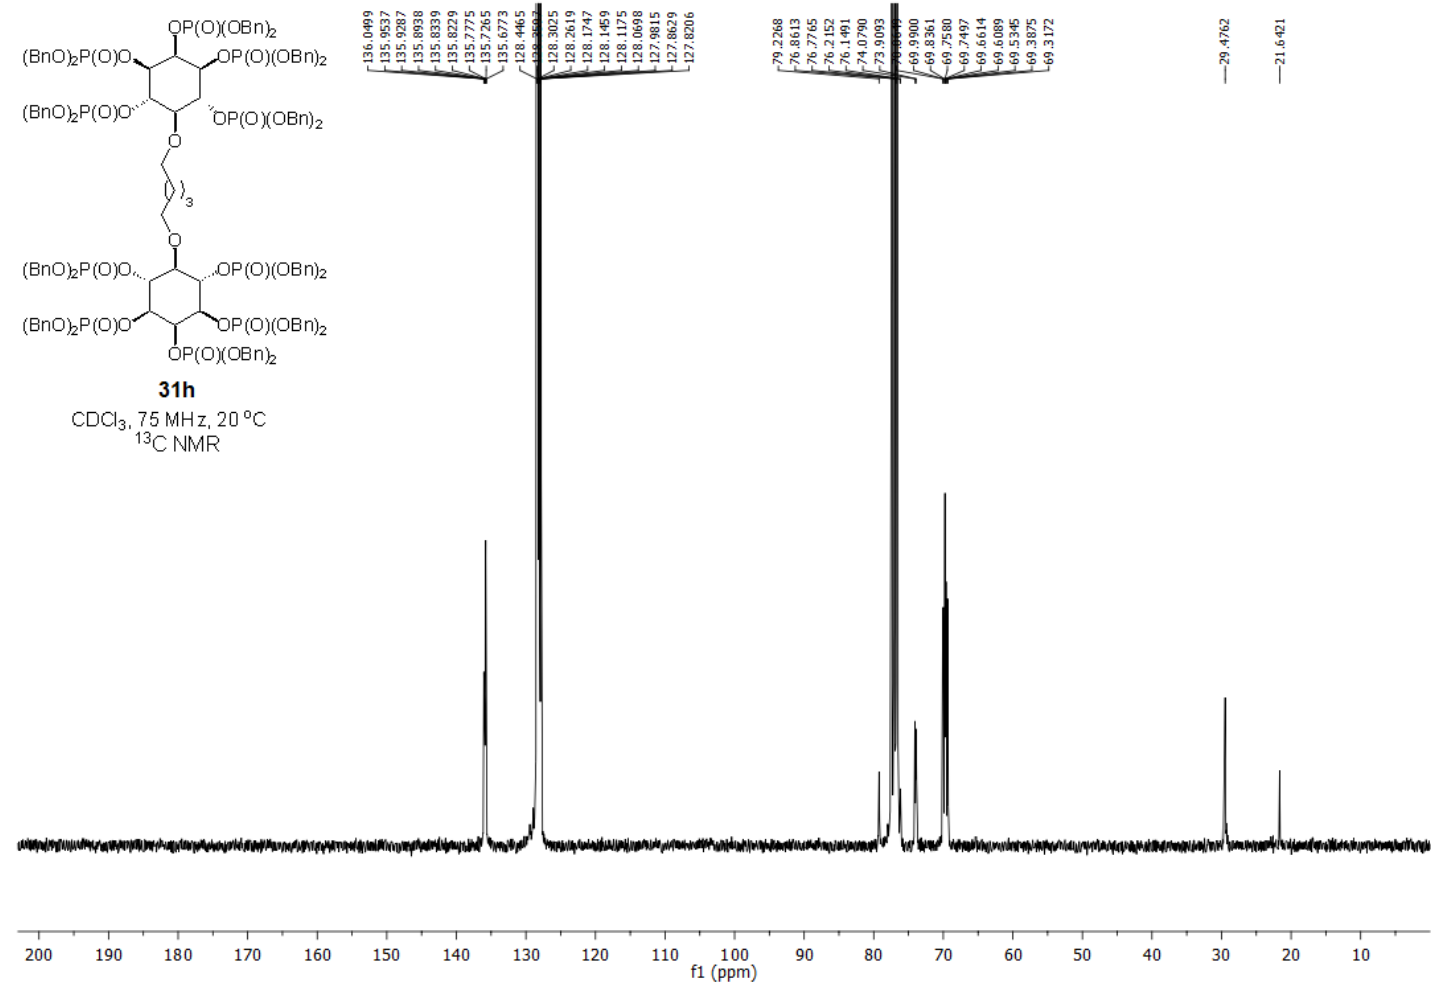

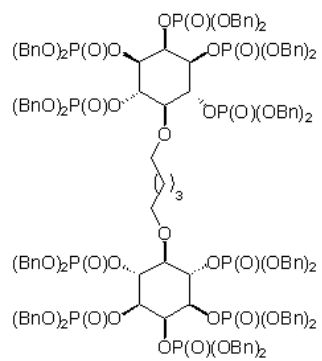

**31h**

$\text{CDCl}_3$ , 121 MHz, 20 °C

$^{31}\text{P}$  NMR

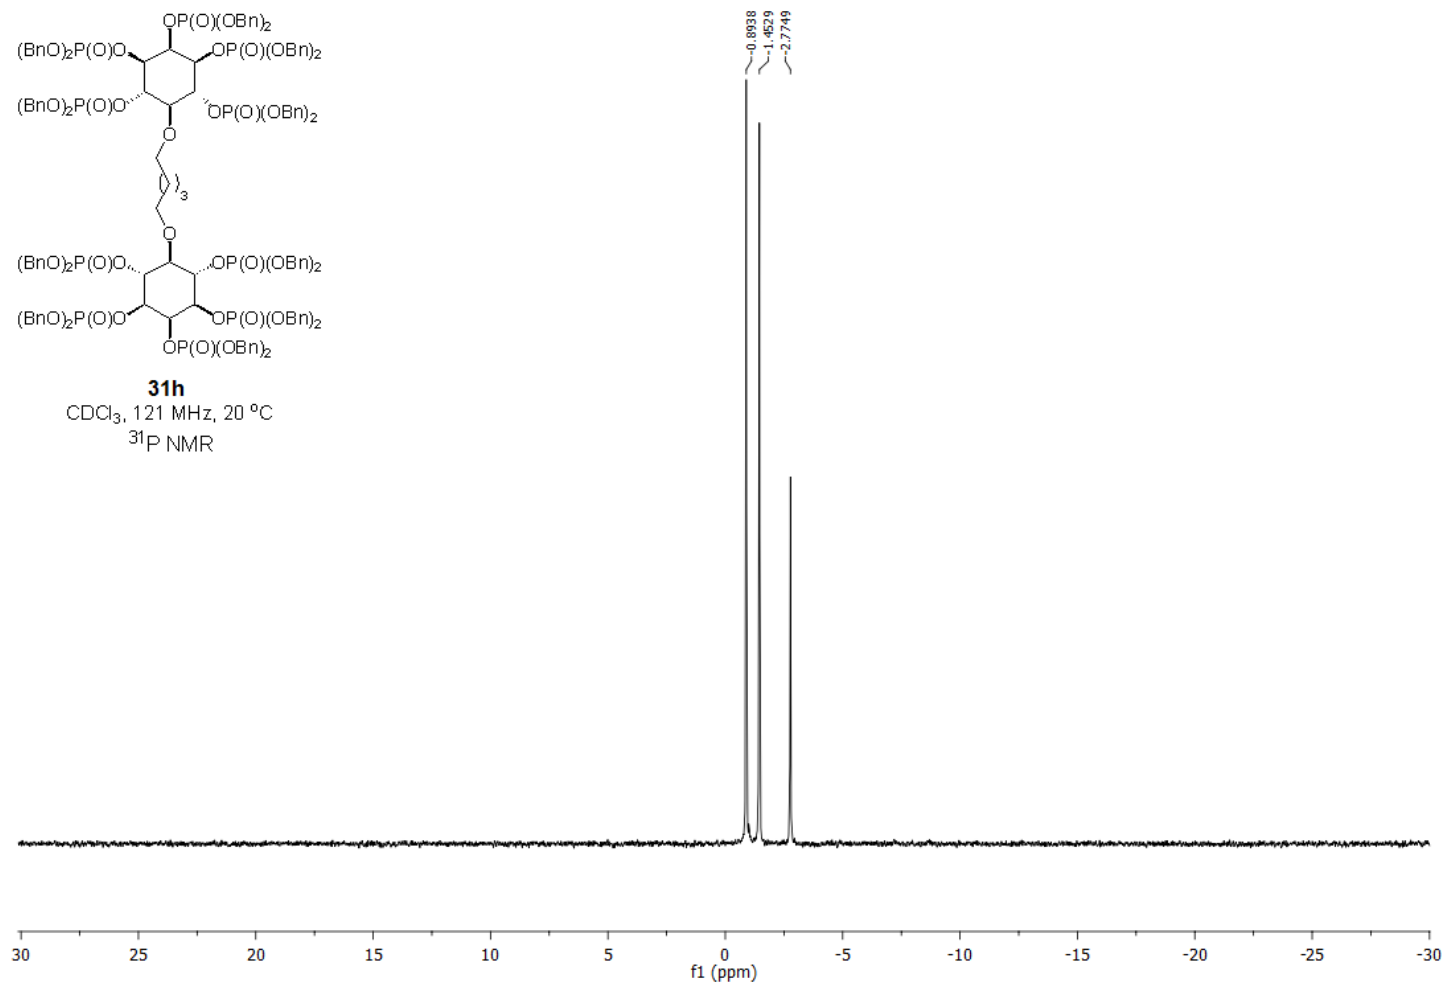

Supplement: c5ob02623g1.pdf [file c5ob02623g1.pdf]
